# Supplementary material
Source: PubMed Central journal article supplement (PMC2777699)
Supplement: NIHMS155873-supplement-Table_1.pdf [file NIHMS155873-supplement-Table_1.pdf]

**Supplementary Table 1. K-means clustering for pattern detection.** The 1601 genes filtered as significant from one way Anova were also grouped using K-mean clustering. These genes were grouped in 12 clusters using the data centroid base research initialization method with Euclidean distance as similarity scale. The intensities are on log2 scale from RMA + Q summarizations.

| K-Mean<br>Order | Probe<br>Names | GBiD      | Gene<br>Symbol | Adj. p-Value<br>≤0.05,<br>Bonferroni |       |       |       |       |       |       |       |       |       |       |       |       |       |       |       |       |       | K-Means<br>Similarity |      |
|-----------------|----------------|-----------|----------------|--------------------------------------|-------|-------|-------|-------|-------|-------|-------|-------|-------|-------|-------|-------|-------|-------|-------|-------|-------|-----------------------|------|
|                 |                |           |                |                                      | c1    | c2    | c3    | 6h1   | 6h2   | 6h3   | 12h1  | 12h2  | 12h3  | 24h1  | 24h2  | 24h3  | 48h1  | 48h2  | 48h3  | 72h1  | 72h2  |                       | 72h3 |
| 1               | 228158_at      | AI623211  | ---            | 0.005882                             | 8.45  | 8.52  | 8.42  | 9.35  | 9.06  | 9.12  | 8.73  | 8.68  | 8.73  | 8.37  | 8.38  | 8.30  | 8.36  | 8.47  | 8.57  | 8.94  | 9.00  | 8.94                  | 3.26 |
| 1               | 224185_at      | U58658    | IL19           | 0.046811                             | 7.52  | 7.65  | 7.71  | 8.62  | 8.57  | 8.68  | 6.79  | 7.17  | 7.16  | 7.33  | 7.34  | 7.51  | 7.49  | 7.44  | 7.57  | 7.77  | 8.01  | 8.40                  | 3.16 |
| 1               | 212048_s_at    | AW245400  | YARS           | 0.036720                             | 9.96  | 10.17 | 10.05 | 10.95 | 10.72 | 10.79 | 9.65  | 9.70  | 9.86  | 9.86  | 9.93  | 9.96  | 9.98  | 9.97  | 10.12 | 10.42 | 10.66 | 10.89                 | 2.91 |
| 1               | 206924_at      | NM_000641 | IL11           | 0.005685                             | 8.71  | 8.19  | 8.60  | 10.57 | 10.54 | 10.52 | 9.26  | 9.69  | 10.04 | 10.28 | 10.61 | 10.15 | 11.35 | 11.18 | 11.62 | 11.01 | 11.21 | 10.66                 | 2.11 |
| 1               | 204597_x_at    | NM_003155 | STC1           | 0.043865                             | 7.06  | 7.08  | 7.40  | 8.70  | 9.06  | 9.01  | 7.42  | 7.67  | 8.43  | 7.99  | 8.11  | 7.75  | 9.40  | 9.36  | 9.62  | 8.84  | 8.96  | 9.03                  | 1.86 |
| 1               | 201925_s_at    | NM_000574 | DAF            | 0.009180                             | 7.61  | 7.68  | 7.67  | 9.49  | 9.74  | 10.12 | 7.88  | 8.37  | 9.03  | 8.89  | 9.05  | 8.88  | 10.53 | 10.44 | 10.90 | 10.17 | 10.24 | 10.61                 | 1.82 |
| 1               | 204595_s_at    | AI300520  | STC1           | 0.035052                             | 7.40  | 7.32  | 7.14  | 8.97  | 9.43  | 9.35  | 7.43  | 7.92  | 8.18  | 8.21  | 8.16  | 7.79  | 9.21  | 9.19  | 9.71  | 8.79  | 9.07  | 8.92                  | 1.62 |
| 1               | 205047_s_at    | NM_001673 | ASNS           | 0.017026                             | 10.13 | 10.24 | 10.35 | 11.34 | 11.15 | 11.61 | 10.35 | 10.21 | 10.73 | 10.29 | 10.21 | 10.45 | 10.69 | 10.73 | 10.85 | 11.74 | 11.75 | 12.08                 | 2.35 |
| 1               | 224367_at      | AF251053  | BEX2           | 0.015911                             | 8.05  | 7.81  | 7.73  | 9.55  | 9.80  | 9.92  | 9.04  | 9.04  | 9.64  | 8.92  | 8.68  | 8.83  | 8.81  | 8.86  | 9.11  | 9.79  | 9.77  | 10.04                 | 2.12 |
| 1               | 202842_s_at    | AL080081  | DNAJB9         | 0.000091                             | 8.76  | 8.70  | 8.72  | 10.42 | 10.53 | 10.82 | 9.75  | 9.73  | 10.25 | 10.98 | 11.06 | 11.01 | 10.97 | 11.00 | 11.18 | 10.79 | 10.71 | 10.65                 | 2.49 |
| 1               | 211936_at      | AF216292  | HSPA5          | 0.017935                             | 10.81 | 10.87 | 10.90 | 12.42 | 12.53 | 12.56 | 11.64 | 11.81 | 12.42 | 12.46 | 12.56 | 12.67 | 12.39 | 12.35 | 12.53 | 12.34 | 12.27 | 12.25                 | 2.32 |
| 1               | 202655_at      | NM_006010 | ARMET          | 0.004903                             | 9.37  | 9.37  | 9.33  | 10.52 | 10.95 | 10.72 | 9.85  | 9.84  | 10.15 | 10.57 | 10.63 | 10.84 | 10.35 | 10.29 | 10.37 | 9.69  | 9.51  | 9.77                  | 3.54 |
| 2               | 227642_at      | AI928242  | TFCP2L1        | 0.028948                             | 7.48  | 7.54  | 7.32  | 6.99  | 7.05  | 7.05  | 6.83  | 6.94  | 6.89  | 6.63  | 6.86  | 6.82  | 6.72  | 6.72  | 6.72  | 6.89  | 6.92  | 6.80                  | 1.86 |
| 2               | 218857_s_at    | NM_025080 | ASRGL1         | 0.020746                             | 9.16  | 9.25  | 9.14  | 8.52  | 8.48  | 8.52  | 8.73  | 8.73  | 8.48  | 8.69  | 8.50  | 8.48  | 8.51  | 8.31  | 8.34  | 8.12  | 7.92  | 8.15                  | 1.61 |
| 2               | 208323_s_at    | NM_004306 | ANXA13         | 0.025622                             | 8.69  | 8.83  | 8.78  | 7.78  | 7.98  | 7.78  | 8.31  | 7.99  | 7.83  | 7.67  | 7.63  | 7.84  | 7.77  | 7.63  | 7.44  | 7.38  | 7.30  | 7.37                  | 1.40 |
| 2               | 228255_at      | AU150140  | ALS2CR4        | 0.014280                             | 7.62  | 7.74  | 7.72  | 7.16  | 6.96  | 7.14  | 7.10  | 7.14  | 7.15  | 6.95  | 6.87  | 6.72  | 6.95  | 6.92  | 6.86  | 6.56  | 6.74  | 6.85                  | 1.29 |
| 2               | 226118_at      | BE326728  | MGC11266       | 0.006790                             | 8.89  | 8.94  | 8.97  | 8.18  | 7.94  | 7.92  | 7.99  | 8.14  | 8.13  | 8.03  | 7.93  | 8.09  | 7.65  | 7.72  | 7.81  | 7.65  | 7.30  | 7.70                  | 1.08 |
| 2               | 201896_s_at    | BC001425  | PSRC1          | 0.011039                             | 8.37  | 8.58  | 8.67  | 7.08  | 6.72  | 6.90  | 7.11  | 7.08  | 7.49  | 7.08  | 6.91  | 7.12  | 6.67  | 6.49  | 6.87  | 6.13  | 6.28  | 6.70                  | 1.13 |
| 2               | 204112_s_at    | NM_006895 | HNMT           | 0.048048                             | 5.50  | 5.75  | 5.43  | 4.77  | 4.81  | 4.89  | 4.91  | 4.88  | 5.02  | 4.83  | 4.74  | 4.87  | 4.70  | 4.65  | 4.80  | 4.68  | 4.63  | 4.81                  | 1.20 |
| 2               | 236344_at      | AW299452  | ---            | 0.001000                             | 8.22  | 8.18  | 8.29  | 7.77  | 7.78  | 7.94  | 7.69  | 7.67  | 7.88  | 7.39  | 7.44  | 7.53  | 7.37  | 7.41  | 7.43  | 7.35  | 7.32  | 7.25                  | 1.63 |
| 2               | 39966_at       | AF059274  | CSPG5          | 0.005766                             | 6.16  | 6.31  | 6.34  | 5.80  | 5.61  | 5.70  | 5.72  | 5.67  | 5.94  | 5.55  | 5.55  | 5.49  | 5.35  | 5.17  | 5.36  | 5.28  | 5.11  | 5.17                  | 1.49 |
| 2               | 222764_at      | AI928342  | ASRGL1         | 0.042166                             | 8.29  | 8.63  | 8.35  | 7.70  | 7.41  | 7.51  | 7.54  | 7.47  | 7.35  | 7.25  | 7.19  | 7.35  | 6.94  | 7.10  | 7.36  | 7.08  | 6.78  | 6.66                  | 1.13 |
| 2               | 204649_at      | NM_005480 | TROAP          | 0.041742                             | 8.90  | 8.96  | 9.02  | 8.06  | 7.96  | 8.03  | 8.08  | 8.17  | 7.78  | 8.17  | 8.01  | 8.24  | 8.37  | 8.32  | 8.22  | 8.12  | 7.94  | 8.00                  | 2.22 |
| 2               | 221520_s_at    | BC001651  | CDCA8          | 0.038405                             | 8.81  | 9.18  | 9.15  | 7.73  | 7.42  | 7.66  | 7.77  | 7.65  | 7.57  | 7.82  | 7.63  | 8.15  | 7.74  | 7.79  | 7.86  | 7.94  | 7.81  | 7.80                  | 2.02 |
| 2               | 209408_at      | U63743    | KIF2C          | 0.015629                             | 9.25  | 9.82  | 9.68  | 8.38  | 8.05  | 8.10  | 8.02  | 8.12  | 7.90  | 8.29  | 8.25  | 8.48  | 8.28  | 8.31  | 8.36  | 8.22  | 8.21  | 8.29                  | 1.93 |
| 2               | 204318_s_at    | NM_016426 | GTSE1          | 0.024029                             | 8.50  | 8.96  | 8.61  | 7.16  | 6.25  | 6.65  | 6.68  | 6.64  | 6.54  | 6.88  | 6.69  | 6.86  | 7.12  | 6.84  | 6.81  | 6.52  | 6.56  | 6.76                  | 1.62 |
| 2               | 204315_s_at    | AI340239  | GTSE1          | 0.000775                             | 8.99  | 8.63  | 8.74  | 7.36  | 6.76  | 6.86  | 7.05  | 7.07  | 6.99  | 7.11  | 7.04  | 6.91  | 6.98  | 6.93  | 6.95  | 6.78  | 6.75  | 6.84                  | 1.23 |
| 2               | 239477_at      | BF941046  | EFHB           | 0.000819                             | 5.36  | 5.25  | 5.37  | 4.60  | 4.56  | 4.62  | 4.54  | 4.54  | 4.70  | 4.79  | 4.72  | 4.59  | 4.54  | 4.55  | 4.50  | 4.55  | 4.51  | 4.51                  | 1.45 |
| 2               | 225355_at      | AK026748  | DKFZP761M1511  | 0.000471                             | 8.75  | 8.92  | 8.94  | 7.06  | 6.94  | 7.41  | 7.21  | 7.31  | 7.08  | 7.24  | 6.92  | 7.19  | 7.22  | 7.27  | 7.24  | 7.05  | 6.80  | 6.90                  | 1.25 |
| 2               | 202094_at      | AA648913  | BIRC5          | 0.038432                             | 9.25  | 9.47  | 9.52  | 8.26  | 7.36  | 8.10  | 7.51  | 7.49  | 7.39  | 7.63  | 7.54  | 7.91  | 7.51  | 7.60  | 7.44  | 7.53  | 7.55  | 7.32                  | 1.31 |
| 2               | 206023_at      | NM_006681 | NMU            | 0.005163                             | 6.45  | 6.53  | 6.51  | 5.94  | 5.72  | 5.95  | 5.58  | 5.58  | 5.65  | 5.71  | 5.78  | 5.68  | 5.73  | 5.55  | 5.79  | 5.70  | 5.59  | 5.67                  | 1.51 |
| 2               | 227420_at      | BF338045  | TNFAIP8L1      | 0.025141                             | 7.14  | 7.39  | 7.38  | 6.72  | 6.59  | 6.53  | 6.55  | 6.48  | 6.38  | 6.60  | 6.63  | 6.60  | 6.29  | 6.56  | 6.44  | 6.46  | 6.42  | 6.46                  | 1.39 |
| 2               | 209891_at      | AF225416  | SPBC25         | 0.014964                             | 7.61  | 8.50  | 8.40  | 6.08  | 5.45  | 6.06  | 5.96  | 6.07  | 6.14  | 5.82  | 5.72  | 6.12  | 5.68  | 5.50  | 5.84  | 5.51  | 5.36  | 5.32                  | 0.88 |
| 2               | 203145_at      | NM_006461 | SPAG5          | 0.014204                             | 9.00  | 9.32  | 9.30  | 8.02  | 7.43  | 7.81  | 7.61  | 7.68  | 7.75  | 7.69  | 7.66  | 8.03  | 7.67  | 7.46  | 7.55  | 7.55  | 7.50  | 7.65                  | 1.13 |
| 2               | 221591_s_at    | BC005004  | FAM64A         | 0.002650                             | 9.55  | 10.17 | 10.06 | 8.28  | 7.87  | 7.81  | 8.02  | 7.93  | 7.80  | 7.99  | 7.96  | 8.44  | 7.70  | 7.61  | 7.81  | 7.45  | 7.35  | 7.37                  | 0.94 |
| 2               | 212801_at      | AI861788  | CIT            | 0.033264                             | 9.62  | 10.32 | 9.95  | 8.38  | 7.81  | 7.94  | 8.07  | 7.99  | 7.93  | 8.12  | 7.81  | 8.55  | 7.95  | 7.78  | 7.99  | 7.56  | 7.72  | 7.56                  | 1.08 |
| 2               | 225777_at      | AW250904  | C9orf140       | 0.012805                             | 9.57  | 9.51  | 9.79  | 8.74  | 8.35  | 8.27  | 8.45  | 8.55  | 8.48  | 8.40  | 8.47  | 8.58  | 8.23  | 8.06  | 8.14  | 8.28  | 8.15  | 7.93                  | 1.08 |
| 2               | 205952_at      | NM_002246 | KCNK3          | 0.026683                             | 8.40  | 8.45  | 8.33  | 7.32  | 7.24  | 6.98  | 7.64  | 7.60  | 7.30  | 7.56  | 7.59  | 7.33  | 7.26  | 7.21  | 7.22  | 7.18  | 7.40  | 7.22                  | 1.84 |
| 2               | 212811_x_at    | AI889380  | SLC1A4         | 0.021128                             | 9.30  | 9.39  | 9.39  | 8.96  | 8.96  | 9.10  | 8.47  | 8.61  | 8.43  | 8.36  | 8.33  | 8.47  | 8.63  | 8.58  | 8.88  | 8.79  | 8.94  | 8.74                  | 3.06 |
| 2               | 209610_s_at    | BF340083  | SLC1A4         | 0.032992                             | 8.97  | 9.12  | 9.14  | 8.78  | 8.38  | 8.84  | 7.73  | 7.62  | 7.86  | 7.69  | 7.60  | 7.90  | 7.94  | 7.84  | 8.23  | 8.30  | 8.38  | 8.42                  | 3.20 |
| 2               | 238868_at      | AW264269  | UACA           | 0.005744                             | 5.70  | 5.80  | 5.60  | 5.01  | 5.09  | 5.19  | 5.46  | 5.23  | 5.47  | 4.97  | 4.88  | 5.04  | 4.64  | 4.69  | 4.87  | 4.67  | 4.55  | 4.65                  | 1.98 |
| 2               | 202454_s_at    | NM_001982 | ERBB3          | 0.005155                             | 7.79  | 7.62  | 7.45  | 6.62  | 6.51  | 6.85  | 7.37  | 7.14  | 7.25  | 6.65  | 6.39  | 6.44  | 6.31  | 6.50  | 6.30  | 6.26  | 6.39  | 6.34                  | 2.14 |
| 2               | 237435_at      | AI093492  | ---            | 0.005354                             | 7.27  | 7.55  | 7.13  | 5.77  | 5.63  | 6.44  | 7.10  | 6.54  | 7.43  | 4.95  | 4.77  | 5.00  | 4.73  | 4.64  | 4.47  | 4.52  | 4.62  | 5.05                  | 2.62 |
| 2               | 203409_at      | NM_000107 | DDDB2 /// LHX3 | 0.046828                             | 9.89  | 10.2  |       |       |       |       |       |       |       |       |       |       |       |       |       |       |       |                       |      |

| K-Mean<br>Order | Probe<br>Names | Gene<br>GBId<br>Symbol | Adj. p-Value<br>≤0.05, |          |       |       |       |       |       |       |       |       |       |       |       |       |       |       |       |       |       | K-Means<br>Similarity |      |
|-----------------|----------------|------------------------|------------------------|----------|-------|-------|-------|-------|-------|-------|-------|-------|-------|-------|-------|-------|-------|-------|-------|-------|-------|-----------------------|------|
|                 |                |                        | Bonferroni             | c1       | c2    | c3    | 6h1   | 6h2   | 6h3   | 12h1  | 12h2  | 12h3  | 24h1  | 24h2  | 24h3  | 48h1  | 48h2  | 48h3  | 72h1  | 72h2  | 72h3  |                       |      |
| 3               | 218491_s_at    | NM_014174              | THY28                  | 0.00038  | 7.57  | 7.81  | 7.74  | 8.01  | 8.05  | 8.19  | 7.62  | 7.59  | 7.56  | 7.47  | 7.22  | 7.36  | 6.66  | 6.73  | 6.62  | 6.76  | 6.59  | 6.56                  | 0.98 |
| 3               | 220486_x_at    | NM_017698              | RP13-360B22.2          | 0.017383 | 9.57  | 9.97  | 9.58  | 10.04 | 10.15 | 9.93  | 9.91  | 9.92  | 9.84  | 9.48  | 9.47  | 9.48  | 8.89  | 9.13  | 9.13  | 8.95  | 8.92  | 9.05                  | 1.36 |
| 3               | 200895_s_at    | NM_002014              | FKBP4                  | 0.002026 | 9.72  | 9.79  | 9.89  | 10.01 | 10.16 | 9.86  | 9.78  | 9.97  | 9.85  | 9.56  | 9.49  | 9.51  | 9.27  | 9.23  | 9.15  | 9.11  | 9.11  | 9.13                  | 1.36 |
| 3               | 225389_at      | AW149498               | BTBD6                  | 0.002227 | 8.81  | 9.11  | 9.04  | 9.27  | 9.07  | 8.84  | 8.56  | 8.50  | 8.49  | 8.41  | 8.36  | 8.53  | 7.81  | 7.88  | 7.75  | 7.81  | 7.56  | 7.79                  | 1.52 |
| 3               | 214830_at      | AI537540               | SLC38A6                | 0.003686 | 6.84  | 7.19  | 6.99  | 8.10  | 8.20  | 8.76  | 7.93  | 7.54  | 8.32  | 6.87  | 6.77  | 7.05  | 5.49  | 5.53  | 5.98  | 4.84  | 4.78  | 5.53                  | 1.47 |
| 3               | 221637_s_at    | BC001434               | MGC2477                | 0.011743 | 9.09  | 9.19  | 9.14  | 9.57  | 9.45  | 9.53  | 9.21  | 9.11  | 9.13  | 8.97  | 8.77  | 8.93  | 8.38  | 8.28  | 8.57  | 8.62  | 8.71  | 8.89                  | 1.41 |
| 3               | 202382_s_at    | NM_005471              | GNPDA1                 | 0.000226 | 8.57  | 8.85  | 8.76  | 9.40  | 9.39  | 9.30  | 8.83  | 8.79  | 8.89  | 8.48  | 8.47  | 8.62  | 8.00  | 7.81  | 7.98  | 8.15  | 8.14  | 8.32                  | 1.12 |
| 3               | 227862_at      | AA037766               | LOC388610              | 0.014539 | 9.53  | 9.58  | 9.47  | 10.67 | 10.53 | 10.77 | 10.07 | 9.91  | 10.29 | 9.49  | 9.46  | 9.39  | 8.83  | 8.38  | 9.12  | 9.00  | 8.97  | 9.23                  | 1.62 |
| 3               | 218571_s_at    | NM_014169              | CHMP4A                 | 0.022747 | 9.09  | 9.13  | 9.11  | 9.92  | 9.84  | 9.69  | 9.38  | 9.31  | 9.47  | 9.11  | 9.14  | 9.16  | 8.73  | 8.62  | 8.94  | 8.99  | 9.05  | 9.22                  | 2.24 |
| 3               | 200974_at      | NM_001613              | ACTA2                  | 0.028904 | 8.19  | 8.21  | 8.37  | 8.91  | 8.91  | 8.91  | 8.36  | 8.52  | 8.35  | 8.19  | 8.30  | 8.14  | 7.70  | 7.76  | 7.95  | 7.93  | 8.19  | 8.23                  | 2.02 |
| 3               | 209509_s_at    | BC000325               | DPAGT1                 | 0.000906 | 8.19  | 8.41  | 8.19  | 9.48  | 9.83  | 9.64  | 8.80  | 8.78  | 9.25  | 8.70  | 8.62  | 8.74  | 7.62  | 7.59  | 7.78  | 7.91  | 8.01  | 7.75                  | 2.03 |
| 3               | 218417_s_at    | NM_017842              | FLJ20489               | 0.037705 | 7.93  | 8.18  | 8.08  | 8.59  | 8.84  | 8.48  | 8.06  | 8.07  | 7.74  | 7.53  | 7.62  | 7.78  | 7.38  | 7.15  | 6.95  | 7.21  | 7.40  | 7.20                  | 1.44 |
| 3               | 1558152_at     | BE092211               | CHID1                  | 0.009967 | 5.46  | 5.55  | 5.62  | 5.93  | 5.94  | 6.05  | 5.61  | 5.58  | 5.73  | 5.52  | 5.41  | 5.52  | 5.32  | 5.33  | 5.23  | 5.25  | 5.34  | 5.22                  | 1.40 |
| 3               | 219508_at      | NM_004751              | GCNT3                  | 0.014839 | 8.37  | 8.59  | 8.55  | 9.39  | 9.55  | 9.08  | 8.65  | 8.53  | 8.66  | 8.45  | 8.36  | 8.56  | 7.98  | 8.17  | 8.12  | 8.07  | 8.13  | 8.07                  | 1.71 |
| 3               | 201500_s_at    | NM_021959              | PPP1R11                | 0.000030 | 9.88  | 9.96  | 9.95  | 10.67 | 10.65 | 10.63 | 9.94  | 9.85  | 9.93  | 9.70  | 9.67  | 9.80  | 9.13  | 9.35  | 9.44  | 9.34  | 9.37  | 9.43                  | 1.11 |
| 3               | 227550_at      | AW242720               | LOC143381              | 0.026449 | 7.47  | 7.68  | 7.62  | 8.06  | 7.97  | 7.91  | 7.57  | 7.70  | 7.69  | 7.38  | 7.34  | 7.45  | 7.18  | 7.39  | 7.22  | 7.21  | 7.19  | 7.29                  | 1.24 |
| 3               | 226438_at      | AK025100               | SNTB1                  | 0.016673 | 7.20  | 7.14  | 7.21  | 7.66  | 7.66  | 7.61  | 7.11  | 7.06  | 7.16  | 7.02  | 7.18  | 7.20  | 6.73  | 6.62  | 6.71  | 6.69  | 6.82  | 6.41                  | 1.63 |
| 3               | 224690_at      | BG432350               | C20orf108              | 0.018187 | 8.08  | 7.98  | 8.08  | 8.59  | 8.39  | 8.61  | 8.30  | 8.05  | 8.51  | 7.60  | 7.50  | 7.63  | 7.47  | 7.59  | 7.55  | 7.05  | 7.03  | 7.41                  | 1.49 |
| 3               | 238601_at      | AI798207               | PHKB                   | 0.008392 | 6.43  | 6.30  | 6.10  | 7.69  | 7.44  | 8.21  | 6.83  | 6.59  | 7.22  | 5.96  | 5.77  | 5.95  | 5.65  | 5.52  | 5.50  | 5.04  | 5.07  | 5.49                  | 1.45 |
| 3               | 201826_s_at    | NM_016002              | SCCPDH                 | 0.016128 | 7.93  | 8.02  | 7.99  | 8.46  | 8.17  | 8.35  | 8.03  | 7.92  | 8.04  | 7.65  | 7.72  | 7.56  | 7.57  | 7.67  | 7.40  | 7.43  | 7.42  | 7.42                  | 1.30 |
| 3               | 219520_s_at    | NM_018458              | KIAA1280               | 0.000004 | 8.92  | 9.18  | 8.96  | 9.89  | 10.01 | 10.00 | 8.97  | 9.03  | 9.07  | 8.67  | 8.65  | 8.66  | 8.12  | 8.25  | 8.40  | 7.50  | 7.60  | 7.79                  | 1.17 |
| 3               | 222451_s_at    | BC003128               | ZDHHC9                 | 0.000588 | 9.28  | 9.31  | 9.15  | 9.90  | 10.04 | 9.62  | 9.32  | 9.46  | 9.49  | 9.21  | 9.14  | 9.23  | 8.74  | 8.76  | 8.77  | 8.32  | 8.41  | 8.45                  | 1.54 |
| 3               | 225273_at      | AB033106               | KIAA1280               | 0.005015 | 9.69  | 10.10 | 9.85  | 10.75 | 10.60 | 10.30 | 9.72  | 9.81  | 10.02 | 9.62  | 9.66  | 9.70  | 8.87  | 8.82  | 9.25  | 8.42  | 8.58  | 8.66                  | 1.28 |
| 3               | 201814_at      | AI300084               | TBC1D5                 | 0.000080 | 8.98  | 9.17  | 9.15  | 9.66  | 9.52  | 9.78  | 9.00  | 9.02  | 9.20  | 8.86  | 8.98  | 8.95  | 8.29  | 8.35  | 8.55  | 7.71  | 7.83  | 7.94                  | 1.41 |
| 3               | 201813_s_at    | AI654161               | TBC1D5                 | 0.003817 | 9.24  | 9.39  | 9.15  | 9.98  | 9.96  | 10.02 | 9.29  | 9.24  | 9.44  | 9.25  | 9.24  | 9.24  | 8.48  | 8.43  | 9.04  | 8.02  | 8.21  | 7.98                  | 1.67 |
| 3               | 209825_s_at    | BC002906               | UCK2                   | 0.000970 | 9.29  | 9.30  | 9.47  | 9.99  | 10.04 | 9.70  | 9.27  | 9.35  | 9.32  | 9.26  | 9.20  | 9.39  | 8.60  | 8.70  | 8.84  | 8.52  | 8.39  | 8.32                  | 1.51 |
| 3               | 244661_at      | AA946876               | SOAT1                  | 0.008437 | 4.97  | 4.94  | 4.88  | 5.09  | 5.09  | 5.12  | 4.95  | 5.02  | 4.96  | 4.87  | 4.91  | 4.80  | 4.73  | 4.82  | 4.78  | 4.68  | 4.62  | 4.69                  | 1.49 |
| 3               | 216862_s_at    | Z24459                 | MTCP1                  | 0.035501 | 8.65  | 8.55  | 8.49  | 9.08  | 8.99  | 9.20  | 8.73  | 8.64  | 8.91  | 8.62  | 8.35  | 8.47  | 7.70  | 7.56  | 7.85  | 7.68  | 8.05  | 8.17                  | 1.49 |
| 3               | 221622_s_at    | AF246240               | HT007                  | 0.027021 | 9.04  | 9.18  | 9.25  | 9.99  | 9.83  | 10.32 | 9.52  | 9.45  | 9.93  | 9.29  | 9.14  | 9.49  | 8.00  | 8.12  | 8.47  | 8.16  | 8.53  | 8.37                  | 1.61 |
| 3               | 200757_s_at    | NM_001219              | CALU                   | 0.000798 | 10.09 | 10.21 | 10.15 | 10.59 | 10.81 | 10.48 | 10.26 | 10.29 | 10.31 | 9.90  | 9.86  | 9.94  | 9.06  | 9.16  | 9.39  | 9.13  | 8.85  | 9.24                  | 1.14 |
| 3               | 202857_at      | NM_014255              | TMEM4                  | 0.001212 | 9.72  | 10.01 | 9.91  | 10.65 | 10.85 | 10.78 | 10.22 | 10.07 | 10.45 | 9.56  | 9.47  | 9.70  | 8.29  | 8.31  | 8.65  | 8.22  | 8.10  | 8.82                  | 1.06 |
| 3               | 226145_s_at    | AL157471               | FRAS1                  | 0.002540 | 6.98  | 7.52  | 7.04  | 8.70  | 8.50  | 8.80  | 6.92  | 7.65  | 8.02  | 6.96  | 6.62  | 6.81  | 5.41  | 5.26  | 5.60  | 5.21  | 5.04  | 5.59                  | 0.94 |
| 3               | 238574_at      | BF724944               | MCART1                 | 0.002614 | 6.95  | 7.08  | 7.06  | 7.60  | 7.68  | 7.48  | 7.01  | 7.21  | 7.34  | 6.96  | 6.87  | 6.87  | 6.19  | 6.45  | 6.41  | 6.23  | 6.26  | 6.46                  | 1.07 |
| 3               | 227769_at      | AI703476               | GPR27                  | 0.028661 | 7.58  | 7.73  | 7.93  | 8.77  | 8.64  | 9.18  | 7.85  | 8.05  | 8.95  | 7.39  | 7.44  | 7.71  | 6.27  | 6.42  | 6.56  | 6.33  | 6.23  | 6.47                  | 1.19 |
| 3               | 223171_at      | BC001252               | DYM                    | 0.022834 | 7.97  | 8.30  | 8.23  | 8.49  | 8.69  | 8.71  | 8.00  | 8.13  | 8.48  | 7.95  | 7.84  | 7.98  | 7.21  | 7.13  | 7.50  | 7.10  | 7.17  | 7.27                  | 1.00 |
| 3               | 203150_at      | NM_005833              | RABEPK                 | 0.011883 | 8.74  | 8.89  | 8.92  | 9.32  | 9.27  | 9.60  | 8.70  | 8.80  | 9.22  | 8.61  | 8.62  | 8.65  | 7.87  | 7.86  | 8.10  | 7.84  | 7.90  | 8.05                  | 0.90 |
| 3               | 202680_at      | NM_002095              | GTF2E2                 | 0.002717 | 8.40  | 8.73  | 8.64  | 9.35  | 9.15  | 9.48  | 8.58  | 8.64  | 9.01  | 8.72  | 8.57  | 8.66  | 7.68  | 7.76  | 7.84  | 7.40  | 7.66  | 7.65                  | 1.37 |
| 3               | 225252_at      | AL121758               | SRXN1                  | 0.005914 | 11.64 | 11.96 | 12.01 | 12.41 | 12.48 | 12.47 | 11.83 | 11.77 | 12.01 | 11.83 | 11.96 | 12.11 | 11.16 | 11.05 | 11.32 | 10.99 | 11.00 | 11.19                 | 1.57 |
| 3               | 60474_at       | AA469071               | C20orf42               | 0.032884 | 7.97  | 7.95  | 7.75  | 8.63  | 8.22  | 8.83  | 8.07  | 8.10  | 8.60  | 7.80  | 7.61  | 7.60  | 6.71  | 6.60  | 6.99  | 6.86  | 6.56  | 6.92                  | 1.30 |
| 3               | 202975_s_at    | N21138                 | RHOBTB3                | 0.004226 | 9.04  | 9.56  | 8.83  | 9.80  | 9.53  | 10.06 | 9.35  | 9.00  | 9.35  | 8.80  | 8.43  | 8.49  | 7.52  | 7.23  | 7.31  | 7.15  | 7.22  | 7.63                  | 1.09 |
| 3               | 218773_s_at    | NM_012228              | MSRB2                  | 0.000994 | 8.85  | 9.02  | 8.82  | 9.54  | 9.34  | 9.33  | 9.10  | 8.76  | 9.00  | 8.40  | 8.30  | 8.48  | 7.29  | 7.19  | 7.50  | 7.28  | 7.58  | 7.91                  | 1.10 |
| 3               | 203794_at      | NM_014826              | CDC42BPA               | 0.033376 | 8.76  | 9.00  | 9.05  | 8.92  | 9.12  | 9.05  | 8.72  | 8.76  | 8.78  | 8.45  | 8.56  | 8.53  | 8.25  | 8.36  | 8.39  | 8.11  | 8.22  | 8.33                  | 1.27 |
| 3               | 212321_at      | AB033078               | ---                    | 0.007223 | 8.56  | 8.69  | 8.56  | 9.03  | 8.95  | 9.06  | 8.26  | 8.27  | 8.41  | 8.09  | 8.07  | 8.20  | 7.89  | 7.84  | 7.94  | 7.43  | 7.26  | 7.84                  | 1.26 |
| 3               | 202297_s_at    | AF157324               | RER1                   | 0.000034 | 8.87  | 9.17  | 9.04  | 9.55  | 9.66  | 9.52  | 8.84  | 8.72  | 8.88  | 8.41  | 8.32  | 8.56  | 7.74  | 7.71  | 7.91  | 7.63  | 7.66  | 7.89                  | 0.59 |
| 3               | 203800_s_at    | BG254653               | MRPS14                 | 0.000160 | 8.66  | 8.77  | 8.85  | 9.14  | 9.21  | 9.26  | 8.63  | 8.60  | 8.75  | 8.51  | 8.34  | 8.55  | 8.16  | 8.12  | 8.06  | 8.02  | 8.14  | 8.05                  | 0.83 |
| 3               | 223461_at      | AF151073               | TBC1D7                 | 0.005804 | 8.08  | 8.39  | 8.35  | 8.84  | 8.76  | 9.10  | 8.07  | 7.92  | 8.19  | 8.01  | 7.69  | 8.04  | 7.29  | 7.24  | 7.32  | 7.39  | 7.04  | 7.30                  | 0.95 |
| 3               | 218403_at      | NM_016399              | P53CSV                 | 0.045913 | 10.08 | 10.02 | 10.05 | 10.49 | 10.37 | 10.82 | 9.71  | 9.80  | 10.17 | 9.57  | 9.49  | 9.44  | 8.73  | 8.97  | 9.15  | 8.85  | 8.91  | 9.29                  | 0.87 |
| 3               | 216048_s_at    | AK023621               | RHOBTB3                | 0.005349 | 6.86  | 7.26  | 7.06  | 7.13  | 7.33  | 7.49  | 6.97  | 6.98  | 6.98  | 6.65  | 6.42  | 6.56  | 6.04  | 6.17  | 6.39  | 5.86  | 5.86  | 5.91                  | 1.16 |
| 3               | 207124_s_at    | NM_006578              | GNB5                   | 0.004957 | 7.79  | 8.28  | 8.25  | 8.48  | 8.30  | 8.58  | 7.87  | 7.94  | 8.06  | 7.73  | 7.53  | 7.74  | 7.19  | 7.26  | 7.36  | 6.88  | 6.65  | 6.74                  | 1.32 |
| 3               | 205078_at      | NM_002643              | PIGF                   | 0.017916 | 7.22  | 8.05  | 7.99  | 8.36  | 8.18  | 8.67  | 7.45  | 7.10  | 7.71  | 7.05  | 6.75  | 7.28  | 6.04  | 6.25  | 6.14  | 5.79  | 5.57  | 5.84                  | 1.01 |
| 3               | 207298_at      | NM_006632              | SLC17A3                | 0.001016 | 6.88  | 7.04  | 6.78  | 7.14  | 7.20  | 7.43  | 6.85  | 6.72  | 6.91  | 6.44  | 6.59  | 6.56  | 5.98  | 6.03  | 6.23  | 5.82  | 5.77  | 5.94                  | 0.92 |
| 3               | 200979_at      | BF739979               | MAP3K15                | 0.008549 | 7.82  | 8.11  | 7.95  | 8.46  | 8.23  | 8.77  | 7.9   |       |       |       |       |       |       |       |       |       |       |                       |      |

| K-Mean<br>Order | Probe<br>Names | Gene<br>Symbol | Adj. p-Value<br><=0.05,<br>Bonferroni | K-Means  |       |       |       |       |       |       |       |       |       |       |       |       |       |       |       |       |       |       | K-Means<br>Similarity |
|-----------------|----------------|----------------|---------------------------------------|----------|-------|-------|-------|-------|-------|-------|-------|-------|-------|-------|-------|-------|-------|-------|-------|-------|-------|-------|-----------------------|
|                 |                |                |                                       | c1       | c2    | c3    | 6h1   | 6h2   | 6h3   | 12h1  | 12h2  | 12h3  | 24h1  | 24h2  | 24h3  | 48h1  | 48h2  | 48h3  | 72h1  | 72h2  | 72h3  |       |                       |
| 3               | 203786_s_at    | NM_003287      | TPD52L1                               | 0.003377 | 10.99 | 11.11 | 11.10 | 11.22 | 10.92 | 11.44 | 10.60 | 10.40 | 10.82 | 10.07 | 9.93  | 10.16 | 9.36  | 9.27  | 9.76  | 9.41  | 9.54  | 9.51  | 1.13                  |
| 3               | 204779_s_at    | NM_004502      | HOXB7                                 | 0.011084 | 9.42  | 9.58  | 9.37  | 9.25  | 9.17  | 9.40  | 9.02  | 8.98  | 9.13  | 8.77  | 8.54  | 8.58  | 8.25  | 8.13  | 8.55  | 8.34  | 8.41  | 8.45  | 1.82                  |
| 3               | 223451_s_at    | AF096895       | CKLF                                  | 0.033584 | 7.84  | 8.13  | 7.94  | 8.41  | 7.95  | 8.55  | 7.75  | 7.24  | 7.60  | 6.95  | 6.64  | 7.30  | 6.23  | 6.39  | 6.08  | 6.53  | 6.72  | 6.40  | 1.35                  |
| 3               | 228240_at      | AW952320       | ---                                   | 0.000001 | 8.54  | 8.59  | 8.60  | 8.82  | 8.75  | 8.85  | 8.29  | 8.25  | 8.30  | 7.51  | 7.52  | 7.64  | 7.22  | 7.50  | 7.33  | 7.41  | 7.34  | 7.27  | 1.22                  |
| 3               | 49452_at       | AI057637       | ACACB                                 | 0.001468 | 6.69  | 6.78  | 6.77  | 6.75  | 6.77  | 6.81  | 6.58  | 6.49  | 6.46  | 6.24  | 6.31  | 6.44  | 6.14  | 6.17  | 6.08  | 6.18  | 6.00  | 6.03  | 1.46                  |
| 3               | 226565_at      | AW054855       | MGC21518                              | 0.005002 | 8.88  | 8.61  | 8.69  | 8.89  | 8.77  | 8.90  | 8.60  | 8.52  | 8.53  | 8.40  | 8.25  | 8.29  | 7.91  | 7.99  | 8.03  | 8.12  | 8.00  | 8.19  | 1.33                  |
| 3               | 235109_at      | AI887983       | ---                                   | 0.026482 | 8.40  | 8.49  | 8.38  | 8.53  | 8.25  | 8.59  | 8.17  | 8.17  | 8.18  | 7.97  | 7.82  | 7.96  | 7.36  | 7.39  | 7.66  | 7.83  | 7.84  | 7.93  | 1.90                  |
| 3               | 229958_at      | W93695         | C8orf61                               | 0.012926 | 7.18  | 7.43  | 7.24  | 7.79  | 7.58  | 7.82  | 6.97  | 6.89  | 7.12  | 6.61  | 6.37  | 6.46  | 6.42  | 6.37  | 6.28  | 6.18  | 6.29  | 6.69  | 1.32                  |
| 3               | 242775_at      | BF477980       | LTB4DH                                | 0.000457 | 10.64 | 10.85 | 10.76 | 11.18 | 10.93 | 11.16 | 9.73  | 9.69  | 10.09 | 9.57  | 9.55  | 9.55  | 9.36  | 9.27  | 9.51  | 9.13  | 9.31  | 9.56  | 1.70                  |
| 3               | 201746_at      | NM_000546      | TP53                                  | 0.004925 | 9.54  | 9.63  | 9.78  | 10.39 | 10.31 | 10.16 | 9.10  | 9.35  | 9.07  | 9.21  | 9.35  | 8.92  | 8.67  | 8.51  | 9.08  | 8.28  | 8.18  | 8.27  | 1.63                  |
| 3               | 225197_at      | W58461         | PRO0149                               | 0.013920 | 8.96  | 9.02  | 8.94  | 9.15  | 8.70  | 8.26  | 8.06  | 8.06  | 7.69  | 7.66  | 7.78  | 7.63  | 7.44  | 7.55  | 7.67  | 6.91  | 6.76  | 6.93  | 2.39                  |
| 3               | 204602_at      | NM_012242      | DKK1                                  | 0.003953 | 12.29 | 12.48 | 12.44 | 12.47 | 12.49 | 12.64 | 12.12 | 11.99 | 12.32 | 11.49 | 11.34 | 11.65 | 11.54 | 11.51 | 11.83 | 11.16 | 11.07 | 11.23 | 1.68                  |
| 3               | 235501_at      | AW961576       | FARP1                                 | 0.024194 | 8.33  | 8.50  | 8.44  | 8.22  | 8.37  | 8.49  | 8.13  | 8.09  | 8.32  | 7.67  | 7.70  | 7.90  | 7.68  | 7.77  | 7.77  | 7.48  | 7.35  | 7.59  | 1.81                  |
| 3               | 226183_at      | AW139538       | GSK3B                                 | 0.020506 | 8.39  | 8.72  | 8.50  | 8.28  | 8.14  | 8.49  | 8.01  | 8.04  | 8.16  | 7.31  | 7.46  | 7.34  | 7.23  | 7.52  | 7.34  | 6.63  | 6.69  | 7.24  | 2.04                  |
| 3               | 226177_at      | AI052020       | GLTP                                  | 0.006088 | 9.30  | 9.39  | 9.45  | 9.31  | 9.21  | 9.16  | 8.94  | 8.99  | 9.19  | 8.67  | 8.53  | 8.60  | 8.67  | 8.71  | 8.56  | 8.62  | 8.52  | 8.68  | 2.30                  |
| 3               | 57540_at       | AI823980       | RBKS                                  | 0.004989 | 8.20  | 8.09  | 8.15  | 8.27  | 8.19  | 8.36  | 8.06  | 8.04  | 8.09  | 7.80  | 7.83  | 7.81  | 7.56  | 7.39  | 7.58  | 8.23  | 8.30  | 8.45  | 4.14                  |
| 3               | 1569582_at     | BC014344       | LOC201651                             | 0.011665 | 5.47  | 5.46  | 5.35  | 6.92  | 7.16  | 7.35  | 6.07  | 6.02  | 6.55  | 5.46  | 5.42  | 5.34  | 5.45  | 5.53  | 5.64  | 5.20  | 5.26  | 5.69  | 2.70                  |
| 3               | 232990_at      | BG285399       | CXorf44                               | 0.023871 | 4.31  | 4.26  | 4.29  | 4.69  | 4.70  | 4.91  | 4.44  | 4.39  | 4.41  | 4.25  | 4.27  | 4.22  | 4.18  | 4.33  | 4.27  | 4.17  | 4.15  | 4.19  | 2.36                  |
| 3               | 225282_at      | AF087875       | PRKAG2                                | 0.003515 | 7.70  | 7.96  | 7.87  | 8.50  | 8.28  | 8.62  | 7.65  | 7.59  | 7.64  | 7.47  | 7.57  | 7.56  | 7.30  | 7.25  | 7.09  | 7.37  | 7.29  | 7.46  | 1.62                  |
| 3               | 230326_s_at    | AA782955       | HSPC138                               | 0.035872 | 9.01  | 9.09  | 9.02  | 9.72  | 9.60  | 10.16 | 8.90  | 8.82  | 9.13  | 8.72  | 8.62  | 8.79  | 8.25  | 8.23  | 8.40  | 8.47  | 8.65  | 8.70  | 1.61                  |
| 3               | 230969_s_at    | BF691045       | LOC441428                             | 0.025505 | 6.59  | 6.55  | 6.55  | 8.54  | 8.08  | 9.08  | 6.41  | 6.26  | 6.81  | 5.88  | 5.75  | 5.95  | 5.68  | 5.93  | 5.96  | 6.12  | 6.03  | 6.74  | 2.53                  |
| 3               | 1564220_a_at   | AK096932       | ---                                   | 0.004253 | 5.91  | 6.01  | 5.91  | 6.71  | 6.58  | 6.80  | 5.90  | 6.00  | 6.14  | 5.76  | 5.65  | 5.75  | 5.59  | 5.54  | 5.81  | 5.72  | 5.67  | 5.68  | 1.88                  |
| 3               | 227345_at      | AI738556       | TNFRSF10D                             | 0.000078 | 8.76  | 9.17  | 9.10  | 10.11 | 10.22 | 9.81  | 8.36  | 8.84  | 8.79  | 7.33  | 7.28  | 7.22  | 7.51  | 7.49  | 7.49  | 8.44  | 8.41  | 8.68  | 2.72                  |
| 3               | 229879_at      | BF059124       | ASPH                                  | 0.003170 | 8.88  | 8.98  | 8.95  | 9.60  | 9.79  | 9.63  | 8.53  | 8.68  | 8.64  | 8.65  | 8.74  | 8.85  | 8.83  | 8.81  | 8.77  | 8.88  | 8.60  | 8.79  | 3.26                  |
| 3               | 218336_at      | NM_012394      | PFDN2                                 | 0.026388 | 9.27  | 9.53  | 9.42  | 10.30 | 10.14 | 10.18 | 9.41  | 9.25  | 9.28  | 9.54  | 9.54  | 9.67  | 9.25  | 9.26  | 9.23  | 9.70  | 9.43  | 8.92  | 3.47                  |
| 4               | 238025_at      | AA706818       | MLKL                                  | 0.037497 | 7.35  | 7.05  | 7.22  | 8.16  | 8.20  | 8.47  | 8.74  | 8.76  | 9.03  | 9.13  | 9.30  | 9.30  | 8.96  | 8.97  | 9.33  | 8.08  | 8.43  | 8.89  | 1.83                  |
| 4               | 202628_s_at    | NM_000602      | SERPINE1                              | 0.002967 | 8.72  | 9.09  | 9.18  | 9.68  | 9.34  | 9.53  | 10.23 | 10.37 | 10.51 | 11.01 | 10.98 | 11.29 | 10.73 | 10.71 | 11.16 | 10.32 | 10.51 | 10.24 | 1.22                  |
| 4               | 209536_s_at    | AF320070       | EHD4                                  | 0.000576 | 8.05  | 8.15  | 8.17  | 8.61  | 8.51  | 8.70  | 9.09  | 9.00  | 9.09  | 9.39  | 9.41  | 9.65  | 9.32  | 9.25  | 9.51  | 8.75  | 8.94  | 8.89  | 1.36                  |
| 4               | 202073_at      | AV757675       | OPTN                                  | 0.007793 | 6.87  | 6.88  | 6.93  | 7.56  | 7.57  | 7.88  | 8.23  | 8.06  | 8.52  | 9.01  | 9.23  | 9.16  | 8.72  | 8.71  | 9.32  | 7.92  | 7.94  | 8.33  | 1.57                  |
| 4               | 229074_at      | AI692267       | EHD4                                  | 0.039278 | 6.73  | 6.31  | 6.16  | 7.54  | 7.18  | 7.75  | 7.98  | 7.70  | 8.27  | 8.07  | 8.23  | 8.12  | 8.58  | 8.42  | 8.71  | 7.78  | 8.07  | 8.06  | 2.15                  |
| 4               | 35254_at       | AB007447       | TRAFD1                                | 0.008550 | 8.20  | 8.44  | 8.33  | 7.98  | 8.17  | 7.91  | 9.21  | 9.19  | 8.88  | 9.36  | 9.50  | 9.72  | 9.11  | 9.09  | 9.05  | 8.94  | 9.10  | 8.77  | 1.57                  |
| 4               | 1555491_a_at   | BC035817       | FLJ11286                              | 0.025359 | 6.76  | 6.56  | 6.58  | 6.36  | 6.57  | 6.23  | 8.21  | 8.06  | 7.34  | 8.64  | 8.65  | 9.31  | 8.35  | 8.47  | 8.21  | 7.94  | 7.76  | 7.51  | 1.58                  |
| 4               | 218429_s_at    | NM_018381      | FLJ11286                              | 0.004620 | 9.59  | 9.14  | 9.34  | 9.18  | 9.51  | 9.36  | 10.69 | 10.64 | 10.15 | 10.96 | 10.96 | 11.16 | 10.70 | 10.83 | 10.76 | 10.29 | 10.29 | 10.16 | 1.20                  |
| 4               | 228607_at      | AI651594       | OAS2                                  | 0.003572 | 7.53  | 7.36  | 7.19  | 7.44  | 7.61  | 7.43  | 8.64  | 8.63  | 8.57  | 9.17  | 9.46  | 10.02 | 8.80  | 8.87  | 8.69  | 8.39  | 8.35  | 8.53  | 1.31                  |
| 4               | 209498_at      | X16354         | CEACAM1                               | 0.000053 | 7.42  | 6.95  | 6.67  | 6.80  | 6.65  | 6.77  | 8.95  | 8.66  | 8.57  | 10.04 | 10.05 | 10.17 | 9.95  | 9.83  | 10.49 | 8.72  | 8.91  | 9.21  | 1.32                  |
| 4               | 204279_at      | NM_002800      | PSMB9                                 | 0.000000 | 6.59  | 6.63  | 6.57  | 6.70  | 6.49  | 6.60  | 9.13  | 9.04  | 8.72  | 10.37 | 10.30 | 10.53 | 9.62  | 9.53  | 9.97  | 9.03  | 9.29  | 9.44  | 1.02                  |
| 4               | 201649_at      | NM_004223      | UBE2L6                                | 0.000000 | 8.58  | 8.36  | 8.49  | 8.63  | 8.61  | 8.53  | 10.09 | 10.03 | 9.81  | 10.99 | 11.25 | 11.31 | 10.65 | 10.56 | 10.65 | 10.07 | 10.22 | 10.23 | 1.15                  |
| 4               | 204994_at      | NM_002463      | MX2                                   | 0.000010 | 7.43  | 7.20  | 7.44  | 7.21  | 7.60  | 7.53  | 8.56  | 8.53  | 8.55  | 9.47  | 9.45  | 9.51  | 9.23  | 9.20  | 9.29  | 8.51  | 8.50  | 8.82  | 1.18                  |
| 4               | 205569_at      | NM_014398      | LAMP3                                 | 0.008532 | 6.35  | 5.75  | 5.96  | 6.66  | 7.09  | 6.72  | 7.84  | 7.98  | 8.15  | 9.17  | 9.22  | 9.02  | 8.93  | 8.90  | 9.50  | 7.86  | 8.23  | 9.03  | 1.51                  |
| 4               | 218999_at      | NM_018295      | FLJ11000                              | 0.003698 | 7.22  | 7.13  | 7.00  | 7.24  | 7.54  | 7.46  | 8.63  | 8.30  | 8.24  | 8.42  | 8.18  | 8.30  | 8.13  | 8.18  | 8.32  | 8.26  | 8.34  | 8.36  | 1.58                  |
| 4               | 203882_at      | NM_006084      | ISGF3G                                | 0.000001 | 8.59  | 8.69  | 8.57  | 9.75  | 10.13 | 9.71  | 11.04 | 11.05 | 10.86 | 11.32 | 11.39 | 11.55 | 11.22 | 11.17 | 11.22 | 11.33 | 11.32 | 11.11 | 1.67                  |
| 4               | 203568_s_at    | NM_006355      | TRIM38                                | 0.045354 | 8.52  | 8.73  | 8.51  | 8.67  | 8.41  | 8.79  | 9.99  | 10.03 | 10.64 | 10.02 | 10.16 | 10.18 | 10.29 | 10.13 | 10.90 | 9.74  | 10.03 | 9.90  | 1.37                  |
| 4               | 203275_at      | NM_002199      | IRF2                                  | 0.024846 | 6.29  | 7.21  | 6.81  | 6.15  | 6.48  | 6.97  | 8.44  | 8.43  | 9.12  | 8.86  | 8.77  | 8.93  | 8.95  | 9.07  | 9.39  | 8.40  | 8.54  | 8.81  | 1.42                  |
| 4               | 213038_at      | AL031602       | IBRDC3                                | 0.016159 | 7.32  | 7.68  | 7.49  | 8.06  | 8.27  | 8.47  | 9.39  | 9.36  | 9.53  | 9.56  | 9.77  | 9.26  | 9.14  | 8.99  | 9.58  | 8.71  | 8.70  | 9.08  | 1.32                  |
| 4               | 204211_x_at    | NM_002759      | EIF2AK2                               | 0.001608 | 9.57  | 9.67  | 9.56  | 9.85  | 9.98  | 10.12 | 10.93 | 10.82 | 11.16 | 11.02 | 11.10 | 11.02 | 10.73 | 10.63 | 10.97 | 10.52 | 10.53 | 10.77 | 0.92                  |
| 4               | 203610_s_at    | AI363270       | TRIM38                                | 0.000492 | 7.30  | 7.65  | 7.49  | 7.41  | 7.24  | 7.72  | 9.64  | 9.33  | 9.30  | 9.46  | 9.45  | 9.66  | 9.56  | 9.72  | 9.70  | 9.27  | 9.11  | 8.63  | 1.16                  |
| 4               | 200887_s_at    | NM_007315      | STAT1                                 | 0.001710 | 10.84 | 10.84 | 11.01 | 11.30 | 11.44 | 11.70 | 12.34 | 12.44 | 12.83 | 12.81 | 12.87 | 12.92 | 12.57 | 12.56 | 12.95 | 12.40 | 12.55 | 12.71 | 1.12                  |
| 4               | 202446_s_at    | AI825926       | PLSCR1                                | 0.000015 | 8.35  | 8.60  | 8.61  | 9.21  | 9.67  | 9.74  | 11.19 | 11.19 | 11.67 | 11.80 | 11.85 | 12.21 | 11.68 | 11.81 | 12.11 | 11.69 | 11.67 | 11.66 | 1.27                  |
| 4               | 202863_at      | NM_003113      | SP100                                 | 0.000145 | 8.00  | 7.98  | 7.75  | 8.86  | 8.84  | 9.34  | 10.51 | 10.49 | 11.06 | 11.34 | 11.46 | 11.32 | 11.06 | 11.02 | 11.62 | 10.72 | 10.83 | 11.25 | 1.24                  |
| 4               | 202430_s_at    | NM_021105      | PLSCR1                                | 0.000208 | 6.91  | 7.15  | 6.90  | 8.02  | 8.29  | 8.83  | 9.81  | 9.78  | 10.58 | 10.59 | 10.71 | 10.59 | 10.43 | 10.46 | 10.93 | 10.39 | 10.45 | 10.45 | 1.49                  |
| 4               | 230036_at      | BE669858       | SAMD9L                                | 0.000005 | 6.23  | 6.08  | 6.27  | 6.65  | 6.68  | 6.87  | 8.72  | 8.86  | 9.15  | 9.56  | 9.50  | 9.31  | 9.43  | 9.48  | 9.99  | 8.48  | 8.76  | 8.96  | 0.92                  |
| 4               | 235643_at      | BE886225       |                                       |          |       |       |       |       |       |       |       |       |       |       |       |       |       |       |       |       |       |       |                       |

| K-Mean<br>Order | Probe<br>Names | Gene<br>Symbol | Adj. p-Value<br>≤0.05,<br>Bonferroni | K-Means<br>Similarity |       |       |       |       |       |       |       |       |       |       |       |       |       |       |       |       |       |            |      |
|-----------------|----------------|----------------|--------------------------------------|-----------------------|-------|-------|-------|-------|-------|-------|-------|-------|-------|-------|-------|-------|-------|-------|-------|-------|-------|------------|------|
|                 |                |                |                                      | c1                    | c2    | c3    | 6h1   | 6h2   | 6h3   | 12h1  | 12h2  | 12h3  | 24h1  | 24h2  | 24h3  | 48h1  | 48h2  | 48h3  | 72h1  | 72h2  | 72h3  | Similarity |      |
| 4               | 219716_at      | NM_030641      | APOL6                                | 0.000039              | 7.46  | 7.51  | 7.73  | 7.66  | 7.87  | 8.09  | 9.72  | 9.49  | 9.77  | 10.03 | 10.02 | 10.30 | 9.64  | 9.59  | 9.97  | 9.28  | 9.29  | 9.56       | 0.54 |
| 4               | 226474_at      | AA005023       | NOD27                                | 0.000000              | 6.91  | 6.76  | 6.89  | 6.98  | 7.23  | 7.13  | 9.42  | 9.34  | 9.21  | 10.02 | 10.13 | 10.41 | 9.53  | 9.58  | 9.64  | 8.79  | 8.96  | 9.26       | 0.58 |
| 4               | 209761_s_at    | AA969194       | SP110                                | 0.000003              | 7.11  | 7.37  | 7.28  | 7.91  | 7.85  | 7.49  | 10.53 | 10.43 | 10.80 | 11.00 | 11.02 | 11.35 | 10.56 | 10.52 | 10.88 | 10.12 | 10.48 | 9.86       | 0.71 |
| 4               | 204804_at      | NM_003141      | TRIM21                               | 0.000004              | 8.25  | 8.42  | 8.30  | 8.39  | 8.47  | 8.28  | 10.37 | 10.21 | 10.35 | 10.53 | 10.43 | 10.62 | 10.10 | 10.10 | 10.57 | 9.88  | 9.97  | 9.86       | 0.65 |
| 4               | 208392_x_at    | NM_004510      | SP110                                | 0.000011              | 7.62  | 7.81  | 7.71  | 7.86  | 7.97  | 7.80  | 9.50  | 9.24  | 9.46  | 9.58  | 9.71  | 9.82  | 9.39  | 9.44  | 9.76  | 9.08  | 9.12  | 8.96       | 0.57 |
| 4               | 234987_at      | AV715309       | C20orf118                            | 0.000000              | 5.32  | 5.45  | 5.31  | 5.81  | 5.67  | 5.35  | 8.94  | 9.11  | 9.38  | 9.72  | 9.85  | 9.72  | 9.28  | 9.02  | 9.68  | 8.17  | 8.45  | 8.28       | 0.56 |
| 4               | 223980_s_at    | AF280095       | SP110                                | 0.000048              | 7.88  | 7.66  | 7.38  | 7.64  | 7.84  | 7.81  | 10.01 | 9.74  | 10.28 | 10.09 | 10.22 | 10.35 | 9.70  | 9.74  | 10.13 | 9.40  | 9.46  | 9.39       | 0.66 |
| 4               | 214329_x_at    | AW744434       | TNFSF10                              | 0.000624              | 4.91  | 4.78  | 4.90  | 4.68  | 4.54  | 4.78  | 9.61  | 8.76  | 10.17 | 9.89  | 9.83  | 10.16 | 9.75  | 9.15  | 10.68 | 7.80  | 8.69  | 9.13       | 0.85 |
| 4               | 223298_s_at    | AF312735       | NT5C3                                | 0.000736              | 9.95  | 10.22 | 9.96  | 9.89  | 9.56  | 10.09 | 11.90 | 11.53 | 11.96 | 12.24 | 12.00 | 12.28 | 11.84 | 11.83 | 12.39 | 11.65 | 11.69 | 11.50      | 1.01 |
| 4               | 230000_at      | AI523817       | C17orf27                             | 0.025547              | 9.32  | 9.95  | 9.50  | 9.47  | 8.92  | 9.59  | 11.74 | 11.52 | 12.16 | 11.52 | 11.63 | 11.88 | 10.97 | 10.90 | 11.53 | 10.59 | 11.02 | 11.08      | 1.37 |
| 4               | 226961_at      | AI347918       | LOC222171                            | 0.001742              | 7.12  | 7.52  | 7.29  | 6.78  | 7.23  | 7.05  | 9.12  | 8.71  | 9.23  | 8.88  | 9.01  | 9.09  | 8.69  | 8.71  | 8.96  | 8.17  | 8.28  | 8.57       | 1.13 |
| 4               | 225415_at      | AA577672       | DTX3L                                | 0.000005              | 8.39  | 8.66  | 8.57  | 9.10  | 9.44  | 9.35  | 10.97 | 11.06 | 11.35 | 11.27 | 11.37 | 11.31 | 11.32 | 11.28 | 11.33 | 11.19 | 11.21 | 11.70      | 1.41 |
| 4               | 203153_at      | NM_001548      | IFIT1                                | 0.000000              | 6.37  | 6.62  | 6.48  | 7.34  | 8.33  | 8.02  | 12.64 | 12.52 | 13.02 | 12.72 | 12.74 | 12.99 | 12.66 | 12.61 | 12.98 | 12.70 | 12.69 | 12.83      | 1.23 |
| 4               | 205552_s_at    | NM_002534      | OAS1                                 | 0.000344              | 6.34  | 6.34  | 6.43  | 6.41  | 7.07  | 6.34  | 9.88  | 9.67  | 8.83  | 10.37 | 10.61 | 11.03 | 10.22 | 10.29 | 10.14 | 9.89  | 9.93  | 9.09       | 1.20 |
| 4               | 202869_at      | NM_016816      | OAS1                                 | 0.000000              | 7.66  | 7.31  | 7.47  | 8.19  | 8.66  | 8.22  | 11.04 | 10.83 | 10.77 | 11.34 | 11.36 | 11.68 | 11.11 | 11.12 | 11.21 | 10.60 | 10.71 | 10.61      | 0.85 |
| 4               | 202086_at      | NM_002462      | MX1                                  | 0.000000              | 7.80  | 7.73  | 7.66  | 8.06  | 8.44  | 8.21  | 11.63 | 11.71 | 11.09 | 12.28 | 12.40 | 12.64 | 11.81 | 11.78 | 12.01 | 11.62 | 11.52 | 11.50      | 0.92 |
| 4               | 225973_at      | AA573502       | TAP2                                 | 0.000082              | 6.85  | 7.44  | 7.40  | 7.16  | 7.24  | 7.47  | 9.52  | 9.45  | 9.87  | 10.36 | 10.65 | 10.70 | 10.04 | 10.02 | 10.44 | 9.15  | 9.47  | 9.82       | 0.76 |
| 4               | 219211_at      | NM_017414      | USP18                                | 0.000000              | 6.64  | 6.99  | 7.11  | 7.19  | 7.41  | 7.41  | 9.99  | 9.99  | 10.15 | 10.49 | 10.64 | 10.91 | 10.30 | 10.26 | 10.56 | 10.15 | 10.37 | 10.26      | 1.02 |
| 4               | 223220_s_at    | AF307338       | PARP9                                | 0.000010              | 6.15  | 6.89  | 6.56  | 6.60  | 7.08  | 7.09  | 9.84  | 9.61  | 9.98  | 10.30 | 10.31 | 10.82 | 10.23 | 10.11 | 10.59 | 9.86  | 9.92  | 9.94       | 0.96 |
| 4               | 211889_x_at    | D12502         | CEACAM1                              | 0.022241              | 5.79  | 6.33  | 6.14  | 5.88  | 6.01  | 5.87  | 6.84  | 6.55  | 6.23  | 7.67  | 7.39  | 7.94  | 7.52  | 7.60  | 7.80  | 6.52  | 6.63  | 6.65       | 2.31 |
| 4               | 203973_s_at    | NM_005195      | CEBPD                                | 0.000938              | 9.54  | 9.92  | 9.75  | 8.64  | 8.30  | 8.25  | 10.20 | 9.98  | 9.98  | 10.39 | 10.21 | 10.29 | 10.24 | 10.10 | 10.02 | 9.72  | 9.76  | 9.93       | 3.03 |
| 4               | 36564_at       | W27419         | IBRD3C3                              | 0.040295              | 8.62  | 8.90  | 8.53  | 8.08  | 9.12  | 9.01  | 9.90  | 9.99  | 10.22 | 10.00 | 10.05 | 9.62  | 9.56  | 9.58  | 9.81  | 9.31  | 9.21  | 9.31       | 1.84 |
| 4               | 1559882_at     | AF147427       | SAMHD1                               | 0.007564              | 5.26  | 5.27  | 5.04  | 5.53  | 5.51  | 5.43  | 6.50  | 6.48  | 6.59  | 6.13  | 6.44  | 6.05  | 6.27  | 6.51  | 6.41  | 5.68  | 5.96  | 6.02       | 1.75 |
| 4               | 225636_at      | H98105         | STAT2                                | 0.000521              | 8.11  | 8.69  | 8.50  | 8.36  | 8.89  | 8.63  | 10.97 | 10.85 | 10.93 | 11.17 | 11.24 | 11.53 | 10.33 | 10.43 | 10.42 | 9.59  | 9.71  | 10.32      | 1.00 |
| 4               | 213294_at      | AV755522       | CCDC75                               | 0.001645              | 10.13 | 10.50 | 10.65 | 10.46 | 10.62 | 10.73 | 11.90 | 11.98 | 12.26 | 12.04 | 12.23 | 12.35 | 11.48 | 11.47 | 11.65 | 11.24 | 11.20 | 11.31      | 1.30 |
| 4               | 209124_at      | U70451         | MYD88                                | 0.000527              | 9.28  | 9.49  | 9.59  | 9.06  | 9.44  | 9.41  | 11.11 | 11.05 | 11.15 | 11.32 | 11.40 | 11.80 | 10.70 | 10.70 | 11.09 | 10.26 | 10.35 | 10.50      | 1.00 |
| 4               | 206271_at      | NM_003265      | TLR3                                 | 0.000911              | 5.80  | 5.80  | 5.84  | 5.82  | 5.83  | 6.11  | 7.98  | 7.81  | 8.27  | 8.68  | 8.61  | 9.02  | 7.69  | 7.54  | 8.40  | 7.00  | 7.12  | 7.46       | 0.80 |
| 4               | 235292_at      | BE875232       | ---                                  | 0.000001              | 5.88  | 5.87  | 5.76  | 6.08  | 5.80  | 5.95  | 7.24  | 7.24  | 7.40  | 8.19  | 8.06  | 8.04  | 7.00  | 6.99  | 7.10  | 6.40  | 6.47  | 6.69       | 1.52 |
| 4               | 235987_at      | AI686890       | ---                                  | 0.000109              | 4.88  | 4.95  | 4.98  | 4.98  | 5.04  | 5.01  | 6.63  | 6.77  | 7.22  | 7.71  | 7.73  | 7.75  | 6.58  | 6.47  | 6.96  | 5.57  | 5.78  | 6.11       | 1.27 |
| 4               | 223192_at      | AF267854       | SLC25A28                             | 0.014596              | 8.10  | 8.25  | 8.40  | 8.26  | 8.43  | 8.04  | 9.32  | 9.35  | 9.14  | 9.67  | 9.72  | 9.81  | 8.99  | 9.06  | 9.44  | 8.53  | 8.56  | 8.76       | 1.68 |
| 4               | 1557116_at     | BM980001       | APOL6                                | 0.010643              | 8.15  | 8.30  | 8.32  | 7.78  | 8.00  | 8.13  | 9.01  | 9.08  | 8.77  | 9.19  | 9.34  | 9.38  | 8.84  | 8.93  | 8.99  | 8.52  | 8.51  | 8.79       | 1.56 |
| 4               | 210785_s_at    | AB035482       | C1orf38                              | 0.001924              | 5.96  | 6.03  | 6.09  | 5.99  | 6.25  | 5.82  | 7.96  | 7.88  | 7.40  | 7.93  | 7.94  | 8.17  | 7.44  | 7.47  | 7.30  | 7.04  | 7.44  | 6.97       | 1.21 |
| 4               | 207571_x_at    | NM_004848      | C1orf38                              | 0.009644              | 6.45  | 6.35  | 6.17  | 6.12  | 6.56  | 6.47  | 7.87  | 7.53  | 7.44  | 7.77  | 7.73  | 7.76  | 7.32  | 7.30  | 7.19  | 6.86  | 7.15  | 6.97       | 1.37 |
| 4               | 232375_at      | AI539443       | STAT1                                | 0.034054              | 7.51  | 7.67  | 7.68  | 7.92  | 8.04  | 8.45  | 10.32 | 10.34 | 11.19 | 9.51  | 10.32 | 10.42 | 9.47  | 9.71  | 10.19 | 8.62  | 8.82  | 8.91       | 1.72 |
| 4               | 230314_at      | AW014557       | LOC440424                            | 0.022885              | 6.22  | 6.40  | 6.46  | 6.49  | 6.50  | 7.02  | 8.81  | 8.51  | 9.00  | 8.29  | 8.38  | 8.87  | 7.66  | 7.78  | 8.23  | 6.91  | 7.08  | 7.58       | 1.74 |
| 4               | 225291_at      | AI967971       | PNPT1                                | 0.000579              | 9.47  | 9.73  | 9.88  | 10.21 | 10.12 | 10.52 | 11.57 | 11.69 | 11.99 | 12.00 | 11.96 | 12.15 | 11.16 | 11.13 | 11.50 | 10.45 | 10.48 | 10.73      | 1.54 |
| 4               | 212044_s_at    | NM_021616      | TRIM34 /// TRIM6-TRIM34              | 0.017531              | 7.45  | 7.25  | 7.24  | 7.27  | 7.25  | 7.49  | 8.85  | 8.74  | 9.26  | 8.87  | 8.82  | 8.86  | 8.00  | 8.01  | 8.43  | 7.23  | 7.32  | 7.82       | 2.35 |
| 4               | 214255_at      | N35112         | ATP10A                               | 0.022039              | 7.96  | 7.73  | 7.71  | 7.90  | 8.03  | 7.97  | 8.33  | 8.33  | 8.35  | 8.64  | 8.68  | 8.78  | 8.38  | 8.19  | 8.33  | 7.97  | 7.82  | 8.06       | 2.23 |
| 4               | 231956_at      | AA976354       | KIAA1618                             | 0.014004              | 8.64  | 8.90  | 9.18  | 8.23  | 7.23  | 7.92  | 10.89 | 10.98 | 11.51 | 9.96  | 10.66 | 10.49 | 9.53  | 9.15  | 9.58  | 8.34  | 8.36  | 8.76       | 3.09 |
| 4               | 232645_at      | AW665885       | LOC153684                            | 0.007089              | 7.85  | 7.78  | 7.74  | 7.60  | 7.74  | 7.63  | 8.29  | 8.27  | 8.16  | 8.05  | 7.95  | 8.11  | 7.89  | 7.96  | 8.06  | 7.55  | 7.56  | 7.53       | 3.62 |
| 4               | 213418_at      | NM_002155      | HSPA6                                | 0.004638              | 6.68  | 6.56  | 6.64  | 6.52  | 6.66  | 6.62  | 6.82  | 6.90  | 6.80  | 8.21  | 8.15  | 8.04  | 7.30  | 7.22  | 7.42  | 7.27  | 7.16  | 6.69       | 2.80 |
| 4               | 205379_at      | NM_001236      | CBR3                                 | 0.027807              | 8.22  | 8.39  | 8.38  | 8.09  | 8.23  | 7.93  | 8.90  | 8.67  | 8.58  | 9.27  | 9.15  | 9.33  | 8.26  | 8.23  | 8.44  | 7.85  | 8.10  | 8.18       | 3.53 |
| 4               | 221827_at      | BE788439       | C20orf18                             | 0.000005              | 10.81 | 10.88 | 10.96 | 11.84 | 11.87 | 11.74 | 11.84 | 11.87 | 11.91 | 12.33 | 12.39 | 12.31 | 11.89 | 11.87 | 11.93 | 11.89 | 11.69 | 11.70      | 2.64 |
| 5               | 213241_at      | AF035307       | PLXNC1                               | 0.003493              | 4.96  | 4.98  | 4.90  | 4.96  | 4.96  | 5.08  | 5.08  | 4.98  | 5.07  | 5.30  | 5.37  | 5.51  | 5.97  | 6.01  | 6.37  | 5.52  | 5.52  | 5.52       | 1.43 |
| 5               | 209829_at      | AB002384       | C6orf32                              | 0.004819              | 4.66  | 4.70  | 4.90  | 4.46  | 4.75  | 4.64  | 4.69  | 4.85  | 4.75  | 5.91  | 5.64  | 5.92  | 8.08  | 8.28  | 9.42  | 6.39  | 6.60  | 7.49       | 1.24 |
| 5               | 236982_at      | BE467566       | PTTG1IP                              | 0.004239              | 5.70  | 5.86  | 5.89  | 5.75  | 5.69  | 5.78  | 6.08  | 6.03  | 6.18  | 6.42  | 6.15  | 6.20  | 8.38  | 8.11  | 8.69  | 6.73  | 6.94  | 7.70       | 1.52 |
| 5               | 210004_at      | AF035776       | OLR1                                 | 0.000000              | 4.58  | 4.57  | 4.72  | 4.78  | 4.68  | 4.61  | 4.70  | 4.69  | 4.72  | 4.91  | 4.87  | 4.96  | 6.84  | 6.77  | 7.03  | 5.84  | 5.83  | 6.13       | 1.37 |
| 5               | 208182_x_at    | NM_002172      | IFNA14                               | 0.000112              | 6.53  | 6.03  | 5.97  | 6.15  | 6.17  | 6.47  | 6.49  | 6.63  | 6.50  | 7.01  | 7.17  | 6.91  | 9.20  | 9.29  | 9.71  | 7.09  | 7.56  | 7.32       | 1.84 |
| 5               | 208448_x_at    | NM_002173      | IFNA16                               | 0.000011              | 5.83  | 5.75  | 5.73  | 5.81  | 5.93  | 5.93  | 5.82  | 5.87  | 5.81  | 6.87  | 6.67  | 6.57  | 9.10  | 9.32  | 9.87  | 6.68  | 7.02  | 7.17       | 1.88 |
| 5               | 208375_at      | NM_024013      | IFNA1                                | 0.000471              | 4.82  | 4.68  | 4.71  | 4.89  | 4.98  | 4.63  | 4.91  | 4.75  | 4.62  | 5.39  | 5.16  | 5.18  | 6.45  | 6.75  | 6.95  | 5.15  | 5.10  | 5.11       | 2.43 |
| 5               | 211338_at      | MS4886         | IFNA2                                | 0.000098              | 4.93  | 4.86  | 4.93  | 4.91  | 4.96  | 5.10  | 4.93  | 4.93  | 4.84  | 5.18  | 5.10  | 5.06  | 6.16  | 6.34  | 6.56  | 5.22  | 5.24  | 5.21       |      |

| K-Mean<br>Order | Probe<br>Names | GBiD      | Gene<br>Symbol | Adj. p-Value<br>≤0.05, |       |       |       |       |       |       |       |       |       |       |       |       |       |       |       |       |       |       | K-Means<br>Similarity |
|-----------------|----------------|-----------|----------------|------------------------|-------|-------|-------|-------|-------|-------|-------|-------|-------|-------|-------|-------|-------|-------|-------|-------|-------|-------|-----------------------|
|                 |                |           |                | Bonferroni             | c1    | c2    | c3    | 6h1   | 6h2   | 6h3   | 12h1  | 12h2  | 12h3  | 24h1  | 24h2  | 24h3  | 48h1  | 48h2  | 48h3  | 72h1  | 72h2  | 72h3  |                       |
| 5               | 206707_x_at    | NM_015864 | C6orf32        | 0.000656               | 7.52  | 7.07  | 7.24  | 7.29  | 7.18  | 7.23  | 7.59  | 7.66  | 7.46  | 8.46  | 8.33  | 7.97  | 9.47  | 9.47  | 9.66  | 8.62  | 9.22  | 9.05  | 0.82                  |
| 5               | 235742_at      | AI436197  | MOV10          | 0.000112               | 6.64  | 6.48  | 6.37  | 6.81  | 6.64  | 6.78  | 6.96  | 6.94  | 6.55  | 7.47  | 7.46  | 7.49  | 8.30  | 8.63  | 8.64  | 8.19  | 8.18  | 8.45  | 0.92                  |
| 5               | 217767_at      | NM_000064 | C3             | 0.000801               | 8.55  | 8.44  | 8.52  | 8.55  | 8.48  | 8.24  | 8.81  | 8.62  | 8.61  | 9.15  | 9.21  | 9.23  | 10.16 | 10.25 | 10.64 | 9.93  | 9.95  | 10.43 | 0.81                  |
| 5               | 212621_at      | AB006624  | KIAA0286       | 0.034188               | 7.75  | 8.43  | 8.44  | 7.58  | 7.60  | 7.80  | 7.85  | 8.02  | 8.35  | 8.59  | 8.52  | 8.70  | 9.96  | 10.07 | 10.47 | 9.21  | 9.76  | 10.10 | 1.20                  |
| 5               | 205281_s_at    | NM_002641 | PIGA           | 0.000852               | 6.79  | 7.01  | 7.03  | 7.04  | 6.88  | 7.31  | 6.88  | 7.04  | 7.65  | 7.99  | 7.96  | 7.73  | 9.11  | 9.19  | 9.55  | 9.10  | 9.20  | 9.26  | 1.04                  |
| 5               | 214985_at      | AF070571  | ---            | 0.001987               | 6.07  | 6.03  | 5.41  | 6.21  | 6.09  | 6.05  | 6.51  | 6.33  | 6.77  | 7.11  | 6.93  | 6.74  | 9.37  | 8.58  | 9.23  | 8.37  | 8.93  | 9.32  | 1.24                  |
| 5               | 210118_s_at    | M15329    | IL1A           | 0.000002               | 7.14  | 6.87  | 6.50  | 6.86  | 6.92  | 6.97  | 7.13  | 7.06  | 7.28  | 7.69  | 7.77  | 7.72  | 9.40  | 9.53  | 9.59  | 9.07  | 9.20  | 9.22  | 0.83                  |
| 5               | 1557557_at     | BE675718  | MATN1          | 0.000100               | 5.17  | 5.47  | 5.42  | 5.20  | 5.44  | 5.10  | 5.85  | 5.85  | 5.41  | 6.73  | 6.34  | 6.93  | 8.01  | 8.08  | 7.67  | 8.02  | 7.93  | 8.36  | 1.06                  |
| 5               | 209785_s_at    | AF065214  | PLA2G4C        | 0.000082               | 6.25  | 6.06  | 5.89  | 6.43  | 6.32  | 6.12  | 6.67  | 6.62  | 6.24  | 7.54  | 7.80  | 7.96  | 8.94  | 9.08  | 8.78  | 8.67  | 8.98  | 9.45  | 1.10                  |
| 5               | 213497_at      | AL050374  | ABTB2          | 0.000008               | 8.25  | 8.36  | 8.49  | 8.19  | 8.23  | 7.97  | 8.39  | 8.46  | 8.25  | 8.87  | 8.95  | 8.91  | 9.78  | 9.68  | 9.85  | 9.88  | 9.99  | 9.73  | 1.03                  |
| 5               | 201207_at      | NM_021137 | TNFAIP1        | 0.000001               | 9.44  | 9.53  | 9.54  | 9.40  | 9.52  | 9.34  | 9.65  | 9.65  | 9.59  | 9.80  | 9.92  | 10.01 | 10.68 | 10.66 | 10.67 | 10.64 | 10.74 | 10.74 | 0.93                  |
| 5               | 209239_at      | M55643    | NFKB1          | 0.000395               | 8.82  | 8.73  | 8.56  | 8.41  | 8.46  | 8.26  | 8.85  | 9.00  | 8.75  | 9.61  | 9.60  | 9.68  | 11.26 | 10.77 | 10.75 | 11.06 | 11.23 | 10.43 | 1.06                  |
| 5               | 219554_at      | NM_016321 | RHCG           | 0.000009               | 7.44  | 7.26  | 7.63  | 7.26  | 7.54  | 7.35  | 7.81  | 7.85  | 7.65  | 8.67  | 8.82  | 8.70  | 10.03 | 10.13 | 9.72  | 10.30 | 10.45 | 9.89  | 1.10                  |
| 5               | 211685_s_at    | AF251061  | NCALD          | 0.000011               | 7.45  | 7.27  | 7.19  | 7.01  | 7.20  | 6.92  | 7.42  | 7.46  | 7.35  | 8.04  | 8.20  | 8.26  | 9.14  | 9.18  | 8.79  | 9.15  | 9.04  | 9.03  | 0.97                  |
| 5               | 221291_at      | NM_025217 | ULBP2          | 0.045755               | 7.94  | 7.64  | 7.81  | 7.73  | 7.78  | 7.74  | 7.74  | 7.98  | 7.76  | 8.12  | 8.29  | 8.38  | 8.56  | 8.62  | 8.51  | 8.70  | 8.69  | 8.42  | 1.46                  |
| 5               | 211792_s_at    | U17074    | CDKN2C         | 0.018999               | 8.28  | 8.51  | 8.57  | 8.01  | 7.91  | 7.83  | 8.22  | 8.19  | 8.09  | 8.48  | 8.55  | 8.53  | 8.98  | 9.00  | 8.84  | 9.16  | 9.19  | 8.81  | 2.04                  |
| 5               | 225968_at      | BG285881  | PRICKLE2       | 0.011859               | 8.45  | 8.74  | 8.67  | 7.81  | 7.59  | 7.76  | 8.10  | 8.11  | 8.26  | 8.47  | 8.58  | 8.45  | 8.94  | 8.83  | 9.08  | 8.75  | 8.71  | 9.02  | 2.65                  |
| 5               | 228188_at      | AI860150  | FOSL2          | 0.010609               | 9.04  | 9.08  | 9.17  | 8.33  | 8.37  | 8.30  | 8.97  | 8.75  | 8.92  | 9.19  | 9.15  | 9.01  | 9.54  | 9.21  | 9.50  | 9.20  | 9.28  | 9.26  | 2.74                  |
| 5               | 201341_at      | NM_003633 | ENC1           | 0.006410               | 9.39  | 9.80  | 9.81  | 8.93  | 9.10  | 8.86  | 9.80  | 9.76  | 9.76  | 9.92  | 10.04 | 10.29 | 10.49 | 10.61 | 10.52 | 10.34 | 10.20 | 10.23 | 1.98                  |
| 5               | 221122_at      | NM_017878 | HRASLS2        | 0.002117               | 7.29  | 7.34  | 7.06  | 7.36  | 7.45  | 7.33  | 7.56  | 7.19  | 7.30  | 8.21  | 8.11  | 7.94  | 8.44  | 8.44  | 8.36  | 8.20  | 8.19  | 8.13  | 1.50                  |
| 5               | 201703_s_at    | NM_002714 | PPP1R10        | 0.019456               | 8.27  | 8.65  | 8.58  | 8.15  | 7.77  | 7.53  | 8.38  | 8.42  | 8.29  | 9.11  | 9.06  | 9.15  | 9.62  | 9.69  | 9.83  | 10.17 | 9.97  | 9.41  | 1.63                  |
| 5               | 224927_at      | BG251556  | KIAA1949       | 0.001523               | 8.44  | 8.74  | 8.71  | 8.39  | 8.41  | 8.28  | 8.60  | 8.73  | 8.41  | 9.20  | 9.27  | 9.15  | 9.65  | 9.80  | 9.66  | 9.81  | 9.72  | 9.44  | 1.18                  |
| 5               | 225077_at      | AA890703  | LOC283680      | 0.000460               | 7.88  | 8.79  | 8.62  | 7.77  | 7.87  | 7.31  | 8.17  | 8.45  | 8.19  | 9.29  | 9.57  | 9.51  | 10.41 | 10.48 | 10.52 | 10.76 | 10.59 | 10.63 | 1.28                  |
| 5               | 208961_s_at    | AB017493  | KLIF6          | 0.000572               | 8.04  | 8.43  | 8.20  | 7.90  | 7.86  | 7.47  | 8.91  | 8.99  | 8.42  | 9.36  | 9.58  | 9.58  | 10.98 | 10.65 | 10.42 | 10.84 | 11.11 | 10.40 | 1.22                  |
| 5               | 38918_at       | AF083105  | SOX13          | 0.004370               | 7.11  | 7.28  | 7.25  | 7.01  | 7.23  | 6.51  | 7.48  | 7.64  | 7.58  | 7.99  | 8.02  | 8.01  | 8.84  | 8.86  | 8.47  | 8.81  | 8.64  | 8.63  | 1.26                  |
| 5               | 231963_at      | BG111938  | ---            | 0.006648               | 7.50  | 7.64  | 7.61  | 7.54  | 7.62  | 7.14  | 8.18  | 8.05  | 8.07  | 8.59  | 8.58  | 8.69  | 9.44  | 9.56  | 9.31  | 9.71  | 9.27  | 8.84  | 1.23                  |
| 5               | 215313_x_at    | AA573862  | HLA-A          | 0.005930               | 10.64 | 11.11 | 11.08 | 10.58 | 10.84 | 10.09 | 11.50 | 11.48 | 10.95 | 11.99 | 12.17 | 12.09 | 12.66 | 12.71 | 12.50 | 13.11 | 12.94 | 12.76 | 1.58                  |
| 5               | 1570253_a_at   | BC014155  | RHEBL1         | 0.000118               | 5.85  | 5.64  | 5.67  | 5.68  | 5.59  | 5.57  | 6.43  | 6.51  | 5.89  | 7.80  | 7.78  | 7.92  | 8.68  | 9.05  | 8.29  | 9.07  | 9.07  | 8.41  | 1.31                  |
| 5               | 225468_at      | AI761804  | FLJ36874       | 0.031745               | 7.94  | 8.78  | 8.99  | 8.58  | 8.42  | 8.64  | 8.62  | 8.77  | 8.64  | 9.46  | 9.51  | 10.09 | 10.60 | 10.75 | 10.71 | 10.85 | 10.71 | 10.31 | 1.22                  |
| 5               | 214543_x_at    | AF142421  | QKI            | 0.018536               | 8.46  | 8.55  | 8.66  | 8.35  | 8.39  | 8.26  | 8.47  | 8.63  | 8.57  | 8.86  | 8.65  | 8.79  | 9.33  | 9.44  | 9.39  | 9.17  | 9.33  | 8.93  | 1.20                  |
| 5               | 201783_s_at    | NM_021975 | RELA           | 0.000054               | 9.69  | 9.96  | 9.78  | 9.71  | 9.74  | 9.46  | 9.81  | 9.79  | 9.76  | 10.37 | 10.47 | 10.32 | 11.00 | 11.07 | 11.25 | 10.86 | 10.90 | 10.89 | 0.71                  |
| 5               | 226029_at      | AB033041  | VANGL2         | 0.000016               | 6.80  | 7.15  | 6.99  | 6.68  | 6.85  | 6.18  | 6.91  | 7.00  | 7.14  | 7.80  | 7.83  | 7.87  | 9.16  | 9.21  | 9.32  | 8.98  | 9.11  | 9.02  | 0.75                  |
| 5               | 215043_s_at    | X83301    | SMA3 /// SMA5  | 0.000696               | 5.09  | 5.10  | 5.04  | 5.04  | 4.85  | 4.60  | 5.14  | 5.18  | 5.16  | 5.50  | 5.49  | 5.18  | 6.34  | 6.26  | 6.44  | 6.22  | 6.34  | 6.09  | 1.08                  |
| 5               | 204090_at      | NM_004197 | STK19          | 0.007819               | 8.81  | 8.93  | 8.81  | 8.67  | 8.68  | 8.43  | 8.99  | 9.07  | 8.76  | 9.29  | 9.51  | 9.75  | 10.39 | 10.77 | 10.33 | 10.56 | 10.47 | 9.97  | 1.07                  |
| 5               | 36019_at       | L26260    | STK19          | 0.023166               | 8.87  | 8.96  | 8.97  | 8.85  | 8.94  | 8.40  | 9.05  | 9.07  | 8.76  | 9.33  | 9.37  | 9.46  | 10.24 | 10.52 | 10.14 | 10.13 | 10.13 | 9.78  | 1.10                  |
| 5               | 208989_s_at    | AF179221  | FBXL11         | 0.021790               | 8.55  | 8.66  | 8.72  | 8.51  | 8.63  | 8.38  | 8.61  | 8.78  | 8.79  | 9.21  | 9.26  | 9.23  | 9.51  | 9.55  | 9.70  | 9.57  | 9.66  | 9.19  | 1.25                  |
| 5               | 202023_at      | NM_004428 | EFNA1          | 0.000006               | 7.20  | 7.48  | 7.62  | 6.84  | 7.04  | 6.42  | 7.77  | 8.00  | 7.98  | 9.15  | 9.15  | 9.23  | 10.09 | 10.12 | 10.41 | 9.48  | 9.65  | 9.75  | 1.09                  |
| 5               | 233076_at      | AL137551  | C10orf39       | 0.028016               | 6.74  | 7.28  | 7.27  | 7.00  | 7.24  | 7.05  | 7.34  | 7.28  | 7.70  | 7.93  | 8.08  | 8.33  | 8.78  | 9.09  | 9.20  | 8.47  | 8.96  | 9.18  | 1.05                  |
| 5               | 202902_s_at    | NM_004079 | CTSS           | 0.000084               | 7.38  | 7.41  | 7.67  | 7.50  | 7.53  | 7.64  | 8.01  | 7.97  | 7.64  | 8.57  | 8.57  | 8.78  | 9.58  | 9.71  | 9.31  | 8.98  | 9.00  | 9.10  | 0.90                  |
| 5               | 204948_s_at    | NM_013409 | FST            | 0.013639               | 7.94  | 8.07  | 8.23  | 8.10  | 7.89  | 8.13  | 8.30  | 8.37  | 8.45  | 9.14  | 9.05  | 8.97  | 9.94  | 9.55  | 9.31  | 9.15  | 9.21  | 9.55  | 1.27                  |
| 5               | 221477_s_at    | BF575213  | MGC5618        | 0.007518               | 7.72  | 7.94  | 8.15  | 7.30  | 7.77  | 7.71  | 8.31  | 8.69  | 8.62  | 9.28  | 9.49  | 8.91  | 10.48 | 10.18 | 9.61  | 9.96  | 9.94  | 9.90  | 1.35                  |
| 5               | 1554810_at     | BC017956  | PLA2G4C        | 0.001419               | 6.37  | 6.21  | 6.37  | 6.30  | 6.54  | 6.43  | 6.72  | 6.66  | 6.94  | 7.23  | 7.88  | 7.25  | 8.63  | 8.23  | 8.54  | 8.00  | 8.20  | 7.98  | 0.95                  |
| 5               | 226459_at      | AW575754  | PIK3AP1        | 0.000089               | 7.56  | 7.63  | 8.08  | 7.40  | 7.77  | 7.94  | 7.98  | 8.09  | 8.60  | 9.50  | 9.41  | 9.44  | 10.61 | 10.45 | 10.87 | 10.27 | 10.43 | 10.46 | 0.87                  |
| 5               | 226542_at      | AI300571  | ---            | 0.000038               | 7.64  | 7.60  | 7.69  | 7.57  | 7.78  | 7.68  | 7.79  | 7.91  | 7.83  | 8.24  | 8.26  | 8.48  | 8.79  | 8.83  | 8.68  | 8.71  | 8.77  | 8.74  | 0.98                  |
| 5               | 238967_at      | AI924046  | CLDN1          | 0.000223               | 7.88  | 7.97  | 8.08  | 7.81  | 7.66  | 7.79  | 8.07  | 8.07  | 8.24  | 8.48  | 8.60  | 8.65  | 9.26  | 9.10  | 9.60  | 9.44  | 9.32  | 9.34  | 1.02                  |
| 5               | 202702_at      | NM_003449 | TRIM26         | 0.000063               | 9.24  | 9.08  | 8.79  | 8.90  | 9.20  | 8.92  | 9.71  | 9.85  | 9.49  | 10.11 | 10.28 | 10.13 | 10.91 | 11.02 | 10.98 | 10.78 | 10.87 | 10.76 | 1.09                  |
| 5               | 230499_at      | AA805622  | BIRC3          | 0.000307               | 6.69  | 6.95  | 6.77  | 7.01  | 7.21  | 7.22  | 7.52  | 7.74  | 7.78  | 8.33  | 8.63  | 8.40  | 9.60  | 9.68  | 9.80  | 8.68  | 8.77  | 9.50  | 1.07                  |
| 5               | 241985_at      | AI814405  | JMY            | 0.000024               | 5.82  | 5.96  | 5.76  | 6.29  | 6.12  | 6.31  | 6.35  | 6.68  | 7.01  | 8.23  | 7.96  | 7.71  | 9.63  | 9.39  | 9.92  | 8.14  | 8.11  | 8.49  | 1.15                  |
| 5               | 205220_at      | NM_006018 | GPR109B        | 0.000339               | 5.90  | 5.94  | 5.96  | 5.87  | 6.15  | 5.87  | 6.51  | 6.60  | 6.82  | 8.04  | 8.15  | 8.12  | 9.65  | 9.54  | 9.85  | 7.69  | 8.02  | 8.98  | 1.18                  |
| 5               | 210029_at      | M34455    | INDO           | 0.000000               | 6.87  | 6.57  | 6.70  | 6.99  | 7.13  | 7.03  | 7.43  | 7.22  | 7.27  | 8.58  | 8.66  | 8.63  | 9.38  | 9.48  | 9.49  | 8.25  | 8.49  | 8.47  | 1.49                  |
| 5               | 235175_at      | BG260886  | GBP4           | 0.002124               | 7.02  | 6.53  | 6.72  | 6.94  | 6.38  | 6.87  | 7.30  | 6.86  | 7.11  | 8.02  | 8.19  | 7.99  | 9.13  | 9.09  | 9.38  | 8.34  | 8.09  | 8.69  | 1.11                  |
| 5               | 235574_at      | AW392952  | GBP4           | 0.008656               | 6.35  | 6.18  | 6.15  | 6.41  | 6.38  | 6.25  | 6.32  |       |       |       |       |       |       |       |       |       |       |       |                       |

| K-Mean<br>Order | Probe<br>Names | Gene<br>Symbol | GBiD                    | Adj. p-Value<br>≤0.05, |       |       |       |       |       |       |       |       |       |       |       |       |       |       |       |       |       |       | K-Means<br>Similarity |
|-----------------|----------------|----------------|-------------------------|------------------------|-------|-------|-------|-------|-------|-------|-------|-------|-------|-------|-------|-------|-------|-------|-------|-------|-------|-------|-----------------------|
|                 |                |                |                         | Bonferroni             | c1    | c2    | c3    | 6h1   | 6h2   | 6h3   | 12h1  | 12h2  | 12h3  | 24h1  | 24h2  | 24h3  | 48h1  | 48h2  | 48h3  | 72h1  | 72h2  | 72h3  |                       |
| 6               | 202554_s_at    | AL527430       | GSTM3                   | 0.000459               | 8.45  | 8.59  | 8.61  | 8.05  | 8.09  | 7.95  | 8.06  | 8.07  | 8.03  | 8.10  | 7.87  | 8.01  | 7.52  | 7.62  | 7.52  | 7.43  | 7.31  | 7.52  | 1.71                  |
| 6               | 220639_at      | NM_024795      | TM4SF20                 | 0.002041               | 9.89  | 10.30 | 10.29 | 8.34  | 8.23  | 8.62  | 9.29  | 8.53  | 9.07  | 8.35  | 8.28  | 8.98  | 7.44  | 6.93  | 6.99  | 6.44  | 6.86  | 6.65  | 1.59                  |
| 6               | 227138_at      | AA025858       | CRTAP                   | 0.004721               | 9.72  | 9.65  | 9.62  | 9.25  | 9.27  | 9.22  | 9.62  | 9.52  | 9.53  | 9.39  | 9.39  | 9.33  | 9.14  | 9.06  | 8.99  | 8.40  | 8.78  | 8.69  | 1.56                  |
| 6               | 1559776_at     | H41167         | ---                     | 0.002093               | 7.15  | 7.23  | 6.99  | 6.43  | 6.51  | 6.43  | 7.14  | 6.82  | 7.02  | 6.57  | 6.50  | 6.51  | 6.09  | 6.12  | 6.13  | 5.59  | 5.96  | 5.85  | 1.67                  |
| 6               | 218162_at      | NM_020190      | OLFML3                  | 0.008003               | 9.53  | 9.45  | 9.45  | 8.72  | 8.65  | 8.65  | 9.51  | 9.30  | 9.04  | 9.30  | 9.27  | 9.33  | 8.52  | 7.91  | 8.30  | 7.39  | 7.74  | 7.84  | 1.40                  |
| 6               | 207559_s_at    | NM_005096      | ZNF261                  | 0.028303               | 8.65  | 8.68  | 8.75  | 8.25  | 8.29  | 8.20  | 8.51  | 8.33  | 8.37  | 8.47  | 8.52  | 8.48  | 8.20  | 8.15  | 8.13  | 7.68  | 7.97  | 7.98  | 1.81                  |
| 6               | 231772_x_at    | AL572471       | CENPH                   | 0.004143               | 9.41  | 9.81  | 9.96  | 8.60  | 8.08  | 8.14  | 9.08  | 8.93  | 8.91  | 9.31  | 9.39  | 9.45  | 8.55  | 8.26  | 8.58  | 7.44  | 7.71  | 7.42  | 2.34                  |
| 6               | 226592_at      | AA031404       | LOC286334               | 0.010808               | 9.73  | 10.10 | 9.90  | 9.58  | 9.37  | 9.13  | 10.16 | 10.09 | 10.24 | 10.26 | 10.19 | 10.02 | 9.25  | 9.04  | 9.17  | 8.27  | 8.59  | 8.77  | 1.89                  |
| 6               | 212141_at      | AA604621       | MCM4                    | 0.035887               | 8.84  | 9.21  | 9.21  | 8.73  | 8.31  | 8.38  | 9.44  | 9.40  | 9.14  | 9.14  | 8.92  | 9.23  | 8.36  | 8.17  | 8.43  | 7.91  | 7.67  | 7.85  | 1.84                  |
| 6               | 222037_at      | AI859865       | MCM4                    | 0.028173               | 7.97  | 8.57  | 8.68  | 7.54  | 7.41  | 7.26  | 8.35  | 8.92  | 8.61  | 8.61  | 8.34  | 8.55  | 7.20  | 7.05  | 7.36  | 6.97  | 6.75  | 6.87  | 2.14                  |
| 6               | 216237_s_at    | AA807529       | MCM5                    | 0.011472               | 8.98  | 9.30  | 9.23  | 8.46  | 7.96  | 7.92  | 9.40  | 9.49  | 8.99  | 9.56  | 9.27  | 9.66  | 7.83  | 7.41  | 8.02  | 7.54  | 7.27  | 7.24  | 2.07                  |
| 6               | 209679_s_at    | BC003379       | LOC57228                | 0.020577               | 8.38  | 8.55  | 8.57  | 8.00  | 8.08  | 7.92  | 8.50  | 8.47  | 8.56  | 8.47  | 8.19  | 8.24  | 8.05  | 7.99  | 7.95  | 7.78  | 7.65  | 7.69  | 2.14                  |
| 6               | 225166_at      | AU158022       | ARHGAP18                | 0.003764               | 7.65  | 7.99  | 7.93  | 5.80  | 5.77  | 5.92  | 7.49  | 6.99  | 7.90  | 7.11  | 6.89  | 7.41  | 5.56  | 5.60  | 5.88  | 5.44  | 5.30  | 5.68  | 2.34                  |
| 6               | 1554878_a_at   | BC009712       | ABCD3                   | 0.037963               | 8.59  | 9.10  | 9.02  | 6.93  | 7.23  | 7.12  | 8.67  | 8.41  | 8.69  | 8.39  | 8.33  | 8.81  | 7.03  | 6.97  | 7.60  | 6.77  | 6.82  | 7.35  | 2.60                  |
| 6               | 226552_at      | BF110608       | IER5L                   | 0.003581               | 9.23  | 9.42  | 9.44  | 7.85  | 8.00  | 7.66  | 9.39  | 9.19  | 8.92  | 9.19  | 9.13  | 9.08  | 7.44  | 7.26  | 8.02  | 7.37  | 7.43  | 7.62  | 2.22                  |
| 6               | 231406_at      | AW205664       | LOC401394 /// LOC402578 | 0.020718               | 8.64  | 8.59  | 8.57  | 8.49  | 8.37  | 8.23  | 8.67  | 8.49  | 8.59  | 8.27  | 8.24  | 8.17  | 8.05  | 7.90  | 8.03  | 7.80  | 7.42  | 7.62  | 1.53                  |
| 6               | 238440_at      | BG398847       | CLYBL                   | 0.043826               | 7.65  | 7.88  | 7.54  | 7.47  | 7.42  | 7.69  | 7.62  | 7.55  | 7.72  | 7.49  | 7.34  | 7.41  | 6.89  | 7.10  | 6.97  | 6.29  | 5.86  | 6.48  | 1.57                  |
| 6               | 223839_s_at    | AF132203       | SCD                     | 0.030865               | 9.84  | 9.35  | 9.04  | 9.15  | 9.20  | 9.62  | 9.63  | 9.29  | 9.99  | 9.79  | 9.75  | 8.85  | 8.12  | 7.98  | 8.42  | 6.50  | 6.39  | 6.85  | 1.72                  |
| 6               | 207993_s_at    | NM_007236      | CHP                     | 0.012110               | 9.94  | 9.28  | 9.63  | 9.65  | 9.39  | 9.47  | 9.92  | 9.58  | 9.79  | 9.62  | 9.40  | 9.15  | 8.77  | 8.74  | 8.79  | 7.96  | 7.86  | 7.94  | 1.60                  |
| 6               | 203989_x_at    | NM_001992      | F2R                     | 0.016122               | 7.86  | 7.79  | 7.91  | 8.34  | 8.09  | 7.65  | 8.01  | 8.23  | 8.32  | 7.89  | 7.89  | 7.59  | 7.18  | 7.11  | 6.77  | 6.21  | 5.61  | 6.07  | 1.73                  |
| 6               | 211984_at      | AI653730       | CALM1                   | 0.005420               | 11.02 | 11.43 | 11.32 | 10.64 | 10.63 | 10.68 | 10.98 | 10.95 | 11.04 | 10.47 | 10.50 | 10.76 | 9.47  | 9.50  | 9.86  | 9.57  | 9.65  | 9.99  | 1.41                  |
| 6               | 202596_at      | BC000436       | ENSA                    | 0.009097               | 9.81  | 9.95  | 9.95  | 9.90  | 9.81  | 9.91  | 10.00 | 9.89  | 9.91  | 9.83  | 9.89  | 9.89  | 8.97  | 8.89  | 9.29  | 8.56  | 8.79  | 9.01  | 0.97                  |
| 6               | 201468_s_at    | NM_000903      | NQO1                    | 0.000474               | 12.04 | 12.38 | 12.34 | 11.89 | 11.90 | 11.91 | 12.27 | 12.12 | 12.43 | 11.81 | 11.90 | 12.10 | 10.60 | 10.37 | 10.97 | 9.65  | 9.87  | 10.17 | 0.58                  |
| 6               | 209373_at      | BC003179       | MALL                    | 0.000881               | 11.43 | 11.84 | 11.86 | 11.42 | 11.50 | 10.90 | 11.84 | 11.77 | 11.67 | 11.45 | 11.43 | 11.60 | 9.05  | 8.78  | 9.68  | 7.85  | 8.11  | 8.79  | 0.62                  |
| 6               | 221488_s_at    | AF230924       | C6orf82                 | 0.003755               | 11.04 | 11.12 | 11.10 | 10.97 | 11.08 | 10.84 | 11.37 | 11.08 | 11.32 | 10.76 | 10.80 | 10.87 | 9.60  | 9.55  | 10.17 | 9.03  | 9.36  | 9.52  | 0.92                  |
| 6               | 213564_x_at    | BE042354       | LDHB                    | 0.018503               | 13.23 | 13.49 | 13.44 | 13.19 | 13.13 | 13.37 | 13.26 | 13.18 | 13.43 | 13.08 | 13.13 | 13.24 | 12.27 | 11.95 | 12.57 | 11.87 | 11.86 | 12.12 | 0.89                  |
| 6               | 201030_x_at    | NM_002300      | LDHB                    | 0.020575               | 12.65 | 12.98 | 12.86 | 12.55 | 12.50 | 12.80 | 12.63 | 12.61 | 12.81 | 12.48 | 12.56 | 12.72 | 11.45 | 11.39 | 11.96 | 11.18 | 11.18 | 11.47 | 0.87                  |
| 6               | 208848_at      | M30471         | ADH5                    | 0.021336               | 8.41  | 8.65  | 8.64  | 8.21  | 7.98  | 8.49  | 8.27  | 8.09  | 8.45  | 8.04  | 7.97  | 8.40  | 6.79  | 6.65  | 7.31  | 6.16  | 6.07  | 6.67  | 0.90                  |
| 6               | 226545_at      | AL110152       | CD109                   | 0.010753               | 9.87  | 10.16 | 10.14 | 9.70  | 9.77  | 9.95  | 9.78  | 9.90  | 10.45 | 9.63  | 9.72  | 9.80  | 8.18  | 7.78  | 8.71  | 7.41  | 7.46  | 7.95  | 0.89                  |
| 6               | 214039_s_at    | TI5777         | LAPTM4B                 | 0.045244               | 12.01 | 12.24 | 12.27 | 11.84 | 11.82 | 12.12 | 11.95 | 11.87 | 12.28 | 11.65 | 11.67 | 11.79 | 10.07 | 9.67  | 10.82 | 9.03  | 9.08  | 10.02 | 0.98                  |
| 6               | 205353_s_at    | NM_002567      | PBP                     | 0.003809               | 10.94 | 11.04 | 10.88 | 10.91 | 10.76 | 10.75 | 10.99 | 10.86 | 10.91 | 10.72 | 10.64 | 10.72 | 9.41  | 8.95  | 9.86  | 8.58  | 8.65  | 9.11  | 0.83                  |
| 6               | 226157_at      | AI569747       | TFDP2                   | 0.000123               | 8.39  | 8.86  | 8.82  | 8.37  | 8.43  | 8.36  | 8.78  | 8.71  | 9.00  | 8.26  | 8.07  | 8.45  | 6.67  | 6.55  | 6.97  | 6.22  | 6.09  | 6.55  | 0.73                  |
| 6               | 227639_at      | AI275605       | PIGK                    | 0.008581               | 7.50  | 7.79  | 7.78  | 7.33  | 6.94  | 7.50  | 7.29  | 7.40  | 7.96  | 7.13  | 7.05  | 7.20  | 5.50  | 5.66  | 5.95  | 5.00  | 5.10  | 5.69  | 0.98                  |
| 6               | 215380_s_at    | AK021779       | C7orf24                 | 0.012375               | 10.01 | 10.42 | 10.28 | 9.79  | 9.72  | 10.14 | 9.93  | 9.97  | 10.45 | 9.86  | 9.83  | 10.10 | 8.66  | 8.54  | 8.81  | 8.09  | 8.28  | 8.63  | 0.94                  |
| 6               | 210532_s_at    | AF116639       | C14orf2                 | 0.010847               | 11.63 | 11.95 | 11.91 | 11.52 | 11.62 | 11.70 | 11.54 | 11.57 | 11.65 | 11.42 | 11.47 | 11.63 | 10.52 | 10.54 | 10.96 | 10.25 | 10.57 | 10.45 | 0.94                  |
| 6               | 216594_x_at    | S68290         | AKR1C1                  | 0.000089               | 13.91 | 14.01 | 13.97 | 13.87 | 13.91 | 13.92 | 13.81 | 13.80 | 13.90 | 13.70 | 13.62 | 13.83 | 12.71 | 12.75 | 13.15 | 12.22 | 12.33 | 12.39 | 0.86                  |
| 6               | 200947_s_at    | NM_005271      | GLUD1                   | 0.002590               | 10.07 | 10.06 | 10.19 | 9.84  | 9.68  | 10.07 | 9.99  | 9.77  | 10.25 | 9.74  | 9.74  | 9.82  | 8.83  | 8.64  | 9.15  | 8.38  | 8.28  | 8.33  | 0.93                  |
| 6               | 218025_s_at    | NM_006117      | PECI                    | 0.004992               | 9.04  | 9.40  | 9.38  | 8.98  | 8.96  | 9.50  | 9.13  | 8.96  | 9.53  | 9.03  | 8.91  | 9.25  | 7.96  | 7.73  | 8.11  | 7.20  | 6.99  | 7.14  | 1.08                  |
| 6               | 201941_at      | BE349147       | CPD                     | 0.005650               | 10.21 | 10.34 | 10.29 | 9.89  | 10.07 | 10.46 | 10.39 | 10.37 | 10.87 | 9.94  | 10.04 | 10.13 | 8.53  | 8.53  | 9.05  | 7.54  | 7.67  | 8.31  | 1.10                  |
| 6               | 228077_at      | AK026666       | MGC3207                 | 0.001278               | 8.78  | 8.96  | 8.79  | 8.66  | 8.59  | 8.89  | 8.90  | 8.98  | 9.30  | 8.80  | 8.69  | 8.64  | 7.74  | 7.55  | 7.70  | 7.12  | 7.35  | 7.57  | 1.15                  |
| 6               | 217771_at      | NM_016548      | GOLPH2                  | 0.042452               | 8.78  | 9.59  | 9.56  | 8.97  | 9.15  | 8.88  | 9.20  | 9.19  | 9.38  | 8.80  | 8.75  | 9.19  | 7.55  | 7.43  | 7.93  | 7.58  | 7.38  | 7.44  | 0.97                  |
| 6               | 217736_s_at    | NM_014413      | EIF2AK1                 | 0.005094               | 11.17 | 11.42 | 11.41 | 11.20 | 11.04 | 11.03 | 10.95 | 11.01 | 11.16 | 10.94 | 10.92 | 11.05 | 9.93  | 9.86  | 10.36 | 9.49  | 9.67  | 9.92  | 0.80                  |
| 6               | 211623_s_at    | M30448         | FBL                     | 0.028680               | 12.08 | 12.52 | 12.43 | 12.05 | 11.89 | 11.86 | 11.97 | 11.93 | 12.06 | 11.84 | 11.91 | 12.14 | 11.04 | 10.77 | 11.24 | 10.85 | 10.84 | 11.11 | 1.01                  |
| 6               | 208680_at      | L19184         | PRDX1                   | 0.002218               | 12.72 | 13.02 | 13.03 | 12.43 | 12.45 | 12.42 | 12.52 | 12.43 | 12.48 | 12.30 | 12.32 | 12.60 | 11.12 | 11.07 | 11.60 | 10.83 | 11.04 | 11.23 | 0.83                  |
| 6               | 207507_s_at    | NM_001689      | ATP5G3                  | 0.001641               | 11.44 | 11.63 | 11.67 | 11.24 | 11.11 | 10.94 | 11.26 | 11.17 | 11.04 | 10.96 | 10.98 | 11.29 | 9.91  | 9.75  | 10.23 | 9.61  | 9.75  | 9.90  | 0.82                  |
| 6               | 222405_at      | AL573951       | ---                     | 0.002663               | 11.62 | 11.99 | 11.93 | 11.34 | 11.28 | 11.39 | 11.53 | 11.35 | 11.56 | 11.13 | 11.13 | 11.36 | 9.92  | 9.52  | 10.35 | 9.57  | 9.65  | 9.85  | 0.84                  |
| 6               | 226336_at      | T62044         | ---                     | 0.000835               | 10.58 | 10.94 | 10.97 | 10.31 | 10.24 | 10.12 | 10.37 | 10.35 | 10.49 | 9.99  | 9.93  | 10.17 | 8.81  | 8.67  | 9.17  | 8.45  | 8.62  | 8.95  | 0.91                  |
| 6               | 201754_at      | NM_004374      | COX6C                   | 0.020472               | 11.96 | 12.19 | 12.19 | 11.82 | 11.71 | 11.75 | 11.85 | 11.65 | 11.86 | 11.69 | 11.63 | 11.89 | 10.59 | 11.18 | 10.69 | 10.71 | 10.65 | 1.05  |                       |
| 6               | 208644_at      | M32721         | PARP1                   | 0.033075               | 9.29  | 9.86  | 9.90  | 9.17  | 9.23  | 9.25  | 9.21  | 9.39  | 9.48  | 9.12  | 9.17  | 9.42  | 8.27  | 8.19  | 8.28  | 7.71  | 7.75  | 8.26  | 0.90                  |
| 6               | 228882_at      | AL042088       | TUB                     | 0.021812               | 7.74  | 8.38  | 8.38  | 7.81  | 8.08  | 7.86  | 7.92  | 8.02  | 8.08  | 7.76  | 7.81  | 8.14  | 6.61  | 6.55  | 6.91  | 6.12  | 6.31  | 6.60  | 0.78                  |
| 6               | 208029_s_at    | NM_018407      | LAPTM4B                 | 0.040777               | 10.11 | 10.75 | 10.82 | 10.02 | 10.03 | 10.13 | 10.15 | 10.12 | 10.48 | 9.79  | 9.85  | 10.34 | 8.24  |       |       |       |       |       |                       |

| K-Mean<br>Order | Probe<br>Names | Gene<br>Symbol | GBiD           | Adj. p-Value<br>≤0.05,<br>Bonferroni |       |       |       |       |       |       |       |       |       |       |       |       |       |       |       |       |       |       | K-Means<br>Similarity |
|-----------------|----------------|----------------|----------------|--------------------------------------|-------|-------|-------|-------|-------|-------|-------|-------|-------|-------|-------|-------|-------|-------|-------|-------|-------|-------|-----------------------|
|                 |                |                |                |                                      | c1    | c2    | c3    | 6h1   | 6h2   | 6h3   | 12h1  | 12h2  | 12h3  | 24h1  | 24h2  | 24h3  | 48h1  | 48h2  | 48h3  | 72h1  | 72h2  | 72h3  |                       |
| 6               | 201433_s_at    | NM_014754      | PTDSS1         | 0.000044                             | 11.19 | 11.46 | 11.38 | 11.14 | 11.15 | 10.89 | 11.10 | 11.13 | 11.04 | 10.72 | 10.76 | 10.94 | 9.53  | 9.27  | 9.58  | 8.78  | 8.81  | 9.27  | 0.67                  |
| 6               | 224415_s_at    | AF356515       | HINT2          | 0.000030                             | 10.90 | 11.00 | 10.94 | 11.05 | 10.73 | 10.67 | 10.97 | 10.72 | 10.67 | 10.64 | 10.61 | 10.69 | 9.35  | 9.31  | 9.63  | 8.90  | 9.04  | 9.05  | 0.79                  |
| 6               | 41220_at       | AB023208       |                | 0.002207                             | 11.89 | 12.13 | 12.10 | 11.93 | 11.96 | 11.71 | 11.78 | 11.75 | 11.59 | 11.76 | 11.74 | 11.87 | 11.20 | 11.09 | 11.27 | 10.95 | 10.88 | 10.96 | 1.08                  |
| 6               | 201135_at      | NM_004092      | ECHS1          | 0.0027710                            | 10.54 | 10.73 | 10.68 | 10.81 | 10.56 | 10.18 | 10.47 | 10.42 | 10.17 | 10.29 | 10.37 | 10.48 | 9.58  | 9.43  | 9.69  | 9.20  | 9.09  | 9.32  | 1.10                  |
| 6               | 225427_s_at    | BE871169       | APOA1BP        | 0.023733                             | 10.79 | 11.02 | 10.92 | 11.07 | 10.89 | 9.99  | 10.87 | 10.78 | 10.18 | 10.43 | 10.33 | 10.47 | 8.87  | 8.78  | 9.10  | 8.32  | 8.55  | 8.12  | 1.09                  |
| 6               | 218200_s_at    | NM_004546      | NDUFB2         | 0.022480                             | 10.48 | 10.74 | 10.67 | 10.53 | 10.44 | 9.79  | 10.67 | 10.41 | 9.94  | 10.20 | 10.23 | 10.49 | 8.91  | 8.79  | 9.18  | 8.49  | 8.43  | 8.47  | 0.88                  |
| 6               | 201900_s_at    | NM_006066      | AKR1A1         | 0.032251                             | 10.17 | 10.59 | 10.41 | 10.30 | 10.36 | 9.62  | 10.36 | 10.14 | 9.82  | 9.98  | 9.87  | 10.18 | 8.88  | 8.89  | 8.96  | 8.32  | 8.54  | 8.48  | 0.95                  |
| 6               | 201403_s_at    | NM_004528      | MGST3          | 0.005282                             | 10.97 | 11.33 | 11.32 | 10.94 | 10.90 | 10.41 | 11.05 | 10.76 | 10.52 | 10.58 | 10.57 | 10.96 | 9.43  | 9.51  | 9.60  | 9.10  | 9.17  | 9.01  | 0.88                  |
| 6               | 208837_at      | BC000027       | TMED3          | 0.005119                             | 9.57  | 9.95  | 9.80  | 9.53  | 9.57  | 8.88  | 9.47  | 9.50  | 9.32  | 9.27  | 9.22  | 9.47  | 8.05  | 7.96  | 8.19  | 7.56  | 7.84  | 7.87  | 0.80                  |
| 6               | 223112_s_at    | AF044954       | NDUFB10        | 0.000409                             | 11.21 | 11.50 | 11.48 | 11.26 | 11.18 | 10.68 | 11.21 | 11.04 | 11.02 | 10.85 | 10.86 | 11.12 | 9.52  | 9.38  | 9.78  | 8.88  | 9.03  | 9.20  | 0.58                  |
| 6               | 218026_at      | NM_014019      | HSPC009        | 0.003538                             | 10.85 | 11.12 | 11.19 | 10.92 | 10.91 | 10.51 | 11.00 | 10.73 | 10.60 | 10.49 | 10.45 | 10.79 | 9.16  | 9.16  | 9.62  | 8.68  | 9.05  | 9.05  | 0.80                  |
| 6               | 226611_s_at    | AA722878       | PRR6           | 0.007279                             | 10.04 | 10.64 | 10.61 | 10.25 | 10.13 | 9.68  | 10.12 | 10.00 | 9.90  | 9.79  | 9.66  | 10.24 | 8.43  | 8.31  | 8.61  | 8.27  | 8.16  | 8.31  | 0.92                  |
| 6               | 216308_x_at    | AK026752       | GRHPR          | 0.010775                             | 10.11 | 10.36 | 10.36 | 10.31 | 10.22 | 9.74  | 10.32 | 10.07 | 9.87  | 9.82  | 9.85  | 10.03 | 8.79  | 8.74  | 9.06  | 8.67  | 8.68  | 8.67  | 1.00                  |
| 6               | 201347_x_at    | NM_012203      | GRHPR          | 0.018552                             | 10.51 | 10.83 | 10.84 | 10.75 | 10.72 | 10.14 | 10.77 | 10.53 | 10.26 | 10.27 | 10.27 | 10.46 | 9.24  | 9.16  | 9.39  | 8.96  | 9.09  | 9.10  | 1.03                  |
| 6               | 202475_at      | NM_006326      | NIFIE14        | 0.015275                             | 11.59 | 12.02 | 11.92 | 11.87 | 11.98 | 11.20 | 11.93 | 11.77 | 11.30 | 11.52 | 11.45 | 11.71 | 9.98  | 10.00 | 10.17 | 9.85  | 9.75  | 9.92  | 1.09                  |
| 6               | 205141_at      | NM_001145      | ANG /// RNASE4 | 0.022393                             | 7.66  | 7.83  | 7.75  | 7.65  | 7.82  | 7.46  | 7.90  | 7.57  | 7.58  | 7.51  | 7.50  | 7.70  | 6.81  | 6.76  | 6.98  | 6.46  | 6.72  | 6.62  | 0.95                  |
| 6               | 203458_at      | AI951454       | SPR            | 0.030467                             | 9.75  | 9.99  | 10.09 | 9.91  | 9.88  | 9.42  | 9.91  | 9.92  | 9.67  | 9.45  | 9.53  | 9.58  | 8.70  | 8.75  | 8.91  | 8.64  | 8.81  | 8.56  | 1.22                  |
| 6               | 223516_s_at    | AF216754       | C6orf49        | 0.010142                             | 9.01  | 9.40  | 9.44  | 8.93  | 9.13  | 8.67  | 9.01  | 8.94  | 8.75  | 8.63  | 8.63  | 8.85  | 7.60  | 7.67  | 7.84  | 7.77  | 7.90  | 7.60  | 1.38                  |
| 6               | 210149_s_at    | AF061735       | ATP5H          | 0.021629                             | 11.95 | 12.24 | 12.12 | 12.00 | 11.87 | 11.56 | 12.04 | 11.73 | 11.76 | 11.67 | 11.59 | 11.80 | 10.59 | 10.50 | 10.96 | 10.46 | 10.78 | 10.51 | 1.08                  |
| 6               | 201277_s_at    | NM_004499      | HNRPA3         | 0.003481                             | 11.70 | 12.22 | 12.22 | 12.00 | 11.91 | 11.75 | 11.77 | 11.84 | 11.87 | 11.57 | 11.56 | 11.93 | 10.49 | 10.38 | 10.82 | 10.32 | 10.17 | 10.20 | 0.84                  |
| 6               | 225901_at      | AI440338       | PTPMT1         | 0.043694                             | 8.12  | 8.38  | 8.26  | 8.28  | 8.24  | 7.77  | 8.40  | 8.27  | 8.23  | 8.24  | 8.03  | 8.13  | 7.09  | 7.13  | 7.30  | 7.27  | 7.41  | 7.18  | 1.50                  |
| 6               | 203263_s_at    | AI625739       | ARHGEF9        | 0.042314                             | 6.36  | 6.68  | 6.58  | 6.47  | 6.68  | 6.48  | 6.76  | 6.75  | 6.50  | 6.82  | 6.56  | 6.75  | 6.10  | 5.95  | 5.94  | 5.71  | 5.68  | 5.77  | 1.45                  |
| 6               | 218561_s_at    | NM_020408      | C6orf149       | 0.023267                             | 8.35  | 8.83  | 8.74  | 8.82  | 9.03  | 8.70  | 8.82  | 8.83  | 8.81  | 8.72  | 8.63  | 8.97  | 8.04  | 8.04  | 8.12  | 7.58  | 7.63  | 7.64  | 1.45                  |
| 6               | 211720_x_at    | BC005863       | RPLP0          | 0.032825                             | 13.98 | 14.00 | 14.01 | 13.99 | 13.96 | 13.89 | 13.94 | 14.00 | 13.94 | 13.96 | 13.99 | 14.04 | 13.73 | 13.70 | 13.82 | 13.64 | 13.66 | 13.69 | 1.01                  |
| 6               | 200039_s_at    | NM_002794      | PSMB2          | 0.011041                             | 11.06 | 11.21 | 11.22 | 11.10 | 11.00 | 10.71 | 11.06 | 11.04 | 10.86 | 11.11 | 11.09 | 11.19 | 10.30 | 10.29 | 10.49 | 10.05 | 10.12 | 10.20 | 0.99                  |
| 6               | 1557915_s_at   | U56250         | GSTO1          | 0.002020                             | 10.14 | 10.40 | 10.36 | 10.09 | 10.08 | 10.03 | 10.38 | 10.15 | 10.11 | 10.33 | 10.20 | 10.51 | 9.07  | 8.89  | 9.50  | 8.58  | 8.60  | 8.67  | 0.85                  |
| 6               | 202237_at      | NM_006169      | NNMT           | 0.024105                             | 10.67 | 10.84 | 10.75 | 10.57 | 10.38 | 10.65 | 10.54 | 10.64 | 10.85 | 10.77 | 10.80 | 9.86  | 9.75  | 10.24 | 9.50  | 9.61  | 9.80  | 1.12  |                       |
| 6               | 218507_at      | NM_013332      | HIG2           | 0.000259                             | 9.69  | 9.68  | 9.62  | 9.54  | 9.54  | 9.38  | 9.66  | 9.79  | 9.75  | 9.80  | 9.64  | 9.68  | 8.63  | 8.68  | 8.92  | 8.37  | 8.61  | 8.59  | 1.03                  |
| 6               | 210510_s_at    | AF145712       | NRP1           | 0.029161                             | 8.07  | 8.38  | 8.28  | 8.14  | 8.19  | 8.03  | 8.21  | 8.43  | 8.52  | 8.41  | 8.50  | 8.65  | 7.52  | 7.63  | 7.91  | 7.20  | 7.32  | 7.31  | 1.56                  |
| 6               | 221142_s_at    | NM_018441      | PCR1           | 0.031173                             | 8.31  | 8.61  | 8.70  | 8.36  | 8.60  | 8.38  | 8.37  | 8.34  | 8.47  | 8.22  | 8.09  | 8.35  | 7.90  | 7.80  | 7.96  | 7.48  | 7.47  | 7.48  | 1.24                  |
| 6               | 205770_at      | NM_000637      | GSR            | 0.032312                             | 9.54  | 10.06 | 10.56 | 9.78  | 9.67  | 9.67  | 9.59  | 9.59  | 9.52  | 9.39  | 9.27  | 9.73  | 8.58  | 8.58  | 8.76  | 7.84  | 7.53  | 7.12  | 1.38                  |
| 6               | 226377_at      | AI093722       | ---            | 0.007291                             | 9.38  | 9.61  | 9.47  | 9.53  | 9.43  | 9.26  | 9.33  | 9.34  | 9.44  | 9.34  | 9.42  | 9.24  | 9.00  | 8.82  | 8.99  | 8.05  | 8.43  | 8.11  | 1.56                  |
| 6               | 212788_x_at    | BG537190       | FTL            | 0.016634                             | 13.98 | 14.10 | 14.07 | 14.12 | 14.10 | 13.99 | 14.09 | 14.06 | 13.99 | 13.98 | 14.03 | 14.07 | 13.32 | 13.20 | 13.29 | 12.87 | 12.84 | 12.18 | 1.49                  |
| 6               | 208308_s_at    | NM_000175      | GPI            | 0.001131                             | 12.21 | 12.65 | 12.62 | 12.82 | 12.67 | 12.05 | 12.43 | 12.36 | 12.03 | 12.19 | 12.14 | 12.43 | 10.69 | 10.64 | 11.14 | 9.52  | 9.58  | 9.02  | 1.21                  |
| 6               | 211653_x_at    | M33376         | AKR1C2         | 0.000245                             | 13.82 | 13.93 | 13.96 | 13.87 | 13.86 | 13.85 | 13.78 | 13.75 | 13.86 | 13.69 | 13.72 | 13.82 | 13.17 | 13.20 | 13.45 | 12.67 | 12.82 | 12.61 | 1.16                  |
| 6               | 1555889_a_at   | BQ876971       | CRTAP          | 0.000005                             | 12.35 | 12.47 | 12.48 | 12.31 | 12.37 | 12.17 | 12.39 | 12.47 | 12.40 | 12.23 | 12.26 | 12.13 | 11.40 | 11.26 | 11.53 | 10.73 | 10.78 | 10.54 | 0.89                  |
| 6               | 213617_s_at    | BF063896       | C18orf10       | 0.000085                             | 9.48  | 9.73  | 9.65  | 9.72  | 9.64  | 9.56  | 9.88  | 9.57  | 9.57  | 9.60  | 9.50  | 9.64  | 8.90  | 8.83  | 8.80  | 8.22  | 8.26  | 8.11  | 1.14                  |
| 6               | 212336_at      | AA912711       | EPB41L1        | 0.023790                             | 8.25  | 8.39  | 8.21  | 8.10  | 7.71  | 8.01  | 8.04  | 7.99  | 8.33  | 8.08  | 7.91  | 7.67  | 7.04  | 6.89  | 7.57  | 6.38  | 6.27  | 6.45  | 1.17                  |
| 6               | 212151_at      | BF967998       | PBX1           | 0.000130                             | 11.41 | 11.65 | 11.41 | 11.00 | 10.81 | 10.81 | 11.27 | 11.18 | 11.50 | 11.04 | 11.00 | 11.03 | 9.46  | 9.14  | 10.00 | 8.67  | 8.61  | 8.39  | 0.68                  |
| 6               | 212279_at      | BE779865       | MAC30          | 0.008724                             | 11.75 | 12.01 | 11.80 | 11.18 | 11.11 | 11.23 | 11.58 | 11.47 | 11.64 | 11.32 | 11.19 | 11.43 | 10.19 | 9.86  | 10.73 | 9.16  | 9.64  | 8.84  | 1.07                  |
| 6               | 208964_s_at    | AL512760       | FADS1          | 0.000715                             | 11.66 | 11.77 | 11.76 | 11.25 | 11.11 | 11.21 | 11.41 | 11.18 | 11.52 | 11.20 | 11.37 | 11.23 | 10.54 | 10.29 | 10.97 | 9.38  | 9.54  | 9.50  | 1.23                  |
| 6               | 208963_x_at    | BG165833       | FADS1          | 0.000863                             | 11.44 | 11.61 | 11.48 | 11.01 | 11.06 | 10.91 | 11.36 | 11.18 | 11.39 | 11.27 | 11.28 | 10.97 | 10.19 | 10.22 | 10.65 | 9.25  | 9.60  | 9.14  | 1.17                  |
| 6               | 226789_at      | W84421         | ---            | 0.027247                             | 8.44  | 8.81  | 8.83  | 8.32  | 8.32  | 8.49  | 8.58  | 8.57  | 8.91  | 8.55  | 8.45  | 8.70  | 7.93  | 7.95  | 8.05  | 7.36  | 7.39  | 7.01  | 1.39                  |
| 6               | 212186_at      | BE855983       | ACACA          | 0.009124                             | 10.31 | 10.60 | 10.58 | 10.24 | 10.38 | 10.24 | 10.07 | 10.33 | 10.34 | 10.20 | 10.41 | 10.20 | 9.52  | 9.40  | 9.49  | 8.77  | 8.74  | 9.25  | 1.04                  |
| 6               | 212339_at      | AL121895       | EPB41L1        | 0.046218                             | 8.76  | 9.27  | 9.09  | 8.60  | 8.81  | 8.78  | 8.68  | 9.01  | 8.80  | 8.88  | 8.82  | 8.99  | 7.76  | 7.48  | 8.19  | 6.45  | 6.50  | 7.26  | 1.15                  |
| 6               | 200832_s_at    | AB032261       | SCD            | 0.001665                             | 11.32 | 11.97 | 11.84 | 10.75 | 11.08 | 11.18 | 11.17 | 11.08 | 11.45 | 11.27 | 11.34 | 11.43 | 9.68  | 9.50  | 10.24 | 8.45  | 8.49  | 8.91  | 0.86                  |
| 6               | 213397_x_at    | AI761728       | RNASE4         | 0.004819                             | 8.98  | 9.40  | 9.17  | 8.84  | 9.20  | 9.12  | 9.18  | 8.93  | 9.69  | 8.98  | 8.90  | 9.22  | 7.26  | 7.34  | 7.88  | 5.72  | 6.10  | 6.67  | 1.06                  |
| 6               | 206561_s_at    | NM_020299      | AKR1B10        | 0.000293                             | 13.85 | 13.93 | 13.91 | 13.84 | 13.82 | 13.88 | 13.82 | 13.80 | 13.93 | 13.76 | 13.82 | 13.88 | 12.87 | 12.79 | 13.30 | 11.97 | 11.94 | 12.30 | 1.13                  |
| 6               | 224743_at      | BF674724       | IMPAD1         | 0.008109                             | 10.64 | 10.69 | 10.69 | 10.59 | 10.68 | 10.57 | 10.61 | 10.79 | 10.93 | 10.52 | 10.56 | 10.57 | 9.91  | 9.95  | 10.28 | 9.25  | 9.43  | 9.63  | 1.21                  |
| 6               | 212148_at      | AL049381       | PBX1           | 0.002357                             | 10.71 | 10.97 | 10.82 | 10.32 | 10.07 | 10.64 | 10.48 | 10.70 | 11.06 | 10.40 | 10.44 | 10.29 |       |       |       |       |       |       |                       |

| K-Mean<br>Order | Probe<br>Names | Gene<br>GBiD<br>Symbol | Adj. p-Value<br>≤0.05,     |          |       |       |       |       |       |       |       |       |       |       |       |       |       |       |       |       |       | K-Means<br>Similarity |      |
|-----------------|----------------|------------------------|----------------------------|----------|-------|-------|-------|-------|-------|-------|-------|-------|-------|-------|-------|-------|-------|-------|-------|-------|-------|-----------------------|------|
|                 |                |                        | Bonferroni                 | c1       | c2    | c3    | 6h1   | 6h2   | 6h3   | 12h1  | 12h2  | 12h3  | 24h1  | 24h2  | 24h3  | 48h1  | 48h2  | 48h3  | 72h1  | 72h2  | 72h3  |                       |      |
| 6               | 234873_x_at    | AJ224080               | RPL7A /// LOC133748 /// LC | 0.000657 | 12.69 | 12.84 | 12.85 | 12.68 | 12.75 | 12.66 | 12.77 | 12.78 | 12.83 | 12.67 | 12.77 | 12.82 | 12.23 | 12.21 | 12.35 | 12.04 | 12.15 | 12.07                 | 0.70 |
| 6               | 217740_x_at    | NM_000972              | RPL7A                      | 0.049840 | 13.32 | 13.46 | 13.49 | 13.27 | 13.38 | 13.27 | 13.38 | 13.39 | 13.40 | 13.27 | 13.36 | 13.45 | 12.83 | 12.84 | 13.07 | 12.66 | 12.75 | 12.83                 | 0.78 |
| 6               | 2101043_s_at   | NM_006305              | ANP32A                     | 0.002662 | 9.10  | 9.59  | 9.63  | 9.77  | 9.52  | 9.37  | 9.28  | 9.19  | 9.22  | 9.22  | 9.05  | 9.17  | 7.64  | 7.81  | 8.20  | 7.32  | 6.67  | 7.21                  | 1.16 |
| 6               | 225982_at      | BG341575               | UBTF                       | 0.027581 | 8.89  | 9.13  | 9.18  | 8.83  | 8.72  | 8.59  | 8.96  | 8.87  | 8.74  | 8.62  | 8.69  | 8.73  | 8.17  | 8.30  | 8.35  | 8.06  | 7.94  | 8.13                  | 1.08 |
| 6               | 201611_s_at    | NM_012405              | ICMT                       | 0.004323 | 8.25  | 8.53  | 8.49  | 8.29  | 8.17  | 7.95  | 8.26  | 8.11  | 7.94  | 7.82  | 7.85  | 7.93  | 7.29  | 7.29  | 7.39  | 6.92  | 6.58  | 6.96                  | 1.10 |
| 6               | 227944_at      | BF437260               | PTPN3                      | 0.017117 | 7.10  | 7.33  | 7.31  | 7.00  | 7.05  | 7.04  | 7.25  | 7.23  | 7.09  | 6.77  | 6.94  | 7.05  | 6.62  | 6.53  | 6.52  | 6.42  | 6.23  | 6.43                  | 1.18 |
| 6               | 201380_at      | NM_006371              | CRTAP                      | 0.019133 | 9.61  | 10.10 | 10.19 | 9.25  | 9.52  | 9.44  | 9.74  | 9.79  | 10.04 | 9.52  | 9.64  | 9.67  | 8.52  | 8.34  | 8.85  | 8.10  | 7.60  | 8.13                  | 0.85 |
| 6               | 208643_s_at    | J04977                 | XRCC5                      | 0.010215 | 10.22 | 10.68 | 10.81 | 9.92  | 10.01 | 10.16 | 10.22 | 10.20 | 10.43 | 10.01 | 9.99  | 10.40 | 9.18  | 9.13  | 9.46  | 8.75  | 8.57  | 8.67                  | 0.83 |
| 6               | 208767_s_at    | AW149681               | LAPTM4B                    | 0.036684 | 10.26 | 11.25 | 11.43 | 10.06 | 10.33 | 10.09 | 10.23 | 10.28 | 10.22 | 9.90  | 9.99  | 10.62 | 8.92  | 8.65  | 8.91  | 8.02  | 7.64  | 8.16                  | 0.98 |
| 6               | 225781_at      | AI808345               | MAPK9                      | 0.005345 | 9.00  | 9.40  | 9.34  | 8.73  | 8.67  | 8.70  | 9.00  | 8.85  | 8.92  | 8.81  | 8.75  | 8.85  | 8.20  | 8.16  | 8.22  | 7.75  | 7.49  | 7.97                  | 0.99 |
| 6               | 59697_at       | AA582932               | RAB15                      | 0.003527 | 9.95  | 10.39 | 10.36 | 9.48  | 9.56  | 9.52  | 10.10 | 9.92  | 9.88  | 9.55  | 9.59  | 9.74  | 8.70  | 8.91  | 9.13  | 8.21  | 8.36  | 8.58                  | 0.96 |
| 6               | 202207_at      | BG435404               | ARL7                       | 0.039879 | 10.43 | 10.83 | 10.82 | 10.25 | 10.28 | 10.05 | 10.55 | 10.40 | 10.44 | 10.17 | 10.35 | 10.41 | 9.52  | 9.37  | 9.71  | 8.84  | 8.94  | 9.40                  | 0.77 |
| 6               | 223041_at      | AL136580               | CD99L2                     | 0.002671 | 9.65  | 9.96  | 9.87  | 9.24  | 9.33  | 8.86  | 9.52  | 9.58  | 9.20  | 9.21  | 9.23  | 9.41  | 8.41  | 8.26  | 8.57  | 7.52  | 7.71  | 7.89                  | 0.84 |
| 6               | 226656_at      | AW024741               | CRTAP                      | 0.022855 | 9.25  | 9.72  | 9.67  | 9.02  | 9.07  | 8.91  | 9.34  | 9.18  | 9.18  | 9.03  | 9.15  | 9.25  | 8.34  | 8.42  | 8.59  | 8.36  | 8.14  | 8.15                  | 1.08 |
| 6               | 205305_at      | NM_004467              | FGL1                       | 0.013429 | 9.57  | 9.87  | 9.79  | 9.01  | 8.92  | 9.16  | 9.52  | 9.07  | 9.39  | 9.03  | 9.14  | 9.48  | 7.95  | 7.94  | 8.53  | 7.71  | 7.75  | 7.45                  | 0.98 |
| 6               | 213484_at      | AI097640               | ---                        | 0.000011 | 9.21  | 9.46  | 9.41  | 8.95  | 8.85  | 8.84  | 8.86  | 8.88  | 8.88  | 8.62  | 8.66  | 8.84  | 7.93  | 8.02  | 7.81  | 7.62  | 7.48  | 7.69                  | 1.07 |
| 6               | 224717_s_at    | W93048                 | MGC2747                    | 0.025694 | 8.79  | 9.32  | 9.36  | 8.73  | 8.91  | 8.69  | 8.93  | 8.88  | 8.85  | 8.62  | 8.65  | 8.96  | 8.00  | 7.97  | 7.82  | 7.72  | 7.62  | 7.76                  | 1.00 |
| 6               | 202242_at      | NM_004615              | TSPAN7                     | 0.000110 | 9.27  | 9.82  | 9.85  | 8.96  | 9.37  | 9.02  | 9.49  | 9.44  | 9.56  | 8.98  | 9.03  | 9.23  | 7.66  | 7.77  | 7.69  | 7.23  | 7.28  | 7.38                  | 0.70 |
| 6               | 207168_s_at    | NM_004893              | H2AFY                      | 0.035343 | 11.08 | 11.42 | 11.43 | 11.21 | 11.03 | 11.00 | 11.12 | 11.07 | 11.15 | 11.00 | 11.09 | 11.33 | 10.38 | 10.30 | 10.46 | 10.37 | 10.13 | 10.07                 | 1.00 |
| 6               | 226243_at      | BF590958               | LOC391356                  | 0.006076 | 10.17 | 10.50 | 10.45 | 10.07 | 10.28 | 9.81  | 10.35 | 10.22 | 10.05 | 10.06 | 10.13 | 10.16 | 9.31  | 9.25  | 9.24  | 9.00  | 9.08  | 8.89                  | 0.88 |
| 6               | 201134_x_at    | NM_001867              | COX7C                      | 0.000846 | 11.70 | 11.99 | 11.90 | 11.71 | 11.66 | 11.39 | 11.84 | 11.80 | 11.74 | 11.62 | 11.69 | 11.79 | 10.74 | 10.63 | 10.74 | 10.69 | 10.74 | 10.48                 | 1.00 |
| 6               | 209440_at      | BC001605               | PRPS1                      | 0.003978 | 10.25 | 10.66 | 10.65 | 10.29 | 10.08 | 9.96  | 10.30 | 10.21 | 10.23 | 10.19 | 10.08 | 10.32 | 9.37  | 9.36  | 9.39  | 9.16  | 9.20  | 9.00                  | 0.85 |
| 6               | 201609_x_at    | AL578502               | ICMT                       | 0.013558 | 9.45  | 9.78  | 9.87  | 9.58  | 9.45  | 9.16  | 9.52  | 9.56  | 9.41  | 9.25  | 9.35  | 9.55  | 8.58  | 8.55  | 8.54  | 8.39  | 8.45  | 8.27                  | 0.95 |
| 6               | 201709_s_at    | NM_003634              | NIPSNAP1                   | 0.024941 | 10.40 | 10.54 | 10.44 | 10.24 | 10.22 | 10.07 | 10.31 | 10.32 | 10.14 | 10.18 | 10.17 | 10.22 | 9.65  | 9.55  | 9.50  | 9.77  | 9.49  | 9.38                  | 1.45 |
| 6               | 219664_s_at    | NM_020664              | DEC2                       | 0.014454 | 9.74  | 9.95  | 9.89  | 9.58  | 9.53  | 9.36  | 9.83  | 9.58  | 9.47  | 9.53  | 9.54  | 9.70  | 8.78  | 8.86  | 8.87  | 8.98  | 8.89  | 8.76                  | 1.39 |
| 6               | 224623_at      | BE614567               | THOC3                      | 0.004268 | 9.98  | 10.38 | 10.31 | 9.68  | 9.55  | 9.47  | 9.71  | 9.79  | 9.68  | 9.71  | 9.66  | 9.92  | 8.71  | 8.68  | 8.97  | 8.43  | 8.38  | 8.77                  | 0.96 |
| 6               | 203046_s_at    | NM_003920              | TIMELESS                   | 0.000441 | 9.17  | 9.55  | 9.55  | 8.92  | 8.66  | 8.86  | 9.01  | 9.08  | 9.11  | 9.03  | 9.09  | 9.25  | 8.01  | 7.99  | 8.15  | 7.38  | 7.50  | 7.77                  | 0.76 |
| 6               | 221011_s_at    | NM_030915              | LBH                        | 0.021391 | 11.00 | 11.65 | 11.70 | 10.86 | 10.66 | 10.50 | 10.53 | 10.85 | 10.82 | 10.94 | 11.03 | 11.24 | 9.55  | 9.24  | 9.75  | 9.30  | 9.31  | 9.62                  | 1.32 |
| 6               | 205640_at      | NM_000694              | ALDH3B1                    | 0.028645 | 10.65 | 11.06 | 11.09 | 10.27 | 10.34 | 9.95  | 10.39 | 10.50 | 10.10 | 10.29 | 10.43 | 10.50 | 9.45  | 9.43  | 9.57  | 9.38  | 9.01  | 9.32                  | 1.35 |
| 6               | 218210_at      | NM_024619              | FN3KRP                     | 0.028679 | 9.26  | 9.55  | 9.61  | 9.23  | 9.18  | 8.93  | 9.17  | 9.29  | 8.95  | 9.01  | 9.08  | 9.25  | 8.30  | 8.51  | 8.41  | 8.29  | 8.24  | 8.35                  | 1.23 |
| 6               | 47560_at       | AI525402               | LPHN1                      | 0.031842 | 7.97  | 8.18  | 8.20  | 7.89  | 7.85  | 7.86  | 7.95  | 7.94  | 7.86  | 7.81  | 7.84  | 7.93  | 7.62  | 7.41  | 7.49  | 7.38  | 7.44  | 7.46                  | 1.24 |
| 6               | 219646_at      | NM_017702              | FLJ20186                   | 0.010402 | 8.87  | 8.99  | 9.13  | 8.77  | 8.69  | 8.56  | 8.84  | 8.71  | 8.84  | 8.74  | 8.67  | 8.61  | 8.12  | 7.99  | 8.22  | 8.02  | 8.19  | 8.10                  | 1.27 |
| 6               | 235626_at      | AA835485               | CAMK1D                     | 0.033270 | 9.92  | 10.14 | 10.00 | 9.87  | 9.64  | 9.56  | 10.01 | 9.91  | 10.12 | 9.89  | 10.01 | 9.73  | 8.92  | 8.71  | 9.19  | 8.64  | 8.93  | 8.48                  | 1.11 |
| 6               | 212737_at      | AL513583               | GM2A                       | 0.007190 | 8.49  | 8.70  | 8.80  | 8.40  | 8.58  | 8.14  | 8.83  | 8.85  | 8.74  | 8.40  | 8.46  | 8.36  | 7.55  | 7.71  | 7.60  | 7.48  | 7.53  | 7.75                  | 1.36 |
| 6               | 228456_s_at    | AU151357               | LOC149832                  | 0.017943 | 9.00  | 8.95  | 9.03  | 8.82  | 9.06  | 8.71  | 8.96  | 8.98  | 8.83  | 8.66  | 8.71  | 8.75  | 8.28  | 8.21  | 8.24  | 8.23  | 7.94  | 8.14                  | 1.28 |
| 6               | 227092_at      | AI341383               | ---                        | 0.033815 | 7.96  | 8.22  | 8.26  | 8.21  | 8.13  | 7.47  | 8.23  | 8.14  | 7.84  | 7.77  | 7.59  | 7.81  | 6.77  | 6.68  | 6.67  | 6.59  | 6.51  | 6.68                  | 1.22 |
| 6               | 224435_at      | BC005871               | C10orf58                   | 0.009791 | 9.54  | 9.47  | 9.79  | 9.34  | 9.52  | 8.71  | 9.70  | 9.65  | 9.40  | 9.14  | 9.39  | 9.02  | 8.12  | 7.60  | 8.15  | 7.28  | 7.33  | 7.37                  | 0.93 |
| 6               | 226132_s_at    | AW272422               | MANEAL                     | 0.001837 | 8.70  | 8.87  | 8.81  | 8.66  | 8.56  | 8.19  | 8.82  | 8.71  | 8.67  | 8.53  | 8.38  | 8.25  | 7.73  | 7.65  | 7.56  | 7.23  | 7.40  | 7.42                  | 1.01 |
| 6               | 1558703_at     | AL832613               | MGC9564                    | 0.026140 | 8.13  | 8.02  | 8.15  | 8.02  | 7.99  | 7.88  | 8.10  | 8.04  | 8.04  | 7.93  | 7.96  | 8.03  | 7.75  | 7.65  | 7.69  | 7.67  | 7.63  | 7.68                  | 1.25 |
| 6               | 236009_at      | AI767250               | ---                        | 0.039514 | 7.95  | 8.13  | 7.84  | 7.36  | 7.49  | 7.64  | 8.15  | 7.99  | 8.05  | 7.62  | 7.76  | 7.58  | 7.07  | 7.04  | 7.43  | 6.86  | 6.92  | 7.00                  | 1.66 |
| 6               | 222036_s_at    | AI859865               | MCM4                       | 0.020979 | 8.97  | 9.30  | 9.38  | 8.54  | 8.48  | 8.74  | 9.34  | 9.36  | 9.61  | 9.25  | 9.18  | 9.38  | 8.31  | 7.72  | 8.48  | 7.24  | 7.37  | 7.63                  | 1.47 |
| 6               | 235085_at      | BF739767               | DKFZp761P0423              | 0.038622 | 10.50 | 10.53 | 10.68 | 10.18 | 9.56  | 10.02 | 10.28 | 10.26 | 10.78 | 10.44 | 10.46 | 10.41 | 8.83  | 8.60  | 9.39  | 8.19  | 8.34  | 8.72                  | 1.11 |
| 6               | 212096_s_at    | AL096842               | MTUS1                      | 0.048661 | 11.94 | 12.35 | 12.34 | 11.11 | 11.16 | 11.38 | 11.85 | 11.79 | 12.19 | 11.82 | 11.92 | 12.18 | 10.13 | 10.01 | 10.85 | 9.26  | 9.15  | 10.13                 | 1.12 |
| 6               | 227119_at      | BF103856               | CNOT6L                     | 0.007191 | 7.39  | 7.66  | 7.60  | 7.20  | 7.21  | 7.32  | 7.40  | 7.90  | 7.82  | 7.20  | 7.22  | 7.26  | 6.54  | 6.53  | 6.67  | 6.05  | 6.13  | 6.40                  | 1.21 |
| 6               | 211548_s_at    | J05594                 | HPGD                       | 0.008674 | 9.35  | 9.89  | 9.97  | 8.65  | 8.85  | 9.04  | 9.89  | 9.59  | 10.23 | 9.17  | 9.08  | 9.33  | 7.06  | 7.06  | 7.98  | 6.46  | 6.65  | 7.16                  | 0.96 |
| 6               | 203914_x_at    | NM_000860              | HPGD                       | 0.002862 | 9.96  | 10.20 | 10.07 | 9.19  | 9.27  | 9.50  | 10.25 | 10.09 | 10.49 | 9.59  | 9.54  | 9.60  | 8.07  | 7.70  | 8.46  | 7.01  | 7.07  | 7.88                  | 0.98 |
| 6               | 224445_s_at    | BC005999               | ZFYVE21                    | 0.011505 | 8.86  | 9.11  | 8.96  | 8.76  | 8.63  | 8.64  | 8.97  | 9.02  | 9.09  | 8.72  | 8.79  | 8.79  | 8.27  | 8.17  | 8.45  | 7.91  | 8.05  | 8.18                  | 1.01 |
| 6               | 228489_at      | AI721164               | TM4SF18                    | 0.007540 | 9.55  | 9.92  | 9.76  | 8.82  | 8.72  | 9.28  | 9.25  | 9.04  | 9.60  | 8.93  | 8.67  | 9.02  | 7.78  | 7.49  | 8.28  | 6.76  | 7.10  | 7.00                  | 1.04 |
| 6               | 224944_at      | AL566034               | TMPO                       | 0.016848 | 9.35  | 9.77  | 9.82  | 8.78  | 8.48  | 9.05  | 9.06  | 9.20  | 9.45  | 8.93  | 9.06  | 9.30  | 7.92  | 7.56  | 8.18  | 7.03  | 7.10  | 7.53                  | 0.98 |
| 6               | 212282_at      | BF038366               | MAC30                      | 0.011327 | 11.07 | 11.28 | 11.33 | 10.35 | 10.10 | 10.51 | 10.76 | 10.69 | 11.07 | 10.42 | 10.40 | 10.56 | 9.26  | 9.02  | 9.71  | 8.42  | 8.46  | 9.15                  | 0.97 |
| 6               | 212372_at      | AK026977               | MYH10                      | 0.002241 | 10.18 | 10.42 | 10.36 | 9.65  | 9.58  | 9.78  | 9.90  | 10.01 | 10.29 | 9.52  | 9.50  | 9.62  | 8.66  | 8.34  | 9.02  | 8.17  | 7.85  | 8.26                  | 0.95 |

| K-Mean<br>Order | Probe<br>Names | Gene<br>GBiD | Gene<br>Symbol        | Adj. p-Value<br>≤0.05, |       |       |       |       |       |       |       |       |       |       |       |       |       |       |       |       |       |       | K-Means<br>Similarity |
|-----------------|----------------|--------------|-----------------------|------------------------|-------|-------|-------|-------|-------|-------|-------|-------|-------|-------|-------|-------|-------|-------|-------|-------|-------|-------|-----------------------|
|                 |                |              |                       | Bonferroni             | c1    | c2    | c3    | 6h1   | 6h2   | 6h3   | 12h1  | 12h2  | 12h3  | 24h1  | 24h2  | 24h3  | 48h1  | 48h2  | 48h3  | 72h1  | 72h2  | 72h3  |                       |
| 6               | 218229_s_at    | NM_017542    | POGK                  | 0.013752               | 9.55  | 9.99  | 9.83  | 9.98  | 10.04 | 9.69  | 9.48  | 9.62  | 9.34  | 9.55  | 9.62  | 9.82  | 9.05  | 9.05  | 9.07  | 8.52  | 8.55  | 8.51  | 1.73                  |
| 6               | 218609_s_at    | NM_001161    | NUDT2                 | 0.027196               | 7.79  | 7.80  | 7.87  | 7.90  | 7.92  | 7.96  | 8.13  | 8.07  | 8.00  | 8.08  | 7.95  | 7.97  | 7.50  | 7.49  | 7.69  | 7.47  | 7.55  | 7.43  | 2.09                  |
| 6               | 225653_at      | BF793454     | SMAD2                 | 0.025625               | 8.86  | 9.15  | 9.16  | 8.51  | 8.45  | 8.76  | 8.46  | 8.57  | 8.93  | 8.30  | 8.20  | 8.33  | 8.08  | 8.07  | 8.06  | 7.40  | 7.28  | 7.66  | 1.79                  |
| 6               | 225078_at      | AV686514     | EMP2                  | 0.039337               | 8.46  | 8.60  | 8.60  | 7.92  | 7.87  | 8.25  | 8.15  | 8.13  | 8.58  | 7.91  | 7.78  | 7.97  | 7.49  | 7.49  | 7.48  | 7.16  | 7.22  | 7.33  | 1.70                  |
| 6               | 229053_at      | AI582818     | SYT17                 | 0.047971               | 7.14  | 7.14  | 7.09  | 6.93  | 7.10  | 7.06  | 7.64  | 7.67  | 8.13  | 7.18  | 7.34  | 7.11  | 6.49  | 6.70  | 6.47  | 6.07  | 6.08  | 6.50  | 2.29                  |
| 6               | 229569_at      | AW572379     | ---                   | 0.017492               | 6.58  | 6.96  | 6.88  | 5.97  | 6.22  | 6.24  | 7.27  | 7.21  | 7.75  | 6.82  | 6.76  | 7.20  | 5.86  | 5.74  | 5.99  | 5.69  | 5.51  | 5.45  | 2.25                  |
| 6               | 205698_s_at    | NM_002758    | MAP2K6                | 0.010203               | 8.58  | 8.63  | 8.63  | 8.01  | 8.30  | 8.42  | 9.17  | 9.06  | 9.32  | 9.20  | 9.03  | 9.62  | 8.32  | 8.09  | 8.11  | 7.62  | 7.61  | 7.68  | 2.71                  |
| 6               | 202037_s_at    | NM_003012    | SFRP1                 | 0.012119               | 7.48  | 7.80  | 7.65  | 7.83  | 8.14  | 8.19  | 8.71  | 8.73  | 9.10  | 8.61  | 8.51  | 8.70  | 7.50  | 7.40  | 7.64  | 6.85  | 6.61  | 7.22  | 2.86                  |
| 6               | 201847_at      | NM_000235    | LIPA                  | 0.015369               | 9.60  | 9.75  | 9.76  | 9.87  | 10.05 | 10.23 | 10.48 | 10.46 | 10.91 | 10.60 | 10.68 | 10.76 | 9.33  | 9.30  | 9.79  | 8.59  | 8.51  | 9.00  | 2.58                  |
| 6               | 238654_at      | W79425       | LOC147645             | 0.002231               | 7.82  | 7.92  | 7.80  | 7.65  | 7.65  | 7.78  | 8.34  | 8.56  | 8.56  | 8.45  | 8.40  | 8.36  | 7.62  | 7.54  | 7.72  | 6.96  | 6.91  | 7.34  | 2.70                  |
| 6               | 238977_at      | R54683       | MCM6                  | 0.000274               | 5.76  | 5.72  | 5.67  | 5.46  | 5.49  | 5.53  | 6.37  | 6.24  | 6.34  | 5.91  | 5.79  | 5.96  | 5.51  | 5.46  | 5.51  | 5.46  | 5.48  | 5.30  | 3.45                  |
| 6               | 208969_at      | AF050641     | NDUFA9                | 0.000552               | 10.30 | 10.26 | 10.24 | 10.45 | 10.26 | 9.88  | 10.52 | 10.47 | 10.33 | 10.78 | 10.81 | 10.86 | 9.89  | 9.81  | 10.01 | 9.54  | 9.57  | 9.51  | 2.47                  |
| 6               | 211048_s_at    | BC006344     | PDIA4                 | 0.026842               | 9.55  | 9.80  | 9.89  | 10.47 | 11.00 | 10.43 | 10.51 | 10.46 | 10.80 | 10.95 | 11.09 | 11.34 | 10.07 | 10.05 | 10.21 | 9.42  | 9.30  | 9.32  | 3.70                  |
| 6               | 222584_at      | AL573591     | MSTO1                 | 0.004479               | 8.03  | 8.22  | 8.34  | 8.59  | 8.52  | 8.43  | 8.36  | 8.36  | 8.39  | 8.62  | 8.77  | 8.05  | 7.95  | 8.12  | 7.66  | 7.66  | 7.72  | 2.55  |                       |
| 6               | 218704_at      | NM_017763    | FLJ20315              | 0.045275               | 8.13  | 8.11  | 8.15  | 7.13  | 7.34  | 7.31  | 8.22  | 8.05  | 7.88  | 8.17  | 8.17  | 8.40  | 7.79  | 7.69  | 7.65  | 7.66  | 7.48  | 7.69  | 4.20                  |
| 7               | 223666_at      | BC002724     | C20orf72              | 0.027728               | 8.05  | 8.24  | 8.31  | 8.90  | 8.97  | 8.47  | 8.46  | 8.59  | 8.51  | 8.75  | 8.77  | 8.84  | 8.88  | 8.87  | 8.76  | 9.52  | 9.61  | 9.55  | 2.03                  |
| 7               | 229069_at      | BF477573     | CIP29                 | 0.028460               | 7.64  | 7.29  | 7.19  | 8.00  | 7.87  | 8.14  | 7.78  | 7.69  | 7.93  | 7.95  | 7.77  | 7.77  | 8.19  | 8.32  | 8.11  | 8.85  | 8.72  | 8.86  | 1.58                  |
| 7               | 221490_at      | AL136733     | UBAP1                 | 0.014149               | 9.13  | 9.24  | 9.23  | 9.20  | 9.27  | 9.26  | 8.76  | 9.10  | 9.05  | 9.14  | 9.21  | 9.20  | 9.54  | 9.55  | 9.53  | 9.79  | 9.81  | 9.78  | 1.52                  |
| 7               | 200788_s_at    | NM_003768    | PEA15                 | 0.000082               | 9.71  | 9.74  | 9.67  | 9.87  | 9.66  | 9.87  | 9.22  | 9.45  | 9.37  | 9.69  | 9.64  | 9.62  | 10.21 | 10.27 | 10.21 | 10.64 | 10.52 | 10.65 | 1.41                  |
| 7               | 202796_at      | NM_007286    | SYNPO                 | 0.007025               | 8.43  | 8.42  | 8.43  | 8.54  | 8.57  | 8.35  | 8.08  | 8.26  | 7.87  | 8.41  | 8.31  | 8.38  | 9.06  | 8.84  | 9.11  | 9.50  | 9.29  | 9.63  | 1.65                  |
| 7               | 212971_at      | AI769685     | CARS                  | 0.023990               | 11.07 | 11.23 | 11.17 | 11.38 | 11.22 | 11.65 | 10.34 | 10.39 | 10.87 | 11.16 | 11.13 | 11.22 | 11.69 | 11.73 | 11.97 | 12.31 | 12.48 | 12.80 | 1.63                  |
| 7               | 225527_at      | BE622659     | CEBPG                 | 0.008339               | 8.58  | 8.83  | 8.76  | 8.93  | 8.77  | 9.06  | 8.21  | 8.17  | 8.61  | 8.97  | 9.04  | 9.20  | 9.29  | 9.37  | 9.56  | 9.93  | 10.06 | 10.20 | 1.44                  |
| 7               | 208813_at      | BC000498     | GOT1                  | 0.003266               | 9.11  | 9.38  | 9.32  | 9.25  | 9.30  | 9.42  | 8.79  | 8.69  | 8.98  | 9.33  | 9.31  | 9.56  | 9.71  | 9.80  | 10.07 | 10.64 | 10.59 | 10.39 | 1.54                  |
| 7               | 202402_s_at    | NM_001751    | CARS                  | 0.000004               | 9.23  | 9.16  | 9.11  | 9.36  | 9.18  | 9.47  | 8.87  | 8.75  | 8.96  | 9.52  | 9.47  | 9.40  | 10.16 | 10.01 | 10.12 | 10.90 | 10.82 | 10.71 | 1.07                  |
| 7               | 202719_s_at    | BC001451     | TES                   | 0.006130               | 8.14  | 8.53  | 8.35  | 8.67  | 8.39  | 8.79  | 8.11  | 8.27  | 8.41  | 8.95  | 8.67  | 8.88  | 9.37  | 9.20  | 9.31  | 9.86  | 9.87  | 10.17 | 1.07                  |
| 7               | 200759_x_at    | NM_003204    | NFE2L1                | 0.024385               | 9.61  | 9.46  | 9.48  | 9.81  | 9.95  | 9.62  | 9.47  | 9.51  | 9.34  | 9.60  | 9.69  | 9.56  | 9.94  | 10.10 | 9.95  | 10.28 | 10.35 | 10.32 | 1.52                  |
| 7               | 214179_s_at    | H93013       | NFE2L1                | 0.020632               | 8.96  | 8.93  | 8.91  | 9.39  | 9.35  | 9.07  | 8.87  | 8.88  | 8.82  | 9.15  | 9.14  | 9.05  | 9.34  | 9.51  | 9.31  | 9.71  | 9.86  | 9.72  | 1.59                  |
| 7               | 204203_at      | NM_001806    | CEBPG                 | 0.001340               | 8.26  | 8.32  | 8.32  | 9.31  | 9.20  | 9.77  | 7.95  | 8.06  | 8.76  | 8.97  | 8.88  | 9.03  | 9.73  | 9.71  | 9.81  | 10.97 | 10.94 | 10.84 | 1.11                  |
| 7               | 215499_at      | AA780381     | MAP2K3                | 0.000000               | 8.86  | 8.98  | 8.90  | 9.36  | 9.33  | 9.26  | 8.77  | 8.77  | 8.82  | 9.02  | 9.00  | 8.94  | 9.73  | 9.64  | 9.61  | 10.21 | 10.06 | 10.19 | 1.05                  |
| 7               | 1557466_at     | BC039324     | FLJ31104              | 0.034787               | 6.38  | 6.29  | 6.35  | 6.40  | 6.35  | 6.46  | 6.29  | 6.18  | 6.32  | 6.10  | 6.30  | 6.32  | 6.76  | 6.75  | 6.60  | 6.86  | 6.99  | 6.91  | 1.64                  |
| 7               | 231403_at      | N21108       | ---                   | 0.020732               | 7.87  | 8.21  | 8.06  | 8.45  | 8.11  | 8.61  | 8.05  | 7.89  | 8.29  | 7.98  | 8.20  | 8.11  | 8.80  | 8.67  | 8.98  | 9.50  | 9.69  | 9.80  | 1.25                  |
| 7               | 206307_s_at    | NM_004472    | FOXDI                 | 0.036170               | 7.64  | 7.78  | 7.71  | 8.25  | 7.99  | 8.28  | 7.74  | 7.67  | 8.37  | 8.16  | 8.11  | 8.15  | 8.46  | 8.48  | 8.41  | 9.40  | 9.34  | 9.38  | 1.38                  |
| 7               | 206861_s_at    | NM_003663    | CGGBP1                | 0.008819               | 9.18  | 9.17  | 9.07  | 9.40  | 9.30  | 9.70  | 9.31  | 9.16  | 9.43  | 9.56  | 9.40  | 9.61  | 9.81  | 9.75  | 9.76  | 10.40 | 10.51 | 10.35 | 1.26                  |
| 7               | 223983_s_at    | BC004957     | C19orf12              | 0.001719               | 8.60  | 8.86  | 8.82  | 9.23  | 9.19  | 9.44  | 9.15  | 9.01  | 9.53  | 9.56  | 9.46  | 9.64  | 9.99  | 9.82  | 10.19 | 10.77 | 10.95 | 11.09 | 1.20                  |
| 7               | 223773_s_at    | AF277181     | C1orf79               | 0.031966               | 8.68  | 8.77  | 8.73  | 9.01  | 9.09  | 9.40  | 8.89  | 8.89  | 9.55  | 9.30  | 9.24  | 9.27  | 9.81  | 9.79  | 10.37 | 10.81 | 11.00 | 11.33 | 1.16                  |
| 7               | 208893_s_at    | BC005047     | DUSP6                 | 0.000006               | 7.52  | 7.56  | 7.45  | 8.22  | 8.34  | 8.18  | 7.75  | 7.62  | 7.81  | 8.12  | 8.14  | 8.03  | 8.95  | 9.12  | 9.18  | 8.79  | 8.77  | 8.93  | 1.73                  |
| 7               | 206034_at      | NM_002640    | SERPINB8              | 0.015693               | 7.12  | 6.73  | 6.95  | 7.31  | 7.34  | 7.39  | 7.26  | 7.19  | 7.10  | 7.44  | 7.28  | 7.38  | 7.90  | 8.15  | 7.88  | 7.85  | 7.88  | 7.94  | 1.82                  |
| 7               | 218276_s_at    | NM_021818    | SAV1                  | 0.021674               | 7.95  | 7.72  | 7.68  | 8.42  | 8.35  | 8.58  | 8.05  | 8.24  | 8.52  | 8.68  | 8.53  | 8.28  | 9.41  | 9.27  | 9.78  | 9.68  | 9.64  | 9.33  | 1.46                  |
| 7               | 202760_s_at    | NM_007203    | AKAP2 /// PALM2-AKAP2 | 0.005760               | 7.87  | 8.25  | 7.84  | 9.20  | 8.73  | 9.77  | 8.57  | 8.59  | 9.48  | 9.84  | 9.58  | 9.38  | 11.08 | 11.09 | 11.54 | 11.39 | 11.65 | 11.80 | 1.18                  |
| 7               | 211458_s_at    | AF180519     | GABARAPL1 /// GABARAP | 0.000463               | 8.09  | 8.50  | 8.21  | 9.19  | 9.36  | 9.24  | 8.80  | 8.75  | 9.33  | 9.71  | 9.66  | 9.54  | 10.87 | 11.10 | 11.53 | 11.18 | 11.27 | 11.80 | 1.19                  |
| 7               | 226694_at      | BG540494     | PALM2-AKAP2           | 0.001889               | 8.22  | 8.27  | 8.19  | 9.56  | 9.22  | 9.91  | 8.65  | 8.79  | 9.53  | 9.91  | 10.02 | 9.85  | 11.02 | 11.04 | 11.39 | 11.23 | 11.24 | 11.75 | 1.32                  |
| 7               | 202304_at      | NM_014923    | FNDC3A                | 0.014155               | 7.59  | 7.98  | 7.84  | 8.77  | 8.75  | 9.38  | 7.93  | 8.37  | 9.15  | 9.35  | 9.48  | 9.52  | 10.50 | 10.61 | 11.14 | 10.79 | 10.84 | 10.93 | 1.45                  |
| 7               | 231899_at      | AB051513     | ZC3H12C               | 0.000759               | 6.52  | 6.69  | 6.54  | 7.96  | 7.54  | 8.08  | 6.91  | 7.17  | 7.89  | 8.07  | 8.21  | 8.02  | 9.77  | 9.84  | 10.17 | 9.58  | 9.66  | 10.13 | 1.39                  |
| 7               | 222549_at      | AF101051     | CLDN1                 | 0.005665               | 8.18  | 8.30  | 8.41  | 9.06  | 8.91  | 9.49  | 8.71  | 8.53  | 9.09  | 9.36  | 9.37  | 9.42  | 9.96  | 10.12 | 10.16 | 10.21 | 10.11 | 10.12 | 1.58                  |
| 7               | 210105_s_at    | M14333       | FYN                   | 0.000012               | 7.75  | 7.95  | 7.52  | 9.22  | 8.46  | 8.97  | 8.13  | 8.08  | 8.54  | 9.81  | 9.78  | 9.55  | 11.21 | 11.05 | 11.42 | 11.67 | 11.97 | 12.12 | 1.10                  |
| 7               | 222529_at      | BG251467     | SLC25A37              | 0.001095               | 8.02  | 8.21  | 8.04  | 9.38  | 9.06  | 9.33  | 8.90  | 8.73  | 9.53  | 9.48  | 9.47  | 9.33  | 10.21 | 10.07 | 10.41 | 10.96 | 11.05 | 10.75 | 1.34                  |
| 7               | 242819_at      | AA001150     | ---                   | 0.042619               | 4.95  | 5.11  | 4.92  | 5.45  | 5.19  | 5.69  | 5.29  | 5.49  | 5.55  | 5.53  | 5.44  | 5.30  | 6.24  | 6.28  | 6.25  | 6.07  | 6.26  | 6.46  | 1.59                  |
| 7               | 226206_at      | BG231691     | MAFK                  | 0.009166               | 10.07 | 10.32 | 10.40 | 11.14 | 11.10 | 10.92 | 10.23 | 10.58 | 10.55 | 11.04 | 11.26 | 10.96 | 11.47 | 11.46 | 11.55 | 11.43 | 11.50 | 11.45 | 2.11                  |
| 7               | 1558290_a_at   | BG200951     | PVT1 /// LOC441378    | 0.026524               | 9.51  | 9.69  | 9.59  | 10.18 | 10.25 | 10.02 | 9.75  | 9.93  | 9.75  | 10.13 | 10.26 | 10.23 | 10.42 | 10.55 | 10.58 | 10.47 | 10.48 | 10.77 | 1.90                  |
| 7               | 222690_s_at    | AA194996     | TMEM39A               | 0.007677               | 8.47  | 8.60  | 8.75  | 9.07  | 9.19  | 9.27  | 8.54  | 8.67  | 8.80  | 9.28  | 9.21  | 9.32  | 9.56  | 9.65  | 9.92  | 9.81  | 9.85  | 9.82  | 1.47                  |
| 7               | 209295_at      | AF016266     | TNFRSF10B             | 0.001140               | 10.13 | 10.19 | 10.29 | 11.32 | 11.10 | 11.33 | 10.42 | 10.72 | 11.06 | 11.26 | 11.70 | 11.51 | 11.96 | 11.96 | 12.27 | 12.20 | 12.21 | 12.29 | 1.74                  |
| 7               | 232674_at</    |              |                       |                        |       |       |       |       |       |       |       |       |       |       |       |       |       |       |       |       |       |       |                       |

| K-Mean<br>Order | Probe<br>Names | GBiD      | Gene<br>Symbol | Adj. p-Value<br>≤0.05, |       |       |       |       |       |       |       |       |       |       |       |       |       |       |       |       |       |       | K-Means<br>Similarity |
|-----------------|----------------|-----------|----------------|------------------------|-------|-------|-------|-------|-------|-------|-------|-------|-------|-------|-------|-------|-------|-------|-------|-------|-------|-------|-----------------------|
|                 |                |           |                | Bonferroni             | c1    | c2    | c3    | 6h1   | 6h2   | 6h3   | 12h1  | 12h2  | 12h3  | 24h1  | 24h2  | 24h3  | 48h1  | 48h2  | 48h3  | 72h1  | 72h2  | 72h3  |                       |
| 7               | 226989_at      | BE855765  | RGMB           | 0.000728               | 7.68  | 7.98  | 7.79  | 8.15  | 8.29  | 8.03  | 8.09  | 8.18  | 8.36  | 8.39  | 8.43  | 8.33  | 8.71  | 8.80  | 8.74  | 9.25  | 9.51  | 9.43  | 1.36                  |
| 7               | 206139_at      | NM_002651 | PIK4CB         | 0.029625               | 8.10  | 8.02  | 7.93  | 8.13  | 8.42  | 8.25  | 7.92  | 8.01  | 8.08  | 8.19  | 8.28  | 8.15  | 8.65  | 8.61  | 8.57  | 8.73  | 8.94  | 9.04  | 1.07                  |
| 7               | 209238_at      | BE966922  | STX3A          | 0.000083               | 8.56  | 8.71  | 8.62  | 9.27  | 9.14  | 9.28  | 8.76  | 8.94  | 8.85  | 9.08  | 9.18  | 9.19  | 9.52  | 9.63  | 9.65  | 9.92  | 9.90  | 10.13 | 0.90                  |
| 7               | 224833_at      | BE218980  | ETS1           | 0.001076               | 7.21  | 7.40  | 7.29  | 7.99  | 7.89  | 8.66  | 7.06  | 7.39  | 8.10  | 8.49  | 8.42  | 8.26  | 9.91  | 9.80  | 9.94  | 10.76 | 10.46 | 10.64 | 0.75                  |
| 7               | 202684_s_at    | AB020966  | RNMT           | 0.003013               | 4.85  | 4.91  | 4.94  | 5.52  | 5.43  | 6.00  | 4.94  | 5.20  | 5.53  | 5.65  | 5.60  | 5.77  | 6.64  | 6.49  | 6.82  | 7.13  | 7.32  | 7.68  | 0.65                  |
| 7               | 203556_at      | NM_014943 | ZHX2           | 0.000005               | 7.99  | 8.25  | 8.40  | 8.61  | 8.72  | 8.71  | 8.08  | 8.19  | 8.47  | 8.83  | 8.80  | 8.67  | 9.86  | 9.86  | 9.90  | 10.47 | 10.55 | 10.42 | 0.65                  |
| 7               | 215440_s_at    | AL523320  | BEXL1          | 0.000002               | 5.53  | 5.41  | 5.62  | 5.81  | 5.85  | 5.92  | 5.55  | 5.71  | 5.69  | 5.86  | 5.90  | 5.87  | 6.39  | 6.44  | 6.39  | 6.88  | 6.83  | 6.83  | 0.65                  |
| 7               | 218627_at      | NM_018370 | FLJ11259       | 0.046593               | 8.13  | 8.46  | 8.42  | 8.75  | 8.87  | 9.04  | 8.27  | 8.48  | 8.79  | 9.03  | 9.00  | 8.99  | 9.55  | 9.65  | 9.89  | 9.82  | 9.67  | 10.17 | 1.17                  |
| 7               | 219474_at      | NM_024616 | TTMP           | 0.012224               | 7.01  | 6.96  | 7.11  | 7.49  | 7.31  | 7.56  | 6.87  | 7.25  | 7.33  | 7.40  | 7.49  | 7.41  | 8.16  | 8.17  | 8.25  | 8.24  | 8.25  | 8.62  | 0.96                  |
| 7               | 213931_at      | AI819238  | ID2 /// ID2B   | 0.027321               | 6.54  | 6.84  | 6.33  | 7.18  | 6.69  | 7.11  | 6.58  | 6.45  | 6.66  | 6.56  | 6.35  | 6.52  | 8.39  | 7.89  | 8.63  | 9.39  | 10.09 | 8.77  | 1.41                  |
| 7               | 223302_s_at    | BC004288  | ZNF655         | 0.010272               | 8.71  | 8.61  | 8.54  | 9.04  | 9.05  | 9.32  | 8.91  | 8.94  | 9.16  | 9.06  | 9.01  | 9.24  | 9.78  | 9.88  | 9.77  | 10.55 | 10.56 | 10.00 | 1.17                  |
| 7               | 221843_s_at    | AA195017  | KIAA1609       | 0.002737               | 7.60  | 7.61  | 7.31  | 7.87  | 7.79  | 7.90  | 7.63  | 7.59  | 7.76  | 7.67  | 7.69  | 7.69  | 8.39  | 8.36  | 8.38  | 8.54  | 8.73  | 8.92  | 0.89                  |
| 7               | 232216_at      | AA828049  | YME1L1         | 0.002389               | 8.19  | 8.21  | 7.52  | 8.72  | 8.48  | 8.88  | 8.42  | 8.21  | 8.72  | 8.61  | 8.77  | 8.47  | 9.81  | 9.88  | 9.81  | 10.38 | 10.57 | 10.47 | 0.92                  |
| 7               | 200842_s_at    | AI475965  | EPRS           | 0.014956               | 10.37 | 10.55 | 10.41 | 10.95 | 10.86 | 11.29 | 10.37 | 10.43 | 10.92 | 10.71 | 10.68 | 10.52 | 11.76 | 11.58 | 11.91 | 12.01 | 12.22 | 12.33 | 0.90                  |
| 7               | 204823_at      | NM_014903 | NAV3           | 0.001820               | 7.93  | 7.60  | 7.54  | 8.91  | 8.63  | 9.38  | 7.91  | 8.33  | 8.66  | 8.27  | 8.39  | 8.18  | 10.11 | 10.28 | 10.66 | 10.72 | 11.18 | 11.49 | 0.89                  |
| 7               | 242005_at      | BE877420  | ---            | 0.001121               | 5.56  | 5.63  | 5.51  | 6.31  | 6.04  | 6.93  | 5.73  | 5.81  | 6.27  | 5.85  | 5.83  | 5.82  | 7.43  | 7.76  | 8.06  | 8.54  | 9.10  | 9.13  | 0.87                  |
| 7               | 225481_at      | AL040051  | FRMD6          | 0.009847               | 6.83  | 6.92  | 6.96  | 7.95  | 7.65  | 8.46  | 6.81  | 7.07  | 8.12  | 7.48  | 7.29  | 7.26  | 8.95  | 8.98  | 9.68  | 10.47 | 10.73 | 10.76 | 0.89                  |
| 7               | 240126_x_at    | AI733360  | LOC440461      | 0.000017               | 6.72  | 6.80  | 6.71  | 7.28  | 7.24  | 7.45  | 7.05  | 7.07  | 7.13  | 7.24  | 7.13  | 7.12  | 8.09  | 7.79  | 7.98  | 8.48  | 8.72  | 8.77  | 0.76                  |
| 7               | 222735_at      | AW452608  | TMEM38B        | 0.000378               | 7.12  | 7.16  | 7.28  | 7.87  | 7.79  | 8.36  | 7.88  | 7.72  | 7.85  | 7.82  | 7.51  | 7.80  | 8.95  | 8.93  | 9.16  | 9.63  | 10.20 | 10.09 | 1.00                  |
| 7               | 225464_at      | N30138    | FRMD6          | 0.001523               | 6.61  | 6.89  | 6.74  | 7.90  | 7.67  | 8.53  | 7.10  | 7.31  | 7.91  | 7.50  | 7.51  | 7.42  | 8.74  | 8.64  | 9.16  | 10.39 | 10.64 | 10.20 | 1.00                  |
| 7               | 218772_x_at    | NM_018112 | TMEM38B        | 0.016709               | 7.67  | 7.68  | 7.81  | 8.55  | 8.44  | 9.16  | 8.47  | 8.21  | 8.99  | 8.22  | 8.29  | 8.57  | 9.13  | 9.27  | 9.62  | 10.42 | 10.57 | 10.86 | 1.37                  |
| 7               | 203184_at      | NM_001999 | FBN2           | 0.044391               | 7.93  | 8.13  | 8.14  | 8.43  | 8.10  | 8.86  | 7.72  | 8.06  | 8.48  | 8.00  | 7.92  | 7.91  | 9.15  | 9.18  | 9.30  | 9.73  | 9.94  | 9.89  | 1.28                  |
| 7               | 238563_at      | AV762916  | ABI1           | 0.021383               | 6.58  | 6.80  | 6.62  | 6.94  | 6.54  | 7.33  | 6.40  | 6.23  | 7.02  | 6.64  | 6.57  | 6.45  | 8.00  | 7.92  | 7.91  | 8.58  | 9.03  | 8.70  | 1.23                  |
| 7               | 209301_at      | M36532    | CA2            | 0.015266               | 5.51  | 5.88  | 5.92  | 5.86  | 6.27  | 6.29  | 5.67  | 5.96  | 6.47  | 5.80  | 5.64  | 6.03  | 7.10  | 7.40  | 7.39  | 7.77  | 8.22  | 8.07  | 1.25                  |
| 7               | 215743_at      | AL134489  | NMT2           | 0.009007               | 5.67  | 5.40  | 5.51  | 5.87  | 5.60  | 6.10  | 5.56  | 5.54  | 5.87  | 5.67  | 5.94  | 5.98  | 7.06  | 6.96  | 6.74  | 7.79  | 7.17  | 7.70  | 1.11                  |
| 7               | 221985_at      | AW006750  | KLHL24         | 0.017230               | 6.89  | 7.06  | 7.10  | 7.32  | 7.29  | 7.48  | 7.30  | 7.22  | 6.99  | 7.26  | 7.17  | 7.11  | 7.68  | 7.68  | 7.51  | 7.99  | 8.08  | 8.16  | 1.36                  |
| 7               | 222573_s_at    | AI679398  | SAV1           | 0.001218               | 7.47  | 7.76  | 7.70  | 8.09  | 8.04  | 7.96  | 7.97  | 7.91  | 7.70  | 8.10  | 7.89  | 7.96  | 8.57  | 8.70  | 8.61  | 9.18  | 9.17  | 8.91  | 1.14                  |
| 7               | 203821_at      | NM_001945 | HBEGF          | 0.005002               | 7.58  | 7.49  | 7.63  | 7.83  | 7.94  | 7.87  | 7.80  | 7.84  | 7.59  | 7.68  | 7.98  | 7.81  | 8.45  | 8.45  | 8.24  | 8.75  | 8.60  | 8.73  | 1.25                  |
| 7               | 238633_at      | W93523    | EPC1           | 0.005167               | 6.41  | 6.42  | 6.28  | 7.10  | 6.94  | 7.37  | 6.43  | 6.57  | 6.57  | 6.55  | 6.69  | 6.58  | 7.17  | 7.28  | 7.30  | 7.45  | 7.71  | 7.64  | 1.52                  |
| 7               | 204977_at      | NM_004398 | DDX10          | 0.000076               | 9.45  | 9.47  | 9.46  | 10.67 | 10.60 | 10.93 | 9.10  | 9.28  | 9.59  | 10.08 | 10.16 | 10.17 | 10.89 | 11.06 | 11.09 | 11.11 | 11.15 | 11.28 | 1.83                  |
| 7               | 225204_at      | AA521311  | TA-PP2C        | 0.013930               | 9.25  | 9.61  | 9.42  | 10.05 | 9.93  | 10.12 | 9.24  | 9.18  | 9.39  | 9.56  | 9.33  | 9.59  | 9.81  | 9.74  | 9.88  | 10.40 | 10.69 | 10.72 | 2.12                  |
| 7               | 212816_s_at    | BE613178  | CBS            | 0.001432               | 7.97  | 8.26  | 8.26  | 8.56  | 8.53  | 8.43  | 7.62  | 7.64  | 7.37  | 7.89  | 7.94  | 8.03  | 8.36  | 8.48  | 8.52  | 8.88  | 8.87  | 8.94  | 2.65                  |
| 7               | 1553972_a_at   | BC007257  | CBS            | 0.000023               | 8.75  | 8.85  | 8.88  | 9.11  | 9.25  | 9.17  | 8.42  | 8.48  | 8.44  | 8.62  | 8.60  | 8.68  | 9.16  | 9.22  | 9.16  | 9.71  | 9.74  | 9.51  | 2.19                  |
| 7               | 201475_x_at    | NM_004990 | MARS           | 0.0000581              | 10.47 | 10.86 | 10.82 | 11.43 | 11.47 | 11.36 | 10.17 | 10.36 | 10.38 | 10.71 | 10.75 | 10.80 | 11.20 | 11.35 | 11.48 | 11.83 | 11.86 | 11.86 | 2.14                  |
| 7               | 218145_at      | NM_021158 | TRIB3          | 0.000028               | 11.82 | 11.61 | 11.62 | 12.43 | 12.20 | 12.13 | 10.86 | 10.81 | 10.83 | 12.14 | 12.25 | 12.16 | 12.18 | 12.23 | 12.42 | 12.58 | 12.57 | 12.54 | 3.05                  |
| 8               | 228642_at      | BF593636  | ---            | 0.018107               | 8.50  | 8.29  | 7.91  | 8.98  | 8.85  | 8.99  | 8.89  | 8.75  | 9.07  | 8.67  | 8.61  | 8.34  | 9.06  | 9.02  | 9.06  | 9.90  | 10.32 | 10.18 | 2.01                  |
| 8               | 221486_at      | AF067170  | ENSA           | 0.006161               | 8.84  | 9.01  | 9.02  | 8.90  | 9.05  | 8.96  | 8.69  | 8.74  | 8.78  | 8.99  | 8.92  | 9.05  | 9.28  | 9.35  | 9.41  | 9.65  | 9.63  | 9.89  | 1.41                  |
| 8               | 1552580_at     | NM_173553 | FLJ25801       | 0.000485               | 7.19  | 7.20  | 7.48  | 7.91  | 8.04  | 7.39  | 7.43  | 7.15  | 7.08  | 7.53  | 7.47  | 7.69  | 8.53  | 8.52  | 8.14  | 10.28 | 9.85  | 10.13 | 1.17                  |
| 8               | 224669_at      | AI096624  | C20orf35       | 0.001694               | 8.37  | 8.56  | 8.54  | 8.64  | 8.93  | 8.67  | 8.34  | 8.48  | 8.49  | 8.56  | 8.47  | 8.60  | 8.86  | 8.97  | 8.89  | 9.55  | 9.50  | 9.54  | 1.40                  |
| 8               | 213524_s_at    | NM_015714 | G0S2           | 0.020516               | 7.94  | 7.83  | 7.88  | 7.70  | 7.83  | 7.62  | 7.83  | 7.75  | 7.81  | 7.80  | 7.94  | 7.68  | 8.80  | 8.16  | 8.78  | 9.14  | 9.33  | 9.17  | 1.34                  |
| 8               | 237440_at      | N39590    | ---            | 0.004729               | 6.89  | 6.90  | 7.00  | 6.72  | 6.74  | 6.60  | 6.76  | 6.81  | 6.91  | 6.85  | 6.88  | 6.97  | 7.16  | 7.03  | 7.21  | 7.47  | 7.46  | 7.52  | 1.46                  |
| 8               | 1557543_at     | AL832672  | NOTCH2         | 0.029547               | 5.88  | 6.27  | 6.02  | 5.58  | 5.84  | 5.80  | 5.73  | 5.88  | 6.32  | 5.76  | 5.84  | 5.87  | 6.50  | 6.46  | 6.83  | 7.42  | 7.68  | 7.34  | 1.29                  |
| 8               | 214035_x_at    | AA308853  | LOC399491      | 0.008137               | 11.19 | 11.28 | 11.26 | 10.91 | 10.94 | 10.94 | 10.91 | 10.92 | 10.99 | 10.92 | 11.09 | 11.03 | 11.34 | 11.54 | 11.58 | 11.65 | 11.66 | 11.86 | 1.87                  |
| 8               | 221501_x_at    | AF229069  | LOC339047      | 0.042534               | 11.26 | 11.59 | 11.40 | 11.01 | 10.99 | 11.16 | 11.03 | 11.10 | 11.22 | 11.13 | 11.28 | 11.34 | 11.61 | 11.68 | 11.76 | 11.98 | 12.00 | 12.24 | 1.65                  |
| 8               | 226114_at      | AI829509  | ZNF436         | 0.001754               | 7.17  | 7.30  | 7.38  | 6.96  | 7.00  | 7.15  | 6.87  | 7.05  | 7.14  | 7.13  | 7.24  | 7.27  | 7.75  | 7.61  | 7.66  | 8.24  | 8.06  | 8.14  | 1.33                  |
| 8               | 220230_s_at    | NM_016229 | CYB5R2         | 0.001906               | 6.56  | 6.57  | 6.49  | 6.27  | 6.38  | 6.35  | 6.28  | 6.35  | 6.15  | 6.31  | 6.49  | 6.39  | 6.89  | 7.01  | 6.69  | 7.46  | 7.37  | 7.63  | 1.10                  |
| 8               | 202962_at      | NM_015254 | KIF13B         | 0.000486               | 7.97  | 8.12  | 8.12  | 7.93  | 7.86  | 7.78  | 7.79  | 7.91  | 7.80  | 7.80  | 7.93  | 7.96  | 8.39  | 8.46  | 8.38  | 8.86  | 8.77  | 9.03  | 1.18                  |
| 8               | 205489_at      | NM_001888 | CRYM           | 0.030354               | 8.24  | 8.19  | 8.12  | 7.77  | 7.91  | 7.89  | 8.09  | 8.03  | 7.76  | 7.97  | 8.10  | 8.04  | 8.52  | 8.34  | 8.38  | 8.81  | 8.69  | 8.87  | 1.69                  |
| 8               | 244397_at      | N63384    | ---            | 0.001331               | 6.60  | 6.50  | 6.45  | 6.37  | 6.54  | 6.57  | 6.52  | 6.55  | 6.41  | 6.43  | 6.11  | 6.16  | 7.01  | 7.16  | 6.92  | 7.50  | 7.57  | 7.61  | 1.42                  |
| 8               | 224836_at      | AL109824  | TP53INP2       | 0.000150               | 8.34  | 8.62  | 8.38  | 8.35  | 8.33  | 8.43  | 8.14  | 8.13  | 8.30  | 8.11  | 8.15  | 8.18  | 8.82  | 8.97  | 9.08  | 9.48  | 9.43  | 9.48  | 1.37                  |
| 8               | 244287_at      | R94399    | SFRS12         | 0.043062               | 7.21  | 7.46  | 7.19  | 6.93  | 6.91  | 7.03  | 6.82  | 6.85  | 6.80  | 6.90  | 6.96  | 7.02  | 7.63  | 7.70  | 7.39  | 8.11  | 7.99  | 7.70  | 2.03                  |
| 8               | 226461_at      | AA204719  | HOXB9          | 0.009404               | 8.49  | 8.53  | 8.28  | 8.    |       |       |       |       |       |       |       |       |       |       |       |       |       |       |                       |

| K-Mean<br>Order | Probe<br>Names | Gene<br>Symbol | Adj. p-Value<br>≤0.05,<br>Bonferroni |          |      |      |      |      |      |      |      |      |      |      |      |      |      |      |      |       |       |       | K-Means<br>Similarity |
|-----------------|----------------|----------------|--------------------------------------|----------|------|------|------|------|------|------|------|------|------|------|------|------|------|------|------|-------|-------|-------|-----------------------|
|                 |                |                |                                      | c1       | c2   | c3   | 6h1  | 6h2  | 6h3  | 12h1 | 12h2 | 12h3 | 24h1 | 24h2 | 24h3 | 48h1 | 48h2 | 48h3 | 72h1 | 72h2  | 72h3  |       |                       |
| 8               | 206675_s_at    | NM_005414      | SKIL                                 | 0.000503 | 4.95 | 4.87 | 4.88 | 4.88 | 4.84 | 4.93 | 4.85 | 4.81 | 5.08 | 4.96 | 5.06 | 5.19 | 5.21 | 4.98 | 5.67 | 5.79  | 5.71  | 1.07  |                       |
| 8               | 218724_s_at    | NM_021809      | TGIF2                                | 0.000263 | 6.38 | 6.03 | 6.12 | 6.19 | 6.33 | 6.22 | 6.38 | 6.16 | 6.28 | 6.73 | 6.59 | 6.54 | 6.96 | 6.99 | 6.72 | 7.93  | 8.15  | 7.87  | 1.12                  |
| 8               | 206412_at      | NM_005246      | FER                                  | 0.003633 | 8.16 | 8.08 | 8.14 | 8.08 | 8.09 | 8.14 | 8.16 | 8.11 | 8.18 | 8.18 | 8.26 | 8.17 | 8.22 | 8.38 | 8.27 | 8.60  | 8.69  | 8.65  | 1.03                  |
| 8               | 206029_s_at    | NM_014391      | ANKRD1                               | 0.036375 | 5.18 | 4.71 | 4.90 | 5.01 | 4.84 | 4.96 | 4.97 | 4.91 | 5.03 | 5.07 | 5.01 | 4.99 | 5.37 | 5.73 | 5.31 | 6.09  | 6.16  | 6.12  | 1.13                  |
| 8               | 229158_at      | AW082836       | WNK4                                 | 0.002829 | 6.35 | 6.31 | 6.27 | 6.24 | 6.32 | 6.32 | 6.24 | 6.20 | 6.20 | 6.39 | 6.31 | 6.25 | 6.57 | 6.49 | 6.51 | 7.04  | 6.85  | 7.12  | 0.94                  |
| 8               | 203068_at      | NM_014851      | KLHL21                               | 0.000255 | 7.63 | 7.59 | 7.51 | 7.61 | 7.38 | 7.45 | 7.52 | 7.45 | 7.44 | 7.73 | 7.62 | 7.54 | 8.04 | 8.08 | 7.97 | 8.79  | 8.54  | 8.76  | 0.88                  |
| 8               | 234141_s_at    | AK024295       | LOC286059                            | 0.018351 | 7.31 | 7.12 | 7.24 | 7.24 | 7.29 | 7.14 | 7.21 | 7.18 | 7.05 | 7.23 | 7.22 | 7.16 | 7.55 | 7.62 | 7.43 | 8.03  | 7.90  | 8.21  | 1.06                  |
| 8               | 233762_at      | AU158436       | ---                                  | 0.010572 | 6.51 | 6.35 | 6.46 | 6.29 | 6.45 | 6.20 | 6.41 | 6.42 | 6.28 | 6.50 | 6.48 | 6.41 | 6.66 | 6.83 | 6.53 | 7.26  | 7.42  | 7.28  | 1.12                  |
| 8               | 223913_s_at    | AB058892       | C19orf30                             | 0.000341 | 5.66 | 5.58 | 5.49 | 5.45 | 5.63 | 5.50 | 5.77 | 5.65 | 5.52 | 5.47 | 5.65 | 5.48 | 6.11 | 6.22 | 5.86 | 7.01  | 7.17  | 7.00  | 0.89                  |
| 8               | 205013_s_at    | NM_000675      | ADORA2A                              | 0.000094 | 6.97 | 6.96 | 7.00 | 7.00 | 6.88 | 6.86 | 6.99 | 6.85 | 6.79 | 6.96 | 7.09 | 7.15 | 7.33 | 7.53 | 7.31 | 8.31  | 8.60  | 8.65  | 0.71                  |
| 8               | 229430_at      | AI421311       | C8orf46                              | 0.000000 | 5.41 | 5.27 | 5.29 | 5.19 | 5.24 | 5.27 | 5.39 | 5.43 | 5.33 | 5.35 | 5.48 | 5.44 | 5.90 | 5.91 | 5.92 | 6.78  | 6.94  | 6.98  | 0.53                  |
| 8               | 213556_at      | BE673445       | LOC390940                            | 0.000037 | 6.66 | 6.61 | 6.53 | 6.48 | 6.53 | 6.27 | 6.78 | 6.73 | 6.44 | 6.75 | 6.76 | 6.83 | 7.36 | 7.44 | 7.22 | 8.45  | 8.65  | 8.85  | 0.75                  |
| 8               | 235818_at      | AI498747       | UNQ3033                              | 0.000798 | 5.70 | 5.49 | 5.58 | 5.59 | 5.66 | 5.53 | 5.70 | 5.72 | 5.56 | 5.72 | 5.74 | 5.69 | 5.99 | 6.23 | 5.90 | 6.77  | 6.81  | 6.99  | 0.84                  |
| 8               | 207147_at      | NM_004405      | DLX2                                 | 0.000076 | 5.39 | 5.29 | 5.25 | 5.43 | 5.30 | 5.52 | 5.38 | 5.35 | 5.43 | 5.28 | 5.37 | 5.43 | 5.70 | 5.82 | 5.64 | 6.83  | 6.76  | 7.12  | 0.82                  |
| 8               | 219758_at      | NM_024926      | FLJ12571                             | 0.000000 | 6.92 | 7.03 | 7.02 | 7.02 | 7.09 | 7.24 | 6.73 | 6.82 | 6.88 | 6.92 | 6.77 | 6.91 | 7.70 | 7.88 | 7.57 | 9.36  | 9.26  | 9.44  | 0.65                  |
| 8               | 208561_at      | NM_020297      | ABCC9                                | 0.000124 | 4.63 | 4.44 | 4.48 | 4.40 | 4.58 | 4.61 | 4.51 | 4.63 | 4.49 | 4.59 | 4.58 | 4.61 | 5.10 | 5.59 | 5.18 | 6.99  | 6.52  | 6.95  | 0.73                  |
| 8               | 240407_at      | AW450035       | ---                                  | 0.000055 | 5.75 | 5.68 | 5.62 | 5.78 | 5.81 | 5.71 | 5.70 | 5.71 | 5.68 | 5.74 | 5.73 | 5.70 | 5.93 | 6.23 | 6.02 | 6.77  | 6.85  | 6.90  | 0.73                  |
| 8               | 229774_at      | R41728         | CXXC4                                | 0.001994 | 5.87 | 5.62 | 5.73 | 5.65 | 5.87 | 5.69 | 5.76 | 5.85 | 5.88 | 5.87 | 5.94 | 5.63 | 6.39 | 6.39 | 6.20 | 7.45  | 7.08  | 7.13  | 1.03                  |
| 8               | 1556545_at     | AK056941       | ---                                  | 0.000095 | 6.08 | 5.96 | 6.07 | 5.98 | 5.95 | 5.87 | 5.98 | 6.20 | 5.98 | 6.04 | 6.04 | 5.85 | 6.52 | 6.47 | 6.32 | 7.78  | 7.51  | 7.46  | 0.96                  |
| 8               | 213519_s_at    | AI078169       | LAMA2                                | 0.002190 | 6.92 | 6.79 | 6.95 | 6.97 | 6.85 | 6.95 | 7.01 | 6.88 | 6.82 | 7.00 | 6.93 | 6.87 | 7.53 | 7.42 | 7.30 | 8.01  | 8.33  | 7.97  | 0.98                  |
| 8               | 232020_at      | BF433689       | NSUN6                                | 0.000001 | 7.14 | 7.11 | 7.00 | 6.99 | 6.73 | 6.91 | 7.10 | 6.98 | 7.17 | 7.06 | 7.07 | 7.11 | 8.19 | 8.23 | 8.06 | 9.74  | 10.18 | 9.63  | 0.63                  |
| 8               | 207442_at      | NM_000759      | CSF3                                 | 0.000106 | 8.01 | 7.88 | 7.80 | 7.92 | 7.97 | 7.92 | 8.05 | 7.85 | 7.72 | 8.02 | 8.05 | 7.88 | 8.62 | 8.74 | 8.51 | 9.40  | 9.43  | 9.26  | 0.96                  |
| 8               | 1570388_a_at   | BC032955       | LOC401528 /// LOC401530              | 0.000089 | 6.07 | 5.85 | 5.86 | 5.79 | 6.02 | 5.74 | 6.04 | 5.93 | 5.80 | 6.12 | 6.10 | 6.09 | 8.05 | 8.57 | 7.29 | 10.36 | 10.60 | 9.88  | 0.89                  |
| 8               | 214229_at      | AL122077       | DNAH17                               | 0.015539 | 6.37 | 6.21 | 6.27 | 6.15 | 6.22 | 6.12 | 6.27 | 6.16 | 5.96 | 6.28 | 6.38 | 6.16 | 6.72 | 6.92 | 6.55 | 7.43  | 7.26  | 7.19  | 1.28                  |
| 8               | 209270_at      | L25541         | LAMB3                                | 0.000004 | 7.72 | 7.80 | 7.80 | 7.73 | 7.54 | 7.21 | 7.50 | 7.47 | 7.36 | 7.47 | 7.66 | 7.51 | 8.39 | 8.78 | 8.57 | 9.93  | 10.06 | 9.76  | 0.85                  |
| 8               | 233999_s_at    | AL137393       | FLJ12571                             | 0.006662 | 6.59 | 6.68 | 6.77 | 6.50 | 6.47 | 6.60 | 6.49 | 6.62 | 6.50 | 6.63 | 6.59 | 6.54 | 7.54 | 7.69 | 7.22 | 8.83  | 8.57  | 8.02  | 1.22                  |
| 8               | 1553293_at     | NM_054031      | MRGPRX3                              | 0.019660 | 5.00 | 4.93 | 5.00 | 4.97 | 5.00 | 4.97 | 4.97 | 5.00 | 5.05 | 5.15 | 5.01 | 5.10 | 5.44 | 5.53 | 5.39 | 5.98  | 6.06  | 5.63  | 1.34                  |
| 8               | 243447_at      | AI051185       | RYR2                                 | 0.002956 | 7.25 | 7.20 | 7.28 | 7.38 | 7.38 | 7.32 | 7.23 | 7.33 | 7.33 | 7.40 | 7.42 | 7.27 | 8.00 | 7.76 | 7.85 | 8.46  | 8.58  | 8.17  | 1.27                  |
| 8               | 231214_at      | BF224377       | ---                                  | 0.001186 | 6.31 | 6.03 | 6.31 | 6.35 | 6.44 | 6.34 | 6.36 | 6.32 | 6.34 | 6.46 | 6.62 | 6.42 | 7.13 | 7.07 | 6.77 | 7.70  | 7.83  | 7.59  | 1.19                  |
| 8               | 220533_at      | NM_024853      | ---                                  | 0.000021 | 6.80 | 6.63 | 6.54 | 6.63 | 6.65 | 6.61 | 6.61 | 6.75 | 6.53 | 6.73 | 6.75 | 6.63 | 7.56 | 7.74 | 7.79 | 8.29  | 8.65  | 8.66  | 0.93                  |
| 8               | 205798_at      | NM_002185      | IL7R                                 | 0.000014 | 7.14 | 6.83 | 6.69 | 7.00 | 6.89 | 7.11 | 7.20 | 7.10 | 6.91 | 7.24 | 7.28 | 6.99 | 8.47 | 8.55 | 8.47 | 9.75  | 10.40 | 10.03 | 0.82                  |
| 8               | 243423_at      | AF150368       | ---                                  | 0.002625 | 8.54 | 7.92 | 7.90 | 8.09 | 8.33 | 8.33 | 8.35 | 8.63 | 8.15 | 8.56 | 8.47 | 8.45 | 9.35 | 9.35 | 9.32 | 10.23 | 10.75 | 10.45 | 1.13                  |
| 8               | 239845_at      | AI885066       | ---                                  | 0.000001 | 6.10 | 5.92 | 5.94 | 6.16 | 5.99 | 6.18 | 6.01 | 6.07 | 6.20 | 6.45 | 6.30 | 6.36 | 7.07 | 7.24 | 7.04 | 8.10  | 8.31  | 8.07  | 0.88                  |
| 8               | 204180_s_at    | AI745225       | ZNF297B                              | 0.000080 | 7.48 | 7.61 | 7.42 | 7.87 | 7.49 | 7.76 | 7.71 | 7.71 | 7.79 | 8.02 | 7.81 | 7.89 | 8.74 | 8.80 | 8.59 | 9.59  | 9.95  | 9.51  | 1.10                  |
| 8               | 220277_at      | NM_025212      | CXXC4                                | 0.000140 | 7.23 | 7.20 | 7.20 | 7.25 | 7.37 | 7.39 | 7.27 | 7.41 | 7.29 | 7.30 | 7.20 | 7.28 | 7.76 | 8.01 | 7.86 | 8.38  | 8.51  | 8.69  | 0.88                  |
| 8               | 205786_s_at    | NM_000632      | ITGAM                                | 0.000026 | 5.77 | 5.88 | 6.14 | 6.03 | 6.19 | 6.03 | 6.05 | 6.13 | 6.20 | 6.06 | 6.26 | 5.95 | 7.07 | 7.13 | 7.08 | 8.00  | 8.16  | 8.41  | 0.86                  |
| 8               | 229523_at      | N66694         | TTMA                                 | 0.000328 | 5.97 | 5.90 | 6.00 | 6.03 | 6.23 | 6.13 | 6.25 | 6.10 | 6.09 | 6.33 | 6.34 | 6.02 | 7.50 | 7.52 | 7.37 | 8.37  | 8.30  | 9.10  | 1.03                  |
| 8               | 226218_at      | BE217880       | IL7R                                 | 0.000007 | 6.24 | 6.08 | 6.19 | 6.27 | 6.20 | 6.13 | 6.37 | 6.32 | 6.11 | 6.35 | 6.37 | 6.22 | 7.62 | 7.52 | 7.45 | 8.56  | 8.83  | 9.18  | 0.75                  |
| 8               | 233002_at      | AB046842       | KIAA1622                             | 0.000007 | 4.17 | 4.19 | 4.10 | 4.27 | 4.17 | 4.14 | 4.23 | 4.28 | 4.25 | 4.38 | 4.29 | 4.37 | 5.82 | 6.25 | 5.98 | 7.48  | 7.63  | 8.34  | 0.71                  |
| 8               | 220445_s_at    | NM_004909      | CSAG2                                | 0.004950 | 6.70 | 6.44 | 6.68 | 6.66 | 6.85 | 6.53 | 6.81 | 6.77 | 6.57 | 6.91 | 7.00 | 6.83 | 7.68 | 8.06 | 7.76 | 8.44  | 8.77  | 9.31  | 1.10                  |
| 8               | 219667_s_at    | NM_017935      | BANK1                                | 0.048189 | 6.15 | 5.87 | 5.82 | 6.05 | 6.14 | 6.17 | 6.15 | 5.91 | 6.12 | 6.23 | 6.33 | 6.16 | 6.61 | 7.03 | 6.88 | 7.67  | 7.82  | 8.60  | 1.03                  |
| 8               | 60084_at       | AI453099       | CYLD                                 | 0.027105 | 5.01 | 5.02 | 5.08 | 5.10 | 5.15 | 5.03 | 5.04 | 5.15 | 5.11 | 5.24 | 5.22 | 5.11 | 5.62 | 5.61 | 5.65 | 6.09  | 6.10  | 6.67  | 1.03                  |
| 8               | 206785_s_at    | NM_002260      | KLRC1 /// KLRC2                      | 0.005252 | 5.01 | 5.02 | 5.02 | 5.07 | 5.00 | 5.08 | 5.21 | 5.25 | 5.31 | 5.19 | 5.02 | 5.01 | 5.91 | 5.91 | 6.21 | 7.03  | 7.32  | 8.11  | 0.86                  |
| 8               | 223784_at      | AF229179       | TMEM27                               | 0.003674 | 4.69 | 4.67 | 4.55 | 4.55 | 4.67 | 4.71 | 4.78 | 4.80 | 4.91 | 5.13 | 4.80 | 4.83 | 5.61 | 5.78 | 5.87 | 6.78  | 7.33  | 7.93  | 0.79                  |
| 8               | 1564807_at     | BC020888       | MPPED1                               | 0.020233 | 4.42 | 4.39 | 4.35 | 4.35 | 4.30 | 4.34 | 4.45 | 4.47 | 4.48 | 4.46 | 4.43 | 4.40 | 5.07 | 5.28 | 5.43 | 5.68  | 6.22  | 6.63  | 1.00                  |
| 8               | 210587_at      | BC005161       | INHBE                                | 0.033201 | 5.59 | 5.35 | 5.30 | 5.35 | 5.37 | 5.56 | 5.09 | 5.26 | 5.15 | 5.49 | 5.62 | 5.31 | 6.27 | 6.25 | 6.55 | 6.82  | 7.33  | 7.86  | 1.12                  |
| 8               | 216840_s_at    | AK026829       | LAMA2                                | 0.026763 | 5.80 | 5.86 | 5.84 | 5.65 | 5.81 | 5.89 | 5.74 | 5.86 | 5.79 | 5.87 | 5.93 | 5.93 | 6.57 | 6.56 | 6.37 | 6.83  | 7.51  | 7.51  | 0.98                  |
| 8               | 213415_at      | AI768628       | CLIC2                                | 0.002714 | 5.10 | 4.99 | 5.05 | 4.84 | 4.96 | 5.06 | 4.98 | 4.91 | 5.00 | 5.20 | 5.16 | 5.09 | 5.46 | 5.48 | 5.47 | 5.99  | 6.48  | 6.41  | 0.80                  |
| 8               | 236508_at      | AW341794       | ---                                  | 0.000874 | 7.07 | 6.75 | 6.92 | 7.00 | 7.02 | 7.14 | 7.12 | 7.09 | 7.07 | 6.92 | 7.06 | 6.83 | 7.70 | 7.56 | 7.53 | 8.19  | 8.53  | 8.55  | 0.98                  |
| 8               | 222314_x_at    | AW970881       | ---                                  | 0.001665 | 6.21 | 5.78 | 5.93 | 6.00 | 6.13 | 6.26 | 6.10 | 6.17 | 5.97 | 6.20 | 6.06 | 6.06 | 6.83 | 6.70 | 6.64 | 7.57  | 8.01  | 8.09  | 0.82                  |
| 8               | 205625_s_at    | AW014927       | CALB1                                | 0.000226 | 5.08 | 5.00 | 4.94 | 5.01 | 5.05 | 5.11 | 4.98 | 5.02 | 5.04 | 5.00 | 5.03 | 5.03 | 5.42 | 5.54 | 5.44 | 5.93  | 6.27  | 6.15  | 0.69                  |
| 8               | 238383_at      | AI857688       | LOC389429                            | 0.000088 | 6.80 | 6.52 | 6.70 | 6.71 | 6.78 | 6.73 | 6.67 | 6.72 | 6.53 | 6.70 | 6.80 | 6.75 | 7.41 | 7.33 | 7.51 | 8.13  | 8.45  | 8.54  | 0.70</                |

| K-Mean<br>Order | Probe<br>Names | Gene<br>GBiD<br>Symbol | Adj. p-Value<br>≤0.05, |      |      |      |      |      |      |      |      |       |      |      |      |       |       |       |       |       |       | K-Means<br>Similarity |
|-----------------|----------------|------------------------|------------------------|------|------|------|------|------|------|------|------|-------|------|------|------|-------|-------|-------|-------|-------|-------|-----------------------|
|                 |                |                        | Bonferroni             | c1   | c2   | c3   | 6h1  | 6h2  | 6h3  | 12h1 | 12h2 | 12h3  | 24h1 | 24h2 | 24h3 | 48h1  | 48h2  | 48h3  | 72h1  | 72h2  | 72h3  |                       |
| 8               | 214814_at      | BF592058               | 0.000025               | 5.02 | 5.20 | 5.17 | 4.75 | 4.67 | 4.97 | 4.94 | 4.95 | 5.20  | 5.10 | 5.32 | 5.23 | 5.72  | 5.85  | 5.75  | 6.73  | 6.66  | 6.78  | 0.92                  |
| 8               | 218611_at      | NM_016545              | 0.002392               | 9.45 | 9.69 | 9.73 | 9.34 | 9.08 | 9.55 | 9.39 | 9.48 | 10.02 | 9.77 | 9.84 | 9.80 | 10.40 | 10.38 | 10.57 | 11.49 | 11.57 | 11.41 | 1.12                  |
| 8               | 228245_s_at    | AW594320               | 0.000358               | 7.24 | 7.46 | 7.27 | 7.03 | 6.47 | 7.00 | 6.95 | 7.08 | 7.37  | 7.11 | 6.67 | 7.55 | 8.17  | 8.45  | 8.16  | 10.19 | 10.64 | 10.70 | 0.74                  |
| 8               | 222128_at      | U080764                | 0.000349               | 6.93 | 6.99 | 6.64 | 6.67 | 6.60 | 7.11 | 6.81 | 6.70 | 7.49  | 6.67 | 6.79 | 7.10 | 8.15  | 8.58  | 9.23  | 10.91 | 11.21 | 11.57 | 0.71                  |
| 8               | 235949_at      | BF664545               | 0.000000               | 4.96 | 5.18 | 5.14 | 5.16 | 4.77 | 5.27 | 4.99 | 4.94 | 5.27  | 5.03 | 5.10 | 5.14 | 6.56  | 6.73  | 6.81  | 8.60  | 8.65  | 8.95  | 0.53                  |
| 8               | 202683_s_at    | NM_003799              | 0.000491               | 8.34 | 8.34 | 8.33 | 8.35 | 8.23 | 8.52 | 8.19 | 8.36 | 8.50  | 8.43 | 8.44 | 8.58 | 9.00  | 9.23  | 8.93  | 9.78  | 9.97  | 10.11 | 0.71                  |
| 8               | 218987_at      | NM_018179              | 0.002572               | 6.80 | 7.09 | 6.78 | 6.92 | 6.60 | 7.00 | 6.62 | 7.02 | 6.76  | 7.06 | 6.78 | 6.99 | 7.45  | 7.77  | 7.58  | 8.84  | 8.61  | 9.06  | 0.81                  |
| 8               | 223387_at      | AB046809               | 0.000354               | 8.12 | 8.38 | 8.20 | 8.31 | 8.34 | 8.28 | 8.19 | 8.23 | 8.22  | 8.19 | 8.18 | 8.35 | 8.67  | 8.71  | 8.68  | 9.10  | 9.19  | 9.29  | 0.89                  |
| 8               | 211126_s_at    | U46006                 | 0.000749               | 7.98 | 8.15 | 8.13 | 7.98 | 7.91 | 8.07 | 7.93 | 8.01 | 8.05  | 8.06 | 7.94 | 8.28 | 8.61  | 8.74  | 8.59  | 9.06  | 9.21  | 9.22  | 1.01                  |
| 8               | 226747_at      | AB037765               | 0.008727               | 5.66 | 5.77 | 5.79 | 5.57 | 5.63 | 5.66 | 5.66 | 5.74 | 6.01  | 5.72 | 5.49 | 5.70 | 6.39  | 6.46  | 6.50  | 7.10  | 7.00  | 7.63  | 1.06                  |
| 8               | 216034_at      | AA558468               | 0.011314               | 7.48 | 7.61 | 7.49 | 7.33 | 7.43 | 7.49 | 7.57 | 7.51 | 7.59  | 7.61 | 7.42 | 7.46 | 7.81  | 7.95  | 7.81  | 8.19  | 8.27  | 8.46  | 1.03                  |
| 8               | 212136_at      | AW517686               | 0.003615               | 8.51 | 8.69 | 8.46 | 8.03 | 7.93 | 8.46 | 8.69 | 8.38 | 8.68  | 8.38 | 8.14 | 8.18 | 9.05  | 9.17  | 9.14  | 9.87  | 9.94  | 10.17 | 1.34                  |
| 8               | 212457_at      | AL161985               | 0.003374               | 9.53 | 9.83 | 9.74 | 9.83 | 9.49 | 9.66 | 9.38 | 9.27 | 9.63  | 9.72 | 9.72 | 9.85 | 10.20 | 10.17 | 10.34 | 11.02 | 11.05 | 11.36 | 1.00                  |
| 8               | 238810_at      | H97074                 | 0.001136               | 4.28 | 4.32 | 4.29 | 4.45 | 4.38 | 4.34 | 4.23 | 4.28 | 4.41  | 4.42 | 4.47 | 4.48 | 4.65  | 4.60  | 4.81  | 5.32  | 5.23  | 5.52  | 0.91                  |
| 8               | 203459_s_at    | NM_022575              | 0.009298               | 8.62 | 8.85 | 8.79 | 8.84 | 8.89 | 8.45 | 8.83 | 8.81 | 8.68  | 8.84 | 8.95 | 9.07 | 9.21  | 9.33  | 9.32  | 10.03 | 10.07 | 10.35 | 1.07                  |
| 8               | 207247_s_at    | NM_003411              | 0.048539               | 4.58 | 4.46 | 4.53 | 4.48 | 4.38 | 4.36 | 4.47 | 4.43 | 4.50  | 4.52 | 4.55 | 4.79 | 4.88  | 4.92  | 4.79  | 5.39  | 5.13  | 5.50  | 1.29                  |
| 8               | 209913_x_at    | AB007875               | 0.000069               | 7.08 | 7.41 | 7.47 | 7.34 | 7.19 | 7.31 | 7.34 | 7.20 | 7.22  | 7.35 | 7.39 | 7.50 | 7.80  | 7.83  | 7.74  | 8.97  | 8.81  | 8.87  | 0.78                  |
| 8               | 239177_at      | AI732104               | 0.033107               | 6.01 | 6.29 | 6.33 | 6.02 | 6.29 | 6.24 | 6.26 | 6.09 | 6.25  | 6.37 | 6.32 | 6.40 | 6.43  | 6.61  | 6.59  | 7.33  | 7.24  | 7.10  | 1.26                  |
| 8               | 232979_at      | AK000839               | 0.001194               | 6.75 | 6.99 | 7.08 | 6.78 | 6.86 | 6.81 | 7.03 | 6.91 | 7.07  | 7.03 | 7.06 | 7.32 | 7.61  | 7.64  | 7.51  | 8.47  | 8.40  | 8.14  | 1.19                  |
| 8               | 210162_s_at    | U08015                 | 0.046297               | 7.03 | 7.22 | 7.20 | 7.17 | 7.06 | 6.97 | 7.11 | 7.08 | 6.87  | 7.12 | 7.09 | 7.18 | 7.38  | 7.51  | 7.32  | 7.82  | 7.94  | 7.79  | 1.27                  |
| 8               | 219484_at      | NM_013320              | 0.040210               | 6.29 | 6.21 | 6.21 | 6.15 | 6.36 | 6.50 | 6.26 | 6.33 | 6.44  | 6.66 | 6.55 | 6.58 | 6.54  | 6.51  | 7.04  | 7.57  | 7.66  | 7.89  | 1.33                  |
| 8               | 212916_at      | AW249934               | 0.006518               | 7.81 | 8.09 | 7.93 | 8.00 | 8.21 | 8.10 | 8.04 | 8.18 | 8.27  | 8.34 | 8.32 | 8.23 | 8.44  | 8.42  | 8.68  | 9.23  | 9.17  | 9.45  | 1.27                  |
| 8               | 221530_s_at    | BE857425               | 0.029168               | 4.81 | 4.64 | 4.69 | 4.69 | 4.91 | 4.83 | 4.86 | 4.78 | 4.93  | 5.01 | 4.92 | 4.88 | 5.23  | 5.04  | 5.37  | 5.89  | 5.72  | 6.15  | 1.18                  |
| 8               | 226271_at      | N46350                 | 0.026233               | 7.78 | 7.73 | 7.78 | 7.74 | 7.75 | 7.92 | 7.65 | 7.71 | 7.90  | 7.84 | 7.87 | 7.98 | 7.96  | 8.04  | 8.26  | 8.91  | 8.84  | 8.84  | 1.15                  |
| 8               | 1555938_x_at   | AI520969               | 0.000048               | 4.91 | 4.89 | 4.85 | 4.86 | 4.87 | 5.15 | 4.85 | 4.88 | 5.05  | 5.19 | 5.17 | 5.10 | 5.38  | 5.38  | 5.51  | 6.57  | 6.88  | 6.39  | 0.90                  |
| 8               | 232230_at      | AU151788               | 0.019146               | 5.68 | 5.71 | 5.74 | 5.52 | 5.66 | 5.71 | 5.46 | 5.36 | 5.58  | 5.58 | 5.64 | 5.66 | 5.72  | 5.82  | 5.79  | 6.49  | 6.70  | 6.32  | 1.45                  |
| 8               | 238695_s_at    | AW960289               | 0.003851               | 5.01 | 4.85 | 4.85 | 4.92 | 4.83 | 5.01 | 4.74 | 4.66 | 4.56  | 4.67 | 4.82 | 4.82 | 5.37  | 5.03  | 5.12  | 6.73  | 6.69  | 6.14  | 1.33                  |
| 8               | 242778_at      | AA250935               | 0.021824               | 6.25 | 6.20 | 6.26 | 6.12 | 6.06 | 6.20 | 6.16 | 6.12 | 6.16  | 6.31 | 6.30 | 6.24 | 6.42  | 6.34  | 6.41  | 7.77  | 7.91  | 7.18  | 1.49                  |
| 8               | 1566204_at     | AL589610               | 0.005580               | 5.61 | 5.55 | 5.53 | 5.53 | 5.76 | 5.66 | 5.59 | 5.66 | 5.67  | 5.77 | 5.68 | 5.85 | 5.97  | 6.00  | 5.99  | 6.94  | 7.12  | 6.60  | 1.20                  |
| 8               | 204388_s_at    | NM_000240              | 0.009973               | 5.12 | 4.94 | 5.02 | 5.08 | 4.97 | 5.06 | 5.04 | 5.06 | 5.19  | 5.01 | 4.87 | 5.07 | 5.13  | 5.08  | 5.20  | 5.68  | 5.78  | 5.80  | 1.42                  |
| 8               | 229221_at      | BE467023               | 0.001181               | 6.34 | 6.48 | 6.30 | 6.33 | 6.30 | 6.50 | 6.51 | 6.48 | 6.79  | 6.07 | 6.21 | 6.21 | 6.66  | 6.80  | 6.63  | 7.70  | 8.17  | 7.96  | 1.35                  |
| 8               | 1562677_at     | BC002966               | 0.000239               | 4.20 | 4.26 | 4.25 | 4.13 | 4.14 | 4.21 | 4.12 | 4.11 | 4.17  | 4.17 | 4.14 | 4.16 | 4.27  | 4.24  | 4.37  | 4.68  | 4.66  | 4.68  | 1.01                  |
| 8               | 226758_at      | AA043552               | 0.033518               | 9.06 | 9.13 | 9.17 | 8.89 | 8.81 | 9.05 | 8.91 | 8.91 | 9.13  | 9.11 | 9.06 | 9.13 | 9.18  | 9.24  | 9.36  | 9.71  | 9.80  | 9.91  | 1.21                  |
| 8               | 212384_at      | AI282485               | 0.030410               | 6.99 | 7.13 | 6.94 | 7.12 | 6.60 | 6.95 | 6.96 | 6.81 | 7.03  | 7.05 | 7.01 | 6.88 | 7.32  | 7.23  | 7.30  | 8.22  | 8.21  | 8.00  | 1.18                  |
| 8               | 238609_at      | T53175                 | 0.000032               | 5.32 | 5.31 | 5.41 | 5.17 | 4.98 | 5.17 | 5.33 | 5.23 | 5.40  | 5.35 | 5.32 | 5.25 | 5.54  | 5.49  | 5.53  | 6.30  | 6.29  | 6.37  | 1.04                  |
| 8               | 235607_at      | BF970044               | 0.000034               | 4.71 | 4.62 | 4.61 | 4.61 | 4.44 | 4.63 | 4.62 | 4.61 | 4.62  | 4.56 | 4.64 | 4.61 | 4.86  | 4.69  | 4.75  | 5.57  | 5.69  | 5.67  | 1.02                  |
| 8               | 236645_at      | AI689935               | 0.005498               | 5.62 | 5.55 | 5.53 | 5.67 | 5.52 | 5.60 | 5.69 | 5.54 | 5.52  | 5.62 | 5.73 | 5.57 | 5.74  | 5.69  | 5.65  | 6.26  | 6.25  | 6.38  | 1.29                  |
| 8               | 203171_s_at    | NM_015324              | 0.001316               | 8.04 | 8.22 | 8.04 | 8.21 | 8.28 | 8.19 | 8.06 | 8.19 | 8.04  | 8.26 | 8.22 | 8.22 | 8.30  | 8.28  | 8.31  | 8.80  | 8.91  | 8.94  | 1.32                  |
| 8               | 207517_at      | NM_018891              | 0.014452               | 6.79 | 6.61 | 6.78 | 6.71 | 6.83 | 6.80 | 6.72 | 6.73 | 6.63  | 6.84 | 6.72 | 6.69 | 6.87  | 6.80  | 6.86  | 7.31  | 7.42  | 7.46  | 1.32                  |
| 8               | 1556253_s_at   | AW452656               | 0.000460               | 5.41 | 5.38 | 5.41 | 5.26 | 5.32 | 5.48 | 5.29 | 5.35 | 5.25  | 5.52 | 5.44 | 5.36 | 5.45  | 5.51  | 5.55  | 6.15  | 6.30  | 6.25  | 1.13                  |
| 8               | 214169_at      | BE615699               | 0.008749               | 5.68 | 5.59 | 5.64 | 5.70 | 5.64 | 5.69 | 5.71 | 5.55 | 5.42  | 5.72 | 5.34 | 5.68 | 5.69  | 6.13  | 6.07  | 6.96  | 7.24  | 7.34  | 1.05                  |
| 8               | 207584_at      | NM_005577              | 0.016083               | 5.15 | 5.15 | 5.10 | 5.09 | 5.11 | 5.09 | 5.11 | 5.15 | 5.04  | 5.19 | 5.19 | 5.06 | 5.18  | 5.10  | 5.23  | 6.19  | 6.49  | 6.93  | 1.51                  |
| 8               | 228640_at      | BE644809               | 0.012156               | 4.35 | 4.32 | 4.36 | 4.36 | 4.29 | 4.44 | 4.45 | 4.42 | 4.37  | 4.38 | 4.43 | 4.34 | 4.46  | 4.48  | 4.37  | 5.17  | 5.47  | 5.70  | 1.46                  |
| 8               | 225763_at      | AI659418               | 0.000026               | 5.61 | 5.59 | 5.58 | 5.52 | 5.61 | 5.56 | 5.52 | 5.61 | 5.45  | 5.60 | 5.60 | 5.72 | 5.73  | 5.82  | 5.93  | 7.34  | 7.82  | 7.86  | 1.07                  |
| 8               | 220817_at      | NM_016179              | 0.016200               | 4.33 | 4.23 | 4.37 | 4.26 | 4.26 | 4.35 | 4.25 | 4.18 | 4.24  | 4.31 | 4.30 | 4.22 | 4.40  | 4.49  | 4.60  | 5.53  | 5.88  | 6.38  | 1.19                  |
| 8               | 232010_at      | AA129444               | 0.002061               | 4.42 | 4.45 | 4.45 | 4.41 | 4.46 | 4.37 | 4.50 | 4.44 | 4.40  | 4.45 | 4.38 | 4.39 | 4.57  | 4.64  | 4.72  | 5.49  | 5.88  | 6.06  | 1.07                  |
| 8               | 232164_s_at    | AL137725               | 0.021175               | 4.78 | 4.66 | 4.80 | 4.80 | 4.66 | 4.81 | 4.61 | 4.67 | 4.74  | 4.62 | 4.55 | 4.70 | 4.88  | 4.90  | 5.03  | 6.08  | 6.93  | 7.04  | 1.30                  |
| 8               | 238315_s_at    | BF061829               | 0.010396               | 6.02 | 6.12 | 5.97 | 5.99 | 5.92 | 6.23 | 6.02 | 6.08 | 6.20  | 6.25 | 5.76 | 5.92 | 6.38  | 6.31  | 6.54  | 7.89  | 7.96  | 8.69  | 1.12                  |
| 8               | 1560019_at     | BI869014               | 0.007739               | 6.43 | 6.44 | 6.37 | 6.57 | 6.45 | 6.55 | 6.35 | 6.21 | 6.25  | 6.27 | 6.26 | 6.02 | 6.67  | 6.81  | 6.89  | 7.80  | 7.85  | 8.50  | 1.15                  |
| 8               | 243404_at      | AA553477               | 0.009206               | 6.26 | 6.27 | 6.26 | 6.47 | 6.33 | 6.29 | 6.21 | 6.11 | 6.22  | 6.28 | 6.25 | 6.20 | 6.67  | 6.64  | 6.66  | 8.03  | 7.99  | 8.91  | 1.09                  |
| 8               | 242893_at      | AW195492               | 0.000344               | 4.67 | 4.50 | 4.53 | 4.54 | 4.59 | 4.61 | 4.58 | 4.49 | 4.44  | 4.54 | 4.54 | 4.52 | 5.33  | 5.27  | 5.38  | 6.91  | 7.47  | 8.01  | 0.68                  |
| 8               | 1564430_at     | BC007549               | 0.000049               | 6.26 | 6.18 | 6.09 | 5.99 | 6.17 | 6.18 | 6.22 | 6.27 | 6.22  | 6.27 | 6.29 | 6.18 | 6.83  | 6.97  | 7.07  | 8.26  | 8.85  | 8.92  | 0.55                  |
| 8               | 239203_at      | AW014728               | 0.016423               | 7.05 | 7.01 | 7.12 | 6.99 | 7.07 | 7.15 | 7.15 | 7.08 | 7.07  | 7.16 | 6.99 | 7.11 | 7.30  | 7.43  | 7.56  | 8.10  | 8.09  | 8.54  | 0.91                  |
| 8               | 209955_s_at    | U76833                 | 0.001540               | 5.59 | 5.41 | 5.46 | 5.48 | 5.75 | 5.58 | 5.62 | 5.58 | 5.38  | 5.62 | 5.72 | 5.51 | 6.16  | 6.21  | 6.26  | 7.75  | 7.51  | 8.39  |                       |

| K-Mean<br>Order | Probe<br>Names | Gene<br>Symbol | Adj. p-Value<br>≤0.05,<br>Bonferroni | K-Means<br>Similarity |       |       |       |       |       |       |       |       |       |       |       |       |       |       |       |       |       |      |
|-----------------|----------------|----------------|--------------------------------------|-----------------------|-------|-------|-------|-------|-------|-------|-------|-------|-------|-------|-------|-------|-------|-------|-------|-------|-------|------|
|                 |                |                |                                      | c1                    | c2    | c3    | 6h1   | 6h2   | 6h3   | 12h1  | 12h2  | 12h3  | 24h1  | 24h2  | 24h3  | 48h1  | 48h2  | 48h3  | 72h1  | 72h2  | 72h3  |      |
| 8               | 224650_at      | AL117612       | MAL2                                 | 0.011283              | 4.52  | 4.47  | 4.39  | 4.63  | 4.58  | 4.65  | 4.46  | 4.44  | 4.59  | 4.62  | 4.60  | 5.09  | 4.84  | 4.88  | 5.50  | 5.22  | 5.60  | 1.27 |
| 8               | 226065_at      | N98595         | PRICKLE1                             | 0.001982              | 8.64  | 8.85  | 8.54  | 7.82  | 7.59  | 7.94  | 8.26  | 8.40  | 8.58  | 8.61  | 8.56  | 8.50  | 8.88  | 8.81  | 9.10  | 9.52  | 9.71  | 2.14 |
| 8               | 203958_s_at    | A1557467       | ZBTB40                               | 0.000491              | 7.28  | 7.46  | 7.33  | 6.97  | 6.98  | 7.06  | 7.42  | 7.29  | 7.21  | 7.46  | 7.18  | 7.20  | 7.57  | 7.57  | 7.54  | 8.30  | 8.23  | 1.32 |
| 8               | 227067_x_at    | AW024960       | NOTCH2NL                             | 0.002487              | 8.27  | 8.75  | 8.51  | 7.92  | 8.00  | 7.69  | 8.25  | 8.45  | 8.30  | 8.58  | 8.54  | 8.59  | 8.59  | 8.78  | 8.74  | 9.60  | 9.73  | 1.72 |
| 8               | 203026_at      | NM_014872      | ZBTB5                                | 0.032101              | 8.75  | 8.96  | 9.04  | 8.82  | 8.85  | 8.65  | 9.05  | 9.05  | 9.03  | 9.20  | 9.18  | 9.32  | 9.31  | 9.40  | 9.19  | 9.70  | 9.88  | 1.79 |
| 8               | 1555259_at     | AF465843       | ZAK                                  | 0.035090              | 7.29  | 7.49  | 7.41  | 7.34  | 7.49  | 7.48  | 6.77  | 6.97  | 7.13  | 6.68  | 6.95  | 6.74  | 7.32  | 7.41  | 7.51  | 7.85  | 7.95  | 2.85 |
| 8               | 217523_at      | AV700298       | CD44                                 | 0.044952              | 7.03  | 7.77  | 7.55  | 8.15  | 7.59  | 8.30  | 7.30  | 7.15  | 7.81  | 6.90  | 6.89  | 7.23  | 8.15  | 8.37  | 8.21  | 9.64  | 9.47  | 1.81 |
| 8               | 210355_at      | J03580         | PTHLH                                | 0.010043              | 4.80  | 4.59  | 4.67  | 4.90  | 4.97  | 5.17  | 4.52  | 4.61  | 4.84  | 4.59  | 4.55  | 4.56  | 4.87  | 4.98  | 5.03  | 5.71  | 5.64  | 1.94 |
| 8               | 235709_at      | H37811         | GAS2L3                               | 0.002447              | 8.78  | 8.79  | 8.78  | 7.94  | 7.65  | 8.21  | 7.70  | 7.51  | 7.91  | 7.92  | 7.71  | 7.84  | 8.68  | 8.52  | 8.61  | 9.75  | 9.75  | 2.24 |
| 8               | 238756_at      | AI860012       | ---                                  | 0.003361              | 8.44  | 8.51  | 8.68  | 6.83  | 6.19  | 7.25  | 6.00  | 6.00  | 6.78  | 6.72  | 6.56  | 6.95  | 8.11  | 8.03  | 8.50  | 9.65  | 9.71  | 2.43 |
| 8               | 225242_s_at    | AW303375       | URB                                  | 0.048679              | 8.91  | 9.38  | 9.31  | 8.63  | 8.32  | 8.66  | 7.97  | 8.18  | 8.56  | 8.40  | 8.38  | 8.47  | 8.85  | 8.81  | 8.96  | 9.80  | 9.97  | 2.45 |
| 8               | 208763_s_at    | AL110191       | TSC22D3                              | 0.010225              | 8.93  | 9.01  | 8.92  | 7.87  | 7.64  | 7.53  | 8.18  | 7.79  | 8.34  | 8.57  | 8.60  | 8.57  | 8.55  | 8.54  | 8.60  | 9.63  | 9.47  | 2.87 |
| 8               | 202814_s_at    | AW193511       | HEXIM1                               | 0.010723              | 9.43  | 9.66  | 9.60  | 8.77  | 8.66  | 8.66  | 9.19  | 9.07  | 9.21  | 9.21  | 9.07  | 9.20  | 9.10  | 8.99  | 9.03  | 9.84  | 9.62  | 3.86 |
| 8               | 212741_at      | AA923354       | MAOA                                 | 0.000175              | 7.35  | 7.45  | 7.41  | 7.29  | 7.23  | 7.13  | 7.22  | 7.17  | 7.13  | 6.99  | 6.81  | 7.14  | 7.06  | 7.02  | 6.80  | 8.38  | 8.51  | 2.41 |
| 8               | 243905_at      | AI652676       | LOC387895                            | 0.000805              | 5.76  | 5.65  | 5.67  | 5.66  | 5.73  | 5.67  | 5.73  | 5.58  | 5.63  | 5.73  | 5.85  | 5.78  | 5.53  | 5.64  | 5.64  | 6.43  | 6.31  | 2.18 |
| 9               | 207574_s_at    | NM_015675      | GADD45B                              | 0.000338              | 7.70  | 7.73  | 7.71  | 7.31  | 7.33  | 6.77  | 8.33  | 8.32  | 8.13  | 8.66  | 8.57  | 8.65  | 8.46  | 8.37  | 8.51  | 9.52  | 9.77  | 2.24 |
| 9               | 229784_at      | AA234096       | MGC16121                             | 0.015782              | 7.90  | 7.99  | 8.00  | 7.60  | 7.75  | 7.58  | 8.09  | 8.11  | 7.92  | 8.23  | 8.17  | 8.18  | 8.05  | 8.08  | 8.05  | 8.50  | 8.48  | 2.77 |
| 9               | 228742_at      | AA745978       | ---                                  | 0.002442              | 7.86  | 7.81  | 7.66  | 7.55  | 7.58  | 7.40  | 8.06  | 8.07  | 8.05  | 8.27  | 8.30  | 8.30  | 8.29  | 8.28  | 8.12  | 8.59  | 8.53  | 1.92 |
| 9               | 218248_at      | NM_022074      | FLJ22794                             | 0.000086              | 8.71  | 8.77  | 8.71  | 7.94  | 8.13  | 7.93  | 9.09  | 9.01  | 9.13  | 9.42  | 9.39  | 9.68  | 9.50  | 9.53  | 9.62  | 9.50  | 9.61  | 1.58 |
| 9               | 225344_at      | AL035689       | NCOA7                                | 0.000000              | 10.81 | 10.78 | 10.87 | 9.78  | 9.97  | 10.06 | 12.38 | 12.35 | 12.70 | 12.61 | 12.80 | 12.74 | 13.05 | 12.99 | 13.26 | 12.86 | 13.04 | 1.14 |
| 9               | 212067_s_at    | AL573058       | C1R                                  | 0.004465              | 8.72  | 9.19  | 9.12  | 8.45  | 8.06  | 7.91  | 9.30  | 9.25  | 9.18  | 9.84  | 9.89  | 9.98  | 10.09 | 9.97  | 10.43 | 9.84  | 9.91  | 1.73 |
| 9               | 205104_at      | NM_014723      | SNPH                                 | 0.011704              | 8.05  | 8.36  | 8.20  | 7.71  | 8.16  | 8.13  | 8.61  | 8.70  | 8.55  | 9.35  | 9.40  | 9.52  | 9.52  | 9.45  | 9.43  | 9.31  | 9.64  | 1.26 |
| 9               | 219759_at      | NM_022350      | LRAP                                 | 0.014992              | 5.91  | 5.72  | 5.96  | 5.71  | 5.64  | 5.93  | 6.49  | 6.55  | 6.05  | 7.18  | 7.05  | 7.06  | 7.15  | 6.87  | 7.12  | 7.12  | 7.17  | 1.25 |
| 9               | 200868_s_at    | NM_018683      | ZNF313                               | 0.008905              | 7.95  | 8.43  | 8.67  | 8.16  | 8.26  | 8.09  | 8.76  | 8.76  | 8.75  | 9.85  | 9.70  | 10.04 | 9.53  | 9.56  | 9.55  | 9.80  | 9.75  | 1.55 |
| 9               | 216231_s_at    | AW188940       | B2M                                  | 0.047625              | 10.83 | 11.59 | 11.63 | 10.85 | 11.21 | 10.90 | 12.12 | 11.86 | 11.84 | 12.57 | 12.53 | 12.98 | 12.99 | 12.81 | 12.62 | 13.11 | 13.10 | 1.39 |
| 9               | 33304_at       | U88964         | ISG20                                | 0.000000              | 7.67  | 7.47  | 7.59  | 8.11  | 8.19  | 7.76  | 9.79  | 9.60  | 8.92  | 11.39 | 11.51 | 11.47 | 12.23 | 12.26 | 12.23 | 12.61 | 12.71 | 1.03 |
| 9               | 204698_at      | NM_002201      | ISG20                                | 0.000002              | 7.24  | 7.38  | 7.31  | 7.95  | 7.96  | 7.37  | 9.86  | 9.64  | 8.65  | 11.63 | 11.72 | 11.78 | 12.46 | 12.50 | 12.39 | 12.81 | 12.90 | 1.01 |
| 9               | 1555759_a_at   | AF043341       | CCL5                                 | 0.000011              | 8.20  | 8.01  | 8.17  | 8.06  | 8.23  | 8.12  | 10.40 | 10.56 | 8.90  | 12.75 | 12.99 | 12.96 | 14.21 | 14.08 | 13.67 | 14.24 | 14.24 | 1.14 |
| 9               | 202411_at      | NM_005532      | IFI27                                | 0.000093              | 5.58  | 5.53  | 5.31  | 5.32  | 5.37  | 5.50  | 8.07  | 7.75  | 6.68  | 9.77  | 9.70  | 10.14 | 10.77 | 10.85 | 10.21 | 10.88 | 11.14 | 0.96 |
| 9               | 209558_s_at    | AB013384       | HIPIR                                | 0.002340              | 7.59  | 7.50  | 7.41  | 7.49  | 7.79  | 7.39  | 9.01  | 9.30  | 8.48  | 10.73 | 10.74 | 10.66 | 11.63 | 11.83 | 10.71 | 11.91 | 11.68 | 1.21 |
| 9               | 38340_at       | AB014555       | HIPIR                                | 0.002711              | 9.21  | 9.12  | 9.15  | 9.01  | 9.12  | 8.85  | 10.27 | 10.55 | 9.66  | 11.88 | 12.09 | 12.05 | 12.80 | 12.88 | 12.03 | 13.15 | 12.92 | 1.33 |
| 9               | 221875_x_at    | AW514210       | HLA-F                                | 0.001364              | 8.78  | 9.00  | 9.13  | 8.51  | 8.60  | 8.57  | 9.89  | 9.80  | 9.26  | 10.45 | 10.57 | 10.53 | 11.12 | 11.04 | 10.60 | 11.40 | 11.43 | 1.32 |
| 9               | 204806_x_at    | NM_018950      | HLA-F                                | 0.008384              | 8.19  | 8.52  | 8.52  | 8.25  | 8.26  | 7.96  | 9.30  | 9.12  | 8.51  | 9.90  | 10.07 | 10.02 | 10.50 | 10.53 | 10.12 | 10.88 | 10.98 | 1.49 |
| 9               | 201473_at      | NM_002229      | JUNB                                 | 0.000308              | 8.23  | 8.53  | 8.45  | 7.85  | 7.95  | 7.79  | 8.94  | 9.10  | 8.47  | 10.04 | 10.05 | 10.14 | 10.39 | 10.37 | 10.01 | 11.23 | 10.78 | 1.57 |
| 9               | 204070_at      | NM_004585      | RARRES3                              | 0.000880              | 6.99  | 6.78  | 6.90  | 6.71  | 6.93  | 6.21  | 8.02  | 7.61  | 7.22  | 9.02  | 9.03  | 9.44  | 9.13  | 9.10  | 9.24  | 9.37  | 9.35  | 1.18 |
| 9               | 202081_at      | NM_004907      | IER2                                 | 0.004070              | 9.86  | 10.26 | 10.14 | 9.33  | 9.63  | 8.78  | 10.86 | 10.96 | 10.39 | 11.31 | 11.43 | 11.51 | 11.85 | 11.86 | 11.62 | 12.36 | 12.26 | 1.51 |
| 9               | 208812_x_at    | BC004489       | HLA-C                                | 0.000480              | 10.87 | 11.33 | 11.25 | 10.64 | 10.95 | 10.40 | 12.01 | 12.04 | 11.43 | 12.55 | 12.77 | 12.76 | 13.03 | 13.04 | 13.03 | 13.18 | 13.14 | 1.12 |
| 9               | 216526_x_at    | AK024836       | HLA-C                                | 0.000143              | 9.77  | 10.15 | 10.13 | 9.83  | 9.98  | 9.25  | 11.04 | 11.07 | 10.73 | 11.62 | 11.84 | 11.80 | 12.15 | 12.14 | 12.11 | 12.34 | 12.28 | 0.92 |
| 9               | 209140_x_at    | L42024         | HLA-B                                | 0.000986              | 9.53  | 9.99  | 9.93  | 9.63  | 9.80  | 8.88  | 11.04 | 10.99 | 10.21 | 11.87 | 12.10 | 12.22 | 12.56 | 12.61 | 12.44 | 13.17 | 13.04 | 1.27 |
| 9               | 214459_x_at    | M12679         | HLA-C                                | 0.041205              | 10.49 | 10.80 | 10.82 | 10.30 | 10.54 | 9.47  | 11.39 | 11.41 | 10.73 | 11.94 | 12.11 | 12.13 | 12.39 | 12.44 | 12.28 | 12.57 | 12.48 | 1.49 |
| 9               | 217456_x_at    | M31183         | HLA-E                                | 0.001390              | 9.02  | 9.02  | 8.99  | 8.78  | 8.75  | 8.33  | 9.99  | 9.79  | 9.25  | 10.42 | 10.51 | 10.32 | 10.48 | 10.51 | 10.37 | 10.84 | 10.83 | 1.24 |
| 9               | 202743_at      | BE622627       | PIK3R3                               | 0.000239              | 6.07  | 5.52  | 5.79  | 5.32  | 5.29  | 4.97  | 6.54  | 6.43  | 6.45  | 6.83  | 6.72  | 7.09  | 7.61  | 7.62  | 7.36  | 7.57  | 7.84  | 1.37 |
| 9               | 212501_at      | AL564683       | CEBPB                                | 0.000001              | 11.29 | 11.64 | 11.59 | 10.75 | 10.79 | 10.67 | 11.44 | 11.49 | 11.59 | 12.35 | 12.42 | 12.45 | 12.64 | 12.56 | 12.71 | 12.84 | 12.85 | 1.74 |
| 9               | 208174_x_at    | NM_005089      | U2AF1L2                              | 0.036916              | 8.07  | 8.09  | 7.98  | 7.93  | 7.99  | 7.70  | 8.26  | 8.19  | 8.22  | 8.37  | 8.51  | 8.59  | 8.54  | 8.53  | 8.64  | 8.62  | 8.64  | 1.45 |
| 9               | 209941_at      | U50062         | RIPK1                                | 0.015189              | 7.12  | 7.56  | 7.60  | 7.38  | 7.53  | 7.27  | 7.89  | 7.92  | 7.78  | 8.27  | 8.28  | 8.72  | 8.79  | 8.93  | 8.69  | 8.66  | 8.62  | 1.29 |
| 9               | 243514_at      | AI475902       | ---                                  | 0.009130              | 7.41  | 7.47  | 7.32  | 7.36  | 7.33  | 7.47  | 8.01  | 8.22  | 8.53  | 8.28  | 8.59  | 8.19  | 8.96  | 9.02  | 9.03  | 8.45  | 8.72  | 1.32 |
| 9               | 204702_s_at    | NM_004289      | NFE2L3                               | 0.003883              | 5.74  | 5.90  | 5.73  | 5.87  | 5.81  | 6.37  | 7.08  | 7.04  | 7.61  | 8.03  | 8.14  | 8.06  | 8.40  | 8.21  | 8.93  | 8.17  | 8.47  | 0.94 |
| 9               | 205027_s_at    | NM_005204      | MAP3K8                               | 0.002901              | 5.76  | 5.80  | 5.76  | 5.81  | 5.55  | 6.20  | 7.61  | 7.69  | 8.64  | 8.56  | 8.70  | 8.65  | 9.53  | 9.54  | 10.59 | 8.97  | 9.34  | 1.01 |
| 9               | 206115_at      | NM_004430      | EGR3                                 | 0.000224              | 5.39  | 5.52  | 5.60  | 5.32  | 5.42  | 5.44  | 6.79  | 7.01  | 7.52  | 7.24  | 7.29  | 7.45  | 8.40  | 8.14  | 8.75  | 7.85  | 8.24  | 1.05 |
| 9               | 220987_s_at    | NM_030952      | C11orf17 /// NUAQ2                   | 0.000445              | 9.43  | 9.56  | 9.39  | 9.15  | 9.07  | 9.49  | 10.04 | 10.35 | 10.68 | 11.07 | 11.11 | 11.12 | 11.29 | 11.29 | 11.65 | 11.47 | 11.62 | 1.00 |
| 9               | 224701_at      | AA056548       | PARP14                               | 0.000001              | 7.92  | 8.18  | 8.14  | 8.09  | 8.38  | 8.18  | 10.46 | 10.67 | 10.76 | 11.24 | 11.52 | 11.81 | 11.83 | 11.97 | 11.98 | 11.93 | 11.96 | 0.58 |
| 9               | 231577_s_at    | AW014593       | GBP1                                 | 0.000000              | 5.04  | 4.84  | 5.12  | 5.01  | 4.95  | 5.10  | 9.04  | 9.08  | 10.23 | 11.01 | 10.70 | 11.08 | 11.70 | 11.54 | 12.35 | 11.98 | 12.31 | 0.58 |
| 9               | 202270_at      | NM_002053      | GBP1                                 | 0.000000              | 4.04  | 4.22  | 4.14  | 4.08  | 4.08  | 4.13  | 8.20  | 8.23  | 9.11  | 10.24 | 10.24 | 10.18 | 10.87 | 10.86 | 11.34 | 11.14 | 11.24 | 0.45 |
| 9               | 242625_at      | AW18           |                                      |                       |       |       |       |       |       |       |       |       |       |       |       |       |       |       |       |       |       |      |

| K-Mean<br>Order | Probe<br>Names | Gene<br>Symbol | Adj. p-Value<br>≤0.05, |          |       |       |       |       |       |       |       |       |       |       |       |       |       |       |       |       | K-Means<br>Similarity |       |      |
|-----------------|----------------|----------------|------------------------|----------|-------|-------|-------|-------|-------|-------|-------|-------|-------|-------|-------|-------|-------|-------|-------|-------|-----------------------|-------|------|
|                 |                |                | Bonferroni             | c1       | c2    | c3    | 6h1   | 6h2   | 6h3   | 12h1  | 12h2  | 12h3  | 24h1  | 24h2  | 24h3  | 48h1  | 48h2  | 48h3  | 72h1  | 72h2  | 72h3                  |       |      |
| 9               | 209716_at      | M37435         | CSF1                   | 0.000088 | 9.17  | 9.24  | 9.14  | 9.38  | 9.28  | 9.08  | 10.33 | 10.26 | 10.16 | 10.44 | 10.60 | 10.61 | 11.39 | 11.29 | 11.07 | 11.13 | 11.17                 | 10.69 | 1.01 |
| 9               | 201368_at      | U07802         | ZFP36L2                | 0.004463 | 10.26 | 10.63 | 10.64 | 9.58  | 9.66  | 10.17 | 10.96 | 10.69 | 11.24 | 11.42 | 11.49 | 11.62 | 12.06 | 12.10 | 12.44 | 11.91 | 12.01                 | 12.30 | 1.50 |
| 9               | 225557_at      | AI091372       | AXUD1                  | 0.000004 | 7.83  | 8.25  | 8.20  | 7.91  | 7.69  | 7.48  | 9.27  | 9.39  | 9.43  | 9.92  | 9.97  | 9.99  | 10.70 | 10.58 | 10.67 | 11.19 | 11.35                 | 10.75 | 1.10 |
| 9               | 227697_at      | AI244908       | SOC33                  | 0.000044 | 6.58  | 6.52  | 6.48  | 6.00  | 5.78  | 6.35  | 8.45  | 8.36  | 9.17  | 8.25  | 8.18  | 8.24  | 9.04  | 9.00  | 9.47  | 9.64  | 9.79                  | 9.75  | 1.57 |
| 9               | 214866_at      | X74039         | PLAUR                  | 0.003618 | 7.40  | 7.58  | 7.44  | 7.49  | 7.63  | 7.70  | 8.00  | 7.93  | 7.96  | 8.21  | 8.23  | 8.18  | 8.39  | 8.44  | 8.68  | 8.17  | 8.36                  | 8.24  | 1.20 |
| 9               | 225443_at      | AK025344       | DCP1A                  | 0.004975 | 7.84  | 7.91  | 7.87  | 7.84  | 8.30  | 8.29  | 8.60  | 7.96  | 9.14  | 9.27  | 9.45  | 9.40  | 9.62  | 9.61  | 10.04 | 9.50  | 9.53                  | 9.45  | 1.04 |
| 9               | 210564_x_at    | AF009619       | CFLAR                  | 0.016310 | 8.30  | 8.41  | 8.50  | 8.54  | 8.40  | 8.67  | 9.01  | 8.84  | 9.07  | 9.29  | 9.34  | 9.21  | 9.57  | 9.39  | 9.72  | 9.52  | 9.42                  | 9.20  | 1.19 |
| 9               | 205841_at      | NM_004972      | JAK2                   | 0.000272 | 5.47  | 5.60  | 5.83  | 5.81  | 5.85  | 5.53  | 6.75  | 6.88  | 7.45  | 8.37  | 8.26  | 8.66  | 9.09  | 9.05  | 9.55  | 8.16  | 8.11                  | 8.90  | 1.01 |
| 9               | 216598_s_at    | S69738         | CCL2                   | 0.003155 | 7.93  | 8.07  | 8.10  | 7.99  | 7.83  | 7.83  | 8.77  | 8.73  | 8.87  | 9.50  | 9.32  | 9.96  | 10.10 | 9.96  | 10.69 | 9.69  | 9.80                  | 10.13 | 1.10 |
| 9               | 205842_s_at    | AF001362       | JAK2                   | 0.000008 | 6.74  | 7.00  | 7.28  | 6.83  | 6.77  | 6.99  | 8.27  | 7.91  | 8.36  | 9.47  | 9.29  | 9.63  | 10.25 | 10.12 | 10.39 | 9.74  | 9.47                  | 9.26  | 0.95 |
| 9               | 227935_s_at    | AA522681       | PCGF5                  | 0.000070 | 8.59  | 8.68  | 8.51  | 8.47  | 8.25  | 8.69  | 9.22  | 9.13  | 9.35  | 9.89  | 9.95  | 10.08 | 10.16 | 10.17 | 10.44 | 10.02 | 9.93                  | 10.07 | 0.85 |
| 9               | 204533_at      | NM_001565      | CXCL10                 | 0.000041 | 6.67  | 6.96  | 6.72  | 6.69  | 7.21  | 6.57  | 8.08  | 7.93  | 8.25  | 9.11  | 8.81  | 9.20  | 9.99  | 10.02 | 10.35 | 8.75  | 8.82                  | 9.12  | 1.24 |
| 9               | 220087_at      | NM_017429      | BCMO1                  | 0.023773 | 5.91  | 5.82  | 5.69  | 5.59  | 5.70  | 5.72  | 6.35  | 6.24  | 6.79  | 7.04  | 7.01  | 6.95  | 7.45  | 7.36  | 7.70  | 6.62  | 6.85                  | 7.30  | 1.37 |
| 9               | 200629_at      | NM_004184      | WARS                   | 0.000000 | 9.56  | 9.54  | 9.68  | 10.59 | 10.53 | 10.25 | 10.94 | 10.92 | 10.78 | 12.35 | 12.66 | 12.68 | 12.81 | 12.92 | 12.95 | 12.73 | 12.77                 | 12.70 | 1.30 |
| 9               | 210845_s_at    | U08839         | PLAUR                  | 0.001874 | 8.44  | 8.54  | 8.63  | 9.53  | 9.94  | 9.09  | 10.70 | 10.80 | 9.97  | 11.36 | 11.59 | 11.47 | 12.11 | 12.02 | 11.72 | 11.48 | 11.50                 | 10.98 | 1.41 |
| 9               | 241418_at      | AI819386       | LOC344887              | 0.020686 | 8.42  | 9.06  | 8.88  | 9.18  | 9.28  | 8.91  | 9.48  | 9.46  | 9.49  | 9.95  | 10.23 | 10.39 | 10.62 | 10.72 | 10.72 | 10.17 | 10.31                 | 9.85  | 1.62 |
| 9               | 207375_s_at    | NM_002189      | IL15RA                 | 0.000652 | 7.81  | 7.75  | 7.74  | 7.85  | 7.95  | 7.58  | 8.47  | 8.41  | 8.30  | 8.78  | 8.73  | 8.78  | 9.09  | 8.98  | 9.04  | 8.88  | 8.84                  | 9.19  | 0.85 |
| 9               | 229548_at      | BG231709       | UNC84B                 | 0.013191 | 7.02  | 6.76  | 6.61  | 7.31  | 7.06  | 6.65  | 7.86  | 7.80  | 7.42  | 8.15  | 8.18  | 8.18  | 8.77  | 8.54  | 8.40  | 8.36  | 8.37                  | 8.39  | 1.18 |
| 9               | 226743_at      | AW003459       | FLJ34922               | 0.005647 | 5.76  | 5.60  | 5.43  | 5.72  | 5.70  | 5.72  | 5.91  | 5.95  | 5.93  | 6.18  | 6.23  | 6.25  | 6.53  | 6.40  | 6.42  | 6.23  | 6.26                  | 6.43  | 1.33 |
| 9               | 204972_at      | NM_016817      | OAS2                   | 0.000003 | 6.92  | 6.70  | 6.49  | 6.63  | 6.71  | 7.26  | 8.91  | 8.93  | 8.61  | 10.38 | 10.68 | 10.81 | 10.25 | 10.36 | 10.54 | 9.48  | 9.17                  | 9.41  | 1.27 |
| 9               | 209040_s_at    | U17496         | PSMB8                  | 0.000893 | 7.84  | 8.24  | 8.10  | 7.65  | 7.74  | 7.07  | 9.45  | 9.28  | 9.02  | 10.22 | 10.12 | 10.57 | 9.55  | 9.55  | 9.82  | 9.60  | 9.81                  | 9.93  | 1.50 |
| 9               | 218776_s_at    | NM_024956      | TMEM62                 | 0.028344 | 8.08  | 7.99  | 7.85  | 7.90  | 7.78  | 7.67  | 8.30  | 8.25  | 8.17  | 8.69  | 8.64  | 8.58  | 8.54  | 8.66  | 8.44  | 8.30  | 8.27                  | 8.45  | 1.87 |
| 9               | 210056_at      | U69563         | RND1                   | 0.001098 | 8.46  | 8.53  | 8.34  | 7.38  | 7.85  | 7.39  | 8.99  | 9.01  | 8.73  | 9.86  | 9.81  | 9.96  | 9.96  | 9.88  | 9.43  | 9.30  | 9.38                  | 9.07  | 1.89 |
| 9               | 225582_at      | AA425726       | KIAA1754               | 0.002443 | 8.35  | 8.30  | 8.28  | 8.54  | 8.60  | 8.58  | 8.95  | 8.97  | 8.93  | 9.21  | 9.21  | 9.10  | 9.54  | 9.36  | 9.37  | 8.90  | 9.12                  | 9.29  | 1.50 |
| 9               | 219684_at      | NM_0022147     | IFRG28                 | 0.002657 | 6.29  | 5.87  | 5.73  | 5.82  | 6.44  | 6.15  | 7.36  | 7.34  | 7.30  | 7.88  | 7.88  | 8.02  | 8.19  | 8.09  | 8.39  | 7.37  | 7.44                  | 7.90  | 1.21 |
| 9               | 210015_s_at    | U89330         | MAP2                   | 0.045049 | 7.28  | 6.86  | 6.99  | 7.33  | 7.65  | 7.47  | 7.53  | 7.63  | 7.65  | 8.05  | 8.26  | 8.12  | 8.14  | 8.44  | 8.50  | 7.95  | 8.01                  | 8.12  | 1.89 |
| 9               | 217995_at      | NM_021199      | SQRDL                  | 0.010124 | 9.88  | 10.29 | 10.17 | 9.90  | 10.00 | 10.09 | 10.72 | 10.67 | 10.94 | 11.13 | 11.28 | 11.21 | 11.24 | 11.16 | 11.37 | 10.88 | 11.08                 | 11.29 | 1.02 |
| 9               | 201762_s_at    | NM_002818      | PSME2                  | 0.045478 | 10.27 | 10.24 | 10.30 | 10.03 | 10.00 | 10.21 | 10.80 | 10.71 | 11.01 | 11.40 | 11.49 | 11.56 | 11.30 | 11.22 | 11.83 | 11.22 | 11.49                 | 11.77 | 1.15 |
| 9               | 230532_at      | BF001685       | CXorf38                | 0.009396 | 7.09  | 7.35  | 7.16  | 7.25  | 7.35  | 7.18  | 8.29  | 7.89  | 8.13  | 8.54  | 8.29  | 8.36  | 8.33  | 8.10  | 8.55  | 8.36  | 8.46                  | 8.51  | 1.14 |
| 9               | 209546_s_at    | AF323540       | APOL1                  | 0.000011 | 8.28  | 8.15  | 8.22  | 8.31  | 8.43  | 8.35  | 9.12  | 9.11  | 9.00  | 9.75  | 9.92  | 10.12 | 9.81  | 9.78  | 9.90  | 9.60  | 9.64                  | 9.88  | 0.88 |
| 9               | 201601_x_at    | NM_003641      | IFITM1                 | 0.000008 | 7.50  | 7.13  | 7.13  | 6.92  | 7.14  | 6.94  | 10.14 | 9.84  | 8.97  | 11.09 | 11.28 | 11.52 | 11.42 | 11.27 | 11.41 | 10.78 | 10.89                 | 10.74 | 0.76 |
| 9               | 230405_at      | AI143416       | LOC441109              | 0.000030 | 7.94  | 7.71  | 7.66  | 7.85  | 7.33  | 7.78  | 9.14  | 8.88  | 8.77  | 9.71  | 9.77  | 9.61  | 9.98  | 9.95  | 10.06 | 9.44  | 9.60                  | 9.46  | 0.87 |
| 9               | 214022_s_at    | AA749101       | IFITM1                 | 0.000000 | 7.51  | 7.79  | 7.49  | 7.22  | 7.26  | 7.55  | 10.69 | 10.44 | 10.08 | 11.57 | 11.66 | 11.80 | 11.85 | 11.66 | 12.18 | 11.28 | 11.50                 | 11.83 | 0.58 |
| 9               | 219352_at      | NM_017912      | HERC6                  | 0.000000 | 6.49  | 6.80  | 6.68  | 6.46  | 6.73  | 6.49  | 9.38  | 9.33  | 9.31  | 10.25 | 10.48 | 10.51 | 10.08 | 10.12 | 10.25 | 10.08 | 10.15                 | 10.44 | 0.75 |
| 9               | 214791_at      | AK023116       | LOC93349               | 0.000006 | 5.93  | 5.59  | 5.80  | 5.89  | 5.92  | 5.71  | 7.35  | 7.40  | 7.55  | 8.31  | 8.39  | 8.17  | 8.15  | 8.22  | 8.30  | 7.99  | 8.04                  | 8.55  | 0.73 |
| 9               | 228617_at      | AA142842       | BIRC4BP                | 0.000014 | 6.28  | 6.16  | 6.27  | 6.24  | 5.94  | 6.78  | 8.69  | 8.38  | 9.25  | 10.01 | 10.10 | 10.16 | 10.68 | 10.43 | 11.20 | 10.29 | 10.56                 | 10.65 | 0.56 |
| 9               | 223434_at      | AL136680       | GBP3                   | 0.000003 | 5.68  | 5.36  | 5.44  | 5.23  | 5.43  | 5.57  | 8.77  | 8.41  | 9.12  | 9.83  | 9.83  | 9.74  | 10.29 | 10.19 | 10.89 | 9.50  | 9.90                  | 10.46 | 0.62 |
| 9               | 221653_x_at    | BC004395       | APOL2                  | 0.002845 | 8.23  | 7.87  | 8.06  | 7.79  | 8.08  | 8.57  | 9.56  | 9.53  | 9.86  | 10.13 | 10.06 | 10.26 | 9.87  | 9.91  | 10.38 | 10.32 | 10.39                 | 10.82 | 1.16 |
| 9               | 229450_at      | AI075407       | IFIT3                  | 0.000000 | 6.06  | 6.04  | 5.85  | 7.69  | 8.06  | 8.32  | 12.73 | 12.69 | 13.17 | 12.88 | 13.06 | 12.88 | 13.24 | 13.18 | 13.54 | 13.30 | 13.37                 | 13.42 | 1.43 |
| 9               | 226702_at      | AI742057       | LOC129607              | 0.000000 | 5.01  | 5.68  | 5.50  | 5.95  | 6.70  | 6.27  | 11.50 | 11.30 | 11.89 | 12.04 | 12.12 | 12.22 | 12.29 | 12.26 | 12.66 | 12.30 | 12.31                 | 12.66 | 1.07 |
| 9               | 226757_at      | AA131041       | IFIT2                  | 0.000000 | 5.12  | 5.27  | 5.05  | 5.42  | 5.57  | 5.65  | 12.56 | 12.50 | 13.07 | 12.88 | 13.08 | 13.08 | 13.31 | 13.30 | 13.55 | 13.72 | 13.68                 | 13.89 | 1.10 |
| 9               | 228531_at      | AA741307       | SAMD9                  | 0.000000 | 4.92  | 5.11  | 4.71  | 5.62  | 5.68  | 6.02  | 9.16  | 9.00  | 9.67  | 9.46  | 9.40  | 9.72  | 9.47  | 9.41  | 9.78  | 9.65  | 9.70                  | 10.19 | 1.27 |
| 9               | 235157_at      | AW297731       | PARP14                 | 0.000556 | 6.90  | 6.94  | 6.99  | 7.37  | 7.09  | 6.99  | 9.74  | 10.18 | 10.94 | 10.18 | 11.00 | 10.94 | 11.39 | 10.95 | 11.72 | 11.29 | 11.69                 | 12.32 | 1.05 |
| 9               | 203596_s_at    | NM_012420      | IFIT5                  | 0.000001 | 7.99  | 7.77  | 7.85  | 8.22  | 8.58  | 8.57  | 10.58 | 10.59 | 10.97 | 10.94 | 11.11 | 10.98 | 11.55 | 11.49 | 11.92 | 11.11 | 11.43                 | 11.50 | 0.95 |
| 9               | 227458_at      | AI608902       | CD274                  | 0.000001 | 6.18  | 5.40  | 5.47  | 5.77  | 5.99  | 5.97  | 9.34  | 9.49  | 9.80  | 9.83  | 9.74  | 10.18 | 10.69 | 10.70 | 11.02 | 9.95  | 10.22                 | 10.64 | 0.90 |
| 9               | 227404_s_at    | AI459194       | EGR1                   | 0.000004 | 7.07  | 6.80  | 7.02  | 7.38  | 6.90  | 8.57  | 12.16 | 12.07 | 12.97 | 12.82 | 12.64 | 12.62 | 13.53 | 13.45 | 13.78 | 13.91 | 13.96                 | 13.88 | 1.06 |
| 9               | 208965_s_at    | BG256677       | IFI16                  | 0.000002 | 4.60  | 4.86  | 4.67  | 5.10  | 4.87  | 5.30  | 8.56  | 8.02  | 8.38  | 8.96  | 8.53  | 8.70  | 9.58  | 8.95  | 9.41  | 9.20  | 9.56                  | 10.04 | 0.92 |
| 9               | 214453_s_at    | NM_006417      | IFI44                  | 0.000003 | 6.49  | 5.73  | 6.38  | 6.43  | 6.90  | 6.52  | 9.41  | 9.31  | 9.83  | 10.03 | 10.11 | 10.50 | 10.48 | 10.69 | 10.83 | 10.99 | 11.24                 | 11.55 | 0.87 |
| 9               | 219209_at      | NM_022168      | IFIH1                  | 0.000000 | 4.92  | 5.05  | 5.02  | 5.07  | 5.79  | 5.73  | 10.29 | 10.26 | 10.69 | 11.40 | 11.56 | 11.80 | 12.15 | 12.09 | 12.48 | 12.65 | 12.62                 | 12.78 | 0.67 |
| 9               | 219863_at      | NM_016323      | HERC5                  | 0.000000 | 6.79  | 6.84  | 6.86  | 7.33  | 7.12  | 7.78  | 11.45 | 11.33 | 11.80 | 12.50 | 12.50 | 12.46 | 12.99 | 13.00 | 13.23 | 13.32 | 13.37                 | 13.40 | 0.72 |
| 9               | 218943_s_at    | NM_014314      | DDX58                  | 0.000000 | 6.01  | 5.91  | 5.79  | 6.58  | 7.09  | 7.38  | 10.39 | 10.36 | 11.30 | 11.72 | 11.70 | 11.99 | 12.46 | 12.48 |       |       |                       |       |      |

| K-Mean<br>Order | Probe<br>Names | GBID      | Gene<br>Symbol | Adj. p-Value<br>≤0.05, |       |       |       |       |       |       |       |       |       |       |       |       |       |       |       |       |       |       | K-Means<br>Similarity |
|-----------------|----------------|-----------|----------------|------------------------|-------|-------|-------|-------|-------|-------|-------|-------|-------|-------|-------|-------|-------|-------|-------|-------|-------|-------|-----------------------|
|                 |                |           |                | Bonferroni             | c1    | c2    | c3    | 6h1   | 6h2   | 6h3   | 12h1  | 12h2  | 12h3  | 24h1  | 24h2  | 24h3  | 48h1  | 48h2  | 48h3  | 72h1  | 72h2  | 72h3  |                       |
| 9               | 235061_at      | AV706522  | PPM1K          | 0.000001               | 4.64  | 4.92  | 4.95  | 4.58  | 4.66  | 4.94  | 8.38  | 8.14  | 8.77  | 9.11  | 9.14  | 8.82  | 9.85  | 9.54  | 9.86  | 9.71  | 10.05 | 9.69  | 0.72                  |
| 9               | 217502_at      | BE888744  | IFIT2          | 0.000000               | 7.08  | 7.44  | 7.43  | 7.56  | 7.16  | 7.22  | 11.75 | 11.48 | 11.62 | 12.14 | 12.05 | 12.46 | 13.04 | 13.08 | 13.13 | 13.46 | 13.35 | 13.17 | 0.73                  |
| 9               | 202531_at      | NM_002198 | IRF1           | 0.000000               | 7.70  | 7.87  | 7.83  | 7.66  | 7.74  | 7.38  | 10.93 | 11.06 | 10.63 | 11.07 | 11.14 | 11.17 | 11.68 | 11.52 | 11.69 | 11.79 | 11.87 | 11.45 | 0.89                  |
| 9               | 204747_at      | NM_001549 | IFIT3          | 0.000005               | 7.14  | 7.36  | 7.16  | 7.35  | 7.68  | 7.22  | 12.12 | 11.65 | 10.98 | 12.39 | 12.22 | 11.88 | 13.05 | 12.76 | 12.31 | 12.77 | 12.67 | 12.04 | 0.97                  |
| 9               | 204439_at      | NM_006820 | IFI44L         | 0.000540               | 5.25  | 5.10  | 5.08  | 5.16  | 5.56  | 4.87  | 7.66  | 7.54  | 8.44  | 7.84  | 8.11  | 8.15  | 7.97  | 8.64  | 8.78  | 7.97  | 7.98  | 7.87  | 1.27                  |
| 9               | 202307_s_at    | NM_000593 | TAP1           | 0.000001               | 7.96  | 7.87  | 7.94  | 7.91  | 8.36  | 7.83  | 9.78  | 9.82  | 9.87  | 10.65 | 10.75 | 10.84 | 10.39 | 10.33 | 10.65 | 10.25 | 10.48 | 10.24 | 0.93                  |
| 9               | 218543_s_at    | NM_022750 | PARP12         | 0.000018               | 7.15  | 7.54  | 7.30  | 7.81  | 8.20  | 7.19  | 10.51 | 10.43 | 9.93  | 11.14 | 11.28 | 11.41 | 10.88 | 11.03 | 11.02 | 10.75 | 10.96 | 10.84 | 1.07                  |
| 9               | 218400_at      | NM_006187 | OAS3           | 0.000010               | 7.30  | 7.96  | 7.91  | 7.83  | 8.00  | 8.13  | 10.15 | 10.30 | 10.58 | 11.04 | 11.25 | 11.57 | 11.04 | 11.17 | 11.49 | 10.80 | 10.62 | 10.85 | 0.99                  |
| 9               | 213293_s_at    | AA083478  | TRIM22         | 0.000000               | 5.49  | 5.88  | 5.60  | 5.48  | 5.67  | 5.40  | 9.94  | 9.83  | 10.26 | 11.30 | 11.52 | 11.59 | 11.19 | 11.21 | 11.87 | 10.35 | 10.60 | 10.79 | 0.91                  |
| 9               | 226603_at      | BE966604  | SAMD9L         | 0.000005               | 6.51  | 6.41  | 6.71  | 6.04  | 6.40  | 6.55  | 8.82  | 8.74  | 9.09  | 9.67  | 9.84  | 9.90  | 9.49  | 9.61  | 10.12 | 9.06  | 9.05  | 9.36  | 1.04                  |
| 9               | 226773_at      | AW290940  | ---            | 0.000217               | 7.18  | 7.62  | 7.53  | 7.28  | 7.86  | 7.88  | 9.45  | 9.29  | 9.45  | 9.72  | 9.90  | 9.92  | 9.93  | 9.96  | 9.89  | 9.50  | 9.53  | 10.02 | 1.06                  |
| 9               | 204415_at      | NM_022873 | GIP3           | 0.002544               | 6.78  | 6.98  | 6.88  | 7.26  | 6.73  | 7.33  | 10.12 | 9.65  | 9.11  | 10.69 | 10.32 | 10.09 | 11.09 | 10.60 | 10.27 | 11.16 | 10.76 | 9.93  | 1.09                  |
| 9               | 229521_at      | BE466274  | FLJ36031       | 0.000753               | 8.48  | 8.61  | 8.58  | 8.53  | 8.50  | 8.60  | 9.16  | 9.00  | 9.03  | 9.21  | 9.11  | 9.26  | 9.31  | 9.18  | 9.26  | 9.25  | 9.30  | 9.14  | 0.93                  |
| 9               | 205192_at      | NM_003954 | MAP3K14        | 0.020085               | 7.96  | 7.90  | 7.94  | 7.77  | 8.08  | 7.44  | 9.34  | 9.51  | 8.47  | 9.98  | 10.16 | 10.08 | 10.22 | 10.20 | 9.95  | 10.12 | 10.12 | 9.54  | 1.13                  |
| 9               | 205483_s_at    | NM_005101 | GIP2           | 0.001615               | 7.89  | 8.00  | 7.85  | 8.53  | 9.01  | 7.00  | 12.64 | 12.46 | 10.77 | 13.36 | 13.44 | 13.42 | 13.59 | 13.64 | 13.38 | 13.91 | 13.98 | 13.41 | 0.97                  |
| 9               | 213261_at      | AA035414  | LBA1           | 0.032622               | 8.14  | 7.94  | 8.07  | 7.93  | 8.31  | 8.20  | 9.32  | 9.36  | 8.68  | 9.87  | 10.12 | 9.99  | 10.21 | 10.28 | 9.71  | 9.76  | 9.54  | 9.13  | 1.49                  |
| 9               | 1562031_at     | BC043187  | JAK2           | 0.014013               | 5.46  | 5.56  | 5.64  | 5.57  | 5.57  | 5.50  | 6.53  | 6.71  | 7.03  | 6.55  | 7.20  | 6.72  | 7.36  | 7.50  | 7.11  | 6.50  | 6.66  | 6.69  | 1.72                  |
| 9               | 236156_at      | AW961916  | LIPA           | 0.006938               | 6.00  | 5.64  | 5.48  | 6.09  | 5.92  | 5.73  | 8.18  | 8.29  | 9.05  | 8.28  | 8.59  | 7.09  | 9.57  | 9.17  | 9.66  | 9.11  | 9.05  | 8.97  | 1.63                  |
| 9               | 235421_at      | AV713062  | MAP3K8         | 0.000514               | 7.51  | 7.52  | 7.29  | 7.95  | 7.57  | 7.83  | 8.53  | 8.76  | 9.17  | 8.89  | 9.27  | 9.21  | 10.06 | 10.11 | 10.48 | 9.24  | 9.21  | 9.39  | 1.49                  |
| 9               | 238039_at      | BG180437  | ---            | 0.003066               | 8.22  | 8.20  | 7.96  | 8.45  | 8.14  | 8.45  | 9.10  | 8.95  | 9.29  | 9.16  | 8.96  | 9.13  | 9.43  | 9.44  | 9.57  | 9.22  | 9.30  | 9.33  | 1.43                  |
| 9               | 229373_at      | AW139719  | ---            | 0.000118               | 7.15  | 7.02  | 6.99  | 6.95  | 6.93  | 6.86  | 7.43  | 7.51  | 7.38  | 8.17  | 8.02  | 8.28  | 8.73  | 8.72  | 8.80  | 7.52  | 7.71  | 7.21  | 2.49                  |
| 9               | 206576_s_at    | NM_001712 | CEACAM1        | 0.029277               | 7.56  | 7.47  | 7.48  | 7.55  | 7.51  | 7.51  | 7.91  | 7.82  | 7.59  | 8.27  | 8.21  | 8.61  | 8.42  | 8.46  | 8.53  | 7.99  | 7.90  | 7.80  | 2.29                  |
| 9               | 209970_x_at    | M87507    | CASP1          | 0.033029               | 6.82  | 6.64  | 6.55  | 6.52  | 6.55  | 6.64  | 6.83  | 6.74  | 6.77  | 7.44  | 7.80  | 7.63  | 7.36  | 7.56  | 7.70  | 6.91  | 7.08  | 7.22  | 2.39                  |
| 9               | 1552703_s_at   | NM_052889 | CASP1 /// COP1 | 0.000039               | 5.15  | 5.20  | 5.20  | 5.04  | 5.19  | 5.15  | 5.27  | 5.28  | 5.21  | 5.87  | 6.06  | 5.98  | 5.78  | 5.75  | 5.81  | 5.51  | 5.58  | 5.55  | 2.29                  |
| 9               | 219343_at      | NM_017913 | CDC37L1        | 0.000901               | 7.84  | 8.15  | 8.00  | 7.35  | 7.42  | 7.56  | 8.15  | 8.26  | 8.69  | 9.24  | 9.36  | 9.36  | 9.80  | 9.65  | 9.95  | 8.67  | 8.66  | 9.10  | 1.85                  |
| 9               | 206796_at      | NM_003882 | WISP1          | 0.015047               | 5.73  | 5.73  | 5.60  | 5.70  | 5.68  | 5.86  | 6.06  | 6.10  | 6.17  | 6.53  | 6.51  | 6.61  | 6.75  | 6.62  | 6.74  | 6.17  | 6.16  | 6.55  | 1.60                  |
| 9               | 223501_at      | AW151360  | TNFSF13B       | 0.005587               | 6.71  | 6.64  | 6.34  | 6.67  | 6.66  | 6.49  | 7.07  | 6.92  | 6.97  | 8.53  | 8.13  | 8.61  | 8.50  | 8.40  | 9.08  | 7.55  | 7.77  | 8.06  | 1.87                  |
| 9               | 205692_s_at    | NM_001775 | CD38           | 0.000028               | 7.40  | 7.51  | 7.54  | 7.46  | 7.56  | 7.56  | 8.03  | 8.02  | 7.93  | 8.97  | 9.23  | 9.24  | 9.23  | 9.31  | 9.63  | 8.45  | 8.56  | 8.76  | 1.63                  |
| 9               | 223502_s_at    | AF134715  | TNFSF13B       | 0.000820               | 5.00  | 5.23  | 5.19  | 5.26  | 5.40  | 5.15  | 6.53  | 6.24  | 7.02  | 8.47  | 8.31  | 8.19  | 8.28  | 8.14  | 9.01  | 7.07  | 7.86  | 7.59  | 1.25                  |
| 9               | 201695_s_at    | NM_000270 | NP             | 0.000133               | 8.54  | 8.85  | 8.79  | 8.78  | 8.86  | 8.81  | 9.09  | 9.15  | 9.15  | 9.73  | 9.68  | 9.84  | 9.70  | 9.70  | 9.75  | 9.38  | 9.47  | 9.47  | 1.40                  |
| 9               | 227376_at      | AW021102  | LOC402485      | 0.040995               | 6.20  | 6.05  | 6.22  | 6.31  | 6.30  | 6.27  | 6.52  | 6.25  | 6.36  | 6.86  | 6.96  | 7.01  | 6.82  | 6.71  | 6.65  | 6.81  | 6.68  | 6.92  | 2.03                  |
| 9               | 202887_s_at    | NM_019058 | DDIT4          | 0.007290               | 11.39 | 11.86 | 11.77 | 10.13 | 10.32 | 9.53  | 11.36 | 11.42 | 11.06 | 12.30 | 12.34 | 12.36 | 12.02 | 11.99 | 11.90 | 11.99 | 12.09 | 11.93 | 3.02                  |
| 9               | 201170_s_at    | NM_003670 | BHLHB2         | 0.000708               | 10.40 | 10.94 | 10.97 | 9.14  | 9.36  | 9.32  | 10.55 | 10.77 | 11.03 | 11.56 | 11.78 | 11.88 | 11.51 | 11.38 | 11.60 | 11.45 | 11.50 | 11.38 | 2.40                  |
| 10              | 228381_at      | AV716964  | ATF7IP2        | 0.017751               | 7.12  | 7.07  | 7.05  | 7.28  | 7.44  | 7.48  | 7.43  | 7.35  | 7.47  | 7.18  | 7.04  | 7.13  | 6.76  | 6.68  | 6.50  | 6.73  | 6.85  | 6.87  | 2.21                  |
| 10              | 211056_s_at    | BC006373  | SRD5A1         | 0.002254               | 8.38  | 8.34  | 8.37  | 8.49  | 8.55  | 8.23  | 8.45  | 8.43  | 8.21  | 8.18  | 8.16  | 7.96  | 7.82  | 7.99  | 7.58  | 7.31  | 7.55  | 1.59  |                       |
| 10              | 219077_s_at    | NM_016373 | WWOX           | 0.008242               | 9.78  | 9.73  | 9.76  | 9.90  | 9.63  | 10.20 | 9.29  | 9.41  | 9.70  | 9.12  | 8.98  | 8.98  | 8.46  | 7.93  | 8.65  | 7.80  | 7.49  | 7.80  | 1.24                  |
| 10              | 223470_at      | AB028127  | PIGM           | 0.026313               | 8.30  | 8.42  | 8.28  | 8.35  | 8.31  | 8.45  | 8.21  | 8.28  | 8.48  | 7.96  | 8.04  | 8.04  | 7.81  | 7.80  | 7.70  | 7.50  | 7.17  | 7.52  | 1.50                  |
| 10              | 214036_at      | BE464799  | ---            | 0.005613               | 9.35  | 9.28  | 9.09  | 9.49  | 9.24  | 9.58  | 9.30  | 9.17  | 9.52  | 8.82  | 8.66  | 8.86  | 8.56  | 8.46  | 8.68  | 8.12  | 7.96  | 8.08  | 1.59                  |
| 10              | 217722_s_at    | NM_016645 | NGRN           | 0.017077               | 10.50 | 10.90 | 10.89 | 11.27 | 11.28 | 11.24 | 10.93 | 10.98 | 11.18 | 10.70 | 10.67 | 11.02 | 9.72  | 9.64  | 9.96  | 10.09 | 10.12 | 10.28 | 1.66                  |
| 10              | 1555851_s_at   | AW514401  | SEPW1          | 0.044993               | 9.56  | 9.70  | 9.59  | 9.83  | 9.75  | 9.72  | 9.69  | 9.66  | 9.55  | 9.48  | 9.48  | 9.51  | 8.60  | 8.52  | 9.02  | 8.96  | 9.04  | 9.12  | 1.57                  |
| 10              | 210434_x_at    | AF151056  | JTB            | 0.008489               | 11.20 | 11.49 | 11.42 | 11.76 | 11.66 | 11.64 | 11.29 | 11.22 | 11.50 | 11.02 | 11.01 | 11.26 | 10.18 | 10.21 | 10.54 | 10.41 | 10.49 | 10.62 | 1.16                  |
| 10              | 200048_s_at    | NM_006694 | JTB            | 0.018352               | 11.12 | 11.49 | 11.47 | 11.73 | 11.74 | 11.71 | 11.40 | 11.25 | 11.54 | 11.19 | 11.09 | 11.40 | 10.07 | 10.13 | 10.53 | 10.39 | 10.46 | 10.58 | 1.17                  |
| 10              | 224665_at      | BE874771  | C10orf104      | 0.016035               | 10.03 | 10.47 | 10.34 | 10.71 | 10.62 | 10.58 | 10.23 | 10.80 | 10.30 | 10.00 | 9.79  | 10.35 | 8.75  | 8.76  | 9.14  | 9.10  | 9.33  | 9.05  | 1.25                  |
| 10              | 222992_s_at    | AF261090  | NDUFB9         | 0.000753               | 11.54 | 11.65 | 11.59 | 12.11 | 11.99 | 11.82 | 11.67 | 11.53 | 11.77 | 11.37 | 11.21 | 11.55 | 9.73  | 9.64  | 10.22 | 10.17 | 10.48 | 10.24 | 1.20                  |
| 10              | 215416_s_at    | AC004472  | STOML2         | 0.002489               | 9.75  | 9.90  | 9.91  | 10.27 | 10.20 | 9.95  | 9.96  | 9.75  | 9.70  | 9.64  | 9.53  | 9.76  | 8.49  | 8.32  | 8.84  | 8.78  | 8.80  | 8.72  | 1.17                  |
| 10              | 200030_s_at    | NM_002635 | SLC25A3        | 0.003174               | 13.01 | 13.12 | 13.20 | 13.06 | 13.03 | 13.21 | 12.89 | 12.97 | 13.16 | 12.53 | 12.61 | 12.76 | 11.79 | 11.79 | 11.99 | 12.09 | 12.12 | 12.42 | 1.35                  |
| 10              | 208683_at      | M23254    | CAPN2          | 0.005191               | 11.69 | 12.09 | 12.09 | 12.29 | 12.17 | 12.42 | 11.76 | 11.81 | 12.08 | 11.42 | 11.47 | 11.75 | 10.45 | 10.35 | 10.68 | 10.78 | 10.80 | 11.03 | 1.26                  |
| 10              | 218167_at      | NM_016627 | AMZ2           | 0.026090               | 10.48 | 10.95 | 10.92 | 11.16 | 11.01 | 11.64 | 10.55 | 10.62 | 11.19 | 10.23 | 10.22 | 10.49 | 8.68  | 8.64  | 9.24  | 9.03  | 8.98  | 9.38  | 1.03                  |
| 10              | 200631_s_at    | NM_003011 | SET            | 0.036158               | 11.21 | 11.63 | 11.60 | 11.58 | 11.53 | 11.77 | 11.23 | 11.20 | 11.61 | 11.06 | 11.15 | 11.34 | 10.18 | 9.94  | 10.38 | 10.23 | 10.23 | 10.46 | 0.89                  |
| 10              | 211325_x_at    | U72518    | LOC171220      | 0.002398               | 8.61  | 8.81  | 8.82  | 8.70  | 8.64  | 8.72  | 8.50  | 8.42  | 8.60  | 8.39  | 8.37  | 8.40  | 7.83  | 7.67  | 7.84  | 8.10  | 7.84  | 7.89  | 1.34                  |
| 10              | 223035_s_at    | AF161521  | FARSLB         | 0.000001               | 10.77 | 10.90 | 10.86 | 10.90 | 10.89 | 10.90 | 10.61 | 10.61 | 1     |       |       |       |       |       |       |       |       |       |                       |

| K-Mean<br>Order | Probe<br>Names | GBID      | Gene<br>Symbol | Adj. p-Value<br>≤0.05, |       |       |       |       |       |       |       |       |       |       |       |       |       |       |       |       |       |       | K-Means<br>Similarity |
|-----------------|----------------|-----------|----------------|------------------------|-------|-------|-------|-------|-------|-------|-------|-------|-------|-------|-------|-------|-------|-------|-------|-------|-------|-------|-----------------------|
|                 |                |           |                | Bonferroni             | c1    | c2    | c3    | 6h1   | 6h2   | 6h3   | 12h1  | 12h2  | 12h3  | 24h1  | 24h2  | 24h3  | 48h1  | 48h2  | 48h3  | 72h1  | 72h2  | 72h3  |                       |
| 10              | 200640_at      | NM_003406 | YWHAZ          | 0.038192               | 11.59 | 12.07 | 12.12 | 11.91 | 11.87 | 11.92 | 11.51 | 11.62 | 11.74 | 11.21 | 11.46 | 11.66 | 10.77 | 10.70 | 10.94 | 10.60 | 10.41 | 10.63 | 1.04                  |
| 10              | 205216_s_at    | NM_000042 | APOH           | 0.014658               | 8.80  | 8.81  | 8.60  | 8.24  | 7.94  | 8.44  | 8.60  | 7.79  | 8.36  | 7.64  | 7.38  | 7.84  | 6.78  | 6.87  | 6.72  | 6.78  | 6.65  | 6.54  | 1.57                  |
| 10              | 231819_at      | BG505096  | CEBPZ          | 0.029242               | 7.29  | 7.57  | 7.46  | 6.84  | 6.93  | 7.39  | 7.37  | 7.16  | 7.41  | 6.69  | 6.95  | 6.48  | 6.23  | 6.09  | 5.92  | 5.87  | 5.99  | 5.77  | 1.64                  |
| 10              | 229874_x_at    | BE865517  | LOC400741      | 0.017476               | 9.38  | 9.44  | 9.40  | 9.19  | 9.31  | 9.35  | 9.44  | 9.36  | 9.45  | 9.26  | 9.04  | 9.07  | 8.64  | 8.69  | 8.81  | 8.59  | 8.75  | 8.85  | 1.24                  |
| 10              | 203582_s_at    | NM_004578 | RAB4A          | 0.039394               | 8.13  | 8.90  | 8.94  | 8.01  | 8.24  | 8.18  | 8.27  | 8.28  | 8.81  | 7.59  | 7.65  | 7.95  | 6.81  | 6.85  | 6.96  | 6.75  | 6.57  | 6.63  | 1.32                  |
| 10              | 226696_at      | AI761595  | RBBP9          | 0.010631               | 8.29  | 8.55  | 8.46  | 7.70  | 7.69  | 8.15  | 8.09  | 7.94  | 8.56  | 7.46  | 7.43  | 7.56  | 6.54  | 6.51  | 6.82  | 6.60  | 6.59  | 6.86  | 1.44                  |
| 10              | 203115_at      | AU152635  | FECH           | 0.007252               | 7.34  | 7.69  | 7.53  | 7.44  | 7.41  | 7.71  | 7.14  | 7.07  | 7.67  | 6.83  | 6.75  | 6.93  | 5.90  | 6.11  | 5.82  | 6.15  | 5.93  | 6.01  | 1.16                  |
| 10              | 226860_at      | AW572609  | TMEM19         | 0.013995               | 9.33  | 9.59  | 9.41  | 8.99  | 8.94  | 9.37  | 8.87  | 8.93  | 9.39  | 8.41  | 8.35  | 8.34  | 6.80  | 6.50  | 7.45  | 7.29  | 6.44  | 7.02  | 1.03                  |
| 10              | 226806_s_at    | AW022607  | ---            | 0.011623               | 9.29  | 9.29  | 9.08  | 9.10  | 8.54  | 8.89  | 8.69  | 8.75  | 9.15  | 8.43  | 8.25  | 8.35  | 7.36  | 7.39  | 7.54  | 7.13  | 7.10  | 7.68  | 1.17                  |
| 10              | 221909_at      | AW299700  | FLJ14627       | 0.010450               | 8.21  | 8.58  | 8.47  | 8.31  | 8.14  | 8.23  | 7.88  | 7.87  | 8.27  | 7.64  | 7.33  | 7.71  | 6.95  | 6.50  | 6.89  | 6.33  | 6.61  | 6.81  | 1.02                  |
| 10              | 214307_at      | AI478172  | HGD            | 0.017169               | 7.06  | 7.40  | 7.17  | 7.03  | 7.07  | 7.09  | 6.77  | 6.79  | 7.16  | 6.47  | 6.30  | 6.58  | 5.64  | 5.86  | 5.98  | 5.55  | 5.65  | 6.03  | 1.09                  |
| 10              | 234980_at      | AI004375  | TMEM56         | 0.008700               | 8.09  | 8.14  | 8.31  | 8.08  | 7.97  | 8.21  | 7.73  | 7.73  | 8.23  | 7.40  | 7.27  | 7.55  | 6.72  | 6.72  | 6.74  | 6.51  | 6.29  | 6.84  | 1.05                  |
| 10              | 203006_at      | NM_005539 | INPP5A         | 0.001429               | 9.32  | 9.61  | 9.62  | 9.19  | 9.28  | 9.17  | 9.26  | 9.21  | 9.49  | 8.43  | 8.24  | 8.54  | 7.74  | 7.66  | 8.00  | 7.54  | 7.58  | 8.05  | 1.30                  |
| 10              | 226272_at      | N25986    | ---            | 0.001465               | 8.44  | 8.86  | 8.82  | 8.36  | 8.53  | 8.50  | 8.49  | 8.32  | 8.71  | 7.84  | 7.60  | 8.14  | 6.75  | 6.66  | 7.01  | 6.68  | 6.66  | 6.93  | 0.76                  |
| 10              | 225601_at      | AI806853  | HMGGB3         | 0.001394               | 9.99  | 10.53 | 10.58 | 9.72  | 9.61  | 9.97  | 9.66  | 9.69  | 10.15 | 8.98  | 8.99  | 9.25  | 7.65  | 7.60  | 8.11  | 7.63  | 7.51  | 7.97  | 1.02                  |
| 10              | 225553_at      | AL042817  | CNIH           | 0.001609               | 9.00  | 9.16  | 9.13  | 8.58  | 8.58  | 8.86  | 8.54  | 8.50  | 9.15  | 7.88  | 7.89  | 7.98  | 6.98  | 6.69  | 7.16  | 6.82  | 6.65  | 7.13  | 1.11                  |
| 10              | 204547_at      | NM_006822 | RAB40B         | 0.001106               | 8.83  | 9.38  | 9.13  | 8.08  | 9.30  | 9.76  | 9.13  | 9.07  | 9.69  | 8.04  | 8.04  | 8.25  | 6.68  | 6.58  | 6.93  | 6.71  | 6.34  | 6.96  | 0.87                  |
| 10              | 226820_at      | W72455    | FLJ25476       | 0.004261               | 9.36  | 9.48  | 9.35  | 9.37  | 9.42  | 9.66  | 9.43  | 9.63  | 9.64  | 8.99  | 8.98  | 8.85  | 8.24  | 8.46  | 8.36  | 8.36  | 7.97  | 8.44  | 1.26                  |
| 10              | 202749_at      | NM_004627 | WRB            | 0.006558               | 9.42  | 9.55  | 9.54  | 9.35  | 9.12  | 10.03 | 9.01  | 8.93  | 10.09 | 7.91  | 7.71  | 8.02  | 6.57  | 6.50  | 7.00  | 6.38  | 6.46  | 6.71  | 1.15                  |
| 10              | 203581_at      | BC002438  | RAB4A          | 0.017795               | 8.44  | 8.66  | 8.61  | 8.49  | 8.56  | 8.90  | 8.50  | 8.36  | 9.30  | 7.41  | 7.23  | 7.44  | 6.24  | 5.84  | 6.66  | 6.06  | 6.51  | 6.74  | 1.26                  |
| 10              | 225001_at      | AI744658  | RAB3D          | 0.034868               | 7.64  | 7.94  | 7.67  | 7.65  | 7.59  | 7.72  | 7.67  | 7.75  | 7.73  | 7.42  | 7.45  | 7.31  | 7.18  | 7.24  | 7.08  | 6.93  | 6.85  | 7.06  | 1.55                  |
| 10              | 231846_at      | AK026975  | FLJ23322       | 0.004756               | 8.53  | 8.69  | 8.67  | 8.55  | 8.50  | 8.79  | 8.50  | 8.59  | 8.64  | 8.24  | 8.18  | 8.22  | 8.01  | 7.86  | 7.83  | 7.81  | 7.70  | 7.86  | 1.23                  |
| 10              | 202967_at      | NM_001512 | GSTA4          | 0.001720               | 8.71  | 8.81  | 8.69  | 8.62  | 8.64  | 8.87  | 8.76  | 8.60  | 8.71  | 8.17  | 8.34  | 8.34  | 7.95  | 7.98  | 8.00  | 7.84  | 7.71  | 7.91  | 1.21                  |
| 10              | 228959_at      | AI676241  | ---            | 0.000431               | 8.63  | 8.72  | 8.82  | 8.52  | 8.49  | 8.69  | 8.38  | 8.40  | 8.66  | 7.68  | 7.56  | 8.01  | 7.36  | 7.46  | 7.39  | 7.02  | 6.78  | 7.09  | 1.42                  |
| 10              | 225546_at      | W68180    | EEF2K          | 0.014622               | 8.08  | 8.41  | 8.35  | 8.08  | 7.97  | 8.23  | 8.15  | 8.04  | 8.37  | 7.70  | 7.67  | 7.93  | 7.43  | 7.42  | 7.31  | 7.15  | 6.95  | 7.01  | 1.34                  |
| 10              | 228370_at      | BF114870  | SNRPN          | 0.018806               | 8.78  | 8.98  | 8.64  | 8.22  | 8.24  | 8.86  | 8.62  | 8.52  | 9.24  | 7.40  | 7.79  | 7.42  | 6.86  | 6.65  | 7.07  | 6.08  | 6.26  | 6.73  | 1.45                  |
| 10              | 204301_at      | NM_014867 | KBTBD11        | 0.023308               | 7.42  | 7.32  | 7.36  | 7.36  | 7.26  | 7.61  | 7.24  | 7.22  | 7.40  | 6.99  | 7.03  | 6.98  | 6.70  | 6.50  | 6.67  | 6.73  | 6.66  | 6.64  | 1.43                  |
| 10              | 226085_at      | AA181060  | CBX5           | 0.029627               | 11.39 | 11.41 | 11.26 | 11.28 | 10.75 | 11.46 | 10.99 | 10.87 | 11.41 | 10.68 | 10.41 | 10.69 | 9.47  | 9.28  | 9.62  | 9.83  | 10.07 | 9.77  | 1.49                  |
| 10              | 202641_at      | NM_004311 | ARL3           | 0.001363               | 9.16  | 9.45  | 9.33  | 9.46  | 9.21  | 9.69  | 9.24  | 8.99  | 9.46  | 8.81  | 8.58  | 9.00  | 7.58  | 7.27  | 7.59  | 7.78  | 7.66  | 7.54  | 0.87                  |
| 10              | 225908_at      | AI829927  | LOC285148      | 0.018416               | 10.53 | 10.70 | 10.67 | 10.68 | 10.74 | 11.09 | 10.59 | 10.48 | 10.98 | 10.41 | 10.21 | 10.46 | 9.34  | 9.32  | 9.74  | 9.21  | 9.41  | 9.21  | 0.77                  |
| 10              | 1554093_a_at   | BC014315  | SNAPC5         | 0.019827               | 9.87  | 10.16 | 10.25 | 10.10 | 10.00 | 10.42 | 9.89  | 9.90  | 10.19 | 9.79  | 9.73  | 9.87  | 8.98  | 9.06  | 9.16  | 9.00  | 9.04  | 8.88  | 0.87                  |
| 10              | 212686_at      | AB032983  | PPM1H          | 0.000309               | 7.12  | 7.52  | 7.55  | 7.23  | 7.41  | 7.49  | 7.44  | 7.47  | 7.54  | 7.00  | 6.98  | 7.05  | 6.20  | 6.11  | 5.97  | 6.13  | 6.04  | 6.14  | 0.92                  |
| 10              | 203799_at      | NM_014880 | CD302          | 0.000194               | 7.36  | 7.79  | 7.62  | 7.42  | 7.62  | 7.90  | 7.87  | 7.83  | 8.54  | 7.37  | 7.29  | 7.30  | 5.61  | 5.70  | 5.54  | 5.46  | 5.43  | 5.39  | 1.04                  |
| 10              | 203608_at      | AL031230  | ALDH5A1        | 0.002281               | 7.59  | 8.22  | 7.91  | 7.63  | 7.69  | 8.16  | 7.71  | 7.76  | 8.59  | 7.15  | 7.11  | 7.27  | 5.25  | 5.18  | 5.52  | 5.52  | 4.96  | 5.34  | 0.78                  |
| 10              | 1553954_at     | BU682208  | ALG14          | 0.032068               | 7.42  | 7.45  | 7.43  | 7.32  | 7.23  | 7.92  | 7.62  | 7.34  | 8.25  | 6.81  | 6.75  | 7.12  | 5.58  | 5.55  | 5.76  | 5.33  | 5.74  | 5.80  | 1.05                  |
| 10              | 227202_at      | AW072790  | ---            | 0.001421               | 7.16  | 7.74  | 7.46  | 7.90  | 7.57  | 8.63  | 7.70  | 7.70  | 8.81  | 6.67  | 6.22  | 7.06  | 4.21  | 4.14  | 4.45  | 4.06  | 4.14  | 3.97  | 0.83                  |
| 10              | 224901_at      | AL571375  | SCD5           | 0.000012               | 8.68  | 8.79  | 8.88  | 8.74  | 8.73  | 9.05  | 9.17  | 9.09  | 9.68  | 8.15  | 8.07  | 8.12  | 6.93  | 6.66  | 6.93  | 6.55  | 6.37  | 6.49  | 1.00                  |
| 10              | 205022_s_at    | NM_005197 | CHES1          | 0.000335               | 8.22  | 8.24  | 8.20  | 8.35  | 8.32  | 8.27  | 8.37  | 8.30  | 8.48  | 7.73  | 7.68  | 7.42  | 6.74  | 6.71  | 6.91  | 6.21  | 6.48  | 6.44  | 1.09                  |
| 10              | 217286_s_at    | BC001805  | NDRG3          | 0.000025               | 9.34  | 9.43  | 9.41  | 9.51  | 9.50  | 9.61  | 9.35  | 9.36  | 9.53  | 9.02  | 8.90  | 8.99  | 8.39  | 8.44  | 8.64  | 8.34  | 8.23  | 8.19  | 0.88                  |
| 10              | 218031_s_at    | NM_018589 | CHES1          | 0.001375               | 7.25  | 7.81  | 7.32  | 7.88  | 7.38  | 7.97  | 7.71  | 7.60  | 8.02  | 6.89  | 6.37  | 6.68  | 5.63  | 5.27  | 5.71  | 5.36  | 5.33  | 5.23  | 1.01                  |
| 10              | 219104_at      | NM_016422 | RNF141         | 0.037203               | 7.56  | 7.80  | 7.98  | 7.71  | 7.86  | 7.85  | 7.95  | 7.59  | 7.96  | 7.55  | 7.32  | 7.49  | 6.78  | 6.86  | 6.95  | 6.76  | 6.85  | 6.85  | 0.95                  |
| 10              | 223037_at      | AF151061  | PDZK11         | 0.006803               | 10.36 | 10.46 | 10.47 | 10.59 | 10.45 | 10.78 | 10.26 | 10.20 | 10.49 | 10.08 | 9.95  | 10.18 | 9.22  | 9.22  | 9.59  | 8.78  | 8.99  | 9.24  | 0.76                  |
| 10              | 218018_at      | AW449022  | PDXK           | 0.030756               | 9.64  | 9.67  | 9.67  | 10.05 | 9.74  | 10.13 | 9.46  | 9.50  | 9.73  | 9.37  | 9.29  | 9.18  | 8.27  | 8.00  | 8.70  | 7.50  | 7.51  | 8.26  | 1.06                  |
| 10              | 225944_at      | AW006938  | NLN            | 0.003933               | 9.33  | 9.58  | 9.58  | 9.97  | 9.83  | 10.18 | 9.17  | 9.31  | 9.76  | 9.11  | 8.92  | 9.19  | 7.84  | 7.73  | 8.09  | 6.91  | 6.77  | 7.67  | 1.00                  |
| 10              | 201193_at      | NM_005896 | IDH1           | 0.008514               | 11.76 | 11.96 | 11.92 | 12.17 | 12.29 | 12.33 | 11.84 | 11.85 | 12.23 | 11.63 | 11.70 | 11.94 | 10.77 | 10.69 | 11.03 | 10.54 | 10.44 | 10.89 | 0.84                  |
| 10              | 218557_at      | NM_020202 | NIT2           | 0.045526               | 10.10 | 10.26 | 10.26 | 10.57 | 10.51 | 10.71 | 10.13 | 10.10 | 10.44 | 10.05 | 9.90  | 10.08 | 8.85  | 8.78  | 9.31  | 8.47  | 8.53  | 9.21  | 0.90                  |
| 10              | 223272_s_at    | BC005102  | C1orf57        | 0.000722               | 8.99  | 9.10  | 9.17  | 9.61  | 9.50  | 9.77  | 9.16  | 9.09  | 9.38  | 8.89  | 8.74  | 8.93  | 7.26  | 6.95  | 7.60  | 6.83  | 6.77  | 7.47  | 0.70                  |
| 10              | 218281_at      | NM_016055 | MRPL48         | 0.012461               | 8.93  | 8.86  | 8.90  | 9.94  | 9.04  | 9.24  | 8.90  | 8.83  | 9.12  | 8.74  | 8.66  | 8.64  | 7.79  | 7.68  | 8.13  | 7.53  | 7.64  | 7.95  | 0.75                  |
| 10              | 209366_x_at    | M22865    | CYB5           | 0.005891               | 9.87  | 10.06 | 10.10 | 10.26 | 10.09 | 10.33 | 9.99  | 9.81  | 10.10 | 9.69  | 9.54  | 9.73  | 8.79  | 8.72  | 9.18  | 8.72  | 8.78  | 8.95  | 0.65                  |
| 10              | 203814_s_at    | NM_000904 | NQO2           | 0.010054               | 9.55  | 9.67  | 9.70  | 10.13 | 9.65  | 9.92  | 9.76  | 9.41  | 9.79  | 9.17  | 9.12  | 9.35  | 8.25  | 8.10  | 8.62  | 8.15  | 8.20  | 8.42  | 0.78                  |
| 10              | 203606_at      | NM_004553 | NDUFS6         | 0.004825               | 9.94  | 10.20 | 10.01 | 10.30 | 9.97  | 10.15 | 9.96  | 9.80  | 10.17 | 9.65  | 9.55  | 9.84  | 8.60  | 8.38  | 8.88  | 8.45  | 8.38  | 8.66  | 0.52                  |
| 10              | 203259_s_at    | BC001671  | HDDC2          | 0.019142               | 10.24 |       |       |       |       |       |       |       |       |       |       |       |       |       |       |       |       |       |                       |

| K-Mean<br>Order | Probe<br>Names | GBiD      | Gene<br>Symbol    | Adj. p-Value<br>≤0.05, |       |       |       |       |       |       |       |       |       |       |       |       |       |       |       |       |       |       | K-Means<br>Similarity |
|-----------------|----------------|-----------|-------------------|------------------------|-------|-------|-------|-------|-------|-------|-------|-------|-------|-------|-------|-------|-------|-------|-------|-------|-------|-------|-----------------------|
|                 |                |           |                   | Bonferroni             | c1    | c2    | c3    | 6h1   | 6h2   | 6h3   | 12h1  | 12h2  | 12h3  | 24h1  | 24h2  | 24h3  | 48h1  | 48h2  | 48h3  | 72h1  | 72h2  | 72h3  |                       |
| 10              | 227158_at      | AU149257  | C14orf126         | 0.028451               | 8.08  | 7.94  | 7.95  | 8.23  | 8.00  | 8.65  | 7.94  | 7.77  | 8.39  | 7.37  | 7.39  | 7.21  | 5.93  | 5.67  | 6.35  | 5.91  | 6.06  | 6.67  | 1.09                  |
| 10              | 223808_s_at    | AF277187  | PTPMT1            | 0.045311               | 8.34  | 8.51  | 8.32  | 8.48  | 8.41  | 8.76  | 8.61  | 8.36  | 8.79  | 8.24  | 7.99  | 8.19  | 7.09  | 7.11  | 7.44  | 7.10  | 7.14  | 7.58  | 0.94                  |
| 10              | 218160_at      | NM_014222 | NDUFA8            | 0.011478               | 9.64  | 9.76  | 9.70  | 10.09 | 10.01 | 10.25 | 9.80  | 9.63  | 9.98  | 9.54  | 9.30  | 9.51  | 8.12  | 8.26  | 8.80  | 8.36  | 8.38  | 8.68  | 0.94                  |
| 10              | 218654_s_at    | NM_016071 | MRPS33            | 0.001246               | 10.35 | 10.44 | 10.34 | 10.54 | 10.57 | 10.83 | 10.53 | 10.37 | 10.65 | 10.26 | 10.07 | 10.19 | 9.14  | 9.14  | 9.43  | 9.29  | 9.45  | 9.55  | 1.00                  |
| 10              | 223003_at      | AF061732  | MGC2803           | 0.002428               | 10.69 | 10.84 | 10.80 | 10.68 | 10.71 | 10.82 | 10.74 | 10.71 | 10.97 | 10.49 | 10.51 | 10.53 | 9.76  | 9.79  | 10.00 | 9.76  | 9.99  | 9.98  | 0.79                  |
| 10              | 1555790_a_at   | BC036301  | ZFPL /// FLJ38482 | 0.003638               | 9.37  | 9.56  | 9.68  | 9.50  | 9.53  | 9.53  | 9.65  | 9.33  | 9.77  | 9.26  | 9.05  | 9.07  | 7.87  | 7.70  | 8.29  | 7.82  | 7.90  | 8.17  | 0.65                  |
| 10              | 224332_s_at    | AB049656  | MRPL43            | 0.006431               | 9.45  | 9.43  | 9.40  | 9.43  | 9.43  | 9.45  | 9.53  | 9.32  | 9.56  | 9.18  | 8.89  | 9.20  | 8.21  | 8.17  | 8.54  | 8.01  | 8.38  | 8.34  | 0.75                  |
| 10              | 213357_at      | AV701318  | GTF2H5            | 0.026142               | 8.94  | 9.17  | 9.00  | 9.29  | 9.12  | 9.36  | 8.91  | 8.78  | 9.20  | 8.58  | 8.35  | 8.79  | 6.88  | 6.67  | 7.47  | 6.76  | 7.04  | 7.65  | 0.76                  |
| 10              | 201725_at      | NM_006023 | C10orf7           | 0.037601               | 9.61  | 9.82  | 9.82  | 9.76  | 9.67  | 9.72  | 9.61  | 9.59  | 9.80  | 9.38  | 9.26  | 9.63  | 8.29  | 8.13  | 8.68  | 8.15  | 8.40  | 8.73  | 0.73                  |
| 10              | 200818_at      | NM_001697 | ATP5O             | 0.031428               | 10.48 | 10.61 | 10.59 | 10.79 | 10.63 | 11.08 | 10.75 | 10.49 | 10.90 | 10.41 | 10.26 | 10.54 | 9.08  | 9.04  | 9.64  | 8.97  | 9.29  | 9.40  | 0.80                  |
| 10              | 223244_s_at    | AF217092  | NDUFA12           | 0.003237               | 10.99 | 11.03 | 11.12 | 11.18 | 10.94 | 11.28 | 10.98 | 10.94 | 11.17 | 10.78 | 10.67 | 10.84 | 9.49  | 9.48  | 10.05 | 9.65  | 9.74  | 9.65  | 0.68                  |
| 10              | 225000_at      | BF246131  | PRKAR2A           | 0.035504               | 11.09 | 11.12 | 10.82 | 10.50 | 11.05 | 11.48 | 10.88 | 10.59 | 11.35 | 10.37 | 10.15 | 10.17 | 8.83  | 8.83  | 9.39  | 8.54  | 8.90  | 8.80  | 0.99                  |
| 10              | 218477_at      | NM_014051 | TMEM14A           | 0.016750               | 9.77  | 9.92  | 9.82  | 9.67  | 9.59  | 10.12 | 9.40  | 9.31  | 10.01 | 9.02  | 8.83  | 9.11  | 7.41  | 7.46  | 8.04  | 7.25  | 7.59  | 7.98  | 0.76                  |
| 10              | 222403_at      | AV756532  | MTCH2             | 0.020945               | 8.21  | 8.38  | 8.18  | 7.92  | 7.90  | 8.49  | 7.98  | 7.87  | 8.39  | 7.38  | 7.27  | 7.63  | 6.25  | 6.52  | 6.57  | 6.02  | 6.06  | 6.64  | 0.95                  |
| 10              | 203371_s_at    | NM_002491 | NDUFB3            | 0.002891               | 9.72  | 9.90  | 9.91  | 9.78  | 9.69  | 9.95  | 9.78  | 9.67  | 10.01 | 9.29  | 9.47  | 9.61  | 8.75  | 8.80  | 8.82  | 8.33  | 8.41  | 8.69  | 0.77                  |
| 10              | 227830_at      | AI478781  | GABRB3 /// DDX1   | 0.013379               | 9.64  | 9.94  | 9.95  | 9.59  | 9.66  | 10.13 | 9.66  | 9.66  | 10.16 | 9.15  | 9.08  | 9.30  | 7.99  | 8.01  | 8.13  | 7.42  | 7.53  | 8.23  | 0.76                  |
| 10              | 218888_s_at    | NM_018092 | NETO2             | 0.011246               | 9.93  | 10.18 | 10.27 | 10.21 | 10.12 | 10.42 | 10.04 | 10.10 | 10.62 | 9.57  | 9.59  | 9.73  | 8.53  | 7.98  | 8.71  | 7.75  | 7.80  | 8.39  | 0.66                  |
| 10              | 208873_s_at    | BC000232  | C5orf18           | 0.008108               | 9.89  | 10.13 | 10.04 | 10.04 | 9.80  | 10.34 | 9.83  | 9.64  | 10.21 | 9.19  | 9.17  | 9.54  | 7.99  | 7.68  | 8.29  | 7.38  | 7.34  | 8.08  | 0.59                  |
| 10              | 211761_s_at    | BC005975  | CACYBP            | 0.017094               | 9.91  | 10.09 | 10.09 | 10.18 | 9.93  | 10.55 | 10.01 | 9.87  | 10.43 | 9.79  | 9.42  | 9.74  | 8.54  | 8.50  | 8.72  | 8.11  | 8.04  | 8.58  | 0.76                  |
| 10              | 200761_s_at    | NM_006407 | ARL6IP5           | 0.006079               | 10.66 | 10.67 | 10.73 | 10.55 | 10.48 | 11.00 | 10.67 | 10.51 | 11.13 | 9.98  | 9.94  | 9.86  | 8.35  | 8.27  | 8.97  | 7.91  | 8.06  | 8.71  | 0.71                  |
| 10              | 205190_at      | NM_002670 | PLS1              | 0.035962               | 9.77  | 9.87  | 9.79  | 9.77  | 9.54  | 10.16 | 9.68  | 9.68  | 10.28 | 9.08  | 8.87  | 8.95  | 7.72  | 7.71  | 8.44  | 6.95  | 7.16  | 7.87  | 0.97                  |
| 10              | 228821_at      | AW004016  | ST6GAL2           | 0.034226               | 7.58  | 8.01  | 7.55  | 7.28  | 7.00  | 7.73  | 7.42  | 7.23  | 8.41  | 6.52  | 5.89  | 6.73  | 4.85  | 4.69  | 5.46  | 4.53  | 4.51  | 4.83  | 1.04                  |
| 10              | 212830_at      | W68084    | EGFL5             | 0.001994               | 9.20  | 9.62  | 9.56  | 9.34  | 9.34  | 9.53  | 9.34  | 9.35  | 9.86  | 8.63  | 8.64  | 8.75  | 7.73  | 7.66  | 8.11  | 7.22  | 7.55  | 7.59  | 0.81                  |
| 10              | 218862_at      | NM_024701 | ASB13             | 0.011723               | 9.09  | 9.30  | 9.36  | 9.17  | 9.26  | 9.08  | 9.11  | 9.31  | 9.35  | 9.01  | 8.85  | 8.95  | 8.21  | 8.25  | 8.42  | 8.12  | 8.00  | 8.39  | 0.85                  |
| 10              | 201674_s_at    | BC000729  | AKAP1             | 0.005038               | 10.13 | 10.40 | 10.18 | 10.25 | 10.27 | 10.09 | 9.97  | 10.07 | 10.40 | 9.72  | 9.85  | 9.56  | 8.68  | 8.60  | 9.12  | 8.54  | 8.32  | 8.71  | 0.78                  |
| 10              | 226610_at      | AA722878  | PRR6              | 0.001920               | 9.32  | 9.52  | 9.47  | 9.58  | 9.33  | 9.36  | 9.31  | 9.20  | 9.57  | 9.04  | 8.95  | 9.28  | 7.68  | 7.57  | 7.97  | 7.29  | 7.23  | 7.87  | 0.58                  |
| 10              | 202950_at      | NM_001889 | CRYZ              | 0.019880               | 10.44 | 10.63 | 10.50 | 10.26 | 10.06 | 10.61 | 10.29 | 9.95  | 10.44 | 9.71  | 9.57  | 9.96  | 7.32  | 7.30  | 8.32  | 6.81  | 7.06  | 8.08  | 0.72                  |
| 10              | 201528_at      | BG398414  | RPA1              | 0.006289               | 9.43  | 9.81  | 9.83  | 9.35  | 9.10  | 9.54  | 9.23  | 9.35  | 9.69  | 8.86  | 8.92  | 9.09  | 7.10  | 7.07  | 7.62  | 6.64  | 6.61  | 7.56  | 0.75                  |
| 10              | 209123_at      | BC000576  | QDPR              | 0.004535               | 9.04  | 9.49  | 9.47  | 9.40  | 9.30  | 9.27  | 9.19  | 9.27  | 9.22  | 8.92  | 8.79  | 8.97  | 8.00  | 7.93  | 8.11  | 7.68  | 7.64  | 8.16  | 0.66                  |
| 10              | 222400_s_at    | BC001467  | MTCBP-1           | 0.003398               | 10.38 | 10.68 | 10.67 | 10.51 | 10.36 | 10.52 | 10.52 | 10.34 | 10.42 | 10.15 | 9.98  | 10.26 | 9.45  | 9.34  | 9.40  | 9.13  | 9.19  | 9.53  | 0.76                  |
| 10              | 212509_s_at    | BF968134  | MXRA7             | 0.001861               | 10.68 | 11.00 | 11.04 | 10.84 | 10.67 | 10.92 | 10.60 | 10.64 | 10.93 | 10.34 | 10.37 | 10.40 | 9.32  | 9.25  | 9.53  | 9.19  | 9.14  | 9.57  | 0.57                  |
| 10              | 208091_s_at    | NM_030796 | ECOP              | 0.013886               | 9.72  | 10.13 | 10.06 | 9.92  | 9.82  | 10.08 | 9.71  | 9.77  | 9.99  | 9.31  | 9.35  | 9.56  | 8.19  | 7.89  | 8.40  | 7.87  | 7.81  | 8.58  | 0.62                  |
| 10              | 213093_at      | AI471375  | PRKCA             | 0.005000               | 10.07 | 10.49 | 10.42 | 10.24 | 10.16 | 10.35 | 10.11 | 10.11 | 10.56 | 9.66  | 9.68  | 9.83  | 8.41  | 8.27  | 8.58  | 8.18  | 8.16  | 8.86  | 0.61                  |
| 10              | 212256_s_at    | BE906572  | GALNT10           | 0.009770               | 9.80  | 10.20 | 10.25 | 9.97  | 9.92  | 9.92  | 9.69  | 9.75  | 9.92  | 9.34  | 9.28  | 9.53  | 8.45  | 8.29  | 8.68  | 8.19  | 8.15  | 8.74  | 0.77                  |
| 10              | 204366_s_at    | NM_001521 | GTF3C2            | 0.028179               | 10.47 | 10.73 | 10.79 | 10.73 | 10.79 | 10.69 | 10.55 | 10.62 | 10.70 | 10.35 | 10.24 | 10.38 | 9.74  | 9.70  | 10.06 | 9.77  | 9.74  | 9.91  | 0.81                  |
| 10              | 210609_s_at    | BC000474  | TP5313            | 0.001429               | 9.96  | 10.29 | 10.39 | 10.23 | 10.22 | 10.16 | 10.02 | 10.04 | 10.20 | 9.68  | 9.66  | 9.82  | 8.64  | 8.53  | 8.99  | 8.64  | 8.70  | 8.94  | 0.56                  |
| 10              | 203245_s_at    | BC002791  | FLJ35348          | 0.009070               | 7.16  | 7.72  | 7.57  | 7.54  | 7.72  | 7.62  | 7.20  | 7.48  | 7.68  | 6.92  | 6.79  | 7.02  | 5.77  | 5.68  | 6.12  | 5.44  | 5.55  | 6.02  | 0.60                  |
| 10              | 211378_x_at    | BC001224  | PPIA              | 0.010417               | 13.16 | 13.33 | 13.40 | 13.29 | 13.22 | 13.31 | 13.08 | 13.07 | 13.15 | 12.91 | 12.90 | 13.16 | 12.07 | 12.02 | 12.46 | 11.95 | 11.96 | 12.26 | 0.65                  |
| 10              | 211765_x_at    | BC005982  | PPIA              | 0.006334               | 13.13 | 13.34 | 13.39 | 13.30 | 13.19 | 13.32 | 13.09 | 13.06 | 13.13 | 12.89 | 12.88 | 13.13 | 12.13 | 12.04 | 12.45 | 11.95 | 11.94 | 12.23 | 0.63                  |
| 10              | 201293_x_at    | NM_021130 | PPIA              | 0.007453               | 13.17 | 13.39 | 13.37 | 13.33 | 13.25 | 13.37 | 13.12 | 13.12 | 13.17 | 12.92 | 12.88 | 13.18 | 12.08 | 12.05 | 12.46 | 12.02 | 12.00 | 12.29 | 0.60                  |
| 10              | 211978_x_at    | AI708767  | PPIA              | 0.005877               | 13.16 | 13.34 | 13.39 | 13.31 | 13.21 | 13.29 | 13.08 | 13.09 | 13.11 | 12.92 | 12.87 | 13.11 | 12.09 | 12.05 | 12.45 | 12.01 | 12.03 | 12.30 | 0.65                  |
| 10              |                |           |                   |                        |       |       |       |       |       |       |       |       |       |       |       |       |       |       |       |       |       |       |                       |

| K-Mean<br>Order | Probe<br>Names | Gene<br>Symbol | Adj. p-Value<br><=0.05,<br>Bonferroni |          |       |       |       |       |       |       |       |       |       |       |       |       |       |       |       |       |       | K-Means<br>Similarity |      |
|-----------------|----------------|----------------|---------------------------------------|----------|-------|-------|-------|-------|-------|-------|-------|-------|-------|-------|-------|-------|-------|-------|-------|-------|-------|-----------------------|------|
|                 |                |                |                                       | c1       | c2    | c3    | 6h1   | 6h2   | 6h3   | 12h1  | 12h2  | 12h3  | 24h1  | 24h2  | 24h3  | 48h1  | 48h2  | 48h3  | 72h1  | 72h2  | 72h3  |                       |      |
| 10              | 201200_at      | NM_003851      | CREG1                                 | 0.003460 | 10.94 | 11.39 | 11.28 | 11.48 | 11.67 | 11.91 | 11.65 | 11.52 | 12.05 | 11.21 | 11.19 | 11.36 | 9.63  | 9.32  | 10.08 | 9.15  | 9.15  | 9.57                  | 0.94 |
| 10              | 203974_at      | NM_012080      | HDHD1A                                | 0.032205 | 9.10  | 9.43  | 9.37  | 9.38  | 9.27  | 9.38  | 9.46  | 9.46  | 9.76  | 9.20  | 9.22  | 9.29  | 8.16  | 8.10  | 8.58  | 8.06  | 8.02  | 8.43                  | 1.00 |
| 10              | 121334_at      | BE880245       | GNS                                   | 0.035350 | 9.84  | 10.02 | 10.10 | 10.14 | 10.13 | 10.10 | 10.12 | 10.20 | 10.52 | 9.96  | 10.01 | 9.87  | 8.94  | 8.70  | 9.28  | 8.80  | 8.72  | 9.12                  | 1.05 |
| 10              | 225029_at      | BE621082       | LOC550643                             | 0.001362 | 10.65 | 10.76 | 10.77 | 10.70 | 10.80 | 10.73 | 10.66 | 10.73 | 10.97 | 10.59 | 10.57 | 10.53 | 9.79  | 9.78  | 10.07 | 9.76  | 9.58  | 9.72                  | 0.77 |
| 10              | 204319_s_at    | NM_002925      | RGSI10                                | 0.012122 | 8.64  | 8.91  | 8.75  | 8.62  | 8.84  | 8.94  | 8.64  | 8.64  | 9.17  | 8.69  | 8.56  | 8.66  | 7.56  | 7.38  | 7.81  | 7.26  | 7.19  | 7.47                  | 0.85 |
| 10              | 221974_at      | AW770748       | SNRPN                                 | 0.018907 | 8.29  | 8.50  | 8.32  | 8.46  | 8.16  | 8.94  | 8.28  | 8.28  | 9.25  | 7.76  | 7.85  | 7.84  | 5.87  | 5.55  | 6.56  | 5.67  | 5.54  | 6.01                  | 0.75 |
| 10              | 203196_at      | AI948503       | ABCC4                                 | 0.042370 | 9.54  | 9.83  | 9.80  | 9.43  | 9.35  | 10.16 | 9.46  | 9.44  | 10.13 | 9.28  | 9.16  | 9.33  | 7.24  | 6.96  | 7.98  | 7.06  | 6.72  | 7.50                  | 0.80 |
| 10              | 211727_s_at    | BC005895       | COX11                                 | 0.038148 | 11.04 | 11.30 | 11.35 | 10.96 | 10.74 | 11.52 | 11.04 | 10.81 | 11.68 | 10.74 | 10.67 | 10.94 | 8.88  | 8.80  | 9.67  | 8.45  | 8.24  | 8.90                  | 0.88 |
| 10              | 224937_at      | BF311866       | PTGFRN                                | 0.009040 | 8.93  | 8.97  | 8.86  | 9.04  | 9.01  | 9.20  | 8.90  | 9.05  | 9.50  | 8.66  | 8.60  | 8.67  | 6.94  | 6.91  | 7.57  | 6.41  | 6.06  | 7.09                  | 0.91 |
| 10              | 204839_at      | NM_015918      | POP5                                  | 0.033413 | 9.51  | 9.91  | 9.62  | 9.62  | 9.80  | 9.91  | 9.69  | 9.64  | 9.96  | 9.40  | 9.25  | 9.45  | 8.03  | 7.77  | 8.41  | 7.55  | 7.31  | 8.26                  | 0.78 |
| 10              | 202053_s_at    | L47162         | ALDH3A2                               | 0.027798 | 10.92 | 11.32 | 11.29 | 11.08 | 11.26 | 11.40 | 11.01 | 11.07 | 11.22 | 10.82 | 10.65 | 10.87 | 9.51  | 9.65  | 9.92  | 9.38  | 9.13  | 9.95                  | 0.73 |
| 10              | 210825_s_at    | AF130103       | PBP                                   | 0.008815 | 11.08 | 11.20 | 11.12 | 11.09 | 10.93 | 11.23 | 11.07 | 10.86 | 11.24 | 10.71 | 10.66 | 10.77 | 9.26  | 8.78  | 9.98  | 8.72  | 8.55  | 8.86                  | 0.86 |
| 10              | 225274_at      | BF247054       | PCYOX1                                | 0.000015 | 10.19 | 10.33 | 10.35 | 10.03 | 10.22 | 10.28 | 10.34 | 10.35 | 10.90 | 9.47  | 9.45  | 9.52  | 7.31  | 7.00  | 7.73  | 6.62  | 6.74  | 7.20                  | 0.59 |
| 10              | 200839_s_at    | NM_001908      | CTSB                                  | 0.001988 | 10.86 | 11.07 | 11.10 | 11.06 | 11.10 | 11.06 | 11.26 | 11.13 | 11.38 | 10.73 | 10.82 | 10.85 | 9.82  | 9.57  | 10.10 | 9.66  | 9.43  | 9.85                  | 0.77 |
| 10              | 224946_s_at    | AL571677       | MGC12981                              | 0.000189 | 8.63  | 9.04  | 9.10  | 8.73  | 8.77  | 8.58  | 8.93  | 8.85  | 8.89  | 8.57  | 8.44  | 8.62  | 7.44  | 7.30  | 7.47  | 7.15  | 7.17  | 7.44                  | 0.82 |
| 10              | 221726_at      | BE250348       | RPL22                                 | 0.000006 | 10.77 | 11.01 | 11.08 | 10.68 | 10.67 | 10.82 | 10.87 | 10.70 | 11.05 | 10.29 | 10.34 | 10.52 | 8.88  | 8.75  | 9.05  | 8.34  | 8.17  | 8.60                  | 0.65 |
| 10              | 227209_at      | AI091445       | ---                                   | 0.000256 | 9.57  | 10.17 | 10.17 | 9.69  | 9.58  | 10.11 | 9.73  | 9.73  | 10.43 | 8.88  | 8.87  | 9.52  | 6.48  | 6.43  | 7.04  | 6.40  | 6.18  | 6.45                  | 0.51 |
| 10              | 225579_at      | AL516202       | PQLC3                                 | 0.000953 | 9.13  | 9.63  | 9.74  | 9.14  | 9.16  | 9.51  | 9.29  | 9.20  | 9.86  | 8.86  | 8.71  | 9.19  | 6.80  | 6.62  | 7.34  | 6.45  | 6.18  | 6.64                  | 0.64 |
| 10              | 225716_at      | AI357639       | BRI3BP                                | 0.001039 | 9.83  | 10.10 | 10.22 | 9.26  | 8.84  | 9.57  | 9.56  | 9.45  | 10.36 | 8.71  | 8.56  | 8.98  | 6.49  | 6.48  | 7.13  | 5.83  | 6.05  | 6.61                  | 0.92 |
| 10              | 223892_s_at    | AF182414       | TMBIM4                                | 0.039817 | 9.95  | 10.26 | 10.20 | 9.94  | 9.87  | 10.20 | 10.23 | 9.91  | 10.39 | 9.84  | 9.81  | 9.88  | 9.03  | 8.90  | 9.29  | 8.63  | 8.76  | 8.98                  | 0.92 |
| 10              | 219304_s_at    | NM_025208      | PDGFD                                 | 0.041538 | 8.87  | 9.06  | 9.04  | 8.55  | 8.84  | 9.03  | 8.80  | 8.90  | 9.22  | 8.45  | 8.37  | 8.56  | 6.87  | 6.51  | 7.62  | 6.15  | 6.55  | 7.01                  | 0.85 |
| 10              | 222404_x_at    | AI984229       | HSPC121                               | 0.042471 | 11.82 | 12.12 | 11.87 | 11.55 | 11.41 | 11.89 | 11.59 | 11.45 | 12.08 | 11.25 | 11.13 | 11.56 | 9.71  | 9.55  | 10.47 | 9.19  | 9.65  | 9.77                  | 0.85 |
| 10              | 218233_s_at    | NM_017601      | C6orf49                               | 0.028338 | 11.19 | 11.35 | 11.31 | 11.11 | 11.16 | 11.22 | 11.13 | 11.11 | 11.28 | 10.92 | 10.84 | 11.07 | 10.09 | 9.99  | 10.48 | 9.91  | 10.27 | 10.24                 | 0.78 |
| 10              | 209009_at      | BC001169       | ESD                                   | 0.004722 | 10.68 | 11.07 | 10.91 | 10.90 | 10.81 | 10.95 | 10.87 | 10.67 | 11.01 | 10.74 | 10.51 | 10.90 | 9.36  | 9.32  | 9.78  | 9.10  | 9.49  | 9.20                  | 0.79 |
| 10              | 217773_s_at    | NM_002489      | NDUFA4                                | 0.001897 | 10.85 | 11.09 | 10.89 | 11.01 | 10.86 | 11.10 | 10.98 | 10.72 | 10.86 | 10.68 | 10.55 | 10.78 | 9.42  | 9.40  | 9.93  | 9.44  | 9.49  | 9.29                  | 0.74 |
| 10              | 223411_at      | AF225422       | AD023                                 | 0.000037 | 10.04 | 9.99  | 9.96  | 10.34 | 10.10 | 10.13 | 10.15 | 10.01 | 10.25 | 9.81  | 9.81  | 9.73  | 8.68  | 8.46  | 8.86  | 8.42  | 8.55  | 8.67                  | 0.66 |
| 10              | 217963_s_at    | NM_014380      | NGFRAP1                               | 0.000117 | 11.95 | 12.06 | 12.09 | 12.17 | 12.05 | 12.21 | 12.14 | 12.03 | 12.33 | 11.83 | 11.90 | 11.86 | 10.49 | 10.22 | 10.83 | 10.01 | 10.17 | 10.35                 | 0.65 |
| 10              | 209194_at      | BC005334       | CETN2                                 | 0.002202 | 9.21  | 9.42  | 9.05  | 9.38  | 9.40  | 9.76  | 9.31  | 9.18  | 9.67  | 9.15  | 9.08  | 9.15  | 7.49  | 7.24  | 7.90  | 6.66  | 7.13  | 7.31                  | 0.85 |
| 10              | 208826_x_at    | U27143         | HINT1                                 | 0.001258 | 11.88 | 12.22 | 12.25 | 12.12 | 12.12 | 12.30 | 12.02 | 12.03 | 12.31 | 11.89 | 11.89 | 12.07 | 10.90 | 10.80 | 11.20 | 10.59 | 10.66 | 10.49                 | 0.79 |
| 10              | 207721_x_at    | NM_005340      | HINT1                                 | 0.000384 | 11.67 | 11.94 | 12.04 | 11.83 | 12.00 | 12.05 | 11.83 | 11.84 | 12.03 | 11.66 | 11.69 | 11.80 | 10.69 | 10.58 | 10.96 | 10.34 | 10.49 | 10.34                 | 0.75 |
| 10              | 224918_x_at    | AI220117       | MGST1                                 | 0.001703 | 12.52 | 12.73 | 12.75 | 12.62 | 12.75 | 12.85 | 12.66 | 12.54 | 12.81 | 12.38 | 12.38 | 12.54 | 11.36 | 11.34 | 11.90 | 11.01 | 11.09 | 11.07                 | 0.79 |
| 10              | 231736_x_at    | NM_020300      | MGST1                                 | 0.000268 | 12.43 | 12.83 | 12.79 | 12.63 | 12.75 | 12.82 | 12.70 | 12.49 | 12.66 | 12.38 | 12.30 | 12.67 | 11.02 | 11.07 | 11.51 | 10.62 | 10.57 | 10.68                 | 0.80 |
| 10              | 201619_at      | NM_006793      | PRDX3                                 | 0.001621 | 11.35 | 11.47 | 11.57 | 11.31 | 11.29 | 11.61 | 11.24 | 11.18 | 11.49 | 11.10 | 11.01 | 11.16 | 10.05 | 10.04 | 10.59 | 9.52  | 9.66  | 9.48                  | 1.06 |
| 10              | 213423_x_at    | AI884858       | TUSC3                                 | 0.016622 | 9.07  | 9.49  | 9.49  | 9.41  | 9.52  | 9.86  | 9.35  | 9.37  | 9.86  | 9.12  | 9.05  | 9.28  | 7.63  | 7.56  | 8.23  | 7.03  | 7.32  | 7.63                  | 0.75 |
| 10              | 212145_at      | D87453         | MRPS27                                | 0.011989 | 10.27 | 10.57 | 10.60 | 10.45 | 10.61 | 10.71 | 10.36 | 10.36 | 10.83 | 10.20 | 10.17 | 10.34 | 9.11  | 9.15  | 9.45  | 8.80  | 9.04  | 9.23                  | 0.60 |
| 10              | 224928_at      | AK024846       | SET7                                  | 0.005073 | 9.99  | 10.30 | 10.36 | 10.07 | 10.17 | 10.40 | 10.09 | 10.17 | 10.59 | 9.94  | 9.84  | 10.08 | 8.82  | 8.74  | 9.07  | 8.21  | 8.46  | 8.68                  | 0.75 |
| 10              | 208910_s_at    | L04636         | C1QBP                                 | 0.049269 | 10.50 | 11.10 | 11.06 | 11.12 | 11.01 | 11.62 | 10.85 | 10.71 | 11.33 | 10.54 | 10.49 | 10.98 | 9.02  | 8.93  | 9.69  | 8.50  | 8.68  | 8.97                  | 0.80 |
| 10              | 208758_at      | D89976         | ATIC                                  | 0.001570 | 10.50 | 10.85 | 10.86 | 10.93 | 10.73 | 11.11 | 10.50 | 10.58 | 10.92 | 10.42 | 10.39 | 10.67 | 9.04  | 8.84  | 9.33  | 8.41  | 8.46  | 8.94                  | 0.66 |
| 10              | 1565162_s_at   | D16947         | MGST1                                 | 0.014800 | 11.03 | 11.65 | 11.70 | 11.40 | 11.55 | 11.57 | 11.44 | 11.18 | 11.65 | 10.99 | 10.86 | 11.60 | 9.52  | 9.35  | 9.99  | 9.01  | 9.06  | 9.37                  | 0.70 |
| 10              | 202595_s_at    | AF161461       | LEPROTL1                              | 0.004912 | 9.50  | 9.68  | 9.89  | 9.49  | 9.69  | 9.67  | 9.46  | 9.47  | 9.75  | 9.32  | 9.25  | 9.59  | 7.81  | 7.70  | 8.36  | 7.37  | 7.59  | 7.94                  | 0.70 |
| 10              | 205133_s_at    | NM_002157      | HSP1                                  | 0.005861 | 9.64  | 10.13 | 10.11 | 10.01 | 9.95  | 10.18 | 9.91  | 9.88  | 10.16 | 9.58  | 9.58  | 9.93  | 8.11  | 7.86  | 8.71  | 7.97  | 8.05  | 8.01                  | 0.61 |
| 10              | 204992_s_at    | NM_002628      | PFN2                                  | 0.003195 | 11.49 | 11.71 | 11.80 | 11.75 | 11.61 | 12.08 | 11.48 | 11.52 | 11.93 | 11.15 | 11.21 | 11.35 | 9.93  | 9.79  | 10.52 | 9.38  | 9.55  | 9.61                  | 0.69 |
| 10              | 219329_s_at    | NM_016085      | C2orf28                               | 0.000083 | 11.17 | 11.34 | 11.42 | 11.38 | 11.23 | 11.33 | 11.18 | 11.08 | 11.41 | 10.79 | 10.76 | 10.98 | 9.38  | 9.17  | 9.84  | 9.06  | 9.14  | 9.09                  | 0.46 |
| 10              | 201405_s_at    | NM_006833      | COPS6                                 | 0.001498 | 10.14 | 10.33 | 10.39 | 10.57 | 10.30 | 10.53 | 10.25 | 10.17 | 10.34 | 9.98  | 9.96  | 10.12 | 8.69  | 8.59  | 9.26  | 8.28  | 8.51  | 8.64                  | 0.61 |
| 10              | 209093_s_at    | NM_000687      | AHCY                                  | 0.003048 | 10.53 | 10.86 | 10.94 | 10.90 | 10.78 | 10.97 | 10.58 | 10.61 | 10.97 | 10.42 | 10.32 | 10.56 | 9.13  | 8.98  | 9.60  | 8.78  | 8.91  | 9.11                  | 0.44 |
| 10              | 209160_at      | AB018580       | AKR1C3                                | 0.041666 | 13.50 | 13.60 | 13.57 | 13.58 | 13.47 | 13.74 | 13.48 | 13.39 | 13.66 | 13.32 | 13.34 | 13.50 | 12.21 | 12.14 | 12.86 | 11.88 | 12.13 | 12.25                 | 0.86 |
| 10              | 205769_at      | NM_003645      | SLC27A2                               | 0.008160 | 9.53  | 9.97  | 10.00 | 9.73  | 9.71  | 10.03 | 9.84  | 9.54  | 9.91  | 8.92  | 8.86  | 9.26  | 7.38  | 7.26  | 8.39  | 6.65  | 6.69  | 7.20                  | 0.76 |
| 10              | 201302_at      | NM_001153      | ANXA4                                 | 0.016786 | 11.99 | 12.11 | 12.10 | 11.95 | 11.66 | 12.30 | 11.80 | 11.53 | 12.05 | 11.29 | 11.30 | 11.59 | 9.91  | 9.58  | 10.82 | 8.67  | 8.84  | 9.33                  | 1.11 |
| 10              | 201013_s_at    | AA902652       | PAICS                                 | 0.014269 | 10.46 | 10.80 | 10.87 | 10.92 | 10.56 | 10.93 | 10.42 | 10.43 | 10.74 | 10.32 | 10.20 | 10.46 | 9.11  | 8.92  | 9.85  | 8.19  | 8.34  | 8.59                  | 1.12 |
| 10              | 201301_s_at    | BC000182       | ANXA4                                 | 0.028144 | 11.34 | 11.88 | 11.83 | 11.67 | 11.45 | 12.08 | 11.27 | 11.02 | 11.64 | 10.85 | 10.79 | 11.35 | 9.56  | 9.35  | 10.35 |       |       |                       |      |

| K-Mean<br>Order | Probe<br>Names | GBiD      | Gene<br>Symbol      | Adj. p-Value<br>≤0.05,<br>Bonferroni |       |       |       |       |       |       |       |       |       |       |       |       |       |       |       |       |       |       | K-Means<br>Similarity |
|-----------------|----------------|-----------|---------------------|--------------------------------------|-------|-------|-------|-------|-------|-------|-------|-------|-------|-------|-------|-------|-------|-------|-------|-------|-------|-------|-----------------------|
|                 |                |           |                     |                                      | c1    | c2    | c3    | 6h1   | 6h2   | 6h3   | 12h1  | 12h2  | 12h3  | 24h1  | 24h2  | 24h3  | 48h1  | 48h2  | 48h3  | 72h1  | 72h2  | 72h3  |                       |
| 10              | 219806_s_at    | NM_020179 | FN5                 | 0.0027919                            | 7.36  | 7.38  | 7.42  | 7.43  | 7.34  | 7.31  | 7.48  | 7.58  | 7.93  | 7.17  | 7.28  | 7.12  | 6.65  | 6.59  | 6.83  | 6.40  | 6.27  | 6.62  | 1.42                  |
| 10              | 213828_x_at    | AA477655  | H3F3A /// LOC440926 | 0.010241                             | 12.82 | 12.85 | 12.79 | 12.78 | 12.73 | 12.68 | 12.66 | 12.65 | 12.83 | 12.37 | 12.32 | 12.53 | 11.15 | 11.10 | 11.73 | 11.49 | 11.80 | 11.55 | 1.15                  |
| 10              | 208755_x_at    | BF312331  | H3F3A               | 0.021556                             | 12.78 | 12.81 | 12.75 | 12.71 | 12.64 | 12.57 | 12.67 | 12.58 | 12.78 | 12.32 | 12.31 | 12.48 | 11.27 | 11.17 | 11.80 | 11.46 | 11.79 | 11.58 | 1.12                  |
| 10              | 211940_x_at    | BE869922  | H3F3A /// LOC440926 | 0.021533                             | 12.49 | 12.55 | 12.50 | 12.46 | 12.40 | 12.31 | 12.41 | 12.33 | 12.52 | 12.02 | 11.98 | 12.25 | 10.84 | 10.80 | 11.44 | 11.06 | 11.45 | 11.14 | 1.08                  |
| 10              | 223086_x_at    | AF151075  | MRPL51              | 0.041769                             | 11.14 | 11.26 | 11.23 | 11.05 | 10.87 | 10.81 | 10.90 | 10.85 | 11.20 | 10.58 | 10.55 | 10.81 | 9.30  | 9.28  | 10.00 | 9.64  | 9.67  | 9.93  | 1.15                  |
| 10              | 221476_s_at    | AF279903  | RPL15               | 0.004464                             | 12.88 | 13.10 | 13.11 | 12.70 | 12.80 | 12.89 | 12.95 | 12.79 | 13.07 | 12.53 | 12.62 | 12.80 | 11.67 | 11.72 | 12.01 | 11.84 | 11.95 | 11.98 | 1.03                  |
| 10              | 209503_s_at    | AF035309  | PSMC5               | 0.014020                             | 10.98 | 11.35 | 11.31 | 11.04 | 10.88 | 11.03 | 11.04 | 10.92 | 11.28 | 10.74 | 10.79 | 11.00 | 9.92  | 9.81  | 10.14 | 9.93  | 9.95  | 10.14 | 0.89                  |
| 10              | 200701_at      | NM_006432 | NPC2                | 0.025723                             | 10.65 | 10.91 | 10.86 | 10.43 | 10.65 | 10.73 | 10.89 | 10.73 | 10.90 | 10.52 | 10.48 | 10.65 | 9.50  | 9.43  | 9.96  | 9.54  | 9.64  | 9.78  | 1.07                  |
| 10              | 217797_at      | NM_016406 | UFC1                | 0.032033                             | 10.30 | 10.55 | 10.67 | 10.33 | 10.46 | 10.33 | 10.48 | 10.36 | 10.44 | 10.27 | 10.33 | 10.49 | 9.54  | 9.39  | 9.69  | 9.43  | 9.66  | 9.71  | 1.15                  |
| 10              | 212544_at      | AI131008  | ZNHIT3              | 0.000687                             | 9.36  | 9.57  | 9.59  | 9.47  | 9.43  | 9.43  | 9.51  | 9.35  | 9.56  | 9.27  | 9.15  | 9.45  | 8.26  | 8.21  | 8.48  | 8.16  | 8.29  | 8.43  | 0.61                  |
| 10              | 218101_s_at    | NM_004549 | NDUFC2              | 0.000123                             | 11.20 | 11.46 | 11.46 | 11.17 | 11.22 | 10.98 | 11.11 | 11.05 | 11.20 | 10.61 | 10.63 | 10.90 | 9.12  | 8.94  | 9.45  | 8.92  | 9.00  | 9.41  | 0.61                  |
| 10              | 225844_at      | NM_019896 | POLE4               | 0.005217                             | 8.97  | 9.37  | 9.51  | 9.31  | 9.18  | 9.23  | 9.17  | 9.15  | 9.14  | 9.06  | 8.91  | 9.29  | 7.91  | 7.71  | 8.10  | 7.72  | 7.95  | 7.92  | 0.84                  |
| 10              | 213047_x_at    | AI278616  | SET                 | 0.014112                             | 11.38 | 12.07 | 12.12 | 11.74 | 11.69 | 11.82 | 11.44 | 11.43 | 11.56 | 11.32 | 11.34 | 11.66 | 10.23 | 10.17 | 10.39 | 10.27 | 10.18 | 10.36 | 0.98                  |
| 10              | 213738_s_at    | AI587323  | ATP5A1              | 0.008901                             | 10.93 | 11.62 | 11.61 | 11.10 | 11.01 | 11.13 | 11.12 | 11.02 | 11.21 | 10.73 | 10.74 | 11.29 | 9.52  | 9.34  | 9.65  | 9.43  | 9.37  | 9.58  | 0.92                  |
| 10              | 216274_s_at    | N99438    | SEC11L1             | 0.020685                             | 11.31 | 11.79 | 11.82 | 11.33 | 11.44 | 11.55 | 11.43 | 11.33 | 11.69 | 11.22 | 11.24 | 11.73 | 10.19 | 10.21 | 10.31 | 10.05 | 10.14 | 10.22 | 1.01                  |
| 10              | 226796_at      | AI817418  | LOC116236           | 0.006469                             | 7.94  | 8.21  | 8.16  | 8.05  | 8.12  | 7.80  | 8.15  | 8.13  | 8.32  | 7.90  | 7.80  | 7.98  | 7.05  | 7.06  | 7.32  | 7.03  | 7.17  | 7.09  | 1.02                  |
| 10              | 204588_s_at    | NM_003982 | SLC7A7              | 0.004130                             | 9.81  | 10.40 | 10.20 | 10.05 | 10.22 | 10.08 | 9.86  | 9.82  | 10.14 | 9.65  | 9.49  | 9.83  | 8.33  | 8.34  | 8.66  | 8.62  | 8.67  | 8.78  | 0.88                  |
| 10              | 202077_at      | NM_005003 | NDUFAB1             | 0.001376                             | 11.05 | 11.46 | 11.28 | 11.36 | 11.31 | 11.09 | 11.24 | 11.12 | 11.29 | 11.18 | 11.11 | 11.36 | 10.02 | 9.96  | 10.15 | 10.15 | 10.23 | 10.23 | 1.16                  |
| 10              | 201227_s_at    | NM_005004 | NDUFB8              | 0.000916                             | 10.71 | 10.88 | 10.84 | 10.91 | 10.72 | 10.57 | 10.79 | 10.66 | 10.67 | 10.51 | 10.46 | 10.71 | 9.64  | 9.42  | 9.71  | 9.71  | 9.72  | 9.76  | 1.00                  |
| 10              | 219419_at      | NM_024805 | C18orf22            | 0.002192                             | 8.99  | 9.27  | 9.17  | 9.28  | 9.17  | 9.04  | 9.09  | 9.03  | 9.08  | 8.99  | 8.97  | 9.06  | 8.26  | 8.11  | 8.37  | 8.24  | 8.35  | 8.33  | 0.90                  |
| 10              | 202121_s_at    | NM_014453 | CHMP2A              | 0.000927                             | 10.03 | 10.32 | 10.27 | 10.35 | 10.23 | 10.09 | 10.24 | 10.02 | 10.27 | 9.99  | 9.86  | 10.10 | 8.88  | 8.72  | 8.96  | 9.07  | 9.20  | 9.27  | 1.12                  |
| 10              | 223442_at      | BC005050  | NICN1               | 0.000335                             | 8.32  | 8.50  | 8.40  | 8.26  | 8.37  | 8.23  | 8.25  | 8.18  | 8.32  | 8.06  | 7.99  | 8.00  | 7.53  | 7.60  | 7.65  | 7.73  | 7.70  | 7.65  | 1.31                  |
| 10              | 202427_s_at    | NM_015415 | BRP44               | 0.001102                             | 9.69  | 10.03 | 10.01 | 9.60  | 9.46  | 9.47  | 9.47  | 9.23  | 9.41  | 9.10  | 9.07  | 9.38  | 8.11  | 8.22  | 8.47  | 8.36  | 8.40  | 8.32  | 1.32                  |
| 10              | 200098_s_at    | T33068    | ANAPC5              | 0.012393                             | 10.26 | 10.64 | 10.47 | 10.28 | 10.19 | 9.86  | 10.13 | 10.17 | 10.19 | 9.72  | 9.71  | 10.13 | 8.83  | 8.69  | 9.03  | 8.97  | 9.08  | 9.18  | 1.31                  |
| 10              | 200663_at      | NM_001780 | CD63                | 0.002963                             | 12.08 | 12.34 | 12.33 | 12.13 | 12.13 | 11.90 | 12.24 | 12.06 | 12.15 | 11.82 | 11.85 | 11.96 | 11.23 | 11.20 | 11.31 | 11.39 | 11.47 | 11.46 | 1.37                  |
| 10              | 222996_s_at    | BC002490  | CXXC5               | 0.000899                             | 9.30  | 9.64  | 9.60  | 9.46  | 9.13  | 8.92  | 9.41  | 9.22  | 9.16  | 8.75  | 8.81  | 8.88  | 8.00  | 7.93  | 7.79  | 7.85  | 7.76  | 7.84  | 1.23                  |
| 10              | 203803_at      | N45309    | PCYOX1              | 0.000009                             | 7.87  | 8.56  | 8.52  | 8.45  | 8.08  | 7.81  | 8.35  | 8.29  | 8.37  | 7.42  | 7.09  | 6.93  | 4.88  | 4.86  | 4.88  | 4.72  | 5.03  | 4.66  | 0.86                  |
| 10              | 202295_s_at    | NM_004390 | CTSH                | 0.000078                             | 8.72  | 8.82  | 8.78  | 8.59  | 8.64  | 8.57  | 8.61  | 8.63  | 8.55  | 8.39  | 8.36  | 8.37  | 7.88  | 7.57  | 7.86  | 7.66  | 7.73  | 7.74  | 0.93                  |
| 10              | 233955_x_at    | AK001782  | CXXC5               | 0.000324                             | 10.67 | 11.08 | 10.85 | 10.85 | 10.54 | 10.41 | 10.79 | 10.64 | 10.46 | 9.99  | 10.20 | 10.01 | 8.75  | 8.42  | 8.92  | 8.83  | 8.66  | 8.93  | 1.00                  |
| 10              | 200645_at      | NM_007278 | GABARAP             | 0.000396                             | 11.95 | 12.15 | 12.04 | 12.01 | 12.13 | 11.74 | 11.97 | 11.93 | 11.87 | 11.60 | 11.63 | 11.69 | 10.55 | 10.44 | 10.84 | 10.69 | 10.65 | 10.77 | 0.87                  |
| 10              | 225967_s_at    | BF683512  | LOC284184           | 0.000095                             | 10.41 | 10.53 | 10.58 | 10.78 | 10.36 | 10.22 | 10.49 | 10.33 | 10.19 | 9.84  | 9.92  | 10.12 | 8.67  | 8.48  | 8.77  | 8.52  | 8.54  | 8.57  | 0.79                  |
| 10              | 201253_s_at    | NM_006319 | CDIPT               | 0.000101                             | 10.38 | 10.48 | 10.51 | 10.48 | 10.49 | 10.31 | 10.42 | 10.35 | 10.40 | 9.95  | 9.99  | 10.03 | 9.24  | 9.11  | 9.49  | 9.10  | 9.24  | 9.28  | 0.64                  |
| 10              | 212992_at      | AI935123  | C14orf78            | 0.000052                             | 10.59 | 10.93 | 10.94 | 10.93 | 10.71 | 10.48 | 10.59 | 10.60 | 10.62 | 9.98  | 10.06 | 10.02 | 8.56  | 8.29  | 8.73  | 8.20  | 8.26  | 8.67  | 0.60                  |
| 10              | 227962_at      | BF435852  | ACOX1               | 0.000101                             | 8.20  | 8.38  | 8.36  | 8.12  | 8.27  | 8.05  | 8.26  | 8.15  | 8.11  | 7.68  | 7.77  | 7.85  | 7.15  | 7.19  | 7.16  | 7.07  | 7.00  | 7.25  | 1.03                  |
| 10              | 206656_s_at    | BC000353  | C20orf3             | 0.001185                             | 10.13 | 10.70 | 10.67 | 10.23 | 10.41 | 10.20 | 10.22 | 10.30 | 10.15 | 9.40  | 9.46  | 9.91  | 8.00  | 8.09  | 8.28  | 8.12  | 8.03  | 8.64  | 0.88                  |
| 10              | 201587_s_at    | NM_001569 | IRAK1               | 0.019745                             | 11.59 | 11.89 | 11.89 | 11.83 | 11.46 | 11.51 | 11.55 | 11.56 | 11.54 | 11.38 | 11.41 | 11.50 | 10.46 | 10.36 | 10.81 | 10.32 | 10.33 | 10.64 | 0.94                  |
| 10              | 202054_s_at    | NM_000382 | ALDH3A2             | 0.009340                             | 10.18 | 10.47 | 10.53 | 10.02 | 9.92  | 9.86  | 9.71  | 9.66  | 10.06 | 9.44  | 9.33  | 9.69  | 7.79  | 7.90  | 8.61  | 7.39  | 7.36  | 8.13  | 0.93                  |
| 10              | 201322_at      | NM_001686 | ATP5B               | 0.006099                             | 12.17 | 12.48 | 12.60 | 12.26 | 12.21 | 12.23 | 12.16 | 12.13 | 12.32 | 11.92 | 11.96 | 12.21 | 10.93 | 10.87 | 11.38 | 10.66 | 10.62 | 10.93 | 0.76                  |
| 10              | 200657_at      | NM_001152 | SLC25A5             | 0.008918                             | 12.54 | 12.85 | 12.88 | 12.65 | 12.54 | 12.77 | 12.51 | 12.41 | 12.74 | 12.26 | 12.29 | 12.58 | 11.21 | 11.25 | 11.74 | 11.17 | 11.04 | 11.18 | 0.71                  |
| 10              | 224575_at      | BE868361  | C3orf10             | 0.008505                             | 10.15 | 10.59 | 10.54 | 10.15 | 10.28 | 10.27 | 10.13 | 10.07 | 10.34 | 9.86  | 9.90  | 10.05 | 8.95  | 8.82  | 9.23  | 8.80  | 8.50  | 9.00  | 0.76                  |
| 10              | 208846_s_at    | U09043    | VDAC3               | 0.029174                             | 9     |       |       |       |       |       |       |       |       |       |       |       |       |       |       |       |       |       |                       |

| K-Mean<br>Order | Probe<br>Names | Gene<br>Symbol | GBiD                       | Adj. p-Value<br>≤0.05, |       |       |       |       |       |       |       |       |       |       |       |       |       |       |       |       | K-Means<br>Similarity |       |      |
|-----------------|----------------|----------------|----------------------------|------------------------|-------|-------|-------|-------|-------|-------|-------|-------|-------|-------|-------|-------|-------|-------|-------|-------|-----------------------|-------|------|
|                 |                |                |                            | Bonferroni             | c1    | c2    | c3    | 6h1   | 6h2   | 6h3   | 12h1  | 12h2  | 12h3  | 24h1  | 24h2  | 24h3  | 48h1  | 48h2  | 48h3  | 72h1  | 72h2                  | 72h3  |      |
| 10              | 201568_at      | NM_014402      | QP-C                       | 0.010358               | 11.27 | 11.31 | 11.38 | 11.37 | 11.26 | 11.05 | 11.27 | 11.16 | 10.95 | 10.94 | 10.97 | 11.19 | 9.67  | 9.75  | 10.18 | 9.61  | 10.08                 | 9.76  | 1.11 |
| 10              | 226616_s_at    | NM_021075      | NDUFV3                     | 0.033161               | 9.71  | 9.97  | 9.82  | 9.75  | 9.77  | 9.49  | 9.68  | 9.54  | 9.36  | 9.48  | 9.37  | 9.61  | 8.61  | 8.37  | 8.85  | 8.65  | 8.64                  | 8.76  | 1.28 |
| 10              | 200021_at      | NM_005507      | CFL1                       | 0.003237               | 13.39 | 13.53 | 13.45 | 13.48 | 13.47 | 13.40 | 13.35 | 13.42 | 13.27 | 13.31 | 13.36 | 13.31 | 12.83 | 12.76 | 13.00 | 12.74 | 12.84                 | 12.78 | 1.03 |
| 10              | 224684_at      | AL559283       | SNX12                      | 0.021923               | 8.91  | 9.42  | 9.31  | 9.20  | 9.41  | 9.22  | 9.12  | 9.21  | 9.06  | 8.89  | 8.96  | 8.99  | 8.18  | 8.28  | 8.41  | 8.12  | 8.27                  | 8.15  | 0.97 |
| 10              | 227008_at      | AI393309       | HDDC3                      | 0.003822               | 8.62  | 8.81  | 8.79  | 8.80  | 8.74  | 8.58  | 8.86  | 8.70  | 8.71  | 8.57  | 8.51  | 8.74  | 7.64  | 7.42  | 7.79  | 7.55  | 7.82                  | 7.45  | 1.06 |
| 10              | 200925_at      | NM_004373      | COX6A1                     | 0.000821               | 12.47 | 12.58 | 12.53 | 12.46 | 12.61 | 12.47 | 12.56 | 12.48 | 12.44 | 12.41 | 12.38 | 12.48 | 11.46 | 11.20 | 11.72 | 11.37 | 11.39                 | 11.38 | 0.91 |
| 10              | 223694_at      | AF220032       | TRIM7                      | 0.001454               | 8.34  | 8.58  | 8.50  | 8.70  | 8.57  | 8.42  | 8.44  | 8.56  | 8.63  | 8.45  | 8.18  | 8.50  | 7.27  | 7.06  | 7.36  | 7.36  | 7.30                  | 7.03  | 1.03 |
| 10              | 200844_s_at    | BE869583       | PRDX6                      | 0.024128               | 11.45 | 11.68 | 11.76 | 11.60 | 11.61 | 11.42 | 11.41 | 11.44 | 11.59 | 11.37 | 11.35 | 11.59 | 10.55 | 10.41 | 10.90 | 10.32 | 10.50                 | 10.45 | 0.92 |
| 10              | 218898_at      | NM_024792      | FAM57A                     | 0.003216               | 9.55  | 10.00 | 9.97  | 10.01 | 10.03 | 9.55  | 9.86  | 9.91  | 9.73  | 9.60  | 9.55  | 9.61  | 8.12  | 8.38  | 8.67  | 8.08  | 8.00                  | 8.16  | 0.93 |
| 10              | 200046_at      | NM_001344      | DAD1                       | 0.000817               | 11.27 | 11.46 | 11.72 | 11.47 | 11.60 | 11.06 | 11.29 | 11.21 | 11.27 | 10.96 | 10.84 | 11.08 | 9.47  | 9.42  | 9.96  | 9.42  | 9.40                  | 9.35  | 0.78 |
| 10              | 211787_s_at    | BC006210       | E1F4A1                     | 0.009831               | 12.85 | 13.03 | 13.06 | 13.13 | 13.06 | 12.90 | 12.97 | 12.90 | 12.98 | 12.81 | 12.88 | 13.00 | 12.19 | 12.23 | 12.45 | 12.22 | 12.20                 | 12.07 | 0.99 |
| 10              | 201530_x_at    | NM_001416      | E1F4A1                     | 0.008590               | 13.03 | 13.20 | 13.09 | 13.30 | 13.30 | 13.11 | 13.10 | 13.13 | 13.18 | 13.03 | 13.08 | 13.11 | 12.46 | 12.49 | 12.74 | 12.44 | 12.48                 | 12.40 | 1.00 |
| 10              | 2121058_s_at   | NM_016326      | CKLF                       | 0.012387               | 7.33  | 7.51  | 7.48  | 8.11  | 7.81  | 7.53  | 7.48  | 7.31  | 7.12  | 7.05  | 6.77  | 7.16  | 5.93  | 5.86  | 5.79  | 6.37  | 5.77                  | 5.82  | 1.46 |
| 10              | 214259_s_at    | A1144075       | AKR7A2                     | 0.000381               | 8.40  | 8.60  | 8.37  | 9.07  | 8.80  | 8.68  | 8.55  | 8.49  | 8.29  | 8.14  | 8.02  | 8.07  | 7.42  | 7.03  | 6.94  | 6.95  | 6.78                  | 6.76  | 1.23 |
| 10              | 226134_s_at    | AI978754       | MSI2                       | 0.000005               | 8.17  | 8.77  | 8.88  | 9.23  | 8.90  | 8.85  | 8.26  | 8.31  | 8.32  | 7.34  | 7.30  | 7.59  | 5.75  | 5.66  | 5.83  | 5.44  | 5.20                  | 5.61  | 0.77 |
| 10              | 44065_at       | AI937468       | FLJ14827                   | 0.000560               | 7.24  | 7.60  | 7.46  | 7.70  | 7.67  | 7.48  | 7.38  | 7.27  | 7.29  | 7.14  | 7.05  | 7.07  | 6.60  | 6.44  | 6.42  | 6.47  | 6.41                  | 6.41  | 1.12 |
| 10              | 36830_at       | U80034         | MIPEP                      | 0.022652               | 6.54  | 7.04  | 6.83  | 7.17  | 6.78  | 6.86  | 6.79  | 6.66  | 6.76  | 6.34  | 6.42  | 6.63  | 5.68  | 5.75  | 5.68  | 5.52  | 5.80                  | 5.67  | 1.00 |
| 10              | 200988_s_at    | NM_005789      | PSME3                      | 0.011727               | 7.81  | 7.98  | 7.90  | 8.05  | 8.02  | 7.90  | 7.78  | 7.71  | 7.83  | 7.39  | 7.57  | 7.61  | 7.18  | 7.00  | 7.23  | 6.86  | 7.16                  | 7.09  | 1.12 |
| 10              | 222609_s_at    | AL582889       | EXOSC1                     | 0.008768               | 8.51  | 8.78  | 8.73  | 8.87  | 8.99  | 8.86  | 8.69  | 8.55  | 8.84  | 8.49  | 8.53  | 8.75  | 7.84  | 7.94  | 7.96  | 7.66  | 7.91                  | 7.81  | 0.95 |
| 10              | 225143_at      | AW182455       | SFXN4                      | 0.000498               | 8.70  | 8.88  | 8.80  | 9.27  | 9.30  | 8.86  | 8.70  | 8.84  | 8.76  | 8.77  | 8.58  | 8.69  | 7.45  | 7.52  | 7.50  | 6.96  | 6.97                  | 7.47  | 1.06 |
| 10              | 218270_at      | NM_024540      | MRPL24                     | 0.000529               | 10.22 | 10.47 | 10.53 | 10.84 | 10.82 | 10.56 | 10.52 | 10.47 | 10.33 | 10.24 | 10.19 | 10.44 | 9.13  | 9.19  | 9.44  | 9.12  | 8.96                  | 9.19  | 0.91 |
| 10              | 209233_at      | U72514         | C2F                        | 0.001834               | 9.47  | 9.63  | 9.75  | 9.98  | 10.04 | 9.80  | 9.70  | 9.74  | 9.75  | 9.54  | 9.34  | 9.71  | 8.60  | 8.64  | 8.83  | 8.39  | 8.50                  | 8.68  | 0.87 |
| 10              | 229119_s_at    | BG108034       | TTC19                      | 0.001497               | 8.84  | 9.22  | 9.20  | 9.46  | 9.43  | 9.22  | 9.06  | 9.06  | 9.13  | 9.06  | 8.93  | 9.05  | 7.52  | 7.63  | 7.98  | 7.37  | 7.59                  | 7.85  | 0.82 |
| 10              | 224666_at      | AF161451       | NSMCE1                     | 0.000935               | 9.06  | 9.19  | 9.17  | 9.98  | 9.85  | 9.37  | 9.42  | 9.36  | 9.22  | 9.05  | 8.94  | 9.06  | 7.79  | 7.67  | 7.67  | 7.55  | 7.73                  | 8.07  | 1.25 |
| 10              | 218307_at      | NM_018346      | RSAD1                      | 0.000385               | 9.02  | 9.19  | 9.02  | 9.24  | 9.48  | 9.21  | 9.21  | 9.20  | 9.22  | 8.86  | 8.88  | 8.79  | 7.95  | 8.12  | 8.14  | 7.64  | 7.96                  | 8.04  | 0.90 |
| 10              | 224448_s_at    | BC006007       | C6orf125                   | 0.040220               | 9.33  | 9.45  | 9.26  | 9.93  | 9.67  | 9.06  | 9.56  | 9.27  | 8.79  | 9.12  | 8.73  | 9.06  | 7.54  | 7.38  | 7.86  | 7.26  | 7.55                  | 7.29  | 1.25 |
| 10              | 209219_at      | L03411         | RDBP                       | 0.001169               | 9.97  | 9.97  | 9.92  | 10.44 | 10.18 | 9.89  | 10.00 | 9.90  | 9.71  | 9.79  | 9.58  | 9.74  | 8.73  | 8.68  | 8.64  | 8.32  | 8.68                  | 8.44  | 1.15 |
| 10              | 204386_s_at    | BF303597       | MRP63                      | 0.006024               | 10.37 | 10.19 | 10.18 | 10.69 | 10.63 | 10.49 | 10.39 | 10.16 | 10.33 | 10.02 | 9.83  | 9.92  | 8.77  | 8.40  | 9.25  | 8.31  | 8.70                  | 8.70  | 0.90 |
| 10              | 220647_s_at    | NM_016565      | CHCHD8                     | 0.000678               | 8.96  | 9.04  | 9.05  | 9.16  | 9.21  | 9.12  | 9.08  | 8.96  | 8.99  | 8.77  | 8.87  | 8.95  | 8.28  | 7.97  | 8.28  | 8.15  | 8.24                  | 8.14  | 0.87 |
| 10              | 202732_at      | NM_007066      | PKIG                       | 0.000388               | 8.86  | 9.05  | 8.90  | 8.97  | 8.83  | 8.98  | 8.77  | 8.64  | 8.61  | 8.34  | 8.34  | 8.63  | 7.30  | 7.10  | 7.46  | 7.25  | 7.44                  | 7.32  | 0.76 |
| 10              | 202306_at      | NM_002696      | POLR2G                     | 0.000135               | 10.13 | 10.46 | 10.23 | 10.62 | 10.52 | 10.34 | 10.17 | 10.04 | 9.96  | 9.85  | 9.77  | 10.04 | 8.81  | 8.67  | 8.97  | 8.70  | 8.73                  | 8.88  | 0.84 |
| 10              | 219162_s_at    | NM_016050      | MRPL11                     | 0.000160               | 9.10  | 8.96  | 9.05  | 9.60  | 9.38  | 9.31  | 9.12  | 8.98  | 9.03  | 8.87  | 8.69  | 8.93  | 7.79  | 7.87  | 8.03  | 7.82  | 8.05                  | 7.77  | 1.12 |
| 10              | 217720_at      | NM_016139      | CHCHD2                     | 0.002304               | 12.18 | 12.20 | 12.29 | 12.54 | 12.28 | 12.45 | 12.23 | 12.18 | 12.21 | 12.14 | 12.09 | 12.30 | 11.46 | 11.33 | 11.57 | 11.32 | 11.54                 | 11.32 | 1.04 |
| 10              | 219953_s_at    | NM_020642      | C11orf17                   | 0.005194               | 8.21  | 8.37  | 8.45  | 8.72  | 8.46  | 8.50  | 8.18  | 8.27  | 8.11  | 8.19  | 8.11  | 7.99  | 7.55  | 7.31  | 7.42  | 7.05  | 7.26                  | 7.45  | 1.19 |
| 10              | 209917_s_at    | BC002709       | TP53AP1                    | 0.002409               | 7.70  | 7.60  | 7.47  | 7.71  | 7.74  | 7.75  | 7.65  | 7.76  | 7.51  | 7.49  | 7.12  | 7.33  | 6.68  | 6.62  | 6.65  | 6.66  | 6.75                  | 6.50  | 1.27 |
| 10              | 204488_at      | NM_014908      | TMEM15                     | 0.014776               | 8.28  | 8.37  | 8.35  | 8.54  | 8.58  | 8.25  | 8.40  | 8.46  | 8.31  | 8.04  | 8.05  | 8.11  | 7.60  | 7.51  | 7.78  | 7.44  | 7.66                  | 7.46  | 1.17 |
| 10              | 214838_at      | AL035297       | SFT2D2                     | 0.004292               | 7.90  | 7.88  | 7.95  | 7.97  | 7.77  | 7.97  | 7.86  | 7.93  | 7.97  | 7.68  | 7.74  | 7.77  | 7.51  | 7.50  | 7.41  | 7.30  | 7.36                  | 7.29  | 1.24 |
| 10              | 227869_at      | BG500573       | ---                        | 0.043673               | 7.90  | 8.06  | 7.96  | 7.96  | 7.86  | 8.22  | 7.85  | 7.76  | 7.90  | 7.68  | 7.73  | 7.78  | 7.16  | 7.25  | 7.34  | 6.78  | 7.19                  | 6.98  | 1.18 |
| 10              | 224395_s_at    | AF312226       | RNF7                       | 0.013067               | 9.85  | 9.95  | 9.93  | 9.86  | 10.04 | 9.83  | 9.94  | 9.88  | 9.88  | 9.77  | 9.76  | 9.93  | 9.28  | 9.34  | 9.32  | 9.46  | 9.53                  | 9.39  | 1.51 |
| 10              | 1553987_at     | BC007973       | FLJ39616                   | 0.040348               | 8.87  | 9.13  | 9.14  | 9.20  | 9.51  | 9.07  | 9.14  | 9.01  | 8.91  | 8.74  | 8.74  | 8.97  | 8.12  | 8.20  | 8.28  | 8.32  | 8.32                  | 1.44  |      |
| 10              | 218795_at      | NM_016361      | ACPB                       | 0.024133               | 8.66  | 9.06  | 8.90  | 8.97  | 8.90  | 8.54  | 8.75  | 8.81  | 8.75  | 8.58  | 8.60  | 8.69  | 7.63  | 7.66  | 7.68  | 7.92  | 7.69                  | 7.41  | 1.31 |
| 10              | 213540_at      | AL031228       | HSD17B8                    | 0.000248               | 8.39  | 8.51  | 8.41  | 8.45  | 8.38  | 8.28  | 8.45  | 8.39  | 8.33  | 8.35  | 8.25  | 8.29  | 7.57  | 7.55  | 7.53  | 7.75  | 7.59                  | 7.47  | 1.27 |
| 10              | 201483_s_at    | BC002802       | SUPT4H1                    | 0.021436               | 9.86  | 9.97  | 10.00 | 9.96  | 9.97  | 9.68  | 10.05 | 9.80  | 9.70  | 9.85  | 9.68  | 9.84  | 9.03  | 9.08  | 8.90  | 9.07  | 9.13                  | 8.95  | 1.49 |
| 10              | 207760_s_at    | NM_006312      | NCOR2                      | 0.028271               | 10.43 | 11.09 | 10.89 | 10.83 | 11.03 | 10.56 | 10.30 | 10.54 | 10.56 | 10.52 | 10.45 | 10.55 | 9.39  | 9.59  | 9.47  | 9.48  | 9.42                  | 9.33  | 1.31 |
| 10              | 224333_s_at    | AB049940       | MRPS5                      | 0.002375               | 9.77  | 9.96  | 9.89  | 9.98  | 9.93  | 9.79  | 9.72  | 9.86  | 9.75  | 9.72  | 9.65  | 9.79  | 9.13  | 9.16  | 9.02  | 9.22  | 9.02                  | 9.16  | 1.17 |
| 10              | 228764_s_at    | AI813313       | CHMP4A /// MGC5987         | 0.014616               | 7.87  | 8.10  | 7.87  | 8.17  | 7.99  | 8.19  | 8.06  | 7.91  | 8.09  | 7.98  | 7.90  | 7.98  | 7.35  | 7.24  | 6.96  | 7.20  | 7.24                  | 7.20  | 1.40 |
| 10              | 213801_x_at    | AW304232       | RPSA /// LOC388524 /// LOC | 0.000611               | 13.60 | 13.73 | 13.72 | 13.69 | 13.71 | 13.58 | 13.64 | 13.65 | 13.65 | 13.65 | 13.65 | 13.69 | 13.16 | 13.04 | 12.94 | 12.99 | 13.03                 | 13.11 | 1.29 |
| 10              | 200709_at      | NM_000801      | FKBP1A                     | 0.005243               | 10.90 | 11.33 | 11.22 | 11.27 | 11.23 | 11.44 | 10.97 | 11.17 | 11.43 | 10.96 | 11.06 | 10.94 | 10.06 | 9.99  | 10.47 | 9.52  | 9.42                  | 9.60  | 1.14 |
| 10              | 212658_at      | N66633         | LHFPL2                     | 0.009262               | 8.62  | 8.84  | 8.80  | 8.77  | 8.92  | 8.90  | 8.68  | 8.81  | 8.88  | 8.70  | 8.78  | 8.78  | 8.27  | 8.21  | 8.36  | 7.91  | 7.91                  | 8.12  | 1.23 |
| 10              | 228570_at      | BF510581       | BTBD11                     | 0.000413               | 9.92  | 10.03 | 10.13 | 10.54 | 10.66 | 10.79 | 9.80  | 10.03 | 10.44 | 9.97  | 9.98  | 10.03 | 8.78  | 8.45  | 8.92  | 7.18  | 7.29                  | 7.90  | 1.43 |
| 10              | 212223_at      | AI926544       | IDS                        | 0.001942               | 9.63  | 9.84  | 9.98  | 10.15 | 10.12 | 9.85  | 9.87  | 10.02 | 10.11 | 9.71  | 9.87  |       |       |       |       |       |                       |       |      |

| K-Mean<br>Order | Probe<br>Names | GBiD      | Gene<br>Symbol     | Adj. p-Value<br>≤0.05, |       |       |       |       |       |       |       |       |       |       |       |       |       |       |       |       |       |       | K-Means<br>Similarity |
|-----------------|----------------|-----------|--------------------|------------------------|-------|-------|-------|-------|-------|-------|-------|-------|-------|-------|-------|-------|-------|-------|-------|-------|-------|-------|-----------------------|
|                 |                |           |                    | Bonferroni             | c1    | c2    | c3    | 6h1   | 6h2   | 6h3   | 12h1  | 12h2  | 12h3  | 24h1  | 24h2  | 24h3  | 48h1  | 48h2  | 48h3  | 72h1  | 72h2  | 72h3  |                       |
| 10              | 228763_at      | AI813313  | CHMP4A /// MGC5987 | 0.021364               | 8.60  | 8.56  | 8.34  | 8.72  | 8.53  | 8.79  | 8.77  | 8.50  | 8.97  | 8.55  | 8.36  | 8.47  | 7.70  | 7.36  | 7.57  | 7.41  | 7.42  | 7.68  | 1.15                  |
| 10              | 224724_at      | AL133001  | SULF2              | 0.024074               | 8.97  | 9.06  | 9.01  | 9.12  | 9.19  | 9.48  | 9.25  | 9.24  | 9.60  | 8.64  | 8.73  | 8.74  | 7.97  | 7.24  | 7.82  | 7.69  | 7.78  | 8.02  | 1.22                  |
| 10              | 228176_at      | AA534817  | EDG3               | 0.014513               | 10.37 | 10.54 | 10.62 | 10.74 | 10.99 | 11.07 | 11.00 | 11.09 | 11.37 | 10.40 | 10.38 | 10.47 | 9.93  | 9.74  | 10.09 | 9.97  | 9.94  | 9.97  | 2.02                  |
| 10              | 200748_s_at    | NM_002032 | FTH1               | 0.019233               | 13.29 | 13.53 | 13.57 | 13.86 | 13.83 | 13.80 | 13.71 | 13.66 | 13.83 | 13.53 | 13.57 | 13.72 | 12.81 | 12.68 | 13.08 | 12.62 | 12.81 | 12.86 | 1.27                  |
| 10              | 203041_s_at    | J04183    | LAMP2              | 0.001641               | 8.55  | 8.91  | 8.99  | 9.25  | 9.50  | 9.56  | 9.55  | 9.43  | 10.00 | 9.26  | 9.12  | 9.35  | 7.77  | 7.68  | 8.03  | 7.73  | 7.59  | 7.52  | 1.62                  |
| 10              | 204955_at      | NM_006307 | SRPX               | 0.000025               | 7.75  | 7.91  | 7.86  | 8.41  | 8.38  | 8.34  | 8.91  | 8.51  | 8.90  | 7.91  | 7.91  | 8.01  | 5.97  | 6.52  | 6.50  | 5.90  | 5.91  | 6.20  | 1.30                  |
| 10              | 226671_at      | AI150000  | ---                | 0.005299               | 6.82  | 7.04  | 6.99  | 7.31  | 7.38  | 7.53  | 8.02  | 7.54  | 8.23  | 6.78  | 6.65  | 6.87  | 4.98  | 5.32  | 5.47  | 5.14  | 5.29  | 5.98  | 1.50                  |
| 10              | 226538_at      | AV700323  | MAN2A1             | 0.027381               | 8.05  | 8.24  | 8.18  | 8.78  | 8.74  | 9.12  | 8.54  | 8.57  | 9.29  | 8.19  | 8.20  | 8.07  | 6.74  | 6.90  | 7.30  | 6.73  | 6.92  | 7.18  | 1.38                  |
| 10              | 225314_at      | BG291649  | OC1AD2             | 0.015939               | 10.06 | 10.18 | 10.27 | 10.60 | 10.60 | 10.76 | 10.48 | 10.32 | 10.70 | 10.16 | 10.07 | 10.15 | 9.28  | 9.43  | 9.61  | 9.40  | 9.26  | 9.64  | 1.34                  |
| 10              | 213274_s_at    | AA020826  | CTSB               | 0.000051               | 8.58  | 8.71  | 8.79  | 9.59  | 9.71  | 9.66  | 9.58  | 9.60  | 9.84  | 8.62  | 8.80  | 8.58  | 7.33  | 7.15  | 7.63  | 7.09  | 6.84  | 7.44  | 1.41                  |
| 10              | 221511_x_at    | AB033080  | CCPG1              | 0.027276               | 7.62  | 7.95  | 7.83  | 8.20  | 8.73  | 8.57  | 8.69  | 8.34  | 9.06  | 7.76  | 7.79  | 7.69  | 6.55  | 6.80  | 7.01  | 6.08  | 6.44  | 6.78  | 1.60                  |
| 10              | 214151_s_at    | AU144243  | CCPG1              | 0.046693               | 7.62  | 7.65  | 7.48  | 8.29  | 8.49  | 8.56  | 8.43  | 8.26  | 8.96  | 7.81  | 7.70  | 7.78  | 6.91  | 7.02  | 7.10  | 6.57  | 6.36  | 7.09  | 2.05                  |
| 10              | 229116_at      | AI670947  | CNKSR2             | 0.034578               | 8.54  | 8.79  | 8.61  | 9.05  | 9.06  | 9.29  | 8.90  | 9.10  | 9.81  | 8.64  | 8.53  | 8.34  | 7.37  | 7.29  | 8.18  | 6.68  | 6.61  | 6.27  | 1.63                  |
| 10              | 226034_at      | BE222344  | DUSP4              | 0.001261               | 10.49 | 10.65 | 10.70 | 10.95 | 11.17 | 10.97 | 10.80 | 10.85 | 10.91 | 10.86 | 10.93 | 10.98 | 10.29 | 10.23 | 10.48 | 9.78  | 9.79  | 9.94  | 2.05                  |
| 10              | 202364_at      | NM_005962 | MXII               | 0.024974               | 9.82  | 9.87  | 9.72  | 10.70 | 10.86 | 11.05 | 10.39 | 10.39 | 10.97 | 10.27 | 10.36 | 10.01 | 9.15  | 9.06  | 9.65  | 7.95  | 8.58  | 8.60  | 2.04                  |
| 10              | 224707_at      | AL522667  | ORF1-FL49          | 0.017675               | 10.43 | 10.60 | 10.56 | 10.88 | 10.95 | 10.87 | 10.86 | 10.76 | 10.93 | 10.64 | 10.55 | 10.66 | 10.12 | 10.06 | 10.48 | 9.75  | 9.79  | 9.92  | 1.69                  |
| 10              | 212352_s_at    | BE780075  | TMED10             | 0.010275               | 10.66 | 10.91 | 10.92 | 11.39 | 11.60 | 11.42 | 11.06 | 11.16 | 11.54 | 10.81 | 10.90 | 11.16 | 10.02 | 9.83  | 10.02 | 9.03  | 9.08  | 9.74  | 1.42                  |
| 10              | 218856_at      | NM_016629 | TNFRSF21           | 0.000273               | 9.73  | 9.80  | 9.89  | 10.36 | 10.37 | 10.25 | 10.28 | 10.33 | 10.53 | 10.12 | 10.19 | 10.14 | 9.16  | 9.06  | 9.40  | 8.43  | 8.59  | 8.88  | 1.67                  |
| 10              | 212442_s_at    | BG289001  | LASS6              | 0.000334               | 9.71  | 9.76  | 9.43  | 10.48 | 10.25 | 10.30 | 10.05 | 9.98  | 10.18 | 10.11 | 9.84  | 9.98  | 8.68  | 8.63  | 9.09  | 7.86  | 8.19  | 8.20  | 1.59                  |
| 10              | 222116_s_at    | AL157485  | TBC1D16            | 0.024092               | 7.67  | 7.86  | 7.76  | 8.02  | 7.84  | 7.79  | 7.89  | 8.02  | 8.01  | 7.83  | 7.72  | 7.76  | 7.21  | 6.95  | 7.32  | 6.82  | 6.83  | 7.10  | 1.22                  |
| 10              | 206243_at      | NM_003256 | TIMP4              | 0.000006               | 8.70  | 8.57  | 8.45  | 8.99  | 9.02  | 8.70  | 8.97  | 9.07  | 8.90  | 8.49  | 8.41  | 8.44  | 7.40  | 7.67  | 7.50  | 6.93  | 7.05  | 6.97  | 1.33                  |
| 10              | 225002_s_at    | BE349022  | SUMF2              | 0.000023               | 8.95  | 8.73  | 8.77  | 9.37  | 9.12  | 9.25  | 9.20  | 9.15  | 9.37  | 8.95  | 8.82  | 8.74  | 7.89  | 7.73  | 8.00  | 7.38  | 7.52  | 7.54  | 1.20                  |
| 10              | 238332_at      | AI307802  | ANKRD29            | 0.004576               | 5.97  | 6.30  | 6.37  | 7.09  | 7.48  | 7.64  | 7.16  | 7.42  | 7.83  | 6.85  | 6.93  | 6.85  | 5.88  | 5.75  | 5.99  | 5.33  | 5.33  | 5.52  | 2.39                  |
| 10              | 225950_at      | AI369389  | ---                | 0.015184               | 8.22  | 8.10  | 8.24  | 8.45  | 8.59  | 8.31  | 8.63  | 8.36  | 8.64  | 8.20  | 8.08  | 7.41  | 7.27  | 7.42  | 7.40  | 7.58  | 7.09  | 1.56  |                       |
| 10              | 222494_at      | AW051527  | CHES1              | 0.015962               | 7.80  | 7.90  | 7.86  | 7.93  | 8.12  | 8.31  | 8.16  | 8.01  | 8.72  | 7.43  | 7.27  | 7.42  | 6.31  | 6.49  | 6.19  | 6.13  | 6.71  | 5.95  | 1.39                  |
| 10              | 228802_at      | BE348466  | RBPMS2             | 0.012913               | 8.35  | 8.35  | 8.31  | 8.52  | 8.44  | 8.32  | 8.44  | 8.50  | 8.65  | 8.21  | 8.12  | 8.11  | 7.76  | 7.85  | 7.54  | 7.77  | 7.75  | 7.65  | 1.63                  |
| 10              | 200755_s_at    | BF939365  | CALU               | 0.000516               | 9.54  | 9.89  | 9.67  | 10.26 | 10.26 | 9.99  | 9.60  | 9.70  | 9.94  | 9.35  | 9.35  | 9.41  | 8.65  | 8.65  | 8.87  | 8.16  | 8.19  | 8.44  | 1.13                  |
| 10              | 204565_at      | NM_018473 | THEM2              | 0.000781               | 9.49  | 9.33  | 9.22  | 10.21 | 10.10 | 10.48 | 9.48  | 9.25  | 9.58  | 9.47  | 9.32  | 9.34  | 8.10  | 7.97  | 8.58  | 7.42  | 7.72  | 7.84  | 1.50                  |
| 10              | 200734_s_at    | BG341906  | ARF3               | 0.000049               | 10.42 | 10.45 | 10.61 | 10.94 | 10.96 | 10.85 | 10.62 | 10.60 | 10.64 | 10.69 | 10.54 | 10.55 | 9.96  | 10.00 | 10.07 | 9.81  | 9.89  | 9.76  | 1.55                  |
| 10              | 210250_x_at    | AF067854  | ADSL               | 0.007280               | 9.04  | 9.15  | 9.22  | 10.03 | 9.76  | 9.94  | 9.27  | 9.26  | 9.60  | 8.94  | 8.84  | 9.08  | 7.67  | 7.69  | 8.13  | 7.25  | 7.60  | 8.08  | 1.14                  |
| 10              | 202144_s_at    | NM_000026 | ADSL               | 0.014948               | 9.65  | 9.80  | 9.81  | 10.69 | 10.31 | 10.77 | 9.96  | 9.90  | 10.37 | 9.63  | 9.51  | 9.80  | 8.37  | 8.23  | 8.72  | 8.03  | 8.23  | 8.79  | 1.22                  |
| 10              | 201485_s_at    | BC004892  | RCN2               | 0.002068               | 9.31  | 9.59  | 9.52  | 10.23 | 9.63  | 10.25 | 9.65  | 9.62  | 10.21 | 9.03  | 8.92  | 9.16  | 7.59  | 7.60  | 7.85  | 7.96  | 8.12  | 8.02  | 1.23                  |
| 10              | 205500_at      | NM_001735 | C5                 | 0.038996               | 8.34  | 8.55  | 8.38  | 8.97  | 8.79  | 9.32  | 8.65  | 8.71  | 9.13  | 8.33  | 8.25  | 8.69  | 7.45  | 6.99  | 7.19  | 7.36  | 7.00  | 7.49  | 1.35                  |
| 10              | 219686_at      | NM_018401 | STK32B             | 0.012486               | 8.24  | 8.44  | 8.65  | 8.61  | 8.40  | 9.07  | 8.12  | 8.09  | 8.41  | 7.90  | 7.87  | 8.06  | 7.20  | 7.27  | 7.38  | 6.84  | 6.84  | 6.96  | 1.18                  |
| 10              | 218653_at      | NM_014252 | SLC25A15           | 0.015114               | 8.80  | 9.02  | 8.93  | 9.11  | 9.08  | 9.34  | 8.68  | 8.80  | 9.04  | 8.54  | 8.57  | 8.59  | 7.99  | 8.09  | 7.99  | 7.58  | 7.75  | 8.07  | 1.14                  |
| 10              | 200810_s_at    | NM_001280 | CIRBP              | 0.000102               | 10.40 | 10.56 | 10.56 | 10.40 | 10.49 | 10.37 | 10.73 | 10.60 | 10.85 | 10.01 | 10.03 | 10.13 | 9.22  | 9.21  | 9.37  | 9.93  | 10.09 | 10.12 | 2.63                  |
| 10              | 212391_x_at    | AI925635  | RPS3A              | 0.031818               | 13.29 | 13.33 | 13.38 | 13.37 | 13.35 | 13.62 | 13.44 | 13.35 | 13.53 | 13.29 | 13.31 | 13.42 | 12.66 | 12.62 | 12.75 | 12.81 | 13.01 | 12.86 | 1.59                  |
| 10              | 225126_at      | BF438352  | MRFR               | 0.030513               | 8.69  | 8.74  | 8.83  | 8.86  | 8.89  | 8.79  | 8.77  | 8.88  | 8.78  | 8.80  | 8.79  | 8.93  | 8.37  | 8.28  | 8.40  | 8.55  | 8.59  | 8.53  | 2.25                  |
| 10              | 212710_at      | AL043774  | CAMSAP1            | 0.014528               | 8.38  | 8.64  | 8.69  | 8.44  | 8.40  | 8.49  | 8.36  | 8.42  | 8.45  | 8.02  | 7.98  | 7.98  | 7.94  | 7.93  | 7.89  | 7.43  | 7.70  | 7.75  | 1.84                  |
| 11              | 211202_s_at    | AF087481  | JARID1B            | 0.020201               | 8.73  | 8.95  | 8.95  | 9.05  | 9.23  | 9.38  | 8.72  | 9.05  | 9.31  | 9.65  | 9.89  | 9.85  | 10.13 | 10.12 | 10.20 | 10.17 | 10.20 | 10.45 | 1.41                  |
| 11              | 209102_s_at    | AF019214  | HBP1               | 0.027086               | 8.74  | 9.11  | 9.00  | 9.20  | 9.47  | 9.53  | 9.17  | 9.24  | 9.53  | 9.85  | 9.94  | 9.99  | 10.11 | 10.24 | 10.41 | 10.15 | 10.50 | 10.41 | 1.26                  |
| 11              | 225414_at      | AL558987  | RNF149             | 0.000133               | 8.37  | 8.52  | 8.52  | 9.03  | 9.09  | 9.19  | 8.95  | 9.11  | 9.41  | 9.84  | 10.00 | 9.91  | 10.23 | 10.16 | 10.33 | 10.22 | 10.26 | 10.51 | 1.08                  |
| 11              | 210592_s_at    | M55580    | SAT                | 0.044962               | 11.01 | 11.39 | 11.36 | 11.74 | 11.50 | 11.98 | 11.51 | 11.42 | 11.81 | 12.01 | 12.14 | 12.17 | 12.49 | 12.47 | 12.50 | 12.59 | 12.56 | 12.71 | 1.43                  |
| 11              | 223070_at      | AF085359  | SELK               | 0.016657               | 8.55  | 8.63  | 8.68  | 9.26  | 9.15  | 9.38  | 9.02  | 8.82  | 9.35  | 9.68  | 9.66  | 9.90  | 9.93  | 10.04 | 10.25 | 9.92  | 10.13 | 9.89  | 1.68                  |
| 11              | 226179_at      | N63920    | SLC25A37           | 0.014830               | 8.79  | 8.63  | 8.62  | 9.30  | 9.47  | 9.49  | 9.19  | 9.39  | 9.77  | 9.46  | 9.66  | 9.50  | 10.32 | 10.49 | 10.54 | 10.23 | 10.37 | 10.80 | 1.55                  |
| 11              | 235144_at      | AA826324  | RASEF              | 0.002460               | 7.85  | 7.85  | 7.72  | 8.50  | 8.46  | 9.19  | 8.48  | 8.52  | 9.28  | 9.17  | 9.22  | 9.07  | 10.22 | 10.34 | 10.58 | 10.82 | 10.84 | 11.15 | 1.21                  |
| 11              | 242335_at      | AA382004  | SLC25A37           | 0.008015               | 6.66  | 6.36  | 6.30  | 7.33  | 7.34  | 7.52  | 7.01  | 7.11  | 7.95  | 7.92  | 7.81  | 7.65  | 8.76  | 8.63  | 9.15  | 9.05  | 9.19  | 9.31  | 1.27                  |
| 11              | 223082_at      | AF230904  | SH3KBP1            | 0.000300               | 10.52 | 10.41 | 10.19 | 10.96 | 10.90 | 11.18 | 10.78 | 10.73 | 11.13 | 11.42 | 11.48 | 11.25 | 12.24 | 12.24 | 12.48 | 12.19 | 12.37 | 12.42 | 1.22                  |
| 11              | 1554168_a_at   | AF542051  | SH3KBP1            | 0.000779               | 9.32  | 9.37  | 8.93  | 10.17 | 10.14 | 10.27 | 9.92  | 9.94  | 10.33 | 10.88 | 10.92 | 10.46 | 11.61 | 11.76 | 11.98 | 11.92 | 11.87 | 12.46 | 1.21                  |
| 11              | 231779_at      | AI246590  | IRAK2              | 0.000003               | 7.25  | 6.98  | 6.94  | 8.31  | 8.62  | 8.60  | 8.36  | 8.51  | 8.93  | 9.85  | 9.77  | 9.34  | 11.06 | 11.00 | 11.23 | 11.00 | 11.04 | 11.32 | 1.03                  |
| 11              | 36711_at       | AL021977  | MAFF               | 0.000000               | 6.99  | 6.60  | 6.83  | 8.95  | 8.61  | 9.01  | 8.92  | 8.98  | 9.69  | 10.51 | 10.6  |       |       |       |       |       |       |       |                       |

| K-Mean<br>Order | Probe<br>Names | Gene<br>Symbol | Adj. p-Value<br>≤0.05, |          |       |       |       |       |       |       |       |       |       |       |       |       |       |       |       |       | K-Means<br>Similarity |       |      |
|-----------------|----------------|----------------|------------------------|----------|-------|-------|-------|-------|-------|-------|-------|-------|-------|-------|-------|-------|-------|-------|-------|-------|-----------------------|-------|------|
|                 |                |                | Bonferroni             | c1       | c2    | c3    | 6h1   | 6h2   | 6h3   | 12h1  | 12h2  | 12h3  | 24h1  | 24h2  | 24h3  | 48h1  | 48h2  | 48h3  | 72h1  | 72h2  | 72h3                  |       |      |
| 11              | 203944_x_at    | NM_007049      | BTN2A1                 | 0.005756 | 7.55  | 7.82  | 7.79  | 7.53  | 7.65  | 7.67  | 7.78  | 7.89  | 8.12  | 8.32  | 8.32  | 8.48  | 8.72  | 8.81  | 9.21  | 9.03  | 9.27                  | 9.38  | 1.02 |
| 11              | 204646_at      | NM_000110      | DPYD                   | 0.002769 | 6.00  | 6.20  | 6.17  | 5.78  | 5.47  | 6.02  | 6.07  | 6.09  | 6.86  | 7.82  | 7.87  | 7.77  | 8.43  | 8.53  | 9.55  | 9.13  | 9.41                  | 9.84  | 1.07 |
| 11              | 202901_x_at    | BC002642       | CTSS                   | 0.011210 | 4.35  | 4.37  | 4.37  | 4.40  | 4.50  | 4.64  | 4.83  | 4.66  | 5.39  | 5.53  | 5.87  | 5.77  | 7.14  | 6.89  | 8.04  | 6.99  | 7.45                  | 8.07  | 0.99 |
| 11              | 201578_at      | NM_005397      | PODXL                  | 0.000667 | 7.62  | 7.78  | 7.61  | 8.03  | 8.04  | 8.21  | 7.99  | 8.18  | 8.43  | 8.50  | 8.51  | 8.39  | 9.22  | 9.29  | 9.39  | 9.37  | 9.57                  | 9.52  | 0.96 |
| 11              | 228812_at      | AI652899       | ---                    | 0.000082 | 6.29  | 6.31  | 6.40  | 6.42  | 6.60  | 7.01  | 6.75  | 6.88  | 7.67  | 8.18  | 8.11  | 8.25  | 9.86  | 9.77  | 10.20 | 10.06 | 10.06                 | 10.67 | 0.74 |
| 11              | 216841_s_at    | X15132         | SOD2                   | 0.000019 | 6.69  | 6.72  | 6.69  | 6.46  | 6.57  | 6.94  | 7.31  | 7.21  | 7.75  | 8.12  | 8.23  | 8.08  | 9.74  | 9.69  | 10.18 | 9.91  | 10.00                 | 10.54 | 0.77 |
| 11              | 203574_at      | NM_005384      | NFIL3                  | 0.000721 | 8.47  | 8.47  | 8.42  | 8.02  | 8.04  | 8.52  | 8.61  | 8.82  | 9.54  | 9.78  | 9.78  | 9.69  | 10.85 | 10.80 | 11.30 | 11.06 | 11.31                 | 11.55 | 0.79 |
| 11              | 222415_at      | BE962679       | MLL3                   | 0.005787 | 7.63  | 7.83  | 7.40  | 7.55  | 7.55  | 8.17  | 7.84  | 7.86  | 8.85  | 8.95  | 9.11  | 9.01  | 10.14 | 10.23 | 10.83 | 10.61 | 10.72                 | 11.10 | 0.85 |
| 11              | 203182_s_at    | NM_003138      | SRPK2                  | 0.012675 | 9.07  | 9.04  | 8.82  | 8.98  | 8.69  | 9.33  | 8.88  | 9.00  | 9.81  | 10.05 | 10.04 | 9.89  | 10.85 | 10.82 | 11.28 | 11.19 | 11.27                 | 11.43 | 1.03 |
| 11              | 203563_at      | NM_021638      | AFAP                   | 0.003388 | 6.49  | 6.35  | 6.52  | 6.33  | 6.24  | 6.79  | 6.50  | 6.59  | 7.38  | 7.45  | 7.76  | 7.54  | 8.69  | 8.54  | 9.22  | 9.07  | 9.09                  | 9.25  | 0.95 |
| 11              | 205100_at      | NM_005110      | GFPT2                  | 0.001660 | 8.37  | 8.67  | 8.72  | 8.91  | 8.88  | 9.08  | 8.74  | 8.95  | 9.30  | 9.31  | 9.36  | 9.40  | 10.15 | 10.18 | 10.37 | 10.17 | 10.18                 | 10.27 | 1.08 |
| 11              | 235242_at      | BE739287       | ---                    | 0.001410 | 7.66  | 7.77  | 7.80  | 8.35  | 8.21  | 8.57  | 7.93  | 8.37  | 8.83  | 9.19  | 9.47  | 9.47  | 10.74 | 10.72 | 11.27 | 10.69 | 11.11                 | 11.68 | 1.00 |
| 11              | 212642_s_at    | AL023584       | HIVEP2                 | 0.002050 | 7.77  | 8.21  | 8.10  | 8.28  | 8.38  | 8.60  | 8.26  | 8.48  | 8.79  | 8.99  | 9.24  | 9.02  | 10.06 | 10.14 | 10.54 | 10.23 | 10.25                 | 10.75 | 1.01 |
| 11              | 204470_at      | NM_001511      | CXCL1                  | 0.000085 | 8.72  | 8.82  | 8.75  | 8.84  | 8.95  | 9.16  | 8.88  | 8.92  | 9.45  | 10.20 | 10.28 | 10.24 | 11.48 | 11.45 | 12.00 | 11.44 | 11.50                 | 12.02 | 0.97 |
| 11              | 242727_at      | BG032269       | ARL8                   | 0.000058 | 5.60  | 5.39  | 5.27  | 5.83  | 5.55  | 6.19  | 5.90  | 6.42  | 7.17  | 7.65  | 7.66  | 7.41  | 9.17  | 9.02  | 9.56  | 10.31 | 10.11                 | 10.36 | 0.79 |
| 11              | 226351_at      | AK021577       | NSUN4                  | 0.020976 | 6.94  | 7.03  | 7.13  | 7.03  | 7.08  | 7.15  | 7.03  | 7.14  | 7.08  | 7.42  | 7.51  | 7.53  | 7.65  | 7.64  | 7.56  | 7.66  | 7.79                  | 8.02  | 1.49 |
| 11              | 207980_s_at    | NM_006079      | CTSED2                 | 0.000127 | 5.75  | 6.42  | 6.27  | 6.47  | 6.81  | 6.03  | 6.79  | 7.05  | 6.52  | 8.92  | 8.93  | 9.84  | 10.52 | 10.68 | 9.99  | 11.50 | 11.34                 | 10.67 | 1.30 |
| 11              | 221050_s_at    | NM_019096      | GTPBP2                 | 0.000696 | 7.37  | 7.59  | 7.66  | 7.92  | 8.15  | 7.83  | 8.03  | 8.18  | 7.91  | 8.54  | 8.76  | 8.91  | 8.96  | 9.14  | 9.06  | 9.21  | 9.45                  | 9.52  | 1.22 |
| 11              | 218088_s_at    | NM_022157      | RRAGC                  | 0.003141 | 8.76  | 8.87  | 8.86  | 9.25  | 9.13  | 9.01  | 9.20  | 9.01  | 9.20  | 9.37  | 9.59  | 9.36  | 9.56  | 9.50  | 9.56  | 9.94  | 10.12                 | 9.95  | 1.69 |
| 11              | 219501_at      | NM_017993      | FLJ10094               | 0.001313 | 5.80  | 5.84  | 5.77  | 5.81  | 5.83  | 5.91  | 6.11  | 6.03  | 6.27  | 6.46  | 6.54  | 6.38  | 6.34  | 6.35  | 6.66  | 7.06  | 7.29                  | 7.11  | 1.67 |
| 11              | 205932_s_at    | NM_002448      | MSX1                   | 0.014586 | 8.33  | 8.02  | 7.99  | 8.28  | 8.37  | 8.31  | 8.64  | 8.54  | 8.63  | 8.85  | 8.61  | 8.73  | 8.87  | 8.93  | 9.22  | 9.41  | 9.73                  | 9.48  | 1.52 |
| 11              | 213932_x_at    | AI923492       | HLA-A                  | 0.000035 | 10.71 | 11.04 | 10.97 | 10.65 | 10.77 | 10.23 | 11.28 | 11.29 | 11.01 | 11.85 | 12.02 | 11.94 | 12.50 | 12.57 | 12.57 | 12.99 | 12.92                 | 12.99 | 1.29 |
| 11              | 209403_at      | AL136860       | TBC1D3 /// TBC1D3C     | 0.000425 | 9.62  | 9.82  | 9.68  | 9.37  | 9.45  | 9.26  | 9.93  | 9.84  | 9.78  | 10.08 | 10.30 | 10.26 | 10.47 | 10.56 | 10.64 | 10.92 | 10.99                 | 10.66 | 1.54 |
| 11              | 209383_at      | BC003637       | DDIT3                  | 0.000004 | 9.12  | 8.95  | 8.74  | 8.72  | 8.81  | 8.65  | 9.33  | 9.44  | 9.23  | 10.24 | 10.27 | 10.25 | 10.49 | 10.63 | 10.35 | 10.86 | 11.12                 | 11.01 | 1.24 |
| 11              | 220266_s_at    | NM_004235      | KLF4                   | 0.000209 | 7.32  | 7.29  | 7.02  | 7.46  | 7.21  | 7.12  | 8.36  | 8.36  | 7.71  | 10.17 | 10.19 | 10.57 | 11.37 | 11.62 | 11.12 | 12.14 | 11.89                 | 10.73 | 1.29 |
| 11              | 210465_s_at    | BC002646       | JUN                    | 0.008306 | 7.67  | 7.51  | 7.45  | 7.95  | 7.62  | 7.39  | 8.89  | 8.68  | 7.89  | 9.86  | 9.42  | 9.82  | 10.37 | 10.56 | 10.12 | 11.28 | 11.15                 | 10.21 | 1.43 |
| 11              | 219610_at      | NM_022448      | RGNEF                  | 0.010725 | 8.36  | 8.51  | 8.53  | 8.48  | 8.47  | 8.24  | 8.60  | 8.71  | 8.73  | 8.94  | 9.04  | 8.99  | 9.34  | 9.38  | 9.22  | 9.14  | 9.50                  | 9.37  | 1.22 |
| 11              | 225803_at      | AW006123       | FBXO32                 | 0.009379 | 6.97  | 6.83  | 6.89  | 7.08  | 7.03  | 7.11  | 7.29  | 7.14  | 7.45  | 7.72  | 7.50  | 7.46  | 7.94  | 8.00  | 7.75  | 7.77  | 7.76                  | 7.81  | 1.23 |
| 11              | 209706_at      | AF247704       | NKX3-1                 | 0.002108 | 7.63  | 7.45  | 7.32  | 8.24  | 7.72  | 8.10  | 8.51  | 8.45  | 8.80  | 9.01  | 8.88  | 8.41  | 10.02 | 9.83  | 10.19 | 9.70  | 10.13                 | 9.71  | 1.13 |
| 11              | 231035_s_at    | AI697976       | OTUD1                  | 0.014849 | 7.08  | 6.75  | 6.74  | 7.17  | 7.13  | 7.19  | 7.74  | 7.70  | 8.12  | 9.75  | 9.45  | 8.17  | 10.86 | 10.83 | 11.30 | 11.24 | 11.41                 | 9.95  | 1.21 |
| 11              | 214056_at      | BF981280       | MCL1                   | 0.004741 | 6.56  | 6.17  | 6.54  | 6.59  | 6.25  | 6.76  | 7.08  | 7.15  | 7.11  | 7.71  | 7.67  | 7.04  | 8.48  | 8.55  | 8.78  | 8.52  | 8.76                  | 8.31  | 1.13 |
| 11              | 213988_s_at    | BE971383       | SAT                    | 0.005513 | 9.97  | 10.21 | 9.93  | 10.31 | 9.99  | 10.64 | 10.73 | 10.38 | 10.91 | 11.24 | 11.04 | 11.18 | 11.82 | 11.76 | 12.04 | 11.85 | 12.06                 | 12.11 | 0.69 |
| 11              | 230183_at      | AW189467       | ---                    | 0.014554 | 5.73  | 6.25  | 5.96  | 6.91  | 6.84  | 7.50  | 7.38  | 7.34  | 8.47  | 8.18  | 8.54  | 8.19  | 9.92  | 9.90  | 10.29 | 9.00  | 9.57                  | 10.20 | 1.09 |
| 11              | 226908_at      | AI627704       | LRIG3                  | 0.009096 | 5.40  | 5.72  | 5.61  | 5.46  | 5.51  | 6.51  | 6.52  | 6.34  | 7.48  | 7.48  | 7.53  | 7.41  | 9.08  | 9.13  | 9.85  | 8.60  | 8.72                  | 8.99  | 0.97 |
| 11              | 204715_at      | NM_015368      | PANX1                  | 0.022931 | 5.94  | 6.15  | 6.12  | 6.17  | 6.48  | 6.55  | 6.28  | 6.54  | 7.02  | 7.07  | 7.03  | 7.15  | 7.65  | 7.59  | 7.72  | 7.63  | 7.62                  | 7.89  | 0.82 |
| 11              | 225688_s_at    | AK025444       | PHLDB2                 | 0.028596 | 9.29  | 9.70  | 9.71  | 9.77  | 9.78  | 10.36 | 10.04 | 10.25 | 10.92 | 11.00 | 11.18 | 11.04 | 11.82 | 11.82 | 12.23 | 11.71 | 11.81                 | 12.22 | 0.76 |
| 11              | 203810_at      | BG252490       | DNAJB4                 | 0.003543 | 7.35  | 7.38  | 7.12  | 7.71  | 7.48  | 8.24  | 7.83  | 8.03  | 8.83  | 9.08  | 9.08  | 9.11  | 10.29 | 10.28 | 10.83 | 10.09 | 10.30                 | 10.60 | 0.73 |
| 11              | 213000_at      | AP000693       | MORC3                  | 0.041526 | 6.57  | 6.43  | 6.44  | 6.89  | 6.90  | 7.57  | 7.04  | 7.25  | 8.11  | 8.08  | 8.23  | 8.01  | 9.14  | 9.20  | 9.80  | 9.32  | 9.30                  | 10.15 | 0.88 |
| 11              | 209034_at      | AF279899       | PNRC1                  | 0.002845 | 10.60 | 10.74 | 10.71 | 10.93 | 10.80 | 11.05 | 10.96 | 10.84 | 11.29 | 11.56 | 11.59 | 11.57 | 12.09 | 12.05 | 12.32 | 12.28 | 12.36                 | 11.96 | 0.93 |
| 11              | 1554997_a_at   | AY151286       | PTGS2                  | 0.000026 | 6.24  | 6.63  | 6.48  | 6.88  | 6.91  | 7.05  | 7.45  | 7.20  | 8.10  | 8.62  | 8.48  | 9.09  | 10.64 | 10.67 | 10.74 | 10.90 | 10.71                 | 10.18 | 0.81 |
| 11              | 211506_s_at    | AF043337       | IL8                    | 0.011068 | 6.58  | 6.69  | 6.82  | 6.90  | 7.34  | 7.50  | 8.06  | 7.68  | 8.39  | 9.48  | 9.09  | 10.58 | 11.06 | 11.37 | 11.34 | 11.54 | 11.80                 | 10.11 | 1.15 |
| 11              | 204601_at      | NM_014664      | N4BP1                  | 0.000128 | 7.30  | 7.45  | 7.28  | 7.55  | 7.35  | 7.47  | 7.95  | 8.00  | 8.22  | 8.50  | 8.40  | 8.58  | 8.77  | 8.97  | 9.10  | 9.10  | 9.15                  | 8.83  | 0.77 |
| 11              | 200797_s_at    | AI275690       | MCL1                   | 0.000114 | 9.33  | 9.82  | 9.62  | 9.94  | 9.91  | 9.71  | 10.36 | 10.30 | 10.43 | 10.69 | 10.70 | 10.82 | 11.08 | 11.08 | 11.26 | 11.36 | 11.51                 | 11.47 | 0.80 |
| 11              | 200798_x_at    | NM_021960      | MCL1                   | 0.006051 | 7.45  | 8.25  | 8.35  | 8.20  | 7.94  | 8.37  | 8.79  | 8.94  | 9.47  | 9.53  | 9.73  | 10.14 | 10.36 | 10.44 | 10.65 | 10.86 | 10.82                 | 10.84 | 0.82 |
| 11              | 209841_s_at    | AL442092       | LRRN3                  | 0.000145 | 5.63  | 5.57  | 5.68  | 5.70  | 5.80  | 5.58  | 7.16  | 7.44  | 8.09  | 8.69  | 8.58  | 8.38  | 9.33  | 8.91  | 9.79  | 9.64  | 9.98                  | 10.61 | 0.82 |
| 11              | 209840_s_at    | AI221950       | LRRN3                  | 0.000017 | 7.24  | 7.35  | 7.20  | 7.26  | 7.37  | 7.13  | 8.52  | 8.69  | 9.29  | 9.91  | 9.83  | 9.40  | 10.51 | 11.08 | 10.98 | 11.28 | 11.14                 | 0.67  |      |
| 11              | 204897_at      | AA897516       | PTGER4                 | 0.000031 | 5.55  | 5.35  | 5.27  | 5.29  | 5.57  | 5.61  | 6.78  | 7.30  | 8.17  | 8.65  | 8.57  | 8.38  | 9.92  | 9.80  | 10.37 | 10.08 | 10.35                 | 10.64 | 0.55 |
| 11              | 223217_s_at    | BE646573       | NFKBIZ                 | 0.000000 | 8.33  | 8.30  | 8.30  | 8.79  | 8.46  | 8.96  | 9.81  | 9.80  | 10.06 | 10.72 | 11.05 | 10.58 | 12.57 | 12.57 | 12.60 | 12.66 | 12.79                 | 12.66 | 0.51 |
| 11              | 223218_s_at    | AB037925       | NFKBIZ                 | 0.000005 | 7.93  | 7.70  | 7.81  | 8.52  | 8.19  | 8.71  | 9.69  | 9.78  | 10.65 | 10.83 | 11.08 | 10.60 | 12.51 | 12.37 | 12.73 | 12.51 | 12.63                 | 12.68 | 0.54 |
| 11              | 228964_at      | AI692659       | PRDM1                  | 0.000026 | 7.17  | 6.86  | 6.84  | 6.86  | 7.21  | 6.93  | 7.75  | 7.79  | 8.11  | 8.37  | 8.34  | 8.17  | 9.18  | 9.16  | 9.31  | 8.98  | 9.21                  | 9.28  | 0.76 |
| 11              | 216020_at      | AL080107       | IFIH1                  | 0.000008 | 5.42  | 5.18  | 5.28  | 5.36  | 5.21  | 5.54  | 6.67  | 6.71  | 7.41  | 8.09  | 7.67  | 7.91  | 9.40  | 9.40  | 9.85  | 9.30  | 9.42                  |       |      |

| K-Mean<br>Order | Probe<br>Names | Gene<br>Symbol | Adj. p-Value<br>≤0.05,<br>Bonferroni | K-Means<br>Similarity |       |       |       |       |       |       |       |       |       |       |       |       |       |       |       |       |       |       |
|-----------------|----------------|----------------|--------------------------------------|-----------------------|-------|-------|-------|-------|-------|-------|-------|-------|-------|-------|-------|-------|-------|-------|-------|-------|-------|-------|
|                 |                |                |                                      | c1                    | c2    | c3    | 6h1   | 6h2   | 6h3   | 12h1  | 12h2  | 12h3  | 24h1  | 24h2  | 24h3  | 48h1  | 48h2  | 48h3  | 72h1  | 72h2  | 72h3  |       |
| 11              | 207767_s_at    | NM_001965      | EGR4                                 | 0.000004              | 7.07  | 6.89  | 6.81  | 6.98  | 6.74  | 6.90  | 7.63  | 7.86  | 7.58  | 8.57  | 8.80  | 8.67  | 9.88  | 9.73  | 9.37  | 9.72  | 9.88  | 9.47  |
| 11              | 1553713_a_at   | NM_144593      | RHEB1                                | 0.000000              | 7.90  | 7.79  | 7.84  | 7.86  | 7.77  | 7.62  | 8.70  | 8.56  | 8.51  | 9.27  | 9.41  | 9.43  | 10.19 | 10.38 | 10.10 | 10.32 | 10.49 | 10.18 |
| 11              | 211122_s_at    | AF002985       | CXCL11                               | 0.000000              | 4.30  | 4.53  | 4.45  | 4.44  | 4.51  | 4.46  | 5.60  | 5.41  | 6.12  | 8.28  | 8.08  | 8.65  | 10.35 | 10.45 | 10.71 | 10.70 | 10.60 | 10.45 |
| 11              | 1557558_s_at   | BE675718       | MATN1                                | 0.000000              | 5.82  | 5.63  | 5.66  | 5.62  | 5.45  | 5.67  | 6.27  | 6.25  | 6.25  | 7.36  | 7.13  | 7.48  | 8.55  | 8.54  | 8.46  | 8.72  | 8.42  | 8.59  |
| 11              | 210416_s_at    | BC004207       | CHEK2                                | 0.000001              | 7.04  | 7.38  | 7.07  | 6.72  | 6.66  | 6.52  | 7.84  | 7.56  | 7.78  | 8.77  | 9.07  | 9.37  | 10.53 | 10.78 | 10.89 | 10.93 | 10.96 | 11.46 |
| 11              | 1554438_at     | BC018764       | KIAA1217                             | 0.000010              | 5.26  | 5.46  | 5.22  | 5.43  | 5.30  | 5.08  | 5.84  | 5.60  | 5.72  | 6.44  | 6.23  | 6.32  | 7.02  | 7.09  | 7.12  | 7.04  | 7.27  | 7.22  |
| 11              | 215223_s_at    | W46388         | SOD2                                 | 0.000003              | 7.83  | 8.26  | 8.19  | 8.02  | 8.33  | 8.03  | 8.76  | 8.71  | 8.95  | 9.40  | 9.42  | 9.42  | 10.45 | 10.48 | 10.78 | 10.72 | 10.80 | 10.67 |
| 11              | 236595_at      | AA776458       | MGC4677                              | 0.000622              | 6.62  | 6.27  | 6.58  | 6.45  | 6.55  | 6.29  | 7.26  | 6.81  | 7.05  | 7.44  | 7.32  | 7.36  | 8.27  | 8.35  | 8.19  | 8.05  | 8.29  | 8.55  |
| 11              | 202748_at      | NM_004120      | GBP2                                 | 0.000320              | 8.38  | 8.16  | 7.97  | 7.95  | 8.23  | 7.91  | 8.84  | 8.79  | 8.67  | 9.49  | 9.21  | 9.23  | 9.84  | 9.88  | 10.12 | 9.78  | 10.04 | 10.19 |
| 11              | 227200_at      | AI871408       | ---                                  | 0.000174              | 8.12  | 8.51  | 8.16  | 8.47  | 8.43  | 9.03  | 9.53  | 9.78  | 10.35 | 10.64 | 10.71 | 10.68 | 11.51 | 11.44 | 11.76 | 11.11 | 11.31 | 11.47 |
| 11              | 225706_at      | AI761989       | GLCC1                                | 0.028506              | 7.42  | 7.26  | 7.41  | 7.32  | 6.89  | 7.18  | 8.09  | 8.27  | 8.83  | 9.09  | 9.53  | 8.83  | 9.90  | 9.65  | 9.92  | 9.32  | 9.67  | 10.50 |
| 11              | 202313_at      | NM_002717      | PPP2R2A                              | 0.021592              | 9.28  | 9.66  | 9.51  | 9.51  | 9.25  | 9.62  | 9.84  | 9.85  | 10.06 | 10.14 | 10.19 | 10.23 | 10.33 | 10.28 | 10.49 | 10.64 | 10.71 | 10.95 |
| 11              | 228953_at      | AI023634       | KIAA1971                             | 0.000019              | 7.02  | 7.49  | 7.37  | 7.23  | 7.30  | 7.44  | 8.29  | 8.31  | 8.42  | 8.83  | 8.76  | 9.01  | 9.37  | 9.48  | 9.58  | 9.95  | 10.02 | 10.49 |
| 11              | 226725_at      | AI435399       | ---                                  | 0.001967              | 7.97  | 8.25  | 8.20  | 8.08  | 7.70  | 8.28  | 9.41  | 8.97  | 9.75  | 9.52  | 9.78  | 9.81  | 9.95  | 9.88  | 10.33 | 10.57 | 10.83 | 10.88 |
| 11              | 204286_s_at    | NM_021127      | PMAIP1                               | 0.000023              | 7.85  | 8.02  | 7.81  | 7.67  | 7.45  | 8.39  | 9.97  | 10.00 | 10.83 | 10.92 | 11.00 | 11.00 | 11.84 | 11.79 | 12.27 | 12.43 | 12.37 | 12.61 |
| 11              | 218986_s_at    | NM_017631      | FLJ20035                             | 0.000011              | 5.83  | 5.88  | 5.81  | 5.46  | 5.56  | 6.23  | 8.08  | 8.05  | 8.96  | 9.35  | 9.57  | 9.59  | 10.19 | 10.14 | 10.87 | 11.07 | 11.28 | 11.62 |
| 11              | 201891_s_at    | NM_004048      | B2M                                  | 0.001469              | 11.90 | 12.07 | 12.12 | 11.95 | 11.96 | 12.22 | 12.63 | 12.46 | 12.84 | 12.88 | 12.99 | 13.07 | 13.10 | 13.10 | 13.31 | 13.39 | 13.39 | 13.55 |
| 11              | 202643_s_at    | AI738896       | TNFAIP3                              | 0.000000              | 6.39  | 5.85  | 6.11  | 6.62  | 6.82  | 6.74  | 9.06  | 9.32  | 9.78  | 10.58 | 10.43 | 10.70 | 12.08 | 12.15 | 12.33 | 12.50 | 12.55 | 12.28 |
| 11              | 207768_at      | NM_001965      | EGR4                                 | 0.000000              | 5.09  | 4.71  | 4.85  | 4.74  | 5.01  | 4.83  | 6.96  | 7.37  | 7.70  | 9.49  | 9.36  | 9.20  | 10.69 | 10.57 | 10.90 | 10.92 | 11.25 | 11.13 |
| 11              | 206932_at      | NM_003956      | CH25H                                | 0.000000              | 5.48  | 4.99  | 5.28  | 4.70  | 5.02  | 5.42  | 7.26  | 7.41  | 8.09  | 9.74  | 9.47  | 9.54  | 10.69 | 10.61 | 10.94 | 11.07 | 11.20 | 11.07 |
| 11              | 202672_s_at    | NM_001674      | ATF3                                 | 0.000000              | 8.07  | 7.95  | 7.91  | 8.03  | 7.99  | 8.28  | 9.81  | 10.06 | 10.04 | 11.57 | 11.66 | 11.73 | 12.51 | 12.62 | 12.68 | 13.28 | 13.04 | 12.97 |
| 11              | 202357_s_at    | NM_001710      | BF                                   | 0.000000              | 6.86  | 7.07  | 6.63  | 6.26  | 6.83  | 6.43  | 8.60  | 8.59  | 8.60  | 9.36  | 9.49  | 9.58  | 10.57 | 10.60 | 10.85 | 10.79 | 10.82 | 11.29 |
| 11              | 221841_s_at    | BF514079       | KLF4                                 | 0.000000              | 8.52  | 8.65  | 8.59  | 9.18  | 9.07  | 9.58  | 10.41 | 10.60 | 11.11 | 11.97 | 12.19 | 12.10 | 12.70 | 12.72 | 12.72 | 13.17 | 13.06 | 13.40 |
| 11              | 221014_at      | NM_020119      | ZC3HAV1                              | 0.000000              | 6.82  | 6.82  | 6.97  | 7.41  | 7.41  | 7.89  | 9.53  | 9.91  | 10.19 | 10.83 | 10.84 | 10.57 | 11.70 | 11.64 | 11.87 | 12.47 | 12.16 | 12.72 |
| 11              | 221778_at      | BE217882       | KIAA1718                             | 0.000153              | 7.08  | 7.56  | 7.25  | 7.49  | 7.58  | 7.34  | 8.06  | 8.09  | 8.20  | 8.21  | 8.33  | 8.39  | 9.04  | 9.11  | 8.90  | 8.78  | 8.83  | 8.85  |
| 11              | 202859_x_at    | NM_000584      | IL8                                  | 0.000211              | 9.15  | 8.65  | 8.72  | 9.71  | 10.29 | 10.77 | 10.94 | 11.04 | 11.86 | 12.26 | 12.31 | 12.24 | 13.03 | 13.00 | 13.44 | 13.37 | 13.40 | 13.46 |
| 11              | 231807_at      | AL157473       | KIAA1217                             | 0.019412              | 5.90  | 5.74  | 5.37  | 6.31  | 6.33  | 6.43  | 6.91  | 6.70  | 7.43  | 7.53  | 7.41  | 7.60  | 7.93  | 8.15  | 8.50  | 7.75  | 8.02  | 8.55  |
| 11              | 224973_at      | AL078599       | FAM46A                               | 0.036340              | 6.01  | 5.91  | 5.77  | 6.20  | 6.12  | 6.31  | 6.99  | 6.94  | 7.69  | 7.72  | 7.56  | 7.73  | 7.86  | 7.94  | 8.51  | 8.06  | 8.32  | 9.00  |
| 11              | 221766_s_at    | AW246673       | FAM46A                               | 0.022794              | 7.69  | 7.68  | 7.58  | 8.12  | 8.34  | 8.78  | 9.45  | 9.09  | 10.00 | 10.02 | 9.61  | 10.00 | 10.39 | 10.17 | 11.10 | 10.35 | 10.87 | 10.96 |
| 11              | 225956_at      | AL565238       | LOC153222                            | 0.020583              | 6.93  | 7.23  | 6.53  | 7.07  | 7.23  | 8.01  | 8.23  | 8.06  | 9.20  | 8.96  | 9.17  | 8.81  | 9.66  | 9.55  | 10.12 | 10.35 | 10.52 | 10.44 |
| 11              | 32069_at       | AB014515       | N4BP1                                | 0.001828              | 7.20  | 7.39  | 7.20  | 7.67  | 7.44  | 8.09  | 8.62  | 8.39  | 9.20  | 9.33  | 9.38  | 9.21  | 10.06 | 9.85  | 10.57 | 10.09 | 10.46 | 10.57 |
| 11              | 205191_at      | NM_006915      | RP2                                  | 0.034011              | 5.88  | 6.16  | 6.15  | 6.64  | 6.50  | 6.99  | 7.20  | 7.19  | 8.23  | 7.74  | 7.75  | 7.64  | 8.69  | 8.56  | 9.17  | 8.90  | 8.84  | 9.59  |
| 11              | 212756_s_at    | AI761518       | UBR2                                 | 0.044000              | 7.35  | 7.43  | 7.39  | 7.57  | 7.52  | 7.59  | 7.72  | 7.74  | 7.99  | 8.02  | 8.11  | 8.17  | 8.02  | 8.24  | 8.16  | 8.19  | 8.38  | 8.57  |
| 11              | 226109_at      | AK023825       | C21orf91                             | 0.003018              | 7.43  | 7.88  | 7.52  | 7.56  | 7.60  | 7.99  | 8.13  | 7.95  | 8.69  | 8.85  | 8.83  | 8.65  | 9.67  | 9.54  | 9.77  | 9.86  | 10.32 | 10.46 |
| 11              | 228904_at      | AW510657       | ---                                  | 0.003416              | 7.78  | 7.99  | 7.82  | 7.70  | 7.87  | 8.21  | 8.32  | 8.58  | 8.97  | 8.92  | 8.89  | 8.80  | 9.65  | 9.64  | 10.21 | 10.12 | 10.16 | 10.48 |
| 11              | 226117_at      | AA195074       | TIFA                                 | 0.024091              | 7.49  | 7.57  | 7.67  | 7.30  | 7.66  | 8.20  | 7.86  | 8.05  | 8.81  | 8.66  | 8.64  | 8.57  | 9.72  | 9.55  | 10.08 | 10.00 | 10.08 | 10.25 |
| 11              | 210002_at      | D87811         | GATA6                                | 0.000231              | 6.64  | 6.61  | 6.63  | 6.38  | 6.18  | 6.77  | 7.48  | 7.66  | 8.52  | 8.57  | 8.41  | 8.31  | 9.51  | 9.26  | 9.88  | 10.24 | 10.47 | 10.59 |
| 11              | 203765_at      | NM_001219      | GCA                                  | 0.000126              | 7.62  | 7.71  | 7.75  | 7.11  | 7.29  | 7.86  | 8.44  | 8.22  | 8.94  | 8.84  | 9.01  | 8.81  | 10.00 | 10.04 | 10.35 | 10.65 | 10.70 | 10.73 |
| 11              | 227195_at      | AA603467       | ZNF503                               | 0.013163              | 8.68  | 8.87  | 8.59  | 8.54  | 8.71  | 9.21  | 9.52  | 9.32  | 10.08 | 10.04 | 9.90  | 9.80  | 10.58 | 10.36 | 10.97 | 11.04 | 11.19 | 11.36 |
| 11              | 209604_s_at    | BC003070       | GATA3                                | 0.000881              | 7.72  | 7.37  | 7.27  | 7.58  | 7.64  | 7.61  | 8.16  | 8.41  | 8.79  | 8.82  | 8.85  | 8.68  | 9.09  | 9.29  | 9.70  | 9.92  | 10.22 | 10.11 |
| 11              | 232311_at      | AU147899       | ---                                  | 0.000029              | 7.00  | 7.09  | 7.01  | 7.25  | 7.20  | 7.26  | 7.99  | 8.00  | 8.40  | 8.05  | 8.18  | 7.75  | 9.14  | 8.77  | 9.20  | 9.77  | 10.03 | 9.83  |
| 11              | 201693_s_at    | AV733950       | EGR1                                 | 0.000013              | 6.27  | 6.37  | 6.59  | 6.32  | 6.63  | 6.47  | 7.83  | 8.26  | 8.61  | 9.16  | 8.70  | 8.55  | 10.91 | 10.31 | 10.83 | 11.79 | 12.21 | 11.27 |
| 11              | 1563075_s_at   | AF143866       | ---                                  | 0.000183              | 5.63  | 5.07  | 5.18  | 5.79  | 5.57  | 5.61  | 7.64  | 7.92  | 8.70  | 8.17  | 9.09  | 8.24  | 10.11 | 9.93  | 10.42 | 10.68 | 10.52 | 11.67 |
| 11              | 1563076_x_at   | AF143866       | ---                                  | 0.000005              | 5.31  | 4.98  | 4.98  | 5.62  | 5.41  | 5.66  | 7.49  | 7.68  | 8.06  | 7.58  | 8.41  | 7.97  | 9.69  | 9.72  | 10.17 | 10.17 | 10.20 | 10.87 |
| 11              | 214059_at      | BE049439       | IFI44                                | 0.000518              | 6.19  | 6.01  | 6.27  | 6.36  | 6.40  | 6.39  | 7.66  | 7.84  | 8.11  | 7.70  | 8.12  | 8.45  | 8.94  | 9.27  | 9.42  | 9.30  | 9.02  | 9.89  |
| 11              | 242907_at      | BF509371       | GBP2                                 | 0.000278              | 5.10  | 4.91  | 4.91  | 5.28  | 5.10  | 5.15  | 7.10  | 6.72  | 7.97  | 7.69  | 7.47  | 7.28  | 9.48  | 9.36  | 10.30 | 9.61  | 10.35 | 10.83 |
| 11              | 1565913_at     | H59257         | ZC3HAV1                              | 0.000001              | 5.50  | 5.81  | 5.81  | 5.81  | 5.81  | 5.79  | 8.30  | 7.76  | 8.83  | 8.35  | 8.87  | 8.31  | 10.71 | 10.85 | 10.53 | 11.70 | 11.33 | 11.69 |
| 11              | 225634_at      | BG533558       | ZC3HAV1                              | 0.000009              | 8.95  | 9.66  | 9.65  | 9.42  | 9.57  | 9.63  | 11.15 | 11.17 | 11.43 | 11.08 | 11.25 | 11.50 | 12.11 | 12.12 | 12.07 | 13.07 | 13.01 | 13.26 |
| 11              | 213051_at      | AI133727       | ZC3HAV1                              | 0.000018              | 9.50  | 10.14 | 9.91  | 10.27 | 10.21 | 10.65 | 11.89 | 11.93 | 12.44 | 12.01 | 12.19 | 12.28 | 12.94 | 12.88 | 13.08 | 13.55 | 13.75 | 13.88 |
| 11              | 221978_at      | BE138825       | HLA-F                                | 0.007388              | 6.42  | 6.35  | 6.59  | 6.35  | 6.72  | 6.64  | 7.29  | 7.09  | 7.18  | 7.35  | 7.37  | 7.52  | 7.60  | 7.65  | 8.00  | 8.10  | 7.99  | 8.46  |
| 11              | 209602_s_at    | AI796169       | GATA3                                | 0.024016              | 4.75  | 4.66  | 4.33  | 4.59  | 4.57  | 4.56  | 5.10  | 5.13  | 5.72  | 5.35  | 5.45  | 5.41  | 6.12  | 5.76  | 6.34  | 6.53  | 6.59  | 7.10  |
| 11              | 221905_at      | BF516433       | CYLD                                 | 0.025738              | 6.91  | 7.02  | 6.62  | 6.85  | 6.52  | 7.01  | 7.44  | 7.47  | 8.28  | 7.74  | 8.27  | 7.77  | 8.82  | 8.80  | 9.08  | 9.39  | 9.33  | 10.10 |
| 11              | 201340_s_at    | AF010314       | ENC1                                 | 0.026102              | 8.50  | 8.92  | 8.51  | 8.14  | 8.13  | 8.50  | 9.61  | 8.93  | 9.51  | 9.67  | 9.29  | 9.24  | 10.24 |       |       |       |       |       |

| K-Mean<br>Order | Probe<br>Names | Gene<br>GBiD<br>Symbol | Adj. p-Value<br>≤0.05, |          |      |      |      |      |      |       |      |      |       |       |       |       |       |       |       |       | K-Means<br>Similarity |       |      |
|-----------------|----------------|------------------------|------------------------|----------|------|------|------|------|------|-------|------|------|-------|-------|-------|-------|-------|-------|-------|-------|-----------------------|-------|------|
|                 |                |                        | Bonferroni             | c1       | c2   | c3   | 6h1  | 6h2  | 6h3  | 12h1  | 12h2 | 12h3 | 24h1  | 24h2  | 24h3  | 48h1  | 48h2  | 48h3  | 72h1  | 72h2  | 72h3                  |       |      |
| 11              | 232617_at      | AK024855               | CTSS                   | 0.000476 | 7.41 | 7.33 | 7.13 | 7.69 | 7.59 | 7.74  | 8.17 | 8.00 | 8.17  | 8.46  | 8.60  | 8.49  | 9.33  | 9.25  | 9.52  | 8.69  | 8.98                  | 9.31  | 1.12 |
| 11              | 217028_at      | AJ224869               | CXCR4                  | 0.003233 | 5.53 | 5.50 | 5.60 | 5.33 | 5.66 | 5.63  | 6.41 | 6.55 | 7.41  | 8.19  | 8.08  | 7.96  | 9.23  | 9.01  | 9.83  | 8.25  | 8.60                  | 9.50  | 1.05 |
| 11              | 212561_at      | AA349595               | RAB6IP1                | 0.000318 | 8.91 | 9.13 | 9.16 | 9.33 | 9.39 | 9.50  | 9.78 | 9.65 | 10.03 | 10.49 | 10.55 | 10.69 | 10.91 | 10.91 | 11.27 | 10.70 | 10.75                 | 11.04 | 1.01 |
| 11              | 206133_at      | NM_017523              | BIRC4BP                | 0.000320 | 6.82 | 6.61 | 6.80 | 6.84 | 6.91 | 6.99  | 7.96 | 7.58 | 8.06  | 8.70  | 8.72  | 8.92  | 9.43  | 9.25  | 9.90  | 9.17  | 9.12                  | 9.77  | 0.92 |
| 11              | 226847_at      | BF438173               | FST                    | 0.007603 | 6.29 | 6.16 | 6.04 | 6.47 | 6.19 | 7.00  | 6.94 | 7.40 | 8.36  | 8.80  | 9.07  | 8.64  | 9.75  | 9.63  | 10.38 | 9.23  | 9.25                  | 9.58  | 1.07 |
| 11              | 205003_at      | NM_014705              | DOCK4                  | 0.009337 | 6.57 | 6.77 | 6.56 | 7.09 | 7.14 | 7.26  | 7.37 | 7.60 | 8.25  | 8.68  | 9.02  | 8.89  | 9.62  | 9.65  | 10.00 | 8.73  | 8.86                  | 9.77  | 1.30 |
| 11              | 212612_at      | D31888                 | RCOR1                  | 0.042754 | 7.90 | 8.53 | 8.45 | 7.86 | 7.80 | 8.31  | 8.46 | 8.74 | 9.40  | 9.86  | 9.94  | 10.17 | 10.39 | 10.36 | 10.82 | 10.13 | 10.09                 | 10.74 | 1.33 |
| 11              | 213281_at      | BE327172               | ---                    | 0.016692 | 6.90 | 6.70 | 6.41 | 6.92 | 6.98 | 7.47  | 7.93 | 8.27 | 8.33  | 8.67  | 8.79  | 7.86  | 9.33  | 9.18  | 9.45  | 9.07  | 9.45                  | 8.99  | 1.31 |
| 11              | 1568609_s_at   | AL118843               | FAM91A2 /// FLJ39739   | 0.019210 | 5.74 | 5.56 | 5.78 | 6.55 | 6.38 | 6.14  | 6.35 | 6.23 | 6.06  | 7.21  | 6.83  | 7.16  | 7.00  | 7.00  | 7.05  | 6.94  | 7.24                  | 7.37  | 2.10 |
| 11              | 202843_at      | NM_012328              | DNAJB9                 | 0.004829 | 5.17 | 5.15 | 5.15 | 7.11 | 6.98 | 7.50  | 6.41 | 6.41 | 7.46  | 8.04  | 8.12  | 8.17  | 8.30  | 8.17  | 8.63  | 7.76  | 7.83                  | 8.07  | 2.48 |
| 12              | 212355_at      | AI075450               | KIAA0323               | 0.038460 | 8.60 | 8.92 | 8.88 | 8.73 | 8.77 | 8.90  | 8.30 | 8.48 | 8.62  | 8.89  | 8.94  | 9.25  | 9.47  | 9.46  | 9.62  | 9.68  | 9.61                  | 9.77  | 1.64 |
| 12              | 210174_at      | AF228413               | NR5A2                  | 0.048394 | 7.98 | 8.08 | 8.12 | 7.35 | 7.26 | 7.59  | 7.68 | 7.74 | 8.35  | 7.78  | 7.67  | 7.67  | 8.67  | 8.54  | 8.93  | 9.00  | 9.39                  | 9.44  | 1.80 |
| 12              | 227368_at      | AW009630               | C6orf166               | 0.042280 | 6.72 | 6.93 | 6.84 | 6.42 | 6.45 | 6.69  | 6.38 | 6.35 | 6.66  | 6.70  | 6.82  | 6.84  | 7.43  | 7.32  | 7.38  | 7.60  | 7.73                  | 8.15  | 1.44 |
| 12              | 228948_at      | T15545                 | EPHA4                  | 0.000043 | 7.51 | 7.03 | 6.83 | 7.03 | 7.10 | 7.23  | 7.39 | 7.41 | 7.36  | 7.56  | 7.51  | 7.32  | 8.68  | 8.84  | 8.78  | 9.62  | 9.99                  | 9.69  | 0.90 |
| 12              | 207557_s_at    | NM_001035              | RYR2                   | 0.003712 | 6.34 | 6.14 | 6.20 | 6.32 | 6.40 | 6.15  | 6.47 | 6.50 | 6.16  | 6.57  | 6.47  | 6.57  | 7.61  | 7.77  | 7.68  | 8.17  | 8.51                  | 9.20  | 1.07 |
| 12              | 212486_s_at    | N20923                 | FYN                    | 0.024555 | 5.39 | 5.37 | 5.38 | 5.67 | 5.56 | 5.67  | 5.50 | 5.68 | 5.47  | 5.64  | 5.79  | 5.76  | 6.59  | 6.73  | 6.73  | 7.00  | 7.32                  | 8.09  | 1.18 |
| 12              | 228211_at      | AI693726               | C9orf102               | 0.010566 | 7.01 | 7.12 | 6.85 | 7.00 | 6.82 | 7.04  | 7.09 | 6.87 | 7.15  | 7.24  | 7.23  | 7.20  | 7.55  | 7.52  | 7.75  | 8.09  | 8.02                  | 8.33  | 1.06 |
| 12              | 205298_s_at    | W58757                 | BTN2A2                 | 0.000784 | 7.87 | 7.84 | 7.83 | 7.71 | 7.53 | 7.75  | 7.87 | 8.02 | 8.12  | 8.22  | 8.31  | 8.36  | 8.82  | 9.01  | 9.42  | 9.84  | 10.14                 | 10.52 | 0.93 |
| 12              | 228736_at      | AW084661               | HEL308                 | 0.018179 | 6.13 | 6.04 | 6.13 | 6.03 | 5.99 | 6.21  | 6.25 | 6.14 | 6.37  | 6.53  | 6.43  | 6.53  | 6.85  | 7.07  | 7.21  | 7.58  | 7.74                  | 8.37  | 1.12 |
| 12              | 220081_x_at    | NM_016371              | HSD17B7                | 0.000330 | 9.05 | 8.66 | 8.78 | 8.88 | 8.80 | 9.11  | 8.96 | 8.95 | 9.19  | 9.31  | 9.41  | 9.17  | 9.88  | 9.85  | 9.97  | 10.55 | 10.71                 | 10.83 | 0.90 |
| 12              | 225951_s_at    | AV756026               | LOC440309              | 0.008679 | 9.54 | 9.62 | 9.60 | 9.75 | 9.63 | 10.14 | 9.60 | 9.49 | 10.14 | 10.27 | 10.28 | 10.36 | 10.72 | 10.72 | 11.06 | 11.53 | 11.58                 | 11.79 | 1.06 |
| 12              | 209656_s_at    | AL136550               | TMEM47                 | 0.002475 | 7.32 | 7.59 | 7.50 | 7.97 | 8.08 | 8.63  | 8.16 | 8.34 | 9.06  | 8.69  | 8.75  | 8.70  | 9.80  | 9.61  | 10.11 | 10.82 | 11.14                 | 11.57 | 1.24 |
| 12              | 208067_x_at    | NM_007125              | UTY                    | 0.044878 | 6.97 | 6.98 | 6.59 | 6.92 | 6.99 | 6.96  | 7.12 | 7.00 | 6.94  | 7.40  | 7.20  | 7.26  | 7.60  | 7.86  | 7.64  | 7.79  | 7.77                  | 7.82  | 1.43 |
| 12              | 220066_at      | NM_022162              | CARD15                 | 0.024169 | 4.93 | 4.75 | 4.92 | 4.76 | 4.85 | 4.84  | 5.06 | 4.85 | 4.97  | 5.22  | 5.16  | 5.31  | 6.18  | 6.08  | 6.22  | 6.30  | 5.68                  | 6.42  | 1.35 |
| 12              | 242875_at      | AI659439               | PSEN1                  | 0.032569 | 8.09 | 8.07 | 7.51 | 8.49 | 7.98 | 7.95  | 8.20 | 8.11 | 8.13  | 8.24  | 8.25  | 8.12  | 9.45  | 9.45  | 9.06  | 9.58  | 9.55                  | 9.53  | 1.40 |
| 12              | 210297_s_at    | U22178                 | MSMB                   | 0.022710 | 5.51 | 5.41 | 5.38 | 5.28 | 5.34 | 5.33  | 5.38 | 5.44 | 5.29  | 5.44  | 5.38  | 5.48  | 5.90  | 5.82  | 6.09  | 5.99  | 6.00                  | 5.84  | 1.52 |
| 12              | 204697_s_at    | NM_001275              | CHGA                   | 0.000758 | 6.22 | 6.12 | 6.33 | 6.06 | 6.02 | 5.87  | 6.25 | 6.20 | 6.11  | 6.22  | 6.28  | 6.19  | 6.77  | 6.88  | 6.94  | 6.83  | 6.91                  | 6.83  | 1.50 |
| 12              | 206565_x_at    | NM_006780              | SMA3                   | 0.032398 | 7.26 | 6.97 | 7.10 | 6.95 | 6.84 | 7.04  | 7.00 | 7.14 | 7.21  | 7.20  | 7.28  | 7.29  | 7.79  | 7.78  | 7.87  | 7.88  | 8.13                  | 7.74  | 1.25 |
| 12              | 238103_at      | BF594323               | ---                    | 0.040596 | 5.05 | 5.06 | 4.92 | 4.92 | 5.05 | 5.07  | 5.14 | 5.14 | 5.27  | 5.67  | 5.25  | 5.34  | 6.19  | 6.46  | 6.93  | 6.57  | 7.29                  | 6.67  | 1.06 |
| 12              | 212078_s_at    | AA704766               | MLL                    | 0.021475 | 8.22 | 8.24 | 8.19 | 8.15 | 8.07 | 8.05  | 8.21 | 8.41 | 8.48  | 8.55  | 8.51  | 8.52  | 9.04  | 9.06  | 9.33  | 9.14  | 9.61                  | 9.15  | 1.15 |
| 12              | 205558_at      | NM_004620              | TRAF6                  | 0.009523 | 7.59 | 7.53 | 7.48 | 7.29 | 7.41 | 7.42  | 7.65 | 7.32 | 7.54  | 7.65  | 7.66  | 7.77  | 7.99  | 8.17  | 8.23  | 8.27  | 8.39                  | 8.28  | 1.06 |
| 12              | 212076_at      | AI701430               | MLL                    | 0.043961 | 7.77 | 8.16 | 7.78 | 7.91 | 7.64 | 7.73  | 7.81 | 7.86 | 7.77  | 8.23  | 8.01  | 8.09  | 8.64  | 8.71  | 8.73  | 8.63  | 8.96                  | 8.75  | 1.30 |
| 12              | 212080_at      | AV714029               | LOC143941              | 0.013132 | 8.47 | 8.85 | 8.54 | 8.19 | 8.36 | 8.09  | 8.42 | 8.57 | 8.75  | 8.85  | 8.80  | 8.98  | 9.36  | 9.40  | 9.54  | 9.48  | 9.75                  | 9.51  | 1.45 |
| 12              | 210007_s_at    | U36310                 | GPD2                   | 0.004013 | 6.86 | 7.01 | 7.01 | 6.95 | 6.98 | 7.05  | 7.22 | 6.93 | 7.28  | 7.28  | 7.22  | 7.25  | 7.76  | 7.62  | 7.83  | 8.35  | 8.04                  | 8.13  | 1.02 |
| 12              | 222414_at      | AA121529               | MLL3                   | 0.000232 | 7.88 | 8.07 | 7.71 | 8.19 | 7.79 | 8.32  | 8.31 | 7.97 | 8.61  | 8.82  | 8.61  | 8.90  | 10.16 | 10.13 | 10.11 | 10.81 | 10.84                 | 10.39 | 0.79 |
| 12              | 238419_at      | T68150                 | PHLDB2                 | 0.023666 | 6.61 | 6.62 | 6.95 | 6.96 | 6.62 | 7.30  | 7.61 | 6.97 | 7.53  | 8.23  | 7.45  | 7.61  | 9.06  | 8.80  | 8.91  | 9.75  | 9.66                  | 9.04  | 1.27 |
| 12              | 1560071_a_at   | T94585                 | ---                    | 0.035917 | 5.72 | 5.83 | 5.86 | 5.79 | 5.76 | 5.95  | 5.99 | 5.94 | 6.30  | 5.93  | 6.06  | 6.09  | 6.62  | 6.48  | 6.64  | 6.74  | 6.89                  | 6.63  | 1.29 |
| 12              | 226555_at      | BG026789               | ---                    | 0.004768 | 7.78 | 8.00 | 7.90 | 7.64 | 7.88 | 8.06  | 7.72 | 7.85 | 7.95  | 8.32  | 8.14  | 8.25  | 9.25  | 8.96  | 9.20  | 9.51  | 9.48                  | 9.04  | 1.07 |
| 12              | 215078_at      | AL050388               | SOD2                   | 0.000320 | 4.85 | 4.79 | 4.81 | 4.95 | 4.91 | 5.03  | 5.27 | 5.07 | 5.12  | 5.36  | 5.47  | 5.19  | 6.74  | 6.51  | 6.99  | 7.13  | 6.93                  | 6.50  | 1.13 |
| 12              | 238961_s_at    | AA452239               | FNDC3A                 | 0.033349 | 6.76 | 6.43 | 6.48 | 6.74 | 6.59 | 7.03  | 6.61 | 6.70 | 6.71  | 7.00  | 6.89  | 6.74  | 7.85  | 7.99  | 8.20  | 8.54  | 8.48                  | 7.81  | 1.32 |
| 12              | 220941_s_at    | NM_017447              | C21orf91               | 0.005433 | 7.38 | 6.89 | 6.82 | 7.33 | 7.26 | 7.43  | 7.38 | 7.41 | 7.48  | 7.78  | 7.43  | 7.38  | 8.26  | 8.41  | 8.43  | 8.85  | 8.86                  | 8.63  | 1.19 |
| 12              | 232940_s_at    | AK025911               | MLL3                   | 0.012060 | 7.35 | 7.14 | 6.93 | 7.27 | 7.18 | 7.41  | 7.47 | 7.29 | 7.40  | 7.74  | 7.36  | 7.09  | 8.75  | 8.38  | 8.23  | 9.17  | 9.05                  | 8.91  | 1.28 |
| 12              | 1552695_a_at   | NM_052885              | SLC2A13                | 0.000052 | 6.73 | 6.67 | 6.31 | 6.70 | 6.58 | 6.86  | 6.90 | 6.65 | 6.94  | 7.00  | 6.36  | 6.52  | 8.67  | 8.55  | 8.53  | 9.43  | 9.76                  | 9.31  | 1.16 |
| 12              | 204135_at      | NM_014890              | DOC1                   | 0.002028 | 5.77 | 5.70 | 5.64 | 5.72 | 5.91 | 5.99  | 5.93 | 5.87 | 5.78  | 6.02  | 5.97  | 5.90  | 6.60  | 6.47  | 6.40  | 6.71  | 6.88                  | 6.66  | 1.14 |
| 12              | 244342_at      | BF508025               | FLJ36874               | 0.013376 | 5.55 | 5.34 | 5.35 | 5.47 | 5.37 | 5.36  | 5.75 | 5.70 | 5.74  | 5.73  | 5.54  | 5.49  | 6.44  | 6.15  | 6.22  | 6.49  | 7.02                  | 6.69  | 1.40 |
| 12              | 215717_s_at    | X62009                 | FBN2                   | 0.003951 | 4.74 | 4.79 | 4.83 | 4.64 | 4.65 | 4.70  | 4.69 | 4.72 | 4.87  | 4.80  | 4.80  | 4.82  | 5.38  | 5.57  | 5.64  | 6.10  | 5.71                  | 6.26  | 1.10 |
| 12              | 215931_s_at    | AV657604               | ARFGF2                 | 0.018746 | 5.75 | 6.16 | 5.98 | 5.98 | 5.97 | 5.93  | 5.68 | 5.88 | 6.00  | 6.12  | 6.16  | 6.37  | 6.71  | 6.96  | 6.96  | 7.67  | 7.13                  | 7.64  | 1.13 |
| 12              | 212614_at      | BG285011               | ARID5B                 | 0.004612 | 8.32 | 8.53 | 8.33 | 8.14 | 8.18 | 8.47  | 7.87 | 8.01 | 8.44  | 8.71  | 8.62  | 8.65  | 9.96  | 9.89  | 10.17 | 9.83  | 10.04                 | 10.57 | 1.07 |
| 12              | 218330_s_at    | NM_018162              | NAV2                   | 0.000016 | 7.26 | 7.62 | 7.42 | 7.64 | 7.49 | 8.10  | 6.62 | 6.77 | 7.51  | 8.10  | 8.05  | 8.13  | 10.32 | 10.38 | 10.71 | 11.43 | 11.50                 | 11.98 | 0.84 |
| 12              | 204937_s_at    | NM_016325              | ZNF274                 | 0.001220 | 8.52 | 8.75 | 8.60 | 8.46 | 8.24 | 8.87  | 7.52 | 7.94 | 8.55  | 8.89  | 8.89  | 8.90  | 10.30 | 10.18 | 10.56 | 11.01 | 11.14                 | 11.19 | 1.09 |
| 12              | 225339_at      | BG290577               | SPAG9                  | 0.044552 | 8.74 | 9.05 | 8.96 | 8.89 | 8.82 | 9.03  | 8.75 | 8.68 | 8.56  | 8.81  | 8.93  | 9.15  | 9.88  | 9.96  | 10.13 | 10.18 | 10.11                 | 10.80 | 1.19 |
| 12              | 225186_at      | BF114947               | RAPH1                  | 0.007185 | 6.67 | 7.10 | 7.19 | 6.63 | 6.41 | 6.86  | 6.54 | 6.60 | 6.80  |       |       |       |       |       |       |       |                       |       |      |

| K-Mean<br>Order | Probe<br>Names | GBiD      | Gene<br>Symbol             | Adj. p-Value<br>≤0.05, |      |      |      |      |      |      |      |      |      |      |      |      |       |       |       |       |       |       | K-Means<br>Similarity |      |
|-----------------|----------------|-----------|----------------------------|------------------------|------|------|------|------|------|------|------|------|------|------|------|------|-------|-------|-------|-------|-------|-------|-----------------------|------|
|                 |                |           |                            | Bonferroni             | c1   | c2   | c3   | 6h1  | 6h2  | 6h3  | 12h1 | 12h2 | 12h3 | 24h1 | 24h2 | 24h3 | 48h1  | 48h2  | 48h3  | 72h1  | 72h2  | 72h3  |                       |      |
| 12              | 229374_at      | AI758962  | EPHA4                      | 0.000002               | 6.69 | 6.65 | 6.58 | 6.27 | 6.46 | 6.47 | 6.57 | 6.58 | 6.59 | 6.74 | 6.68 | 6.80 | 7.46  | 7.78  | 7.75  | 8.25  | 8.37  | 8.26  | 0.79                  |      |
| 12              | 228388_at      | AA044140  | NFKB1B                     | 0.000000               | 7.22 | 7.15 | 7.17 | 6.92 | 7.02 | 7.01 | 7.07 | 7.10 | 7.02 | 7.18 | 7.27 | 7.38 | 7.88  | 7.91  | 8.07  | 8.44  | 8.42  | 8.44  | 0.78                  |      |
| 12              | 220294_at      | NM_014379 | KCNV1                      | 0.000001               | 5.33 | 5.63 | 5.52 | 5.42 | 5.36 | 5.55 | 5.62 | 5.64 | 5.74 | 6.30 | 6.30 | 6.15 | 7.51  | 7.37  | 7.15  | 8.20  | 8.03  | 8.31  | 0.54                  |      |
| 12              | 232172_at      | AK023533  | LOC401577                  | 0.000000               | 6.74 | 6.94 | 7.01 | 6.88 | 6.92 | 6.89 | 7.22 | 7.02 | 7.09 | 7.86 | 7.73 | 7.71 | 9.39  | 9.38  | 9.13  | 10.71 | 10.57 | 10.76 | 0.56                  |      |
| 12              | 202042_at      | NM_002109 | HARS                       | 0.000000               | 8.96 | 9.36 | 9.35 | 8.93 | 8.96 | 8.69 | 8.99 | 9.15 | 8.94 | 9.73 | 9.93 | 9.98 | 11.64 | 11.61 | 11.72 | 12.50 | 12.70 | 12.61 | 0.58                  |      |
| 12              | 223422_s_at    | AI743534  | ARHGAP24                   | 0.000001               | 7.68 | 7.72 | 7.80 | 7.46 | 7.66 | 7.71 | 7.74 | 7.68 | 7.96 | 8.13 | 8.01 | 8.04 | 9.21  | 9.21  | 9.45  | 9.94  | 10.06 | 9.92  | 0.49                  |      |
| 12              | 205114_s_at    | NM_002983 | CCL3 /// CCL3L1 /// CCL3L2 | 0.000000               | 6.48 | 6.38 | 6.48 | 6.47 | 6.28 | 6.38 | 6.46 | 6.51 | 6.57 | 7.83 | 7.77 | 7.40 | 10.96 | 10.96 | 10.97 | 12.07 | 12.44 | 12.43 | 0.39                  |      |
| 12              | 232799_at      | AU157195  | KIAA1571                   | 0.000000               | 5.13 | 5.02 | 4.95 | 4.96 | 5.07 | 5.22 | 5.23 | 5.29 | 5.30 | 5.79 | 5.84 | 5.65 | 7.66  | 7.93  | 7.76  | 8.61  | 9.04  | 8.93  | 0.42                  |      |
| 12              | 1556378_a_at   | BC036611  | LOC401528 /// LOC401530 /  | 0.000000               | 5.69 | 5.83 | 6.08 | 5.87 | 6.08 | 5.95 | 5.86 | 6.04 | 5.76 | 6.59 | 6.92 | 7.01 | 9.31  | 9.83  | 9.75  | 11.28 | 11.43 | 12.13 | 0.58                  |      |
| 12              | 237449_at      | BF447038  | SP8                        | 0.000000               | 5.10 | 4.97 | 5.20 | 4.98 | 5.14 | 5.06 | 5.21 | 5.24 | 5.17 | 5.99 | 5.88 | 6.18 | 8.90  | 8.66  | 9.30  | 10.10 | 10.95 | 11.09 | 0.49                  |      |
| 12              | 229625_at      | BG545653  | GBP5                       | 0.000000               | 6.55 | 6.79 | 6.78 | 6.56 | 6.64 | 6.66 | 6.72 | 6.63 | 6.75 | 7.35 | 7.25 | 7.28 | 8.93  | 8.96  | 9.18  | 9.89  | 10.32 | 10.23 | 0.43                  |      |
| 12              | 52255_s_at     | AI984221  | COL5A3                     | 0.000004               | 7.36 | 7.37 | 7.45 | 7.37 | 7.38 | 7.35 | 7.33 | 7.51 | 7.23 | 7.65 | 7.66 | 7.56 | 8.36  | 8.42  | 8.20  | 9.18  | 9.13  | 8.95  | 1.02                  |      |
| 12              | 226487_at      | BE551088  | FLJ14721                   | 0.000010               | 7.52 | 7.37 | 7.56 | 7.31 | 7.23 | 7.46 | 7.55 | 7.70 | 7.41 | 7.64 | 7.74 | 7.53 | 8.72  | 8.64  | 8.51  | 9.46  | 9.38  | 9.20  | 0.97                  |      |
| 12              | 203990_s_at    | AI140752  | UTX                        | 0.000049               | 6.18 | 6.64 | 6.39 | 6.29 | 6.35 | 6.77 | 6.61 | 6.29 | 6.63 | 7.28 | 6.88 | 7.81 | 8.45  | 8.97  | 9.09  | 10.60 | 10.77 | 10.64 | 0.82                  |      |
| 12              | 1558094_s_at   | AL526467  | C3orf19                    | 0.000403               | 6.62 | 6.78 | 6.81 | 6.86 | 6.73 | 6.86 | 7.01 | 6.63 | 6.97 | 7.28 | 7.11 | 7.18 | 7.70  | 7.76  | 7.95  | 8.32  | 8.57  | 8.29  | 0.80                  |      |
| 12              | 1555355_a_at   | BC017314  | ETS1                       | 0.000001               | 6.38 | 6.23 | 6.46 | 6.63 | 6.38 | 6.57 | 6.43 | 6.41 | 6.42 | 6.83 | 6.66 | 6.91 | 8.08  | 7.92  | 7.95  | 8.72  | 8.51  | 8.46  | 0.73                  |      |
| 12              | 209949_at      | BC001606  | NCF2                       | 0.000000               | 5.80 | 5.65 | 5.67 | 6.01 | 5.83 | 6.20 | 5.53 | 5.51 | 5.70 | 6.20 | 6.19 | 6.18 | 8.38  | 8.42  | 8.74  | 9.12  | 8.99  | 9.04  | 0.84                  |      |
| 12              | 232257_s_at    | AK022645  | ---                        | 0.000284               | 5.07 | 4.92 | 5.00 | 5.03 | 4.95 | 5.45 | 4.92 | 4.92 | 5.40 | 5.58 | 5.54 | 5.39 | 6.96  | 6.85  | 7.58  | 7.70  | 7.81  | 7.72  | 0.70                  |      |
| 12              | 204472_at      | NM_005261 | GEM                        | 0.000410               | 6.94 | 7.07 | 6.78 | 6.93 | 7.00 | 7.52 | 7.03 | 6.95 | 7.47 | 7.68 | 7.43 | 7.38 | 8.72  | 8.73  | 9.29  | 9.79  | 9.84  | 9.85  | 0.72                  |      |
| 12              | 1554283_at     | BC021963  | CCRNL4                     | 0.000063               | 6.69 | 6.75 | 6.82 | 6.78 | 6.78 | 7.42 | 6.94 | 6.97 | 7.32 | 7.66 | 7.66 | 7.55 | 9.29  | 8.91  | 9.55  | 10.12 | 9.82  | 9.89  | 0.64                  |      |
| 12              | 230380_at      | AW235671  | PSRC2                      | 0.000100               | 5.50 | 5.34 | 5.42 | 5.25 | 5.06 | 5.82 | 5.33 | 5.23 | 5.95 | 5.77 | 5.91 | 5.99 | 7.77  | 7.91  | 8.15  | 8.54  | 8.97  | 9.01  | 0.59                  |      |
| 12              | 225444_at      | AV733292  | ---                        | 0.000156               | 7.72 | 7.79 | 7.70 | 7.67 | 7.62 | 8.03 | 7.67 | 7.65 | 8.24 | 8.01 | 8.06 | 7.95 | 9.21  | 9.46  | 9.56  | 10.00 | 10.18 | 10.09 | 0.70                  |      |
| 12              | 223898_at      | BC005360  | ZNF670                     | 0.002575               | 5.86 | 5.79 | 6.21 | 5.87 | 6.05 | 6.35 | 5.81 | 5.97 | 6.95 | 6.49 | 6.50 | 6.55 | 7.96  | 7.90  | 8.40  | 9.03  | 9.36  | 9.37  | 0.82                  |      |
| 12              | 203896_s_at    | NM_000933 | PLCB4                      | 0.000014               | 7.67 | 7.49 | 7.17 | 7.90 | 7.47 | 8.40 | 8.15 | 7.70 | 8.31 | 8.39 | 8.41 | 8.43 | 10.45 | 10.55 | 10.75 | 12.16 | 11.79 | 11.98 | 0.73                  |      |
| 12              | 223780_s_at    | AF151055  | THRAP1                     | 0.000471               | 8.22 | 7.99 | 7.86 | 8.01 | 7.79 | 8.41 | 8.30 | 8.11 | 8.38 | 8.42 | 8.44 | 8.39 | 9.47  | 9.45  | 9.56  | 9.84  | 10.03 | 10.05 | 0.72                  |      |
| 12              | 213103_at      | AA128023  | STARD13                    | 0.000031               | 7.37 | 7.30 | 7.20 | 7.11 | 7.28 | 7.14 | 7.39 | 7.39 | 7.42 | 7.47 | 7.46 | 7.35 | 8.35  | 8.48  | 8.42  | 8.64  | 9.06  | 9.04  | 0.80                  |      |
| 12              | 204584_at      | AI653981  | LICAM                      | 0.000000               | 7.55 | 7.55 | 7.43 | 7.68 | 7.73 | 7.62 | 7.69 | 7.63 | 7.60 | 7.71 | 7.80 | 7.65 | 9.06  | 9.03  | 9.23  | 9.48  | 9.74  | 9.65  | 0.83                  |      |
| 12              | 240728_at      | AI224105  | PLCB4                      | 0.000008               | 7.26 | 7.38 | 7.12 | 7.39 | 7.12 | 7.45 | 7.28 | 7.59 | 7.82 | 7.73 | 7.88 | 7.61 | 9.66  | 9.71  | 10.05 | 10.42 | 10.93 | 10.99 | 0.58                  |      |
| 12              | 206026_s_at    | NM_007115 | TNFAIP6                    | 0.000000               | 4.88 | 4.82 | 4.88 | 4.84 | 4.86 | 5.01 | 5.01 | 5.19 | 5.37 | 5.22 | 5.28 | 5.28 | 7.70  | 7.73  | 8.07  | 8.31  | 8.77  | 8.55  | 0.69                  |      |
| 12              | 206893_at      | NM_002968 | SALL1                      | 0.000000               | 4.29 | 4.29 | 4.25 | 4.36 | 4.36 | 4.27 | 4.42 | 4.43 | 4.60 | 4.79 | 4.58 | 4.62 | 6.58  | 6.75  | 7.09  | 7.83  | 8.18  | 8.49  | 0.68                  |      |
| 12              | 210432_s_at    | AF225986  | SCN3A                      | 0.000000               | 4.83 | 4.57 | 4.56 | 4.88 | 4.75 | 4.90 | 4.72 | 4.88 | 4.82 | 5.25 | 5.31 | 5.34 | 8.60  | 9.10  | 9.08  | 10.90 | 10.94 | 11.21 | 0.66                  |      |
| 12              | 203862_s_at    | H16245    | ACTN2                      | 0.000003               | 5.45 | 5.27 | 5.17 | 5.22 | 5.28 | 5.10 | 5.20 | 5.26 | 5.41 | 5.52 | 5.75 | 5.71 | 7.78  | 8.15  | 7.84  | 8.95  | 8.99  | 9.75  | 0.69                  |      |
| 12              | 238581_at      | BG271923  | GBP5                       | 0.000000               | 4.95 | 4.99 | 5.10 | 4.96 | 4.90 | 5.01 | 4.93 | 5.04 | 5.14 | 5.32 | 5.38 | 5.39 | 8.36  | 8.76  | 8.76  | 9.44  | 9.55  | 10.09 | 0.67                  |      |
| 12              | 227140_at      | AI343467  | INHBA                      | 0.000010               | 4.89 | 4.83 | 4.60 | 4.74 | 4.76 | 4.80 | 4.80 | 4.88 | 5.15 | 5.25 | 5.30 | 5.09 | 8.03  | 7.97  | 8.28  | 8.67  | 8.90  | 9.85  | 0.68                  |      |
| 12              | 206969_at      | NM_021013 | KRTHA4                     | 0.000002               | 5.65 | 5.70 | 5.68 | 5.53 | 5.72 | 5.64 | 5.75 | 5.89 | 5.62 | 5.80 | 5.82 | 5.62 | 6.87  | 7.06  | 6.84  | 7.43  | 7.61  | 7.56  | 0.95                  |      |
| 12              | 206082_at      | NM_006674 | ---                        | 0.000000               | 6.59 | 6.54 | 6.49 | 6.54 | 6.41 | 6.64 | 6.42 | 6.63 | 6.55 | 6.72 | 6.52 | 6.50 | 8.47  | 8.42  | 8.42  | 9.40  | 9.55  | 9.64  | 0.91                  |      |
| 12              | 209763_at      | AL049176  | CHRD1L                     | 0.000023               | 5.59 | 5.39 | 5.61 | 5.52 | 5.57 | 5.58 | 5.69 | 5.61 | 5.56 | 5.53 | 5.69 | 5.60 | 6.34  | 6.47  | 6.48  | 6.80  | 6.74  | 6.96  | 0.97                  |      |
| 12              | 243640_x_at    | AI084024  | CDC14A                     | 0.000069               | 7.58 | 7.36 | 7.58 | 7.57 | 7.48 | 7.74 | 7.52 | 7.48 | 7.81 | 7.55 | 7.76 | 7.57 | 8.78  | 8.83  | 8.74  | 9.25  | 9.51  | 9.76  | 0.97                  |      |
| 12              | 223322_at      | BC004270  | RASSF5                     | 0.000524               | 7.62 | 7.35 | 7.47 | 7.35 | 7.37 | 7.52 | 7.50 | 7.46 | 7.64 | 7.41 | 7.53 | 7.49 | 8.62  | 8.63  | 8.79  | 8.84  | 9.01  | 9.43  | 1.02                  |      |
| 12              | 244010_at      | AI057455  | MLL3                       | 0.000474               | 5.07 | 5.03 | 4.96 | 5.11 | 4.94 | 5.10 | 5.09 | 5.17 | 5.09 | 5.16 | 5.32 | 5.10 | 6.19  | 6.10  | 6.25  | 6.56  | 6.33  | 7.08  | 0.98                  |      |
| 12              | 214967_at      | AU146983  | ---                        | 0.002143               | 5.57 | 5.40 | 5.27 | 5.81 | 5.51 | 5.74 | 5.67 | 5.77 | 5.96 | 5.86 | 5.89 | 5.82 | 7.42  | 6.97  | 7.44  | 7.87  | 7.76  | 8.65  | 0.97                  |      |
| 12              | 244846_at      | AI953395  | MAP4K4                     | 0.000055               | 5.01 | 5.06 | 4.95 | 5.13 | 5.02 | 5.26 | 5.39 | 5.20 | 5.32 | 5.43 | 5.55 | 5.33 | 8.14  | 7.15  | 7.44  | 8.46  | 8.46  | 9.02  | 0.86                  |      |
| 12              | 201645_at      | NM_002160 | TNC                        | 0.000033               | 5.63 | 5.46 | 5.20 | 5.58 | 5.48 | 5.69 | 5.65 | 5.70 | 5.56 | 5.80 | 5.79 | 5.76 | 7.36  | 7.15  | 7.25  | 7.72  | 8.13  | 8.40  | 0.79                  |      |
| 12              | 239486_at      | BG111636  | ---                        | 0.000031               | 5.93 | 5.56 | 5.48 | 5.84 | 5.48 | 5.74 | 6.10 | 5.75 | 6.03 | 6.85 | 6.28 | 6.33 | 8.87  | 8.29  | 8.81  | 9.65  | 9.68  | 10.39 | 0.62                  |      |
| 12              | 221563_at      | N36770    | DUSP10                     | 0.000034               | 7.13 | 7.23 | 7.23 | 7.22 | 7.05 | 7.23 | 7.30 | 7.33 | 7.24 | 7.68 | 7.52 | 7.50 | 8.43  | 8.53  | 8.82  | 8.72  | 8.84  | 9.01  | 0.63                  |      |
| 12              | 223484_at      | AF228422  | NMES1                      | 0.000011               | 5.15 | 5.13 | 5.43 | 5.75 | 5.75 | 5.86 | 5.65 | 5.74 | 5.89 | 6.49 | 6.05 | 6.06 | 8.76  | 8.90  | 9.59  | 9.34  | 10.08 | 10.12 | 0.75                  |      |
| 12              | 230917_at      | AW611685  | ---                        | 0.000163               | 4.97 | 5.14 | 4.91 | 5.05 | 5.20 | 5.36 | 5.00 | 5.18 | 5.45 | 5.46 | 5.47 | 5.46 | 7.07  | 7.39  | 7.86  | 7.78  | 7.79  | 8.35  | 0.75                  |      |
| 12              | 212814_at      | AB020635  | KIAA0828                   | 0.000019               | 8.01 | 8.11 | 7.96 | 8.20 | 8.10 | 8.37 | 8.05 | 8.06 | 8.38 | 8.04 | 8.29 | 8.14 | 10.06 | 10.06 | 10.34 | 10.34 | 10.59 | 10.96 | 0.97                  |      |
| 12              | 205249_at      | NM_000399 | EGR2                       | 0.000159               | 5.94 | 5.66 | 5.79 | 5.76 | 5.81 | 5.96 | 6.17 | 6.19 | 6.26 | 6.26 | 6.23 | 6.22 | 7.89  | 7.71  | 8.40  | 8.30  | 8.32  | 8.93  | 0.81                  |      |
| 12              | 1552897_a_at   | NM_133329 | KCNGB3                     | 0.001320               | 5.12 | 5.12 | 5.13 | 5.38 | 5.46 | 5.55 | 5.40 | 5.42 | 5.45 | 5.65 | 5.64 | 5.73 | 7.36  | 6.99  | 7.88  | 7.58  | 7.93  | 8.52  | 0.88                  |      |
| 12              | 210511_s_at    | MI3436    | INHBA                      | 0.002102               | 6.27 | 6.30 | 6.49 | 6.49 | 6.47 | 6.39 | 6.48 | 6.60 | 6.10 | 6.34 | 6.73 | 6.75 | 6.72  | 8.25  | 8.12  | 8.79  | 8.58  | 9.11  | 9.67                  | 0.87 |
| 12              | 228988_at      | AU157017  | ZNF6                       | 0.006150               | 4.59 | 4.46 | 4.57 | 4.55 | 4.68 | 4.66 |      |      |      |      |      |      |       |       |       |       |       |       |                       |      |

| K-Mean<br>Order | Probe<br>Names | GBID      | Gene<br>Symbol | Adj. p-Value<br>≤0.05,<br>Bonferroni |      |      |      |      |      |      |      |      |       |       |       |       |       |       |       |       |       |       | K-Means<br>Similarity |
|-----------------|----------------|-----------|----------------|--------------------------------------|------|------|------|------|------|------|------|------|-------|-------|-------|-------|-------|-------|-------|-------|-------|-------|-----------------------|
|                 |                |           |                | c1                                   | c2   | c3   | 6h1  | 6h2  | 6h3  | 12h1 | 12h2 | 12h3 | 24h1  | 24h2  | 24h3  | 48h1  | 48h2  | 48h3  | 72h1  | 72h2  | 72h3  |       |                       |
| 12              | 235670_at      | AI916948  | ---            | 0.003181                             | 5.29 | 5.27 | 5.10 | 5.26 | 5.37 | 5.52 | 5.40 | 5.41 | 5.47  | 5.83  | 5.84  | 5.79  | 6.79  | 6.73  | 6.79  | 6.74  | 7.22  | 7.64  | 0.79                  |
| 12              | 203895_at      | AL535113  | PLCB4          | 0.000029                             | 7.95 | 8.03 | 7.85 | 8.42 | 8.03 | 8.94 | 8.11 | 8.10 | 8.82  | 9.11  | 9.10  | 9.48  | 11.22 | 11.30 | 11.59 | 12.61 | 12.52 | 13.12 | 0.57                  |
| 12              | 222548_s_at    | AL561281  | MAP4K4         | 0.001756                             | 7.52 | 7.25 | 7.24 | 7.55 | 7.52 | 7.86 | 7.36 | 7.63 | 7.84  | 7.95  | 8.03  | 8.04  | 9.13  | 9.03  | 9.42  | 9.50  | 9.52  | 10.15 | 0.77                  |
| 12              | 226893_at      | AW173164  | ABL2           | 0.000594                             | 8.92 | 8.86 | 8.60 | 9.03 | 9.03 | 9.19 | 8.74 | 8.94 | 9.35  | 9.36  | 9.45  | 9.43  | 10.33 | 10.43 | 10.58 | 10.95 | 11.05 | 11.48 | 0.71                  |
| 12              | 235593_at      | AL546529  | ZFXH1B         | 0.003931                             | 5.06 | 4.86 | 4.76 | 4.97 | 4.88 | 4.89 | 4.98 | 4.98 | 4.96  | 5.27  | 5.33  | 5.22  | 6.09  | 6.37  | 6.49  | 6.47  | 6.49  | 7.16  | 0.82                  |
| 12              | 220984_s_at    | NM_030958 | SLC05A1        | 0.018632                             | 5.76 | 5.55 | 5.62 | 5.71 | 5.72 | 5.65 | 5.96 | 6.06 | 5.70  | 6.29  | 6.10  | 5.97  | 6.66  | 6.95  | 7.19  | 7.16  | 7.64  | 7.89  | 1.03                  |
| 12              | 212079_s_at    | AA715041  | MLL            | 0.021233                             | 7.25 | 7.19 | 6.87 | 7.55 | 6.96 | 7.32 | 7.12 | 7.23 | 7.53  | 7.72  | 7.61  | 7.40  | 8.36  | 8.38  | 8.27  | 8.85  | 8.84  | 8.62  | 1.07                  |
| 12              | 241893_at      | BE927766  | ---            | 0.001082                             | 5.09 | 5.01 | 5.05 | 5.52 | 5.01 | 5.18 | 5.10 | 5.13 | 5.54  | 5.44  | 5.52  | 5.44  | 6.43  | 6.64  | 6.55  | 7.03  | 7.44  | 6.96  | 0.87                  |
| 12              | 227931_at      | AI823917  | ---            | 0.048452                             | 8.03 | 8.33 | 7.41 | 8.66 | 7.71 | 8.80 | 8.29 | 7.96 | 8.98  | 9.06  | 8.53  | 8.48  | 10.39 | 10.31 | 10.30 | 11.04 | 11.50 | 11.62 | 1.12                  |
| 12              | 205310_at      | NM_012066 | FBXO46         | 0.001456                             | 7.64 | 7.75 | 7.71 | 7.85 | 7.65 | 7.65 | 7.74 | 7.81 | 7.96  | 7.90  | 8.00  | 7.92  | 8.34  | 8.25  | 8.58  | 8.93  | 8.95  | 8.81  | 0.99                  |
| 12              | 223647_x_at    | BC000004  | HSC20          | 0.000266                             | 8.33 | 8.06 | 8.21 | 8.33 | 7.67 | 8.08 | 8.44 | 8.20 | 8.38  | 8.73  | 8.79  | 8.48  | 9.51  | 9.48  | 9.44  | 10.70 | 10.93 | 10.45 | 1.12                  |
| 12              | 202301_s_at    | BE396879  | FLJ11021       | 0.000005                             | 8.78 | 8.55 | 8.53 | 8.26 | 7.93 | 8.47 | 8.78 | 8.54 | 8.90  | 9.22  | 9.03  | 8.94  | 10.48 | 10.19 | 10.23 | 11.45 | 11.47 | 11.51 | 0.81                  |
| 12              | 206114_at      | NM_004438 | EPHA4          | 0.000011                             | 7.58 | 7.52 | 7.34 | 7.42 | 7.19 | 7.22 | 7.84 | 7.70 | 8.03  | 8.30  | 8.26  | 7.71  | 9.53  | 9.44  | 9.29  | 10.56 | 10.69 | 10.36 | 0.82                  |
| 12              | 205070_at      | NM_019071 | ING3           | 0.002825                             | 7.66 | 7.75 | 7.49 | 7.71 | 7.58 | 8.13 | 7.80 | 7.99 | 8.66  | 8.46  | 8.37  | 8.07  | 9.35  | 9.34  | 9.65  | 10.43 | 10.87 | 10.43 | 0.98                  |
| 12              | 226575_at      | T89120    | ZNF462         | 0.006120                             | 7.94 | 7.52 | 7.14 | 7.69 | 7.46 | 8.08 | 7.68 | 7.91 | 8.48  | 8.67  | 8.40  | 8.04  | 9.50  | 9.51  | 9.79  | 10.46 | 10.71 | 10.68 | 0.91                  |
| 12              | 244758_at      | AA480069  | ZNF452         | 0.042024                             | 5.59 | 5.46 | 5.45 | 5.44 | 5.31 | 5.60 | 5.42 | 5.47 | 5.85  | 5.62  | 5.71  | 5.65  | 6.07  | 6.31  | 6.25  | 6.47  | 6.79  | 6.69  | 1.02                  |
| 12              | 227267_at      | AI953478  | FLJ35779       | 0.018976                             | 7.49 | 7.42 | 7.37 | 7.15 | 7.11 | 7.61 | 7.54 | 7.38 | 7.82  | 7.76  | 7.62  | 7.74  | 8.07  | 8.14  | 8.20  | 8.70  | 8.85  | 8.82  | 1.21                  |
| 12              | 226391_at      | AW271788  | BRAF           | 0.005715                             | 7.32 | 7.39 | 7.44 | 7.23 | 7.16 | 7.51 | 7.16 | 7.43 | 7.48  | 7.47  | 7.68  | 7.63  | 8.17  | 8.39  | 8.28  | 8.55  | 8.43  | 8.73  | 0.83                  |
| 12              | 240206_at      | AA701890  | TARS           | 0.025460                             | 6.62 | 6.60 | 6.68 | 6.60 | 6.39 | 6.60 | 6.53 | 6.71 | 6.54  | 6.59  | 6.70  | 6.69  | 7.04  | 7.26  | 7.01  | 7.28  | 7.29  | 7.36  | 1.22                  |
| 12              | 229310_at      | BE465475  | KBTBD9         | 0.001335                             | 7.89 | 7.59 | 7.63 | 7.82 | 7.85 | 8.07 | 7.93 | 8.12 | 8.20  | 8.39  | 8.47  | 8.77  | 8.96  | 9.15  | 8.99  | 9.51  | 9.52  | 9.90  | 1.09                  |
| 12              | 1555862_s_at   | AK091986  | MICAL-L2       | 0.000295                             | 5.99 | 5.71 | 5.70 | 6.07 | 6.02 | 6.19 | 5.95 | 6.07 | 6.12  | 6.40  | 6.54  | 6.22  | 7.00  | 6.94  | 6.95  | 7.55  | 7.36  | 7.72  | 0.99                  |
| 12              | 237568_at      | H67156    | SLC25A37       | 0.006031                             | 7.69 | 7.40 | 7.41 | 7.72 | 7.62 | 7.82 | 7.77 | 7.76 | 7.92  | 7.82  | 7.99  | 7.85  | 8.46  | 8.51  | 8.37  | 8.58  | 8.59  | 8.83  | 1.17                  |
| 12              | 209189_at      | BC004490  | FOS            | 0.000046                             | 7.39 | 7.44 | 7.47 | 6.90 | 6.83 | 6.87 | 7.34 | 7.25 | 7.63  | 7.72  | 7.77  | 8.25  | 8.62  | 8.69  | 8.80  | 9.58  | 9.45  | 9.33  | 1.04                  |
| 12              | 1554015_a_at   | BC007347  | CHD2           | 0.000047                             | 7.19 | 7.32 | 7.34 | 6.99 | 7.07 | 6.98 | 7.07 | 7.12 | 7.48  | 7.69  | 7.65  | 7.97  | 8.49  | 8.72  | 8.74  | 9.25  | 9.17  | 8.99  | 0.75                  |
| 12              | 203992_s_at    | AF000992  | UTX            | 0.000003                             | 6.84 | 7.55 | 7.36 | 6.90 | 6.68 | 7.09 | 7.43 | 7.27 | 7.89  | 8.91  | 8.72  | 9.10  | 10.34 | 10.43 | 10.31 | 11.72 | 11.54 | 11.28 | 0.83                  |
| 12              | 205068_s_at    | BE671084  | ARHGAP26       | 0.000045                             | 7.58 | 8.19 | 7.86 | 7.47 | 7.64 | 7.75 | 7.86 | 7.83 | 8.18  | 8.72  | 8.55  | 8.92  | 9.72  | 9.81  | 10.16 | 10.55 | 10.59 | 10.52 | 0.68                  |
| 12              | 210790_s_at    | BC003658  | SAR1A          | 0.009966                             | 7.21 | 7.90 | 8.04 | 7.43 | 7.44 | 7.42 | 7.40 | 7.47 | 7.34  | 8.21  | 8.17  | 8.88  | 9.09  | 9.31  | 9.07  | 9.91  | 9.64  | 9.69  | 1.34                  |
| 12              | 202147_s_at    | NM_001550 | IFRD1          | 0.003243                             | 7.14 | 7.70 | 7.71 | 7.19 | 7.14 | 7.43 | 7.28 | 7.28 | 7.49  | 7.98  | 8.02  | 8.51  | 8.56  | 8.87  | 8.93  | 9.53  | 9.38  | 9.50  | 1.10                  |
| 12              | 219679_s_at    | NM_018604 | WAC            | 0.046823                             | 7.37 | 7.70 | 7.77 | 7.65 | 7.11 | 7.85 | 7.49 | 7.40 | 7.72  | 8.10  | 7.89  | 8.20  | 8.70  | 8.53  | 8.82  | 9.50  | 9.17  | 9.23  | 1.14                  |
| 12              | 203624_at      | NM_005088 | DXYS155E       | 0.000699                             | 8.48 | 8.97 | 8.86 | 8.74 | 8.72 | 8.75 | 8.59 | 8.76 | 9.05  | 9.50  | 9.55  | 9.75  | 10.01 | 10.03 | 10.28 | 10.56 | 10.66 | 10.54 | 1.07                  |
| 12              | 200670_at      | NM_005080 | XBP1           | 0.000116                             | 9.35 | 9.94 | 9.63 | 9.63 | 9.75 | 9.85 | 9.89 | 9.58 | 10.10 | 10.70 | 10.73 | 11.07 | 11.56 | 11.67 | 11.71 | 12.09 | 12.06 | 12.14 | 1.03                  |
| 12              | 201543_s_at    | NM_020150 | SAR1A          | 0.000029                             | 8.72 | 9.00 | 9.13 | 8.98 | 9.07 | 9.27 | 8.98 | 8.99 | 9.15  | 9.94  | 9.82  | 10.31 | 10.44 | 10.67 | 10.60 | 11.53 | 11.49 | 11.38 | 1.06                  |
| 12              | 211256_x_at    | U90142    | BTN2A1         | 0.044423                             | 7.70 | 7.88 | 7.83 | 7.88 | 7.69 | 7.90 | 7.89 | 7.92 | 8.09  | 8.12  | 8.21  | 8.40  | 8.52  | 8.70  | 8.76  | 8.75  | 9.09  | 9.27  | 1.00                  |
| 12              | 39582_at       | AL050166  | CYLD           | 0.003892                             | 7.22 | 7.40 | 7.33 | 7.12 | 7.16 | 7.23 | 7.40 | 7.38 | 7.66  | 7.81  | 7.89  | 7.92  | 8.20  | 8.28  | 8.38  | 8.40  | 8.67  | 8.96  | 1.05                  |
| 12              | 209907_s_at    | AF182198  | ITSN2          | 0.017516                             | 7.59 | 8.17 | 7.90 | 7.74 | 8.06 | 8.02 | 7.89 | 8.05 | 8.35  | 8.60  | 8.51  | 8.72  | 9.10  | 9.20  | 9.49  | 9.73  | 9.53  | 10.00 | 0.99                  |
| 12              | 212747_at      | AI990523  | ANKS1          | 0.000414                             | 7.92 | 8.08 | 8.11 | 7.72 | 7.58 | 7.73 | 8.03 | 7.87 | 8.24  | 8.63  | 8.70  | 8.56  | 9.09  | 9.60  | 9.40  | 9.41  | 9.67  | 9.69  | 1.11                  |
| 12              | 212239_at      | AI680192  | PIK3R1         | 0.005014                             | 7.59 | 7.62 | 7.43 | 7.50 | 7.21 | 7.36 | 7.44 | 7.52 | 7.81  | 8.03  | 8.06  | 8.02  | 8.44  | 8.37  | 8.66  | 8.65  | 8.86  | 9.03  | 1.01                  |
| 12              | 227755_at      | AA042983  | ---            | 0.000151                             | 7.92 | 7.84 | 7.73 | 7.22 | 7.28 | 7.64 | 7.33 | 7.56 | 7.90  | 8.79  | 8.95  | 8.70  | 9.55  | 9.56  | 9.72  | 9.69  | 9.75  | 10.16 | 1.31                  |
| 12              | 230868_at      | BF433103  | HIAT1          | 0.027820                             | 5.66 | 6.21 | 5.99 | 6.18 | 6.29 | 6.49 | 6.72 | 6.70 | 7.06  | 6.70  | 7.28  | 7.63  | 8.40  | 9.05  | 9.25  | 8.82  | 9.12  | 10.05 | 1.14                  |
| 12              | 222139_at      | AI765383  | KIAA1466       | 0.023906                             | 7.28 | 7.18 | 7.15 | 6.96 | 7.05 | 7.28 | 7.82 | 7.76 | 7.91  | 7.84  | 7.96  | 8.04  | 9.06  | 9.41  | 9.63  | 9.20  | 9.33  | 10.42 | 1.20                  |
| 12              | 214078_at      | AF070581  | PAK3           | 0.035023                             | 4.29 | 4.29 | 4.34 | 4.28 | 4.30 | 4.39 | 4.36 | 4.55 | 4.67  | 4.84  | 4.73  | 4.62  | 5.33  | 5.36  | 5.68  | 5.19  | 5.49  | 5.74  | 1.20                  |
| 12              | 227176_at      | AL565362  | SLC2A13        | 0.026861                             | 7.14 | 6.84 | 6.92 | 6.76 | 6.99 | 7.64 | 7.53 | 7.39 | 8.07  | 7.70  | 7.83  | 7.59  | 9.17  | 9.16  | 9.73  | 9.24  | 9.46  | 10.01 | 1                     |

| K-Mean<br>Order | Probe<br>Names | Gene<br>GBiD<br>Symbol | Adj. p-Value<br>≤0.05, |          |       |       |       |       |       |       |       |       |       |       |       |       |       |       |       |       |       | K-Means<br>Similarity |
|-----------------|----------------|------------------------|------------------------|----------|-------|-------|-------|-------|-------|-------|-------|-------|-------|-------|-------|-------|-------|-------|-------|-------|-------|-----------------------|
|                 |                |                        | Bonferroni             | c1       | c2    | c3    | 6h1   | 6h2   | 6h3   | 12h1  | 12h2  | 12h3  | 24h1  | 24h2  | 24h3  | 48h1  | 48h2  | 48h3  | 72h1  | 72h2  | 72h3  |                       |
| 12              | 206571_s_at    | NM_004834              | MAP4K4                 | 0.000001 | 8.91  | 9.19  | 9.18  | 9.37  | 9.57  | 9.47  | 9.51  | 9.84  | 10.23 | 10.26 | 10.23 | 11.36 | 11.51 | 11.60 | 12.07 | 12.10 | 12.45 | 0.63                  |
| 12              | 218909_at      | NM_012424              | RPS6KC1                | 0.000006 | 7.72  | 7.78  | 7.88  | 8.25  | 8.32  | 8.70  | 8.30  | 8.37  | 8.99  | 9.37  | 9.40  | 9.50  | 10.93 | 10.83 | 11.22 | 11.69 | 11.93 | 0.72                  |
| 12              | 233899_x_at    | AK024296               | ZBTB10                 | 0.000002 | 5.65  | 5.93  | 5.86  | 5.71  | 5.58  | 6.22  | 5.90  | 5.68  | 6.36  | 7.15  | 6.94  | 7.01  | 8.84  | 8.72  | 9.04  | 10.00 | 9.84  | 0.42                  |
| 12              | 219312_s_at    | NM_023929              | ZBTB10                 | 0.000010 | 5.00  | 5.05  | 5.01  | 4.83  | 4.94  | 5.26  | 4.83  | 5.02  | 5.73  | 6.34  | 6.22  | 6.23  | 8.18  | 8.24  | 8.78  | 9.43  | 9.38  | 0.36                  |
| 12              | 205931_s_at    | NM_004904              | CREB5                  | 0.000000 | 6.31  | 6.25  | 6.35  | 6.64  | 6.46  | 6.82  | 6.73  | 6.81  | 7.27  | 7.99  | 7.87  | 7.73  | 10.08 | 10.21 | 10.32 | 10.61 | 11.08 | 0.49                  |
| 12              | 227080_at      | AW003092               | ZNF697                 | 0.000000 | 6.71  | 7.03  | 6.92  | 7.16  | 7.11  | 7.32  | 7.02  | 7.11  | 7.39  | 8.02  | 8.08  | 7.89  | 9.51  | 9.60  | 9.84  | 10.20 | 10.35 | 0.47                  |
| 12              | 242807_at      | AI970348               | FSD1L                  | 0.000003 | 6.94  | 7.05  | 7.12  | 7.17  | 7.20  | 7.24  | 7.38  | 7.14  | 7.78  | 8.02  | 8.09  | 8.02  | 9.76  | 9.73  | 10.27 | 10.55 | 10.97 | 0.44                  |
| 12              | 222101_s_at    | BF222893               | DCHS1                  | 0.000000 | 6.76  | 6.68  | 6.58  | 6.70  | 6.72  | 6.91  | 7.10  | 7.15  | 6.98  | 7.95  | 7.81  | 7.84  | 9.10  | 9.30  | 9.63  | 10.32 | 10.50 | 0.47                  |
| 12              | 227449_at      | AI799018               | EPHA4                  | 0.000000 | 5.29  | 5.16  | 5.22  | 5.02  | 5.05  | 5.48  | 5.60  | 5.69  | 5.94  | 6.31  | 6.26  | 6.25  | 8.11  | 8.13  | 8.50  | 9.15  | 9.37  | 0.35                  |
| 12              | 229014_at      | AW206234               | FLJ42709               | 0.000015 | 8.29  | 8.10  | 8.16  | 8.11  | 8.02  | 8.17  | 8.26  | 8.24  | 8.44  | 8.62  | 8.59  | 8.46  | 9.26  | 9.35  | 9.61  | 9.79  | 9.90  | 0.49                  |
| 12              | 226337_at      | AK021814               | SCYL1BP1               | 0.000135 | 6.38  | 6.41  | 6.17  | 6.42  | 6.50  | 6.76  | 6.88  | 7.13  | 7.88  | 7.85  | 7.70  | 7.81  | 8.98  | 8.91  | 9.48  | 10.07 | 10.08 | 0.88                  |
| 12              | 227599_at      | AU157304               | LOC151963              | 0.000063 | 8.11  | 8.00  | 8.12  | 8.20  | 8.25  | 8.35  | 8.33  | 8.46  | 8.81  | 8.88  | 8.78  | 8.73  | 9.46  | 9.44  | 9.55  | 9.78  | 9.90  | 0.86                  |
| 12              | 201542_at      | AY008268               | SAR1A                  | 0.000493 | 9.73  | 9.98  | 9.93  | 9.79  | 9.53  | 10.25 | 10.09 | 9.83  | 10.54 | 10.94 | 11.00 | 11.19 | 11.75 | 11.87 | 12.13 | 12.62 | 12.64 | 0.86                  |
| 12              | 203991_s_at    | NM_021140              | UTX                    | 0.000025 | 5.49  | 5.67  | 5.66  | 5.35  | 5.13  | 5.58  | 5.62  | 5.76  | 6.46  | 7.12  | 7.09  | 6.94  | 8.60  | 8.52  | 9.08  | 9.46  | 9.62  | 0.59                  |
| 12              | 202668_at      | BF001670               | EFNB2                  | 0.000608 | 6.58  | 6.79  | 6.56  | 6.29  | 6.39  | 7.08  | 6.71  | 7.14  | 7.74  | 8.09  | 7.85  | 8.16  | 9.47  | 9.47  | 10.06 | 10.30 | 10.59 | 0.68                  |
| 12              | 210253_at      | AF092095               | HTATIP2                | 0.000314 | 7.85  | 7.77  | 7.63  | 7.77  | 7.62  | 7.98  | 8.07  | 8.03  | 8.59  | 8.59  | 8.62  | 8.64  | 9.59  | 9.67  | 9.98  | 10.05 | 10.29 | 0.67                  |
| 12              | 203725_at      | NM_001924              | GADD45A                | 0.000002 | 9.32  | 9.31  | 9.33  | 9.10  | 9.05  | 9.49  | 9.61  | 9.65  | 10.06 | 10.29 | 10.26 | 10.42 | 11.36 | 11.42 | 11.69 | 12.45 | 12.47 | 0.57                  |
| 12              | 1554352_s_at   | BC041706               | MYCPBP                 | 0.000525 | 7.27  | 7.40  | 7.36  | 7.15  | 7.30  | 7.57  | 7.63  | 7.38  | 8.09  | 8.26  | 8.25  | 8.44  | 8.95  | 9.20  | 9.51  | 9.81  | 10.03 | 0.75                  |
| 12              | 214787_at      | BE268538               | MYCPBP                 | 0.000828 | 5.17  | 5.65  | 5.55  | 5.40  | 5.59  | 5.78  | 5.65  | 5.70  | 6.34  | 6.47  | 6.50  | 6.76  | 7.44  | 7.40  | 8.18  | 8.13  | 8.68  | 0.85                  |
| 12              | 1554014_at     | BC007347               | CHD2                   | 0.018328 | 7.57  | 7.50  | 7.51  | 7.27  | 7.19  | 7.85  | 7.33  | 7.40  | 8.25  | 8.37  | 8.22  | 8.13  | 9.23  | 9.15  | 9.71  | 9.84  | 9.97  | 0.80                  |
| 12              | 217742_s_at    | NM_016628              | WAC                    | 0.009317 | 10.09 | 10.23 | 10.09 | 10.23 | 10.17 | 10.52 | 10.13 | 10.18 | 10.68 | 10.87 | 10.89 | 10.58 | 11.34 | 11.39 | 11.67 | 11.79 | 11.76 | 0.91                  |
| 12              | 233952_s_at    | AB033053               | ZNF295                 | 0.042267 | 8.10  | 8.28  | 7.77  | 8.30  | 7.79  | 8.61  | 7.90  | 7.99  | 8.76  | 8.89  | 8.71  | 8.57  | 9.90  | 9.80  | 10.15 | 10.21 | 10.53 | 0.66                  |
| 12              | 204435_at      | NM_014778              | NUPL1                  | 0.027804 | 7.24  | 7.43  | 6.99  | 7.31  | 6.95  | 7.46  | 7.18  | 7.01  | 7.88  | 7.85  | 7.93  | 7.96  | 8.92  | 9.03  | 9.35  | 9.36  | 9.64  | 0.80                  |
| 12              | 222413_s_at    | AW137099               | MLL3                   | 0.000837 | 8.44  | 8.79  | 8.49  | 8.85  | 8.42  | 9.04  | 8.79  | 8.77  | 9.36  | 9.40  | 9.49  | 9.02  | 10.76 | 10.56 | 10.94 | 11.29 | 11.66 | 0.72                  |
| 12              | 227991_x_at    | BF516567               | ZNF297B                | 0.005657 | 7.34  | 7.59  | 7.43  | 7.61  | 7.33  | 7.89  | 7.66  | 7.77  | 8.43  | 8.11  | 8.16  | 7.98  | 9.07  | 9.19  | 9.35  | 9.58  | 9.72  | 0.86                  |
| 12              | 237554_at      | BE348304               | ---                    | 0.002388 | 6.33  | 6.34  | 6.21  | 6.45  | 6.20  | 6.56  | 6.56  | 6.55  | 6.86  | 6.69  | 6.73  | 6.58  | 7.61  | 7.45  | 7.63  | 7.68  | 7.73  | 0.95                  |
| 12              | 223586_at      | AF256215               | ARNTL2                 | 0.000062 | 6.96  | 7.03  | 7.15  | 7.32  | 7.43  | 7.47  | 7.19  | 7.02  | 7.41  | 7.72  | 7.54  | 7.42  | 8.84  | 8.89  | 8.91  | 8.91  | 8.97  | 0.97                  |
| 12              | 205681_at      | NM_004049              | BCL2A1                 | 0.000011 | 5.29  | 5.14  | 5.28  | 5.77  | 5.67  | 6.11  | 5.30  | 5.39  | 5.60  | 6.10  | 6.14  | 8.62  | 9.38  | 9.51  | 8.71  | 9.12  | 8.87  | 1.25                  |
| 12              | 222070_at      | AW090043               | DND1                   | 0.000001 | 8.42  | 8.37  | 8.76  | 8.70  | 8.58  | 8.83  | 8.55  | 8.54  | 8.91  | 9.19  | 9.33  | 9.11  | 10.86 | 11.06 | 10.94 | 11.36 | 11.29 | 0.73                  |
| 12              | 1558783_at     | AK024805               | WTAP                   | 0.000020 | 6.99  | 7.10  | 6.99  | 7.18  | 6.81  | 7.43  | 6.90  | 7.24  | 7.85  | 7.77  | 7.27  | 7.71  | 10.40 | 10.44 | 10.73 | 11.04 | 11.14 | 0.66                  |
| 12              | 57739_at       | AI949010               | DND1                   | 0.000026 | 9.19  | 9.19  | 8.86  | 9.14  | 9.12  | 9.72  | 9.24  | 9.35  | 9.86  | 10.07 | 10.35 | 9.95  | 11.98 | 11.97 | 11.90 | 12.41 | 12.47 | 0.61                  |
| 12              | 231412_at      | H04388                 | DKFZp686L14188         | 0.000005 | 7.48  | 7.12  | 7.32  | 7.43  | 7.41  | 7.59  | 7.39  | 7.47  | 7.44  | 7.75  | 7.73  | 7.76  | 8.68  | 8.65  | 8.78  | 8.92  | 9.00  | 0.77                  |
| 12              | 205476_at      | NM_004591              | CCL20                  | 0.000000 | 6.13  | 6.13  | 6.07  | 6.38  | 6.17  | 6.56  | 6.43  | 6.51  | 6.47  | 7.29  | 7.00  | 7.06  | 10.39 | 10.39 | 10.58 | 10.30 | 10.34 | 0.92                  |
| 12              | 1568615_a_at   | BG197463               | ---                    | 0.000000 | 5.74  | 5.55  | 5.97  | 5.59  | 5.59  | 5.81  | 6.03  | 5.92  | 6.18  | 6.83  | 7.03  | 6.92  | 9.18  | 9.23  | 9.07  | 9.10  | 9.55  | 0.76                  |
| 12              | 216260_at      | AK001827               | DICER1                 | 0.000017 | 7.14  | 6.72  | 6.91  | 6.61  | 6.79  | 6.93  | 6.83  | 6.87  | 7.10  | 7.94  | 7.85  | 7.75  | 9.37  | 9.24  | 9.63  | 9.27  | 9.59  | 0.86                  |
| 12              | 242790_at      | AA935515               | SNF8                   | 0.000000 | 7.86  | 7.80  | 7.69  | 7.66  | 7.73  | 7.52  | 7.98  | 7.74  | 7.89  | 8.21  | 8.23  | 8.28  | 9.77  | 10.02 | 9.84  | 9.91  | 10.05 | 0.75                  |
| 12              | 209267_s_at    | AB040120               | SLC39A8                | 0.000331 | 7.33  | 7.53  | 7.36  | 7.37  | 7.13  | 7.87  | 7.47  | 7.64  | 8.24  | 8.29  | 8.20  | 8.14  | 10.31 | 10.40 | 10.82 | 10.05 | 10.20 | 1.13                  |
| 12              | 224832_at      | AB051487               | DUSP16                 | 0.000095 | 7.90  | 8.32  | 8.16  | 8.09  | 8.11  | 8.12  | 8.22  | 8.16  | 8.48  | 8.65  | 8.68  | 8.80  | 9.75  | 9.66  | 10.02 | 9.79  | 9.89  | 0.84                  |
| 12              | 225800_at      | AI990891               | JAZF1                  | 0.015174 | 5.97  | 6.20  | 6.07  | 6.15  | 6.24  | 6.29  | 6.17  | 5.96  | 6.28  | 6.73  | 6.52  | 6.95  | 7.28  | 7.50  | 8.21  | 8.06  | 8.23  | 0.91                  |
| 12              | 201642_at      | NM_005534              | IFNGR2                 | 0.020412 | 9.06  | 8.89  | 8.85  | 8.93  | 9.06  | 8.93  | 8.93  | 8.96  | 9.03  | 9.25  | 9.21  | 9.38  | 9.68  | 9.80  | 10.02 | 9.75  | 10.03 | 1.00                  |
| 12              | 213593_s_at    | AW978896               | TRA2A                  | 0.023298 | 8.41  | 8.97  | 8.42  | 8.36  | 7.59  | 8.28  | 8.49  | 8.24  | 8.59  | 8.47  | 8.51  | 8.70  | 9.76  | 9.70  | 9.67  | 10.11 | 10.36 | 1.27                  |
| 12              | 226189_at      | BF513121               | ITGB8                  | 0.000939 | 4.42  | 4.67  | 4.35  | 4.05  | 3.97  | 4.20  | 4.81  | 4.48  | 5.53  | 4.85  | 4.95  | 4.87  | 7.30  | 7.12  | 7.71  | 7.67  | 8.05  | 0.88                  |
| 12              | 227670_at      | N74222                 | ZNF75A                 | 0.004731 | 7.55  | 7.79  | 7.64  | 7.12  | 7.05  | 7.54  | 7.19  | 7.32  | 7.84  | 7.79  | 7.83  | 7.94  | 8.95  | 8.92  | 9.44  | 9.44  | 9.77  | 0.85                  |
| 12              | 218435_at      | NM_013238              | DNAJC15                | 0.000014 | 6.02  | 6.09  | 5.90  | 5.31  | 5.01  | 5.72  | 5.96  | 5.76  | 6.14  | 6.57  | 6.59  | 6.95  | 8.40  | 8.52  | 8.81  | 9.18  | 9.60  | 0.61                  |
| 12              | 227943_at      | AI798680               | HIST2H2AA              | 0.000207 | 5.34  | 5.64  | 5.45  | 5.10  | 4.75  | 5.27  | 5.53  | 5.38  | 5.91  | 5.95  | 5.98  | 6.23  | 7.47  | 7.57  | 8.03  | 8.39  | 8.76  | 0.62                  |
| 12              | 215146_s_at    | AB028966               | KIAA1043               | 0.023287 | 7.81  | 7.74  | 8.06  | 7.50  | 7.31  | 7.99  | 7.74  | 7.91  | 8.70  | 8.10  | 8.44  | 8.22  | 9.34  | 9.19  | 9.70  | 10.15 | 10.32 | 1.00                  |
| 12              | 207030_s_at    | NM_001321              | CSRP2                  | 0.004104 | 7.60  | 7.64  | 7.72  | 7.63  | 7.30  | 7.73  | 7.57  | 7.63  | 7.97  | 7.74  | 7.77  | 7.94  | 8.56  | 8.53  | 8.54  | 9.07  | 9.13  | 0.98                  |
| 12              | 228652_at      | AI279532               | FLJ38288               | 0.042615 | 7.77  | 7.96  | 7.59  | 7.26  | 6.83  | 7.73  | 7.03  | 6.88  | 8.00  | 8.15  | 7.91  | 7.94  | 9.17  | 8.95  | 9.40  | 10.01 | 10.11 | 1.17                  |
| 12              | 203002_at      | NM_016201              | AMOTL2                 | 0.014943 | 10.04 | 10.10 | 10.15 | 9.76  | 9.20  | 9.80  | 9.96  | 9.97  | 10.43 | 10.38 | 10.34 | 10.28 | 10.91 | 10.74 | 11.07 | 11.58 | 11.67 | 1.38                  |
| 12              | 219446_at      | NM_018157              | RIC8B                  | 0.029431 | 7.06  | 7.45  | 7.45  | 7.03  | 6.81  | 7.19  | 7.20  | 7.20  | 7.61  | 7.48  | 7.39  | 7.60  | 8.08  | 8.17  | 8.31  | 8.57  | 8.45  | 1.15                  |
| 12              | 202302_s_at    | NM_023012              | FLJ11021               | 0.001470 | 9.88  | 10.25 | 10.16 | 9.18  | 9.03  | 9.59  | 9.52  | 9.61  | 10.20 | 10.23 | 10.35 | 10.59 | 11.23 | 11.21 | 11.60 | 12.11 | 12.10 | 1.18                  |
| 12              | 203358_s_at    | NM_004456              | EZH2                   | 0.006930 | 7.78  | 8.19  | 8.20  | 6.58  | 6.06  | 7.06  | 7.27  | 7.21  | 8.20  | 8.33  | 8.05  | 8.40  | 9.65  | 9.65  | 10.17 | 10.32 | 10.60 | 1.42                  |
| 12              | 203353_s_at    | NM_015846              | MBD1                   | 0.005774 | 9.04  | 9.09  | 9.05  | 8.90  | 8.85  | 8.86  | 8.82  | 8.90  | 9.18  | 9.22  | 9.25  | 9.27  | 9.52  | 9.57  | 9.69  | 9.81  | 9.75  | 1.02                  |
| 12              | 208370_s_at    | NM_004414              |                        |          |       |       |       |       |       |       |       |       |       |       |       |       |       |       |       |       |       |                       |

| K-Mean<br>Order | Probe<br>Names | Gene<br>Symbol | Adj. p-Value<br>≤0.05,<br>Bonferroni | K-Means<br>Similarity |       |       |       |       |       |       |       |       |       |       |       |       |       |       |       |       |       |            |      |
|-----------------|----------------|----------------|--------------------------------------|-----------------------|-------|-------|-------|-------|-------|-------|-------|-------|-------|-------|-------|-------|-------|-------|-------|-------|-------|------------|------|
|                 |                |                |                                      | c1                    | c2    | c3    | 6h1   | 6h2   | 6h3   | 12h1  | 12h2  | 12h3  | 24h1  | 24h2  | 24h3  | 48h1  | 48h2  | 48h3  | 72h1  | 72h2  | 72h3  | Similarity |      |
| 12              | 201395_at      | NM_005778      | RBMS                                 | 0.016735              | 8.69  | 9.06  | 8.81  | 8.63  | 8.79  | 8.61  | 8.72  | 8.79  | 8.83  | 8.94  | 9.19  | 9.21  | 9.61  | 9.82  | 9.69  | 9.97  | 9.99  | 10.46      | 1.00 |
| 12              | 64488_at       | AW003091       | NPM1                                 | 0.038012              | 8.10  | 8.33  | 8.23  | 8.16  | 8.26  | 8.00  | 8.23  | 8.14  | 8.19  | 8.41  | 8.38  | 8.54  | 8.68  | 8.75  | 8.85  | 8.85  | 8.94  | 9.10       | 1.14 |
| 12              | 201394_s_at    | U23946         | RBMS                                 | 0.032163              | 7.70  | 8.23  | 8.16  | 7.46  | 7.94  | 7.32  | 7.74  | 7.86  | 7.66  | 8.15  | 8.23  | 8.49  | 8.85  | 9.00  | 9.01  | 9.42  | 9.21  | 9.32       | 1.48 |
| 12              | 222251_s_at    | AL133646       | GMEB2                                | 0.011683              | 8.19  | 8.28  | 8.29  | 8.29  | 8.45  | 8.18  | 8.10  | 8.02  | 8.20  | 8.42  | 8.46  | 8.45  | 8.94  | 8.97  | 8.68  | 9.09  | 9.14  | 8.97       | 1.43 |
| 12              | 220731_s_at    | NM_018090      | NECAP2                               | 0.003635              | 8.18  | 8.29  | 8.37  | 8.22  | 8.31  | 8.41  | 8.14  | 8.13  | 8.36  | 8.56  | 8.61  | 8.69  | 8.99  | 9.06  | 8.84  | 9.15  | 9.37  | 9.21       | 1.10 |
| 12              | 208868_s_at    | BF125756       | GABARAPL1                            | 0.004104              | 7.26  | 7.53  | 7.61  | 7.41  | 7.64  | 7.52  | 7.53  | 7.39  | 7.66  | 8.02  | 8.13  | 8.38  | 8.80  | 9.34  | 9.05  | 9.50  | 9.37  | 8.99       | 1.16 |
| 12              | 218182_s_at    | NM_021101      | CLDN1                                | 0.000081              | 7.20  | 7.08  | 7.33  | 7.65  | 8.03  | 7.94  | 7.49  | 7.49  | 7.92  | 8.54  | 8.39  | 8.88  | 9.50  | 9.79  | 9.79  | 10.31 | 10.47 | 9.99       | 1.14 |
| 12              | 220086_at      | NM_022466      | ZNFN1A5                              | 0.002857              | 7.14  | 7.13  | 7.02  | 7.30  | 7.21  | 7.29  | 7.09  | 7.21  | 7.18  | 7.56  | 7.47  | 7.60  | 7.79  | 8.14  | 7.99  | 8.36  | 8.22  | 8.05       | 1.18 |
| 12              | 225559_at      | AK023163       | C3orf19                              | 0.000000              | 8.20  | 8.30  | 8.28  | 8.23  | 8.40  | 8.32  | 8.21  | 8.36  | 8.30  | 8.69  | 8.66  | 8.67  | 9.36  | 9.56  | 9.45  | 9.72  | 9.66  | 9.66       | 0.67 |
| 12              | 204103_at      | NM_002984      | CCL4                                 | 0.000000              | 7.34  | 7.30  | 7.29  | 7.40  | 7.60  | 7.42  | 7.65  | 7.67  | 7.48  | 8.54  | 8.42  | 8.53  | 10.52 | 10.65 | 10.22 | 11.30 | 11.49 | 11.17      | 0.58 |
| 12              | 212667_s_at    | AF133207       | HSPB8                                | 0.000000              | 7.68  | 7.79  | 7.45  | 8.47  | 8.25  | 8.71  | 8.27  | 8.25  | 8.33  | 9.25  | 9.05  | 9.06  | 10.78 | 10.86 | 11.09 | 11.89 | 11.88 | 11.84      | 0.78 |
| 12              | 242329_at      | AW071804       | LOC401317                            | 0.000000              | 6.96  | 6.80  | 6.92  | 7.52  | 7.43  | 7.34  | 7.08  | 7.14  | 7.06  | 8.44  | 8.26  | 8.10  | 10.03 | 9.96  | 9.88  | 10.74 | 10.90 | 11.07      | 0.71 |
| 12              | 210999_s_at    | U66065         | GRB10                                | 0.000000              | 8.23  | 8.34  | 8.29  | 8.65  | 8.67  | 8.67  | 8.43  | 8.50  | 8.65  | 9.33  | 9.54  | 9.42  | 10.65 | 10.82 | 10.51 | 11.43 | 11.39 | 11.66      | 0.64 |
| 12              | 207536_s_at    | NM_001561      | TNFRSF9                              | 0.000005              | 6.75  | 6.54  | 6.50  | 6.86  | 6.71  | 6.77  | 7.08  | 7.05  | 7.16  | 8.06  | 8.26  | 7.60  | 10.35 | 9.80  | 10.19 | 10.36 | 11.12 | 10.79      | 0.69 |
| 12              | 204613_at      | NM_002661      | PLCG2                                | 0.000090              | 8.85  | 8.34  | 8.44  | 8.75  | 8.74  | 8.72  | 9.01  | 8.86  | 8.61  | 9.32  | 9.27  | 9.20  | 10.15 | 10.30 | 10.38 | 10.49 | 10.62 | 10.58      | 0.93 |
| 12              | 215495_s_at    | AL117523       | SAMD4                                | 0.000009              | 6.71  | 6.41  | 6.45  | 6.72  | 6.75  | 6.58  | 6.76  | 6.83  | 6.59  | 7.21  | 7.16  | 7.03  | 7.97  | 8.00  | 7.99  | 8.31  | 8.57  | 8.40       | 0.76 |
| 12              | 212817_at      | AK023253       | DNAJB5                               | 0.000564              | 8.02  | 7.91  | 7.76  | 7.75  | 8.10  | 8.02  | 8.04  | 8.17  | 7.92  | 8.43  | 8.47  | 8.45  | 9.07  | 9.02  | 8.84  | 9.47  | 9.24  | 9.33       | 1.04 |
| 12              | 1555785_a_at   | AY137776       | XRN1                                 | 0.000031              | 4.64  | 4.49  | 4.51  | 4.48  | 4.62  | 4.70  | 4.70  | 4.71  | 4.59  | 5.24  | 5.11  | 5.12  | 5.53  | 5.54  | 5.62  | 6.00  | 5.78  | 6.05       | 0.96 |
| 12              | 223327_x_at    | AF316855       | FLJ22795                             | 0.010201              | 8.44  | 8.55  | 8.39  | 8.62  | 8.91  | 8.41  | 8.46  | 8.81  | 8.60  | 9.16  | 9.21  | 9.11  | 9.58  | 9.98  | 9.76  | 10.39 | 10.48 | 9.94       | 1.23 |
| 12              | 218651_s_at    | NM_018357      | LARP6                                | 0.000001              | 8.65  | 8.70  | 8.59  | 8.82  | 8.99  | 8.70  | 8.47  | 8.81  | 8.72  | 9.54  | 9.60  | 9.34  | 10.04 | 10.07 | 10.03 | 10.64 | 10.60 | 10.64      | 1.05 |
| 12              | 221016_s_at    | NM_031283      | TCF7L1                               | 0.007666              | 7.01  | 7.26  | 7.11  | 7.28  | 6.96  | 7.00  | 7.05  | 7.34  | 7.21  | 7.62  | 7.55  | 7.55  | 8.24  | 8.09  | 8.07  | 8.42  | 8.17  | 8.08       | 1.30 |
| 12              | 222395_s_at    | BE544096       | FLJ13855                             | 0.002661              | 10.19 | 10.72 | 10.55 | 10.52 | 10.29 | 10.14 | 10.71 | 10.53 | 10.02 | 11.16 | 11.08 | 11.30 | 12.41 | 12.24 | 11.97 | 12.68 | 12.52 | 12.43      | 1.22 |
| 12              | 216033_s_at    | S74774         | FYN                                  | 0.000379              | 6.54  | 6.81  | 6.59  | 7.31  | 6.95  | 6.42  | 6.74  | 6.73  | 6.20  | 8.26  | 8.22  | 8.29  | 9.64  | 10.01 | 9.67  | 10.60 | 10.71 | 9.71       | 1.28 |
| 12              | 209410_s_at    | AF000017       | GRB10                                | 0.000084              | 8.31  | 8.39  | 8.31  | 8.58  | 8.66  | 8.26  | 8.50  | 8.50  | 8.21  | 9.16  | 9.24  | 9.41  | 10.32 | 10.48 | 10.05 | 10.87 | 10.67 | 10.41      | 1.11 |
| 12              | 212947_at      | AL031685       | SLC9A8                               | 0.007312              | 7.86  | 8.11  | 7.99  | 7.88  | 8.07  | 7.40  | 8.16  | 8.20  | 7.96  | 8.56  | 8.65  | 8.66  | 9.87  | 9.94  | 9.35  | 10.22 | 9.99  | 9.63       | 1.32 |
| 12              | 220658_s_at    | NM_020183      | ARNTL2                               | 0.000033              | 6.84  | 7.41  | 7.16  | 6.85  | 6.50  | 6.74  | 7.32  | 7.38  | 7.48  | 7.85  | 8.04  | 8.15  | 9.65  | 9.77  | 9.44  | 10.09 | 10.24 | 9.58       | 1.00 |
| 12              | 41387_r_at     | AB002344       | ---                                  | 0.001757              | 8.09  | 8.21  | 8.28  | 8.03  | 8.36  | 7.99  | 8.24  | 8.40  | 8.29  | 9.02  | 8.97  | 9.03  | 10.21 | 10.16 | 9.88  | 10.68 | 10.88 | 9.94       | 1.11 |
| 12              | 224204_x_at    | AF231339       | ARNTL2                               | 0.001894              | 7.49  | 7.87  | 7.71  | 7.55  | 7.62  | 7.47  | 7.68  | 8.01  | 7.90  | 8.24  | 8.52  | 8.39  | 9.77  | 9.67  | 9.33  | 10.19 | 10.42 | 9.54       | 1.04 |
| 12              | 217750_s_at    | NM_023079      | FLJ13855                             | 0.000004              | 10.41 | 10.69 | 10.77 | 10.32 | 10.63 | 10.25 | 10.80 | 10.88 | 10.66 | 11.42 | 11.53 | 11.67 | 12.50 | 12.39 | 12.66 | 12.90 | 12.84 | 12.92      | 0.97 |
| 12              | 218665_at      | NM_012193      | EZD4                                 | 0.000007              | 7.99  | 7.83  | 7.80  | 7.95  | 8.01  | 7.56  | 7.95  | 7.99  | 7.84  | 8.50  | 8.62  | 8.60  | 9.56  | 9.71  | 9.55  | 9.74  | 9.70  | 9.86       | 0.97 |
| 12              | 212356_at      | AB002321       | KIAA0323                             | 0.000255              | 8.43  | 8.38  | 8.42  | 8.48  | 8.58  | 8.24  | 8.53  | 8.48  | 8.33  | 8.77  | 8.97  | 8.84  | 9.42  | 9.51  | 9.38  | 9.54  | 9.51  | 9.64       | 1.10 |
| 12              | 1556907_at     | BM979960       | FLJ32921                             | 0.001458              | 6.82  | 6.74  | 6.81  | 6.75  | 6.79  | 6.59  | 7.02  | 6.93  | 6.80  | 7.08  | 6.99  | 7.08  | 7.36  | 7.38  | 7.41  | 7.55  | 7.64  | 7.49       | 1.22 |
| 12              | 238950_at      | BF056988       | ---                                  | 0.005079              | 6.27  | 6.11  | 6.17  | 6.13  | 6.24  | 6.15  | 6.21  | 6.16  | 6.03  | 6.25  | 6.32  | 6.42  | 6.89  | 6.77  | 6.58  | 7.06  | 7.17  | 7.02       | 1.22 |
| 12              | 202637_s_at    | AI608725       | ICAM1                                | 0.000061              | 7.24  | 7.09  | 7.55  | 7.22  | 7.30  | 7.33  | 7.48  | 7.39  | 7.11  | 7.61  | 7.73  | 7.56  | 9.11  | 9.18  | 8.97  | 9.24  | 9.33  | 8.98       | 1.11 |
| 12              | 202638_s_at    | NM_000201      | ICAM1                                | 0.000021              | 5.83  | 5.93  | 5.73  | 5.74  | 6.05  | 5.78  | 5.99  | 6.05  | 5.76  | 6.32  | 6.38  | 6.21  | 8.55  | 8.53  | 7.92  | 9.08  | 8.90  | 8.54       | 0.95 |
| 12              | 203828_s_at    | NM_004221      | IL32                                 | 0.000920              | 7.40  | 7.18  | 7.17  | 7.23  | 7.58  | 7.03  | 7.47  | 7.53  | 6.95  | 7.99  | 8.13  | 8.04  | 9.86  | 10.13 | 9.59  | 10.73 | 10.55 | 9.75       | 1.10 |
| 12              | 215910_s_at    | AL137000       | FNDC3A                               | 0.000031              | 7.10  | 6.95  | 7.06  | 7.01  | 7.07  | 6.84  | 7.08  | 7.14  | 6.74  | 7.41  | 7.42  | 7.66  | 8.56  | 8.76  | 8.64  | 9.33  | 9.63  | 9.12       | 0.83 |
| 12              | 231367_s_at    | AW300131       | ---                                  | 0.000093              | 6.04  | 5.85  | 5.87  | 6.07  | 6.08  | 5.94  | 6.18  | 5.94  | 6.12  | 6.64  | 6.45  | 6.51  | 7.86  | 7.72  | 7.80  | 8.93  | 9.09  | 8.23       | 0.88 |
| 12              | 220091_at      | NM_017585      | SLC2A6                               | 0.003858              | 8.09  | 7.93  | 7.95  | 8.01  | 8.01  | 7.86  | 8.20  | 8.20  | 7.85  | 8.56  | 8.69  | 8.23  | 9.86  | 9.82  | 9.80  | 10.58 | 10.84 | 9.80       | 1.09 |
| 12              | 205599_at      | NM_005658      | TRAF1                                | 0.000625              | 7.06  | 7.17  | 7.26  | 7.30  | 7.29  | 7.60  | 7.44  | 7.42  | 7.39  | 8.00  | 7.86  | 7.80  | 9.27  | 9.49  | 8.74  | 10.06 | 9.80  | 9.42       | 0.98 |
| 12              | 203861_s_at    | AU146889       | ACTN2                                | 0.005734              | 7.29  | 7.25  | 7.19  | 7.47  | 7.34  | 7.24  | 7.42  | 7.51  | 7.11  | 8.15  | 7.99  | 8.08  | 10.28 | 10.56 | 9.33  | 11.68 | 11.62 | 10.30      | 1.16 |
| 12              | 227099_s_at    | AW276078       | LOC387763                            | 0.000013              | 6.13  | 5.98  | 6.15  | 6.19  | 6.06  | 6.38  | 6.54  | 6.22  | 6.17  | 6.73  | 6.75  | 6.69  | 9.33  | 9.48  | 8.67  | 10.60 | 10.74 | 9.92       | 0.86 |
| 12              | 208335_s_at    | NM_002036      | FY                                   | 0.000972              | 6.33  | 6.20  | 6.32  | 6.25  | 6.26  | 6.29  | 6.26  | 6.29  | 5.97  | 6.48  | 6.43  | 6.52  | 7.96  | 7.95  | 7.35  | 8.31  | 8.66  | 8.08       | 1.14 |
| 12              | 207139_at      | NM_000704      | ATP4A                                | 0.030812              | 7.37  | 7.14  | 7.35  | 7.29  | 7.44  | 7.21  | 7.33  | 7.55  | 7.16  | 7.83  | 7.86  | 7.73  | 8.83  | 8.71  | 8.13  | 9.73  | 10.00 | 9.06       | 1.43 |
| 12              | 218747_s_at    | NM_018009      | TAPBP1                               | 0.001116              | 7.35  | 7.18  | 7.33  | 6.97  | 7.05  | 6.72  | 7.40  | 7.33  | 7.10  | 7.92  | 7.94  | 7.95  | 8.97  | 9.03  | 8.50  | 10.04 | 9.96  | 9.24       | 1.19 |
| 12              | 44702_at       | R77097         | SYDE1                                | 0.017143              | 9.71  | 9.60  | 9.64  | 9.60  | 9.62  | 9.40  | 9.64  | 9.75  | 9.46  | 10.08 | 10.09 | 9.94  | 10.86 | 10.72 | 10.36 | 11.37 | 11.32 | 10.82      | 1.30 |
| 12              | 205193_at      | NM_012323      | MAFF                                 | 0.000328              | 7.96  | 7.52  | 7.83  | 7.65  | 7.98  | 7.71  | 8.14  | 8.02  | 7.75  | 8.51  | 8.49  | 8.40  | 9.26  | 9.17  | 9.28  | 10.16 | 9.92  | 9.69       | 1.02 |
| 12              | 202669_s_at    | U16797         | EFNB2                                | 0.000314              | 7.19  | 7.01  | 6.83  | 7.12  | 7.05  | 6.86  | 7.76  | 7.66  | 7.34  | 8.31  | 8.07  | 7.70  | 9.66  | 9.26  | 9.10  | 10.76 | 11.04 | 10.14      | 1.07 |
| 12              | 206374_at      | NM_004420      | DUSP8                                | 0.000009              | 7.72  | 7.66  | 7.83  | 7.53  | 7.80  | 7.61  | 7.74  | 7.83  | 7.91  | 8.63  | 8.75  | 8.41  | 9.85  | 9.59  | 9.34  | 10.30 | 10.60 | 10.27      | 0.77 |
| 12              | 1555409_a_at   | AF218570       | MLL3 /// BAGE5 /// BAGE3             | 0.006016              | 6.00  | 6.11  | 5.98  | 5.98  | 5.87  | 6.13  | 5.99  | 5.97  | 5.90  | 6.06  | 6.02  | 6.19  | 7.05  | 7.00  | 6.88  | 7.73  | 7.42  | 7.07       | 1.28 |
| 12              | 215501_s_at    | AK022513       | DUSP10                               | 0.008852              | 7.52  | 7.24  | 7.21  | 7.18  | 7.35  | 7.39  | 7.29  | 7.41  | 7.17  | 7.48  | 7.48  | 7.47  | 7.94  | 8.03  | 7.97  | 8.15  | 8.23  | 8.11       | 1.12 |
| 12              | 202192_s_at    | NM_0           |                                      |                       |       |       |       |       |       |       |       |       |       |       |       |       |       |       |       |       |       |            |      |

| K-Mean<br>Order | Probe<br>Names | GBiD      | Gene<br>Symbol | Adj. p-Value<br><=0.05, |       |       |       |       |       |       |       |       |       |       |       |       |       |       |       |       |       |       | K-Means<br>Similarity |
|-----------------|----------------|-----------|----------------|-------------------------|-------|-------|-------|-------|-------|-------|-------|-------|-------|-------|-------|-------|-------|-------|-------|-------|-------|-------|-----------------------|
|                 |                |           |                | Bonferroni              | c1    | c2    | c3    | 6h1   | 6h2   | 6h3   | 12h1  | 12h2  | 12h3  | 24h1  | 24h2  | 24h3  | 48h1  | 48h2  | 48h3  | 72h1  | 72h2  | 72h3  |                       |
| 12              | 1559691_at     | BC032767  | EEF1B2         | 0.019249                | 6.53  | 6.20  | 6.19  | 6.56  | 6.26  | 6.44  | 6.38  | 6.53  | 6.69  | 6.51  | 6.61  | 6.21  | 7.73  | 7.58  | 7.59  | 7.34  | 7.57  | 7.77  | 1.57                  |
| 12              | 235756_at      | AW802645  | ---            | 0.006330                | 7.89  | 7.52  | 7.65  | 7.79  | 7.70  | 7.87  | 7.91  | 8.00  | 7.98  | 7.93  | 8.22  | 7.89  | 9.06  | 9.09  | 8.97  | 8.77  | 8.94  | 9.26  | 1.36                  |
| 12              | 215006_at      | AK023816  | ---            | 0.005229                | 7.95  | 8.03  | 7.98  | 7.83  | 7.62  | 8.05  | 7.86  | 7.83  | 8.25  | 7.95  | 8.10  | 8.15  | 9.16  | 9.31  | 9.17  | 9.06  | 9.37  | 9.51  | 1.09                  |
| 12              | 240558_at      | AI023335  | ROBO1          | 0.006805                | 5.23  | 5.23  | 5.24  | 5.21  | 5.17  | 5.22  | 5.25  | 5.23  | 5.57  | 5.30  | 5.39  | 5.36  | 6.15  | 6.31  | 6.07  | 6.02  | 6.13  | 6.36  | 1.26                  |
| 12              | 235646_at      | BF515595  | PIP5K1A        | 0.021108                | 6.83  | 6.56  | 6.70  | 6.90  | 6.55  | 7.05  | 6.91  | 6.94  | 7.27  | 6.84  | 7.08  | 6.74  | 8.03  | 7.92  | 8.03  | 8.19  | 7.90  | 8.16  | 1.45                  |
| 12              | 239433_at      | AA532807  | LRRRC8E        | 0.016359                | 7.69  | 7.40  | 7.25  | 7.53  | 7.38  | 7.61  | 7.52  | 7.50  | 7.62  | 7.59  | 7.68  | 7.61  | 8.17  | 8.20  | 8.34  | 8.38  | 8.58  | 8.59  | 0.98                  |
| 12              | 236155_at      | AW974609  | ---            | 0.049416                | 7.38  | 7.06  | 6.84  | 7.00  | 6.77  | 7.14  | 6.97  | 7.08  | 7.40  | 7.34  | 7.52  | 7.11  | 8.08  | 8.16  | 8.39  | 8.50  | 8.44  | 8.40  | 1.09                  |
| 12              | 209343_at      | BC002449  | EFHD1          | 0.006181                | 8.02  | 7.76  | 7.86  | 7.80  | 7.74  | 7.89  | 7.94  | 7.76  | 7.98  | 8.08  | 8.00  | 8.04  | 8.60  | 8.49  | 8.70  | 8.78  | 8.61  | 8.62  | 1.11                  |
| 12              | 203204_s_at    | BC002558  | JMJD2A         | 0.041259                | 8.38  | 8.30  | 8.20  | 8.19  | 8.25  | 8.36  | 8.39  | 8.30  | 8.39  | 8.38  | 8.34  | 8.40  | 8.69  | 8.71  | 8.77  | 8.75  | 8.69  | 8.84  | 1.24                  |
| 12              | 228923_at      | AW166825  | S100A6         | 0.014716                | 6.64  | 6.67  | 6.56  | 6.71  | 6.80  | 6.71  | 6.60  | 6.63  | 6.69  | 6.93  | 6.92  | 7.12  | 7.08  | 6.96  | 7.14  | 7.25  | 7.28  | 7.38  | 1.65                  |
| 12              | 212666_at      | AB046845  | SMURF1         | 0.006860                | 7.69  | 8.15  | 8.17  | 8.40  | 8.51  | 8.16  | 8.27  | 8.38  | 8.43  | 8.67  | 8.75  | 8.94  | 9.31  | 9.38  | 9.04  | 9.82  | 9.74  | 10.05 | 1.34                  |
| 12              | 219361_s_at    | NM_022767 | ISG20L1        | 0.002991                | 8.73  | 8.98  | 9.05  | 9.14  | 9.09  | 8.90  | 8.83  | 9.11  | 9.07  | 9.27  | 9.50  | 9.55  | 9.75  | 9.80  | 9.94  | 10.37 | 10.27 | 10.26 | 1.11                  |
| 12              | 200920_s_at    | AL535380  | BTG1           | 0.019549                | 11.25 | 11.57 | 11.41 | 11.97 | 12.00 | 11.40 | 11.72 | 11.66 | 11.65 | 12.06 | 12.06 | 12.19 | 12.53 | 12.58 | 12.58 | 13.05 | 13.22 | 12.86 | 1.48                  |
| 12              | 209183_s_at    | AL136653  | C10orf10       | 0.000278                | 6.81  | 7.09  | 7.01  | 7.06  | 7.14  | 7.12  | 7.24  | 7.44  | 7.28  | 7.48  | 7.76  | 7.35  | 7.96  | 8.02  | 8.03  | 8.63  | 8.59  | 8.50  | 1.09                  |
| 12              | 212098_at      | AL134724  | LOC151162      | 0.000539                | 8.49  | 8.78  | 8.82  | 8.83  | 9.27  | 8.68  | 9.05  | 9.31  | 9.25  | 9.52  | 9.58  | 9.58  | 10.31 | 10.52 | 10.22 | 10.76 | 10.95 | 10.82 | 1.09                  |
| 12              | 203233_at      | NM_000418 | IL4R           | 0.014580                | 7.66  | 8.02  | 7.88  | 8.08  | 8.28  | 7.90  | 8.12  | 8.26  | 8.17  | 8.36  | 8.33  | 8.31  | 8.71  | 8.79  | 9.01  | 9.25  | 9.13  | 9.07  | 1.31                  |
| 12              | 220127_s_at    | NM_017703 | FBXL12         | 0.030562                | 8.68  | 8.52  | 8.47  | 8.39  | 8.58  | 8.37  | 8.48  | 8.51  | 8.78  | 8.89  | 9.00  | 8.86  | 9.14  | 9.07  | 9.15  | 9.38  | 9.36  | 9.26  | 1.44                  |
| 12              | 201057_s_at    | NM_004487 | GOLGB1         | 0.005614                | 8.81  | 8.94  | 8.90  | 9.08  | 9.17  | 9.09  | 8.76  | 8.98  | 8.97  | 9.31  | 9.42  | 9.43  | 9.80  | 9.95  | 9.88  | 9.88  | 9.81  | 10.24 | 1.37                  |
| 12              | 208303_s_at    | NM_022148 | CRLF2          | 0.046278                | 7.27  | 7.14  | 7.18  | 7.32  | 7.29  | 7.24  | 7.44  | 7.49  | 7.42  | 7.67  | 7.58  | 7.21  | 8.07  | 8.20  | 7.79  | 8.66  | 8.32  | 8.65  | 1.41                  |
| 12              | 205446_s_at    | NM_001880 | ATF2           | 0.028498                | 6.80  | 6.67  | 6.73  | 6.76  | 6.77  | 6.81  | 6.62  | 6.64  | 6.53  | 6.98  | 6.98  | 7.05  | 7.22  | 7.34  | 7.18  | 7.63  | 7.28  | 7.33  | 1.71                  |
| 12              | 224978_s_at    | BF430981  | USP36          | 0.015737                | 9.06  | 9.10  | 8.97  | 9.09  | 9.14  | 8.85  | 8.77  | 8.98  | 8.72  | 9.25  | 9.36  | 9.56  | 10.04 | 10.06 | 9.78  | 10.30 | 9.98  | 10.00 | 1.56                  |
| 12              | 31637_s_at     | X72631    | THRA /// NR1D1 | 0.000223                | 10.26 | 10.18 | 10.17 | 9.92  | 9.81  | 9.83  | 10.27 | 10.39 | 10.39 | 10.97 | 11.07 | 10.76 | 10.72 | 10.75 | 11.03 | 11.53 | 11.77 | 11.89 | 1.94                  |
| 12              | 1568449_at     | AJ012498  | RPS6KA3        | 0.035370                | 5.28  | 4.92  | 5.12  | 5.59  | 5.34  | 5.48  | 5.87  | 5.52  | 5.80  | 6.18  | 6.56  | 6.10  | 6.45  | 6.95  | 7.73  | 7.82  | 8.21  | 7.85  | 1.29                  |
| 12              | 241612_at      | W57731    | FOXD3          | 0.005927                | 5.43  | 5.25  | 5.26  | 5.39  | 5.47  | 5.46  | 5.43  | 5.48  | 5.45  | 5.57  | 5.55  | 5.61  | 5.61  | 5.62  | 5.68  | 5.92  | 6.02  | 5.89  | 1.74                  |
| 12              | 213672_at      | AA621558  | MARS           | 0.033023                | 7.57  | 7.94  | 7.81  | 6.74  | 6.43  | 6.65  | 6.98  | 7.15  | 7.51  | 7.77  | 7.90  | 8.03  | 8.49  | 8.79  | 8.93  | 8.98  | 8.93  | 9.90  | 1.78                  |
| 12              | 201377_at      | NM_014847 | UBAP2L         | 0.000703                | 9.25  | 9.69  | 9.58  | 9.03  | 8.66  | 8.83  | 9.04  | 9.01  | 9.08  | 9.43  | 9.45  | 9.62  | 9.95  | 10.01 | 9.96  | 10.51 | 10.53 | 10.68 | 1.68                  |
| 12              | 225321_s_at    | AV762653  | PILRB          | 0.036726                | 9.24  | 9.72  | 9.69  | 8.89  | 8.84  | 8.74  | 9.36  | 9.26  | 9.33  | 9.48  | 9.64  | 10.06 | 9.93  | 10.12 | 10.21 | 10.55 | 10.74 | 10.98 | 1.84                  |
| 12              | 226069_at      | AA404269  | PRICKLE1       | 0.034683                | 6.86  | 7.36  | 7.07  | 5.53  | 5.59  | 5.77  | 6.53  | 6.40  | 7.07  | 6.85  | 6.89  | 7.13  | 7.31  | 7.22  | 7.83  | 8.09  | 8.01  | 8.40  | 2.49                  |
| 12              | 219615_s_at    | NM_003740 | KCNK5          | 0.026555                | 7.74  | 7.84  | 7.70  | 7.17  | 7.24  | 7.06  | 7.60  | 7.39  | 7.18  | 7.46  | 7.67  | 7.64  | 8.04  | 8.08  | 7.95  | 8.31  | 8.29  | 8.15  | 2.33                  |
| 12              | 212153_at      | AB007930  | POGZ           | 0.002285                | 9.75  | 9.91  | 9.87  | 9.38  | 9.49  | 9.32  | 9.71  | 9.72  | 9.61  | 9.74  | 9.81  | 9.92  | 10.06 | 10.06 | 10.22 | 10.35 | 10.37 | 10.32 | 1.95                  |
| 12              | 204159_at      | NM_001262 | CDKN2C         | 0.007096                | 9.73  | 9.78  | 9.83  | 7.68  | 6.96  | 8.08  | 8.87  | 8.78  | 9.40  | 9.75  | 9.77  | 9.70  | 10.56 | 10.48 | 10.90 | 10.71 | 10.97 | 11.41 | 2.54                  |
| 12              | 47608_at       | AI697401  | TJAP1          | 0.000336                | 8.44  | 8.80  | 8.59  | 8.41  | 8.45  | 8.05  | 8.68  | 8.73  | 8.67  | 9.10  | 9.09  | 9.25  | 9.53  | 9.65  | 9.63  | 10.15 | 9.97  | 10.20 | 1.20                  |
| 12              | 229356_x_at    | AK002176  | INO80          | 0.000558                | 9.74  | 9.85  | 9.79  | 9.74  | 9.54  | 9.49  | 9.69  | 9.81  | 9.60  | 10.10 | 10.11 | 10.11 | 10.30 | 10.45 | 10.41 | 10.58 | 10.52 | 10.62 | 1.37                  |
| 12              | 225251_at      | AK021761  | RAB24          | 0.013769                | 8.85  | 9.05  | 8.98  | 8.84  | 8.88  | 8.22  | 9.03  | 9.08  | 8.56  | 9.68  | 9.77  | 9.84  | 9.99  | 10.05 | 9.83  | 10.56 | 10.56 | 10.56 | 1.78                  |
| 12              | 224984_at      | W61007    | NFAT5          | 0.001857                | 9.79  | 10.12 | 9.95  | 9.83  | 9.83  | 10.08 | 10.17 | 10.24 | 10.52 | 10.39 | 10.50 | 10.52 | 10.96 | 10.87 | 11.21 | 11.46 | 11.45 | 11.49 | 1.00                  |
| 12              | 214911_s_at    | S78771    | BRD2           | 0.048295                | 9.94  | 9.91  | 9.71  | 10.00 | 9.54  | 9.87  | 10.13 | 10.25 | 10.57 | 10.41 | 10.70 | 10.35 | 10.96 | 10.95 | 11.33 | 11.53 | 11.88 | 12.32 | 1.26                  |
| 12              | 208685_x_at    | AA902767  | BRD2           | 0.047052                | 10.08 | 10.00 | 9.89  | 10.01 | 9.64  | 9.82  | 10.16 | 10.33 | 10.45 | 10.40 | 10.64 | 10.30 | 10.90 | 10.80 | 11.18 | 11.42 | 11.68 | 12.18 | 1.33                  |
| 12              | 222239_s_at    | AL117626  | DDX26          | 0.001546                | 6.17  | 6.44  | 6.11  | 5.89  | 5.30  | 6.13  | 6.61  | 6.11  | 7.31  | 7.51  | 7.30  | 7.45  | 8.80  | 8.52  | 9.03  | 9.40  | 9.60  | 9.55  | 1.00                  |
